# Supplementary material for: Water temperature drives phytoplankton blooms in coastal waters
Source: PLoS One. 2019 Apr 5;14(4):e0214933. doi: 10.1371/journal.pone.0214933 (PMC6450617; doi:10.1371/journal.pone.0214933)
Supplement: S1 Data — Sheets one and two correspond to the high-frequency parameters for 2015 and 2016 respectively; three and four to the nutrients concentrations; five and six to the phytoplankton (< 6 μm) abundances; seven and eight to the phytoplankton (6–200 μm) abundances and diversity; nine and ten to the HPLC Chl a concentrations. (XLSX) [file pone.0214933.s001.xlsx]

## Sheet: High Freq 2015
Date	Temperature	Salinity	Concentration O2	Saturation O2	Chlorophyll a fluorescence	Chl a corrected	Turbidity	Temp_Air	Speed_Wind	Direction_Wind	PAR	UVA	UVB
2015-01-07 15:30:00	8.1743	33.838	289.09	97.987	0.7564	1.16255	0.5859	13.9	1.49	260	509.781	54.698	28.5235
2015-01-07 15:45:00	8.3752	33.926	290.571	98.8933	0.8296	1.24893	0.63	14.1	1.56	273	430.833	46.4765	23.4899
2015-01-07 16:00:00	8.3399	33.786	290.75	98.9569	0.8296	1.24893	0.5922	14	2.55	258	351.873	37.9195	18.2886
2015-01-07 16:15:00	8.3046	33.936	292.123	99.3787	0.8906	1.32091	0.5859	13.8	0.99	198	279.532	29.698	13.7584
2015-01-07 16:30:00	8.2795	33.863	293.439	99.6922	0.8296	1.24893	0.6048	13.9	2.27	248	200.598	21.9799	9.73154
2015-01-07 16:45:00	8.1095	33.852	292.417	98.9944	0.8052	1.22014	0.5985	13.4	2.04	232	121.673	14.7651	6.04027
2015-01-07 17:00:00	8.0846	33.905	292.251	98.8969	0.8418	1.26332	0.5922	13.2	2.19	230	49.3269	8.72483	3.69128
2015-01-07 17:15:00	8.0697	33.891	293.141	99.1373	0.7808	1.19134	0.5985	12.5	3.09	248	26.3099	3.85906	1.67785
2015-01-07 17:30:00	8.1444	33.867	294.794	99.7199	0.8052	1.22014	0.6174	12.3	1.9	238	6.57791	1.00671	0.503356
2015-01-07 17:45:00	7.9263	33.815	293.859	99.0647	0.7686	1.17695	0.5922	11.9	1.35	250	0	0.335612	0.335612
2015-01-07 18:00:00	7.9016	33.819	292.227	98.4014	0.7564	1.16255	0.5985	10.5	1.26	305	0	0	0.16783
2015-01-07 18:15:00	7.946	33.854	292.674	98.6076	0.8174	1.23453	0.6237	9.4	0.74	29	0	0	0.167858
2015-01-07 18:30:00	7.8084	33.782	290.801	97.9607	0.7442	1.14816	0.63	11.1	0.66	229	0	0	0.167866
2015-01-07 18:45:00	7.9756	33.826	291.434	98.2426	0.8296	1.24893	0.6174	9.2	0.16	269	0	0	0.167872
2015-01-07 19:00:00	7.9559	33.825	291.961	98.258	1.1346	1.60883	0.6174	8.7	0.74	232	0	0.167893	0.167893
2015-01-07 19:15:00	7.9115	33.829	292.346	98.35	0.9638	1.40728	0.6174	9.2	1.4	299	0	0	0.1679
2015-01-07 19:30:00	7.8329	33.817	293.126	98.3669	1.098	1.56564	0.6615	9.4	1.27	234	0	0	0.335799
2015-01-07 19:45:00	7.828	33.822	292.812	98.3418	0.9028	1.3353	0.6363	10.2	1.88	270	0	0	0.167921
2015-01-07 20:00:00	7.8035	33.806	291.542	97.9433	1.0492	1.50806	0.63	10.1	2.1	281	0	0.167926	0.167926
2015-01-07 20:15:00	7.8035	33.826	292.074	98.0632	1.0614	1.52245	0.6174	10	2.16	272	0	0	0.167947
2015-01-07 20:30:00	7.7546	33.814	294.333	98.6861	0.9882	1.43608	0.6174	10.1	3.1	249	0	0.167954	0.335907
2015-01-07 20:45:00	7.779	33.85	292.081	98.0284	0.9394	1.37849	0.6048	10	2.06	257	0	0	0.335926
2015-01-07 21:00:00	7.7497	33.819	293.139	98.3423	0.8418	1.26332	0.6237	9.8	2.41	250	0	0	0.335959
2015-01-07 21:15:00	7.779	33.82	291.945	97.9637	0.7564	1.16255	0.6174	9.6	1.98	240	0	0	0.167981
2015-01-07 21:30:00	7.7888	33.82	293.133	98.5325	0.8906	1.32091	0.63	9.6	1.92	254	0	0	0.167982
2015-01-07 21:45:00	7.7937	33.884	292.959	98.4617	0.9272	1.3641	0.63	8.8	2.92	262	0	0	0.167983
2015-01-07 22:00:00	7.7643	33.834	292.999	98.486	0.9394	1.37849	0.6363	8.7	2.6	246	0	0	0.335965
2015-01-07 22:15:00	7.8427	33.856	293.357	98.7162	0.9394	1.37849	0.6489	8.8	2.47	269	0	0	0.167983
2015-01-07 22:30:00	7.779	33.84	292.824	98.314	0.8174	1.23453	0.6489	8	3.14	256	0	0.167983	0
2015-01-07 22:45:00	7.7839	33.865	292.916	98.3713	0.9028	1.3353	0.6048	7.6	2.57	259	0	0	0
2015-01-07 23:00:00	7.7594	33.849	291.661	97.8339	1.22	1.7096	0.6678	7.6	2.01	277	0	0	0.335965
2015-01-07 23:15:00	7.7497	33.858	292.846	98.227	0.976	1.42168	0.6237	7.6	2.25	300	0	0.167983	0.167983
2015-01-07 23:30:00	7.7546	33.864	292.828	98.1946	0.7686	1.17695	0.6111	7	2.32	318	0	0	0.167983
2015-01-07 23:45:00	7.779	33.889	292.82	98.2735	0.7686	1.17695	0.6552	6.9	1.94	306	0	0	0.167983
2015-01-08	7.7937	33.894	292.773	98.2728	0.7686	1.17695	0.6426	6.5	1.77	326	0	0	0.167983
2015-01-08 00:15:00	7.662	33.875	292.1	97.8164	0.8662	1.29212	0.6615	6.1	1.91	264	0	0	0.167983
2015-01-08 00:30:00	7.6135	33.853	293.321	98.0332	0.7808	1.19134	0.6111	5.8	2.17	275	0	0	0.167983
2015-01-08 00:45:00	7.5844	33.812	292.948	97.8419	0.8052	1.22014	0.6048	5.6	1.78	284	0	0	0.167984
2015-01-08 01:00:00	7.5844	33.812	292.598	97.7364	0.8662	1.29212	0.6426	5.5	2.21	289	0	0	0.167991
2015-01-08 01:15:00	7.5747	33.812	292.666	97.7755	0.7198	1.11936	0.5985	5.1	0.7	184	0	0	0.168005
2015-01-08 01:30:00	7.7058	33.901	290.728	97.4841	0.7564	1.16255	0.6426	6	0.88	233	0	0	0.168022
2015-01-08 01:45:00	7.7302	33.907	290.753	97.4782	0.7076	1.10497	0.6363	6.8	0.79	115	0	0	0.168026
2015-01-08 02:00:00	7.7155	33.931	290.092	96.9673	0.7686	1.17695	0.6048	6.4	0.41	13	0	0	0.168036
2015-01-08 02:15:00	7.3153	33.629	293.757	97.3736	0.9028	1.3353	0.5859	5.9	1.27	316	0	0	0.168033
2015-01-08 02:30:00	7.3535	33.651	293.641	97.4444	0.8418	1.26332	0.5859	5.8	0.63	310	0	0	0.168028
2015-01-08 02:45:00	7.3822	33.683	293.329	97.4248	0.8296	1.24893	0.5733	5.2	0.48	266	0	0.336063	0.168031
2015-01-08 03:00:00	7.4062	33.689	293.907	97.631	0.976	1.42168	0.5859	5.5	2.2	270	0	0	0.168029
2015-01-08 03:15:00	7.3583	33.646	293.685	97.4664	1.0004	1.45047	0.567	5.3	2.6	311	0	0	0.16803
2015-01-08 03:30:00	7.387	33.668	293.744	97.5213	1.0004	1.45047	0.5922	5.6	2.01	291	0	0	0.168033
2015-01-08 03:45:00	7.3822	33.633	293.634	97.4626	1.0126	1.46487	0.567	5.7	1.8	294	0	0	0.168036
2015-01-08 04:00:00	7.3631	33.642	293.696	97.4463	1.0248	1.47926	0.5922	6	2.62	286	0	0	0.168039
2015-01-08 04:15:00	7.3488	33.626	293.81	97.4528	1.0736	1.53685	0.5796	5.7	3.13	296	0	0	0.168039
2015-01-08 04:30:00	7.3488	33.636	293.7	97.412	1.0004	1.45047	0.5859	5.9	3.3	278	0	0	0.168037
2015-01-08 04:45:00	7.3583	33.646	293.841	97.497	1.0858	1.55124	0.5733	6	2.97	287	0	0	0.168038
2015-01-08 05:00:00	7.3583	33.646	293.889	97.513	1.0248	1.47926	0.5733	6	2.34	289	0	0	0.168034
2015-01-08 05:15:00	7.3535	33.651	293.847	97.5023	1.1346	1.60883	0.5985	6.2	2.29	285	0	0	0.168038
2015-01-08 05:30:00	7.3058	33.648	294.118	97.4839	1.098	1.56564	0.5796	5.8	2.19	286	0	0.168032	0.168032
2015-01-08 05:45:00	7.2963	33.657	293.622	97.304	1.1834	1.66641	0.5859	6.5	3.04	254	0	0	0.168036
2015-01-08 06:00:00	7.2963	33.647	293.757	97.2896	0.9028	1.3353	0.5481	6.6	2.55	299	0	0.168036	0.168036
2015-01-08 06:15:00	7.2915	33.662	293.168	97.1463	1.0126	1.46487	0.5607	4.8	2.69	314	0	0	0.336072
2015-01-08 06:30:00	7.2867	33.657	293.475	97.3508	1.0736	1.53685	0.5733	5	1.88	285	0	0	0.168033
2015-01-08 06:45:00	7.3727	33.662	293.93	97.5685	1.1468	1.62322	0.5733	4.8	1.5	305	0	0.336065	0.168033
2015-01-08 07:00:00	7.3822	33.663	293.816	97.5312	1.0248	1.47926	0.5733	4.9	1.05	255	0	0	0
2015-01-08 07:15:00	7.3679	33.657	293.064	97.2779	1.1224	1.59443	0.567	5.1	1.58	274	0	0	0.168034
2015-01-08 07:30:00	7.3918	33.693	292.873	97.3009	1.1224	1.59443	0.567	4.8	2.39	260	0	0.168038	0.168038
2015-01-08 07:45:00	7.3966	33.689	293.224	97.4042	1.0736	1.53685	0.5922	4.5	1.87	287	0	0	0.168039
2015-01-08 08:00:00	7.3727	33.692	292.413	97.126	1.098	1.56564	0.5985	4.7	1.51	261	0	0.672156	0.336078
2015-01-08 08:15:00	7.3488	33.676	292.803	97.1718	1.0736	1.53685	0.5733	4.7	1.71	289	13.169	2.35255	0.840195
2015-01-08 08:30:00	7.344	33.66	292.104	96.7609	1.0858	1.55124	0.5733	4.3	0.7	238	36.2147	5.54529	2.18451
2015-01-08 08:45:00	7.2249	33.637	291.61	96.4775	1.0004	1.45047	0.567	4.8	1.9	262	65.845	10.2504	4.03294
2015-01-08 09:00:00	7.2012	33.66	291.163	96.093	0.8784	1.30651	0.5733	4.8	1.9	267	88.8919	17.14	6.8896
2015-01-08 09:15:00	7.2202	33.692	285.835	94.6634	0.8174	1.23453	0.5859	5.1	1.87	278	276.549	24.7017	10.7545
2015-01-08 09:30:00	7.2297	33.662	288.93	95.8568	0.976	1.42168	0.5985	5.6	2.5	307	293.01	32.9356	15.2916
2015-01-08 09:45:00	7.2772	33.775	289.608	96.1525	0.8784	1.30651	0.6174	6.3	1.43	265	414.823	42.3458	20.6688
2015-01-08 10:00:00	7.3488	33.656	290.16	96.5649	1.0248	1.47926	0.63	6.7	2.28	288	497.13	51.4185	26.5494
2015-01-08 10:15:00	7.3344	33.759	290.876	96.8472	0.8296	1.24893	0.6048	7.1	1.79	298	576.144	60.9938	32.4292
2015-01-08 10:30:00	7.3249	33.788	290.512	96.7277	0.7442	1.14816	0.5985	7.8	1.72	267	648.468	69.8841	38.8058
2015-01-08 10:45:00	7.387	33.767	290.906	96.9925	0.6344	1.01859	0.6426	9	2	278	727.368	78.9522	45.3555
2015-01-08 11:00:00	7.3631	33.691	291.294	96.7702	0.671	1.06178	0.6174	9.4	1.8	282	674.691	80.6316	48.379
2015-01-08 11:15:00	7.3918	33.693	290.103	96.6985	0.732	1.13376	0.6237	10.1	1.41	242	674.689	85.8267	53.2428
2015-01-08 11:30:00	7.344	33.7	291.154	97.2107	0.8662	1.29212	0.6363	10.7	1.75	268	865.577	98.4078	60.7912
2015-01-08 11:45:00	7.5023	33.823	288.699	97.2436	0.793	1.20574	0.6741	11	2.51	279	898.459	102.934	65.3204
2015-01-08 12:00:00	7.5747	33.763	289.398	96.7406	0.5612	0.932216	0.6111	11.4	2.13	242	914.806	106.787	68.8409
2015-01-08 12:15:00	7.5264	33.691	291.953	97.9717	0.6588	1.04738	0.7245	11.6	2.83	247	852.151	106.28	70.0139
2015-01-08 12:30:00	7.4879	33.669	291.598	97.0914	0.61	0.9898	0.5796	11.9	4.01	263	944.255	111.988	63.1297
2015-01-08 12:45:00	7.5216	33.686	290.904	96.9946	0.549	0.91782	0.5544	12	3.07	253	963.994	113.989	75.2089
2015-01-08 13:00:00	7.5602	33.688	291.737	97.4204	0.5856	0.961008	0.5796	12.3	3.4	269	957.369	113.481	75.206
2015-01-08 13:15:00	7.6814	33.698	293.239	98.1169	0.5734	0.946612	0.6048	12.5	4.34	264	950.785	111.8	73.8622
2015-01-08 13:30:00	7.7009	33.709	293.607	98.3279	0.549	0.91782	0.567	12.7	3.23	279	937.579	109.619	71.8482
2015-01-08 13:45:00	7.735	33.725	292.358	97.9699	0.5856	0.961008	0.5796	13.2	2.35	271	917.753	106.09	69.16
2015-01-08 14:00:00	7.7888	33.742	293.141	98.4345	0.549	0.91782	0.5733	13.4	3.06	286	180.898	99.1973	64.1174
2015-01-08 14:15:00	7.9016	33.78	294.257	99.041	0.671	1.06178	0.63	13	3.42	312	838.696	95.8362	48.1699
2015-01-08 14:30:00	7.9213	33.8	293.779	98.9019	0.6344	1.01859	0.6174	14.1	5.1	318	792.649	89.6211	55.216
2015-01-08 14:45:00	7.9411	33.81	293.609	98.8934	0.732	1.13376	0.6237	13.4	7.52	315	753.181	82.4049	49.3423
2015-01-08 15:00:00	7.9657	33.816	293.342	98.85	0.7686	1.17695	0.6111	13.8	5.77	296	667.667	73.3449	42.9664
2015-01-08 15:15:00	7.9954	33.836	293.292	98.8994	0.8052	1.22014	0.6048	13.5	5.32	322	601.887	65.1223	36.925
2015-01-08 15:30:00	8.035	33.856	293.942	99.2597	0.8906	1.32091	0.6048	12.9	5.72	298	371.657	50.6888	28.5334
2015-01-08 15:45:00	8.0697	33.9	293.908	99.3544	0.9516	1.39289	0.6174	13.1	3.7	266	273.016	41.1255	22.1574
2015-01-08 16:00:00	8.1244	33.964	295.269	100.09	1.0126	1.46487	0.6552	13.1	4.68	308	292.781	36.7632	18.8012
2015-01-08 16:15:00	8.2143	33.945	296.651	100.64	1.1346	1.60883	0.6363	12.6	7.92	308	233.573	29.7129	14.101
2015-01-08 16:30:00	8.2444	34.004	298.298	101.283	1.098	1.56564	0.6552	12.7	8.12	304	121.718	21.3191	9.73628
2015-01-08 16:45:00	8.3046	34.081	300.05	102.063	1.1468	1.62322	0.6426	12.1	8.56	296	88.8302	14.7725	6.21117
2015-01-08 17:00:00	8.2644	34.043	300.235	102.063	1.098	1.56564	0.6363	12.2	6.99	278	55.9313	8.72964	3.69331
2015-01-08 17:15:00	8.3096	34.067	302.814	103.068	1.281	1.78158	0.693	12	5.38	284	19.7405	4.02939	1.67891
2015-01-08 17:30:00	8.3651	34.12	303.151	103.285	1.2322	1.724	0.6552	12	4.88	271	6.58016	1.00738	0.671589
2015-01-08 17:45:00	8.3147	34.101	301.329	102.519	1.22	1.7096	0.6678	12.1	6.39	276	0	0	0.335796
2015-01-08 18:00:00	8.3046	34.081	299.97	102	1.1224	1.59443	0.6426	11.4	6.93	276	0	0	0.167901
2015-01-08 18:15:00	8.2946	34.091	300.024	102.034	1.1102	1.58004	0.6426	11.7	6.35	283	0	0	0.167899
2015-01-08 18:30:00	8.3046	34.091	301.483	102.558	1.1346	1.60883	0.6426	11.6	6.05	282	0	0	0.335798
2015-01-08 18:45:00	8.3147	34.11	301.584	102.614	1.1346	1.60883	0.6489	11.1	5.08	298	0	0	0.167902
2015-01-08 19:00:00	8.3399	34.096	301.721	102.567	1.1346	1.60883	0.6867	11.1	5.09	299	0	0	0.16792
2015-01-08 19:15:00	8.2143	34.052	299.153	101.535	1.1346	1.60883	0.6615	11.1	4.5	293	0	0.167926	0.167926
2015-01-08 19:30:00	8.1943	34.033	298.599	101.246	1.1102	1.58004	0.63	10.8	3.24	276	0	0.167926	0.335852
2015-01-08 19:45:00	8.1544	34.004	298.563	101.161	1.0858	1.55124	0.63	10.5	2.62	282	0	0.335852	0.167926
2015-01-08 20:00:00	8.1145	33.993	298.369	101.024	1.0736	1.53685	0.6678	10.6	3.73	278	0	0	0.335852
2015-01-08 20:15:00	8.1544	34.033	298.617	101.19	1.159	1.63762	0.6678	10.6	3.49	273	0	0	0.335852
2015-01-08 20:30:00	8.1344	34.003	299.424	101.454	1.159	1.63762	0.7245	9.9	3.23	282	0	0	0.167934
2015-01-08 20:45:00	8.1244	34.033	297.8	100.847	1.1956	1.68081	0.6363	12.2	5.78	267	0	0.335892	0.335892
2015-01-08 21:00:00	8.1344	34.023	297.964	100.896	1.1102	1.58004	0.6048	11.7	4.24	248	0	0	0.167954
2015-01-08 21:15:00	8.1244	34.013	298.496	101.07	1.22	1.7096	0.6489	11.1	1.28	219	0	0.335909	0.335909
2015-01-08 21:30:00	8.1244	34.023	298.814	101.184	1.2688	1.76718	0.6426	10.8	4.83	318	0	0	0.335909
2015-01-08 21:45:00	8.1444	34.033	298.283	101.055	1.0736	1.53685	0.6111	11.1	3.17	286	0	0	0.167954
2015-01-08 22:00:00	8.1494	34.028	299.141	101.331	1.1712	1.65202	0.63	12	4.97	326	0	0	0.167954
2015-01-08 22:15:00	8.1145	34.042	300.385	101.707	1.1956	1.68081	0.6363	10.7	2.72	338	0	0	0.167954
2015-01-08 22:30:00	8.0946	34.032	300.671	101.698	1.1956	1.68081	0.6237	10.4	0.91	243	0	0	0.167953
2015-01-08 22:45:00	8.0449	34.012	301.114	101.78	1.1834	1.66641	0.6111	10.8	1.49	274	0	0	0.167954
2015-01-08 23:00:00	8.035	34.012	301.307	101.813	1.0858	1.55124	0.6111	10.1	0.67	207	0	0	0.167953
2015-01-08 23:15:00	7.9559	33.982	300.068	101.21	1.2566	1.75279	0.6615	10.6	1.68	275	0	0	0.167954
2015-01-08 23:30:00	7.9361	33.962	298.795	100.713	1.1224	1.59443	0.6237	9.5	0.35	231	0	0	0.167952
2015-01-08 23:45:00	7.8378	33.94	297.773	100.192	1.0736	1.53685	0.6426	9.7	0.39	257	0	0	0.167954
2015-01-09	7.6814	33.767	295.138	98.7548	0.915	1.3497	0.5859	9.6	1.32	316	0	0	0.167954
2015-01-09 00:15:00	7.7009	33.807	295.291	98.885	0.976	1.42168	0.6048	9.8	1.53	332	0	0	0.335909
2015-01-09 00:30:00	7.6814	33.817	295.516	99.0527	1.0248	1.47926	0.6174	11.1	1.76	351	0	0	0.167954
2015-01-09 00:45:00	7.7253	33.823	295.449	99.0019	1.0614	1.52245	0.6237	11.2	3.2	283	0	0	0.335909
2015-01-09 01:00:00	7.6232	33.755	294.896	98.6661	1.0492	1.50806	0.6174	10.8	4.08	307	0	0	0.167954
2015-01-09 01:15:00	7.7302	33.838	294.531	98.7147	1.0126	1.46487	0.6048	10.9	3.16	318	0	0.335917	0.167959
2015-01-09 01:30:00	7.7497	33.858	295.41	99.097	1.0614	1.52245	0.6048	11.1	1.3	241	0	0	0.167956
2015-01-09 01:45:00	7.7692	33.859	296.277	99.3994	1.0858	1.55124	0.6048	11.3	3.56	304	0	0	0.167955
2015-01-09 02:00:00	7.6329	33.765	295.104	98.6458	1.037	1.49366	0.5985	11.3	4.75	314	0	0.335909	0.167954
2015-01-09 02:15:00	7.5989	33.749	294.839	98.4828	1.159	1.63762	0.5922	11	5.02	319	0	0	0.167954
2015-01-09 02:30:00	7.6183	33.76	294.495	98.439	1.0248	1.47926	0.5796	10.4	4.32	312	0	0	0.167954
2015-01-09 02:45:00	7.6523	33.805	294.453	98.5073	1.098	1.56564	0.5985	11.2	4.67	316	0	0.167954	0.167954
2015-01-09 03:00:00	7.5892	33.758	294.948	98.4824	1.0736	1.53685	0.6048	11.3	1.81	281	0	0	0.335908
2015-01-09 03:15:00	7.5699	33.728	295.526	98.6133	1.1102	1.58004	0.5859	10.9	2.12	290	0	0	0.167954
2015-01-09 03:30:00	7.5554	33.742	295.218	98.5195	1.1224	1.59443	0.5922	11	2.1	320	0	0	0.167951
2015-01-09 03:45:00	7.5602	33.717	294.637	98.2989	1.1346	1.60883	0.5922	11.7	6.5	307	0	0	0.167954
2015-01-09 04:00:00	7.5651	33.713	294.267	98.173	1.1834	1.66641	0.5859	11.4	5.22	316	0	0	0.167954
2015-01-09 04:15:00	7.5941	33.744	294.11	98.2043	1.159	1.63762	0.5859	10.8	4.05	312	0	0	0
2015-01-09 04:30:00	7.6183	33.75	293.768	98.1577	1.0736	1.53685	0.5859	11.2	3.87	271	0	0	0
2015-01-09 04:45:00	7.6183	33.77	293.352	98.0315	1.1346	1.60883	0.5922	10.8	3.17	278	0	0	0.167954
2015-01-09 05:00:00	7.5989	33.749	293.27	97.9482	1.1712	1.65202	0.5859	11.2	5.2	309	0	0	0
2015-01-09 05:15:00	7.6038	33.734	292.691	97.7558	1.159	1.63762	0.5859	11	4.85	315	0	0	0.167954
2015-01-09 05:30:00	7.6135	33.755	292.41	97.6753	1.1224	1.59443	0.5796	11.7	5.55	305	0	0	0.167953
2015-01-09 05:45:00	7.6232	33.755	291.976	97.5619	1.0858	1.55124	0.5922	11.9	5.47	291	0	0	0.167952
2015-01-09 06:00:00	7.6329	33.765	292.32	97.6941	1.0126	1.46487	0.5922	11.2	2.49	290	0	0.335904	0.167952
2015-01-09 06:15:00	7.6183	33.76	292.127	97.6156	1.0004	1.45047	0.5796	11	4.11	294	0	0	0
2015-01-09 06:30:00	7.5989	33.749	291.803	97.4687	1.0614	1.52245	0.5796	10.6	6.75	321	0	0	0.16795
2015-01-09 06:45:00	7.5989	33.739	291.803	97.452	1.0614	1.52245	0.5859	11.6	4.53	292	0	0.335896	0.167948
2015-01-09 07:00:00	7.6038	33.744	292.043	97.5351	1.037	1.49366	0.567	10.8	3.89	304	0	0.335901	0.16795
2015-01-09 07:15:00	7.5844	33.704	292.031	97.4742	1.037	1.49366	0.5544	12.2	4.57	303	0	0	0.335904
2015-01-09 07:30:00	7.5747	33.703	292.322	97.5707	1.1224	1.59443	0.567	11.7	2.91	323	0	0	0.167953
2015-01-09 07:45:00	7.5651	33.693	292.131	97.4581	1.0248	1.47926	0.5544	11.5	3.81	315	0	0.335894	0
2015-01-09 08:00:00	7.5602	33.688	291.996	97.4099	1.2078	1.6952	0.5985	11.6	2.85	293	0	0.335879	0.335879
2015-01-09 08:15:00	7.5602	33.708	292.106	97.438	1.1102	1.58004	0.5481	11.3	2.62	312	13.1646	1.67936	0.839678
2015-01-09 08:30:00	7.5602	33.708	291.907	97.3824	0.9516	1.39289	0.5607	10.1	2.03	330	36.2028	4.87028	2.01529
2015-01-09 08:45:00	7.5651	33.713	291.402	97.2276	0.9272	1.3641	0.5418	10.3	0.18	156	69.1144	9.74084	4.03069
2015-01-09 09:00:00	7.5554	33.712	292.436	97.6565	0.9638	1.40728	0.567	11.2	0.71	232	115.191	16.4581	6.7176
2015-01-09 09:15:00	7.5989	33.729	292.337	97.6237	1.0858	1.55124	0.5796	11.4	1.34	261	227.09	23.6802	10.4126
2015-01-09 09:30:00	7.5796	33.728	292.09	97.509	1.098	1.56564	0.567	11.9	1.77	262	233.673	30.9024	14.4435
2015-01-09 09:45:00	7.5747	33.723	291.888	97.4279	1.0004	1.45047	0.5544	11	2.74	279	273.167	36.7794	18.3057
2015-01-09 10:00:00	7.5892	33.719	292.173	97.5734	0.9638	1.40728	0.5607	10.9	3.04	284	325.825	45.0066	23.5109
2015-01-09 10:15:00	7.6038	33.734	292.137	97.5707	0.9882	1.43608	0.5544	11.8	4.94	301	526.586	60.1182	32.0742
2015-01-09 10:30:00	7.6232	33.725	293.123	97.9155	0.8418	1.26332	0.5481	12.4	3.37	290	589.118	65.995	36.6079
2015-01-09 10:45:00	7.6426	33.726	292.95	97.9216	0.8052	1.22014	0.5607	12.9	4.7	268	602.275	72.8799	42.1495
2015-01-09 11:00:00	7.662	33.727	292.609	97.9027	0.671	1.06178	0.5418	13.1	7.92	296	878.699	91.1747	52.5556
2015-01-09 11:15:00	7.7009	33.729	293.35	98.2119	0.7198	1.11936	0.5544	13.7	6.54	322	674.615	88.6508	54.0635
2015-01-09 11:30:00	7.7204	33.72	293.075	98.1704	0.732	1.13376	0.5796	13.3	6.95	318	687.682	93.0165	57.7576
2015-01-09 11:45:00	7.7643	33.726	293.476	98.3941	0.7076	1.10497	0.5544	13.2	6.62	328	865.301	100.739	62.4581
2015-01-09 12:00:00	7.7986	33.732	293.66	98.54	0.7564	1.16255	0.5544	13.3	6.11	335	957.415	110.477	69.3419
2015-01-09 12:15:00	7.8721	33.73	294.075	98.8263	0.7808	1.19134	0.5418	13.8	4.49	320	1029.8	115.514	72.8677
2015-01-09 12:30:00	7.8869	33.725	294.545	99.0233	0.732	1.13376	0.5481	13.8	6.76	315	1036.38	109.3	58.0919
2015-01-09 12:45:00	7.9066	33.746	295.575	99.4262	0.9028	1.3353	0.5481	13.3	7	308	200.695	66.8157	48.6848
2015-01-09 13:00:00	7.9263	33.746	295.469	99.4551	0.9272	1.3641	0.5544	13.6	4.84	302	180.955	67.9876	50.0255
2015-01-09 13:15:00	7.9312	33.732	296.102	99.6375	0.671	1.06178	0.5481	13.9	7.64	307	990.315	113.816	72.5198
2015-01-09 13:30:00	7.9904	33.753	296.107	99.7821	0.7076	1.10497	0.5481	14.1	5.59	289	970.574	111.636	71.1787
2015-01-09 13:45:00	8.0648	33.749	298.801	100.872	0.7076	1.10497	0.5607	14.3	5.56	272	937.674	107.776	67.8215
2015-01-09 14:00:00	8.04	33.763	299.163	100.982	0.671	1.06178	0.5481	13.8	5.91	296	207.275	103.912	64.1266
2015-01-09 14:15:00	8.0846	33.779	299.589	101.201	0.7198	1.11936	0.5355	14.3	7.12	290	898.169	99.5468	55.2292
2015-01-09 14:30:00	8.1095	33.784	300.911	101.745	0.7808	1.19134	0.5418	14.6	9.38	295	845.47	96.0215	56.9079
2015-01-09 14:45:00	8.1743	33.79	302.902	102.538	0.8296	1.24893	0.5418	15.1	7.61	304	753.314	84.2707	48.8501
2015-01-09 15:00:00	8.2293	33.805	304.198	103.195	0.854	1.27772	0.5544	14.7	7.11	303	720.437	79.4009	44.6525
2015-01-09 15:15:00	8.3449	33.81	305.638	103.843	0.854	1.27772	0.5985	15	5.25	274	671.087	70.0012	37.9383
2015-01-09 15:30:00	8.2594	33.814	305.982	103.952	0.9028	1.3353	0.5796	16.2	4.48	278	575.702	59.7599	31.2229
2015-01-09 15:45:00	8.3197	33.834	303.891	103.246	1.0614	1.52245	0.5733	15.3	5.46	291	411.221	48.5142	24.8446
2015-01-09 16:00:00	8.3247	33.829	305.632	103.883	1.0492	1.50806	0.5481	15.2	3.74	324	351.933	39.2779	19.1354
2015-01-09 16:15:00	8.3903	33.863	306.298	104.246	1.0126	1.46487	0.5733	15.1	3.49	306	358.504	32.394	14.7703
2015-01-09 16:30:00	8.4055	33.877	306.203	104.175	1.1712	1.65202	0.5733	15.2	4.5	308	213.785	20.9803	9.39918
2015-01-09 16:45:00	8.3651	33.8	307.783	104.648	1.0736	1.53685	0.5607	14.4	3.93	313	128.271	14.9379	6.21014
2015-01-09 17:00:00	8.3853	33.819	309.744	105.385	1.098	1.56564	0.567	14.2	6.51	316	69.0705	8.89576	3.86042
2015-01-09 17:15:00	8.4561	33.858	313.673	106.913	0.976	1.42168	0.5607	14.1	5.05	312	26.3153	4.19644	1.67858
2015-01-09 17:30:00	8.4612	33.853	314.107	107.079	1.098	1.56564	0.5733	14.2	4.47	301	6.57968	1.34295	0.671474
2015-01-09 17:45:00	8.4916	33.852	314.263	107.173	0.9882	1.43608	0.5544	14.2	5.76	308	0	0	0.335736
2015-01-09 18:00:00	8.4865	33.857	314.545	107.249	1.0004	1.45047	0.5481	14	5.57	307	0	0	0
2015-01-09 18:15:00	8.4865	33.848	313.441	106.882	1.0248	1.47926	0.5796	13.8	4.93	304	0	0	0.16787
2015-01-09 18:30:00	8.4713	33.853	312.2	106.456	0.9394	1.37849	0.5733	14.1	7.71	308	0	0	0
2015-01-09 18:45:00	8.4916	33.852	312.467	106.549	1.0614	1.52245	0.5796	13.3	3.94	297	0	0	0.335771
2015-01-09 19:00:00	8.4764	33.857	310.269	105.757	0.976	1.42168	0.5481	14.2	2.59	268	0	0.167896	0.335792
2015-01-09 19:15:00	8.4916	33.843	310.154	105.754	1.0858	1.55124	0.5733	14.4	3.48	269	0	0	0.167898
2015-01-09 19:30:00	8.4713	33.853	310.421	105.806	0.976	1.42168	0.5544	13.8	4.12	282	0	0	0.335796
2015-01-09 19:45:00	8.4764	33.848	310.447	105.812	1.0492	1.50806	0.5418	14.6	2.86	272	0	0.167898	0
2015-01-09 20:00:00	8.4865	33.857	311.244	106.135	0.9882	1.43608	0.5544	13.5	3.95	271	0	0	0.335796
2015-01-09 20:15:00	8.4865	33.848	311.546	106.21	1.1102	1.58004	0.5733	14.2	5.11	262	0	0	0
2015-01-09 20:30:00	8.4561	33.848	310.767	105.877	1.037	1.49366	0.5922	13.8	3.32	283	0	0.335801	0
2015-01-09 20:45:00	8.4662	33.838	311.128	106.006	1.1224	1.59443	0.5922	13.2	2.32	10	0	0.167901	0.167901
2015-01-09 21:00:00	8.4865	33.848	311.025	106.038	1.1346	1.60883	0.567	13.9	2.1	322	0	0	0.167905
2015-01-09 21:15:00	8.4713	33.843	310.514	105.796	1.1102	1.58004	0.5859	13.9	2.24	226	0	0	0.335807
2015-01-09 21:30:00	8.4561	33.848	310.783	105.848	0.9882	1.43608	0.5859	15	2.03	234	0	0	0.167902
2015-01-09 21:45:00	8.4257	33.848	309.865	105.49	1.0004	1.45047	0.5859	15.2	1.67	225	0	0	0.167902
2015-01-09 22:00:00	8.4004	33.853	307.738	104.758	1.0126	1.46487	0.567	14.4	2.75	272	0	0.335804	0.335804
2015-01-09 22:15:00	8.4156	33.858	308.41	104.982	1.0858	1.55124	0.5922	14.1	2.46	262	0	0.167899	0.335798
2015-01-09 22:30:00	8.4561	33.838	308.268	105.077	1.098	1.56564	0.5607	13.5	1.43	243	0	0	0.167899
2015-01-09 22:45:00	8.4612	33.853	308.233	105.018	1.4274	1.95433	0.5922	13	1.17	255	0	0	0.167899
2015-01-09 23:00:00	8.4561	33.848	309.342	105.38	1.1224	1.59443	0.5544	13.4	2.25	279	0	0	0.1679
2015-01-09 23:15:00	8.451	33.843	309.411	105.379	1.0492	1.50806	0.567	13	3.07	261	0	0.1679	0.1679
2015-01-09 23:30:00	8.4004	33.834	307.038	104.477	1.098	1.56564	0.6174	13.3	3.96	248	0	0	0.167898
2015-01-09 23:45:00	8.4865	33.809	309.495	105.523	0.8418	1.26332	0.5544	11.4	1.14	308	0	0	0.167898
2015-01-10	8.4865	33.819	310.036	105.673	0.9638	1.40728	0.5733	11.6	0.74	236	0	0	0.167898
2015-01-10 00:15:00	8.4865	33.828	311.176	106.104	0.9272	1.3641	0.5733	12.6	2.08	244	0	0	0.167898
2015-01-10 00:30:00	8.446	33.829	309.701	105.524	0.9272	1.3641	0.5544	13.5	4.08	261	0	0	0
2015-01-10 00:45:00	8.4662	33.838	309.547	105.481	0.9028	1.3353	0.5796	14	4.07	254	0	0	0.167911
2015-01-10 01:00:00	8.451	33.834	309.88	105.606	0.8906	1.32091	0.5607	13.9	3.66	269	0	0.167911	0.167911
2015-01-10 01:15:00	8.4713	33.843	308.972	105.315	0.9028	1.3353	0.5544	13.4	3.12	246	0	0	0
2015-01-10 01:30:00	8.4764	33.838	308.489	105.17	0.915	1.3497	0.6048	13.2	2.9	240	0	0	0.167907
2015-01-10 01:45:00	8.5069	33.838	307.805	105.002	0.976	1.42168	0.5796	13.4	2.28	255	0	0.167903	0.167903
2015-01-10 02:00:00	8.5221	33.814	306.413	104.441	0.9394	1.37849	0.567	13.3	4.27	263	0	0.167898	0.167898
2015-01-10 02:15:00	8.4257	33.819	304.885	103.786	0.9272	1.3641	0.5607	12.4	4.28	279	0	0	0.167898
2015-01-10 02:30:00	8.4865	33.828	304.87	103.695	0.9028	1.3353	0.5544	13	2.52	263	0	0	0.167898
2015-01-10 02:45:00	8.3701	33.805	304.484	103.525	0.9272	1.3641	0.5796	13.1	3.76	263	0	0	0
2015-01-10 03:00:00	8.4409	33.834	302.92	102.957	1.0126	1.46487	0.5922	13.4	3.5	266	0	0	0
2015-01-10 03:15:00	8.36	33.805	302.472	102.832	0.9638	1.40728	0.5859	12.7	3.21	280	0	0	0.167898
2015-01-10 03:30:00	8.3499	33.805	300.799	102.187	1.0126	1.46487	0.6048	12.4	3.21	281	0	0.167899	0.335799
2015-01-10 03:45:00	8.2644	33.781	299.432	101.574	1.037	1.49366	0.5922	13.2	3.03	292	0	0	0.1679
2015-01-10 04:00:00	8.2946	33.8	299.205	101.698	1.0126	1.46487	0.5733	13.6	1.61	303	0	0	0.167903
2015-01-10 04:15:00	8.0003	33.684	299.556	101.196	1.0492	1.50806	0.5859	12.3	0.72	282	0	0	0.167912
2015-01-10 04:30:00	7.8869	33.588	296.313	99.6088	1.0858	1.55124	0.5859	15	4.72	345	0	0	0.33583
2015-01-10 04:45:00	7.9361	33.619	295.014	99.2256	1.098	1.56564	0.5733	14.9	5.01	334	0	0.335835	0.167917
2015-01-10 05:00:00	7.946	33.62	294.254	98.9604	1.1468	1.62322	0.5859	13.8	2.52	322	0	0	0.167906
2015-01-10 05:15:00	7.9164	33.599	294.407	98.9654	1.1224	1.59443	0.5859	14	2.57	268	0	0	0.167904
2015-01-10 05:30:00	7.9164	33.599	295.219	99.2339	1.1102	1.58004	0.5733	14.6	3.31	258	0	0	0.167899
2015-01-10 05:45:00	7.9312	33.624	294.683	99.0802	1.1712	1.65202	0.5796	14.3	3.7	294	0	0	0.167898
2015-01-10 06:00:00	7.9411	33.605	294.468	99.0595	1.1224	1.59443	0.5796	13.9	3.08	304	0	0	0.167899
2015-01-10 06:15:00	7.9559	33.62	294.925	99.2341	1.098	1.56564	0.567	14.2	4.01	269	0	0	0
2015-01-10 06:30:00	7.9312	33.614	295.033	99.2352	1.1224	1.59443	0.5796	12.6	3.37	281	0	0	0.167898
2015-01-10 06:45:00	7.9608	33.625	294.858	99.2134	1.1712	1.65202	0.5733	13.7	3.38	294	0	0	0.167898
2015-01-10 07:00:00	7.9608	33.615	294.175	98.9668	1.2078	1.6952	0.5733	13.7	4.66	313	0	0.167898	0.167898
2015-01-10 07:15:00	7.9559	33.62	293.847	98.8369	1.1956	1.68081	0.5796	14.2	5.69	314	0	0	0.167898
2015-01-10 07:30:00	7.9657	33.62	293.776	98.8893	1.1468	1.62322	0.5733	13.9	4.25	304	0	0	0
2015-01-10 07:45:00	8.0499	33.637	293.416	98.9289	1.0126	1.46487	0.5481	13.3	4.54	304	0	0.167898	0
2015-01-10 08:00:00	8.0648	33.642	292.737	98.7666	0.9028	1.3353	0.5418	13.8	6.35	311	0	0.503694	0.335796
2015-01-10 08:15:00	8.0946	33.652	292.213	98.6377	1.0248	1.47926	0.567	11.8	5.1	272	6.58139	2.01478	0.83949
2015-01-10 08:30:00	8.1294	33.658	290.071	97.961	1.0492	1.50806	0.5607	13.6	4.18	279	26.326	5.20484	2.35057
2015-01-10 08:45:00	8.0996	33.647	291.265	98.3142	0.9882	1.43608	0.5796	12.8	4.57	283	49.3631	10.7455	4.02955
2015-01-10 09:00:00	8.0797	33.647	291.503	98.3834	1.037	1.49366	0.5607	13.1	3.95	256	75.686	17.4614	7.05171
2015-01-10 09:15:00	8.1195	33.658	289.5	97.7667	0.8906	1.32091	0.5733	13.1	4.58	256	253.389	25.0168	10.7455
2015-01-10 09:30:00	8.0946	33.662	292.252	98.6996	1.1224	1.59443	0.5859	13.7	5.73	286	332.375	33.5796	15.4466
2015-01-10 09:45:00	8.1294	33.667	292.782	98.924	1.1346	1.60883	0.6048	13.4	5.15	266	417.925	42.6461	20.4836
2015-01-10 10:00:00	8.1344	33.663	293.547	99.2207	1.0248	1.47926	0.5544	14.7	3.52	260	496.886	51.8805	26.0242
2015-01-10 10:15:00	8.1693	33.678	293.335	99.198	0.9638	1.40728	0.5607	15.2	3.94	255	572.516	60.9471	31.9007
2015-01-10 10:30:00	8.2143	33.673	294.217	99.4739	0.8906	1.32091	0.5796	15.4	5.13	269	648.151	70.0135	38.1129
2015-01-10 10:45:00	8.2143	33.664	294.468	99.6992	0.9028	1.3353	0.567	14.8	4.19	289	707.368	78.5763	44.1572
2015-01-10 11:00:00	8.2544	33.674	294.707	99.8607	0.8174	1.23453	0.567	14.6	3.59	295	766.589	86.4625	49.8628
2015-01-10 11:15:00	8.2644	33.684	294.624	99.8387	0.7808	1.19134	0.567	15.4	3.26	260	812.65	93.0016	55.0623
2015-01-10 11:30:00	8.4004	33.689	294.174	99.773	0.7808	1.19134	0.5733	15.6	2.88	269	858.689	99.3791	60.4332
2015-01-10 11:45:00	8.4409	33.689	294.32	100.076	0.7076	1.10497	0.5859	15.6	5.93	253	898.088	104.749	64.7969
2015-01-10 12:00:00	8.4004	33.698	293.921	99.9632	0.671	1.06178	0.5544	15.8	5.83	276	924.406	109.28	68.8248
2015-01-10 12:15:00	8.4561	33.732	294.299	100.22	0.8052	1.22014	0.5796	15.2	4.41	269	944.085	112.472	71.3444
2015-01-10 12:30:00	8.4865	33.703	293.785	100.107	0.7442	1.14816	0.5733	15.5	4.74	278	957.161	114.317	62.9496
2015-01-10 12:45:00	8.5221	33.688	294.009	100.222	0.6832	1.07618	0.5544	15.2	4.03	282	963.702	115.482	74.1906
2015-01-10 13:00:00	8.5476	33.702	295.194	100.76	0.6344	1.01859	0.567	15.4	3.55	282	963.679	115.142	74.1875
2015-01-10 13:15:00	8.6959	33.724	297.544	101.804	0.61	0.9898	0.5418	16	2.9	270	957.099	114.132	73.3469
2015-01-10 13:30:00	8.6959	33.724	298.439	102.186	0.6466	1.03299	0.5607	16.2	3.27	282	937.365	111.778	71.4973
2015-01-10 13:45:00	8.7782	33.742	300.586	103.011	0.7442	1.14816	0.5544	15.9	4.92	253	911.053	107.405	68.1352
2015-01-10 14:00:00	8.8661	33.706	297.101	102.054	0.671	1.06178	0.5418	15.8	3.71	260	190.762	102.701	64.1039
2015-01-10 14:15:00	8.7937	33.746	298.934	102.469	0.9272	1.3641	0.5733	16.6	4.3	290	838.695	97.3238	47.1517
2015-01-10 14:30:00	8.804	33.803	302.179	103.731	0.9272	1.3641	0.5733	16.9	5	255	799.227	91.6131	55.2028
2015-01-10 14:45:00	8.892	33.739	301.941	103.817	0.9028	1.3353	0.5544	15.6	6.78	298	746.603	84.3971	49.3295
2015-01-10 15:00:00	8.8661	33.735	301.173	103.539	0.7808	1.19134	0.5607	15.7	6.44	303	677.534	76.0068	43.2886
2015-01-10 15:15:00	8.8609	33.797	301.113	103.538	0.915	1.3497	0.5922	15.4	5.89	310	595.309	67.2827	37.081
2015-01-10 15:30:00	8.9076	33.781	300.398	103.403	0.9638	1.40728	0.5733	15.2	4.6	308	536.107	58.7283	31.2099
2015-01-10 15:45:00	8.9492	33.799	300.051	103.373	0.915	1.3497	0.567	15.1	5.14	306	463.749	50.1751	25.5071
2015-01-10 16:00:00	8.9908	33.807	301.644	103.993	0.9882	1.43608	0.5796	15.3	4.85	308	384.813	40.779	20.1378
2015-01-10 16:15:00	9.0431	33.871	299.841	103.569	0.9028	1.3353	0.6174	15.1	6.18	301	299.299	32.3915	15.1049
2015-01-10 16:30:00	9.0692	33.827	300.231	103.741	0.8418	1.26332	0.5796	15.1	7.53	298	226.941	24.169	10.7418
2015-01-10 16:45:00	9.1269	33.801	300.462	103.892	0.8418	1.26332	0.5733	14.9	4.26	287	141.427	16.6163	6.8815
2015-01-10 17:00:00	9.1743	33.842	303.674	105.211	0.915	1.3497	0.6489	14.6	2.08	319	75.648	10.0705	4.0282
2015-01-10 17:15:00	9.3595	33.95	310.15	107.897	0.9638	1.40728	0.6237	13.9	3.38	318	32.8914	4.69991	2.01425
2015-01-10 17:30:00	9.2534	33.937	310.885	107.861	0.976	1.42168	0.6048	14.4	4.23	305	13.1585	1.67868	0.83934
2015-01-10 17:45:00	9.2059	33.907	315.901	109.51	0.8418	1.26332	0.567	14.2	4.61	311	0	0.503609	0.335739
2015-01-10 18:00:00	9.2534	33.937	315.355	109.437	0.8784	1.30651	0.567	12.9	3.73	321	0	0	0.167865
2015-01-10 18:15:00	9.2587	33.894	315.073	109.311	0.915	1.3497	0.5544	13.5	3.34	320	0	0	0.167869
2015-01-10 18:30:00	9.2905	33.883	314.452	109.235	0.8418	1.26332	0.5418	13.6	6.8	322	0	0	0.167874
2015-01-10 18:45:00	9.3064	33.906	313.776	109.008	0.8174	1.23453	0.5544	13.5	6.9	304	0	0.167887	0.167887
2015-01-10 19:00:00	9.317	33.905	314.464	109.294	0.793	1.20574	0.6048	14.1	6.58	309	0	0	0.167896
2015-01-10 19:15:00	9.3436	33.899	314.94	109.478	0.793	1.20574	0.567	13.7	8.1	298	0	0	0.167898
2015-01-10 19:30:00	9.3542	33.908	314.6	109.367	0.793	1.20574	0.5796	13.3	6.55	311	0	0	0.167898
2015-01-10 19:45:00	9.3701	33.893	315.51	109.755	0.7808	1.19134	0.5607	13.5	7.69	312	0	0.167898	0.167898
2015-01-10 20:00:00	9.3701	33.902	315.339	109.702	0.793	1.20574	0.6048	13.2	7.16	296	0	0	0
2015-01-10 20:15:00	9.2693	33.903	316.823	109.918	0.915	1.3497	0.567	12.8	4.9	304	0	0	0.335798
2015-01-10 20:30:00	9.317	33.924	313.636	108.69	0.8906	1.32091	0.6174	12.6	3.3	294	0	0	0.167901
2015-01-10 20:45:00	8.944	33.899	308.484	106.152	1.1224	1.59443	0.6363	12.6	2.71	278	0	0	0.167902
2015-01-10 21:00:00	8.8402	33.903	303.575	104.268	1.0736	1.53685	0.6489	12.6	2.8	276	0	0.167901	0.167901
2015-01-10 21:15:00	8.8143	33.88	302.386	103.794	1.0858	1.55124	0.6111	13.1	2.44	284	0	0	0.167898
2015-01-10 21:30:00	8.9076	33.915	312.372	107.766	1.0614	1.52245	0.6048	13.2	3.33	307	0	0	0.167903
2015-01-10 21:45:00	9.2376	33.924	316.054	109.584	0.8418	1.26332	0.5481	13	2.85	318	0	0	0.167907
2015-01-10 22:00:00	9.2905	33.921	318.053	110.479	0.8784	1.30651	0.5355	13.1	2.92	287	0	0.167909	0.167909
2015-01-10 22:15:00	9.2587	33.904	316.304	109.73	0.9028	1.3353	0.5481	12.7	4.5	292	0	0	0.167919
2015-01-10 22:30:00	9.2481	33.904	315.786	109.61	0.915	1.3497	0.5355	12.7	5.37	289	0	0	0.167921
2015-01-10 22:45:00	9.2323	33.9	313.95	108.853	0.9028	1.3353	0.5292	12.9	6.53	274	0	0	0.167925
2015-01-10 23:00:00	9.148	33.886	308.574	106.706	0.8906	1.32091	0.5733	13.2	6.08	277	0	0	0.167925
2015-01-10 23:15:00	9.1322	33.891	309.974	107.205	0.9882	1.43608	0.567	11	6.49	264	0	0.335848	0
2015-01-10 23:30:00	9.1585	33.904	308.556	106.793	0.854	1.27772	0.5481	10.3	5.13	261	0	0	0
2015-01-10 23:45:00	9.1112	33.902	307.6	106.38	0.9028	1.3353	0.567	10.5	7.08	261	0	0.167926	0
2015-01-11	9.1059	33.897	306.774	106.056	0.9028	1.3353	0.5796	10.6	6.62	270	0	0.335852	0.167926
2015-01-11 00:15:00	9.0535	33.909	305.436	105.479	0.8662	1.29212	0.5922	10.9	4.48	275	0	0.335852	0.335852
2015-01-11 00:30:00	9.0326	33.9	304.652	105.18	1.0004	1.45047	0.5796	10.7	3.31	278	0	0.167926	0.167926
2015-01-11 00:45:00	8.97	33.913	302.519	104.274	1.0614	1.52245	0.6363	10.7	4.58	279	0	0	0.167926
2015-01-11 01:00:00	8.9804	33.893	302.223	104.17	1.1346	1.60883	0.6237	11.5	4.28	290	0	0.335852	0.167926
2015-01-11 01:15:00	9.0378	33.915	302.669	104.439	1.0004	1.45047	0.567	12	5.14	318	0	0	0.167927
2015-01-11 01:30:00	9.064	33.918	303.659	104.883	0.9272	1.3641	0.567	11.9	7.14	315	0	0	0.167928
2015-01-11 01:45:00	9.0222	33.901	302.122	104.296	0.915	1.3497	0.5733	12.4	8.36	322	0	0	0.167926
2015-01-11 02:00:00	9.0222	33.901	300.881	103.857	0.9638	1.40728	0.5859	12.8	5.9	321	0	0	0.167926
2015-01-11 02:15:00	9.064	33.89	301.648	104.215	0.9028	1.3353	0.5922	12.8	6.35	321	0	0	0.167926
2015-01-11 02:30:00	9.0745	33.899	301.971	104.377	0.8906	1.32091	0.5733	12.9	4	309	0	0	0.335852
2015-01-11 02:45:00	9.0797	33.894	302.364	104.498	0.9516	1.39289	0.5733	13	2.63	317	0	0	0.167926
2015-01-11 03:00:00	9.0692	33.894	302.693	104.644	0.976	1.42168	0.567	12.7	4.37	313	0	0.167926	0.167926
2015-01-11 03:15:00	9.0954	33.898	303.962	105.108	0.8906	1.32091	0.5481	12.9	5.95	304	0	0	0.167926
2015-01-11 03:30:00	9.1164	33.897	301.837	104.072	1.0004	1.45047	0.5922	13	7.02	310	0	0	0.335839
2015-01-11 03:45:00	8.9804	33.903	300.578	103.676	0.9516	1.39289	0.5922	12.7	7.26	324	0	0	0.335846
2015-01-11 04:00:00	9.085	33.908	301.402	104.308	0.8784	1.30651	0.5607	12.9	6.72	323	0	0	0.335832
2015-01-11 04:15:00	9.1007	33.883	299.182	103.457	0.854	1.27772	0.5607	13.1	5.04	307	0	0	0.335841
2015-01-11 04:30:00	9.064	33.861	298.852	103.571	0.8662	1.29212	0.5733	12.7	4.43	311	0	0	0.167913
2015-01-11 04:45:00	8.9492	33.885	297.772	102.619	0.9516	1.39289	0.5355	12.3	5.49	287	0	0	0.167914
2015-01-11 05:00:00	8.7731	33.843	296.101	101.992	0.976	1.42168	0.5859	11.7	4.39	282	0	0	0.167913
2015-01-11 05:15:00	9.2006	33.921	296.41	102.752	0.8906	1.32091	0.5481	11.8	3.88	275	0	0.167921	0.167921
2015-01-11 05:30:00	8.9908	33.921	293.517	100.905	0.9882	1.43608	0.5544	12.1	3	257	0	0.167922	0
2015-01-11 05:45:00	9.0954	33.917	294.435	101.838	0.9516	1.39289	0.5607	11.4	3.47	295	0	0	0.167925
2015-01-11 06:00:00	9.1743	33.889	287.713	98.2764	1.0004	1.45047	0.5733	11.5	3.83	293	0	0.335852	0.167926
2015-01-11 06:15:00	8.5374	33.77	286.218	97.6797	0.976	1.42168	0.5796	11.9	3.61	262	0	0.335852	0.167926
2015-01-11 06:30:00	8.5578	33.799	286.57	97.9768	1.0004	1.45047	0.5733	12	2.2	241	0	0	0.335852
2015-01-11 06:45:00	8.8816	33.863	286.993	98.7426	0.915	1.3497	0.5796	11.5	1.52	236	0	0	0.167926
2015-01-11 07:00:00	8.9544	33.861	287.445	99.0664	0.976	1.42168	0.6111	11.3	2.65	268	0	0	0.167926
2015-01-11 07:15:00	8.9596	33.865	287.55	99.1052	0.915	1.3497	0.5607	11.6	4.01	271	0	0	0.167926
2015-01-11 07:30:00	8.9596	33.875	286.238	97.7752	1.342	1.85356	0.6111	12.2	4.8	285	0	0	0.335852
2015-01-11 07:45:00	8.3701	33.689	286.938	97.4765	1.2078	1.6952	0.6048	11.8	3.41	275	0	0	0.167926
2015-01-11 08:00:00	8.3348	33.655	289.124	98.1553	1.1834	1.66641	0.5859	11.8	4.21	274	0	0	0.335852
2015-01-11 08:15:00	8.3651	33.665	289.123	98.2035	1.1468	1.62322	0.5985	11.8	3.33	269	13.1646	1.67926	0.83963
2015-01-11 08:30:00	8.3853	33.674	288.746	98.1233	1.0858	1.55124	0.5796	11.8	3.05	288	26.3293	3.35852	1.51134
2015-01-11 08:45:00	8.4156	33.674	288.226	98.0309	1.098	1.56564	0.5796	11	1.48	300	55.9498	8.06045	3.52645
2015-01-11 09:00:00	8.4156	33.665	288.773	98.2115	1.1102	1.58004	0.6048	11.7	1.87	274	55.9498	8.9001	4.03024
2015-01-11 09:15:00	8.446	33.665	289.255	98.4072	1.0858	1.55124	0.5859	11.5	2.18	275	62.5321	9.90764	4.36608
2015-01-11 09:30:00	8.4206				1.0858	1.55124	0.5796	12.1	5.08	288	134.938	17.6322	8.06045
2015-01-11 09:45:00	8.4358	33.732	287.433	97.8295	1.1224	1.59443	0.5985	11.1	2.82	322	167.849	18.9757	8.90009
2015-01-11 10:00:00	8.4561	33.742	287.539	97.9245	1.0614	1.52245	0.5922	11.4	1.65	280	55.9498	10.0756	5.03779
2015-01-11 10:15:00	8.4865	33.751	287.261	97.888	1.0248	1.47926	0.567	12.6	1.5	231	69.1144	17.9681	10.0756
2015-01-11 10:30:00	8.4916	33.756	286.53	97.6202	0.9516	1.39289	0.5733	12.3	3.49	290	134.934	21.4946	11.7548
2015-01-11 10:45:00	8.5323	33.756	286.178	97.6153	1.1346	1.60883	0.5985	13.8	10.41	306	181.009	38.9589	23.3417
2015-01-11 11:00:00	8.6651	33.802	286.562	98.1751	1.22	1.7096	0.6237	13.4	6.8	305	332.407	66.4979	40.1338
2015-01-11 11:15:00	8.8557	33.831	286.971	98.6396	1.1224	1.59443	0.5733	13.2	3.5	288	358.735	74.7194	46.5107
2015-01-11 11:30:00	8.8816	33.844	286.802	98.7694	0.9028	1.3353	0.63	13.7	3.3	288	615.417	84.7897	51.2096
2015-01-11 11:45:00	8.9752	33.888	286.666	98.8603	1.0004	1.45047	0.6489	14.4	11.01	319	417.918	74.8826	48.1868
2015-01-11 12:00:00	8.8299	33.836	287.034	98.7336	0.8296	1.24893	0.63	13.7	11.7	322	1102.31	121.56	73.0368
2015-01-11 12:15:00	8.8195	33.836	287.486	98.7557	0.9394	1.37849	0.9702	13.8	12.49	311	1029.82	116.69	71.1891
2015-01-11 12:30:00	8.9856	33.85	287.389	98.8426	1.1102	1.58004	0.9135	13.5	9.24	299	562.605	89.1539	57.7569
2015-01-11 12:45:00	8.892	33.882	286.715	98.6504	0.8052	1.22014	0.8505	13.6	9.77	319	628.406	118.536	73.5393
2015-01-11 13:00:00	9.2059	33.944	286.736	99.0138	0.9394	1.37849	0.8757	13.3	6.88	308	486.932	83.6132	55.4063
2015-01-11 13:15:00	9.2006	33.921	288.046	99.76	0.9882	1.43608	1.0395	13.3	8.81	304	273.077	67.1592	46.3398
2015-01-11 13:30:00	9.0692	34.065	287.435	99.6085	0.976	1.42168	1.0773	13	5.9	292	615.245	93.3513	59.7717
2015-01-11 13:45:00	9.148	33.876	288.872	100.028	0.793	1.20574	1.1088	13.3	5.66	294	885.032	105.44	64.9765
2015-01-11 14:00:00	9.2217	33.92	289.166	99.9336	0.8662	1.29212	0.945	13.3	7.12	325	325.718	77.9047	50.7052
2015-01-11 14:15:00	9.2112	33.911	290.271	100.642	0.9394	1.37849	0.9891	13.1	6.72	331	549.444	82.7737	47.0114
2015-01-11 14:30:00	9.2799	33.959	291.417	101.232	0.915	1.3497	1.0143	13.2	8.04	344	838.971	93.3513	54.7347
2015-01-11 14:45:00	9.2958	33.925	293.655	101.998	0.9516	1.39289	0.9765	12.6	8.57	322	263.207	67.1592	41.6387
2015-01-11 15:00:00	9.2905	33.978	292.919	101.344	0.8906	1.32091	1.0269	12.8	7.65	335	707.368	78.9121	43.9893
2015-01-11 15:15:00	9.3329	33.956	295.622	102.768	0.9516	1.39289	1.2348	12.7	6.52	324	648.146	69.8456	37.6091
2015-01-11 15:30:00	9.2112	33.901	294.406	102.702	0.9516	1.39289	1.9026	12.6	9.08	298	549.444	59.6038	30.8932
2015-01-11 15:45:00	9.4021	33.938	298.477	103.804	0.976	1.42168	1.4616	12.3	9.63	297	424.421	49.8657	25.1847
2015-01-11 16:00:00	9.1585	33.876	300.195	103.738	0.9272	1.3641	0.8946	12.2	11.02	322	378.36	41.4708	19.9799
2015-01-11 16:15:00	9.2481	33.885	302.193	104.848	0.9516	1.39289	1.323	12	9.15	310	266.497	31.3969	14.4392
2015-01-11 16:30:00	9.1374	33.877	302.471	104.961	0.9882	1.43608	1.1088	12.1	8.13	307	207.275	23.5057	10.4097
2015-01-11 16:45:00	9.0745	33.851	304.397	105.072	0.9028	1.3353	0.8757	11.8	9.65	294	115.153	16.6219	6.88382
2015-01-11 17:00:00	8.9961	33.754	305.666	105.264	0.8662	1.29212	0.7182	11.5	10.17	302	62.5116	10.4097	4.02955
2015-01-11 17:15:00	8.97	33.789	307.831	106.091	0.9394	1.37849	0.7119	11.3	6.52	294	32.9023	5.03698	2.35059
2015-01-11 17:30:00	9.0588	33.828	308.143	106.344	0.9638	1.40728	0.7371	10.9	5.33	305	13.1619	1.67902	0.839511
2015-01-11 17:45:00	9.064	33.832	308.245	106.481	0.9516	1.39289	0.8001	10.6	6.4	296	0	0.5037	0.3358
2015-01-11 18:00:00	9.0326	33.843	308.914	106.784	0.9394	1.37849	0.8883	10.4	6.59	300	0	0	0.167903
2015-01-11 18:15:00	9.0222	33.825	308.518	106.469	0.976	1.42168	0.8127	10.3	7.35	289	0	0	0.335844
2015-01-11 18:30:00	8.9648	33.822	308.927	106.429	0.9516	1.39289	0.693	10.2	4.43	306	0	0	0.335851
2015-01-11 18:45:00	8.8868	33.83	307.917	105.997	1.0126	1.46487	0.7308	10.1	5.74	298	0	0.167926	0.167926
2015-01-11 19:00:00	8.9232	33.833	306.381	105.393	0.9882	1.43608	0.7182	10.2	6.12	297	0	0	0.335865
2015-01-11 19:15:00	8.918	33.838	306.965	105.699	0.9882	1.43608	0.7497	10.2	7.29	293	0	0	0.335888
2015-01-11 19:30:00	8.8972	33.848	306.846	105.721	0.9882	1.43608	0.8253	10	5.31	308	0	0	0.3359
2015-01-11 19:45:00	8.8764	33.868	305.157	104.939	0.9638	1.40728	0.8316	10	7.69	301	0	0	0.335908
2015-01-11 20:00:00	8.8661	33.878	304.701	104.778	0.9638	1.40728	0.7623	9.9	6.32	320	0	0	0.167954
2015-01-11 20:15:00	8.9388	33.885	302.982	104.37	0.9638	1.40728	1.0395	9.8	4.4	315	0	0	0.167957
2015-01-11 20:30:00	9.0065	33.916	296.559	102.386	1.0248	1.47926	1.5435	9.6	7.36	310	0	0	0.167956
2015-01-11 20:45:00	8.8868	33.83	300.033	103.428	0.9638	1.40728	0.9576	9.5	7.49	311	0	0	0.167963
2015-01-11 21:00:00	8.835	33.869	299.693	103.447	0.9882	1.43608	1.3734	9.4	6.08	308	0	0	0.335928
2015-01-11 21:15:00	8.835	33.841	297.9	102.47	0.9394	1.37849	1.0017	9.3	9.74	319	0	0	0.167975
2015-01-11 21:30:00	8.9284	33.971	299.133	102.749	0.9638	1.40728	1.0206	9.2	7.61	307	0	0.167973	0.335946
2015-01-11 21:45:00	8.6446	33.831	298.497	102.164	0.9516	1.39289	0.8064	8.9	7.51	303	0	0	0.167977
2015-01-11 22:00:00	8.5986	33.798	296.388	101.203	0.9638	1.40728	0.7812	8.8	4.63	300	0	0	0.167979
2015-01-11 22:15:00	8.5476	33.808	294.956	100.699	0.9272	1.3641	0.8568	8.7	7.05	299	0	0.167982	0.335964
2015-01-11 22:30:00	8.5425	33.804	294.336	100.517	0.9882	1.43608	0.8946	8.7	5.09	295	0	0	0.167983
2015-01-11 22:45:00	8.5425	33.842	293.311	100.138	0.9516	1.39289	0.8316	8.6	5.7	290	0	0	0.167983
2015-01-11 23:00:00	8.517	33.828	293.516	100.134	0.9394	1.37849	0.8001	8.6	6.64	288	0	0.335965	0.335965
2015-01-11 23:15:00	8.5425	33.842	293.695	100.226	0.854	1.27772	0.756	8.6	8.5	291	0	0	0.167983
2015-01-11 23:30:00	8.5119	33.843	292.596	99.7975	0.9028	1.3353	0.7308	8.5	5.93	279	0	0	0.335965
2015-01-11 23:45:00	8.4764	33.838	290.704	99.0957	0.9394	1.37849	0.7434	8.3	6.49	281	0	0	0.335965
2015-01-12	8.4815	33.843	291.435	99.3162	0.9272	1.3641	0.7308	8.2	5.91	275	0	0.167983	0.335965
2015-01-12 00:15:00	8.4764	33.838	292.05	99.5331	0.9028	1.3353	0.6993	8.1	4.9	288	0	0	0.335965
2015-01-12 00:30:00	8.4561	33.848	291.103	99.1644	0.915	1.3497	0.6993	7.9	5.61	279	0	0	0.167983
2015-01-12 00:45:00	8.4206	33.853	287.687	97.9402	0.8662	1.29212	0.693	7.7	4.83	270	0	0	0.167983
2015-01-12 01:00:00	8.4105	33.834	289.449	98.4859	0.9272	1.3641	0.7056	7.8	5.84	297	0	0	0.167983
2015-01-12 01:15:00	8.3147	33.829	285.823	97.0647	1.0004	1.45047	0.6678	7.7	5.96	296	0	0	0.167983
2015-01-12 01:30:00	8.3449	33.839	286.286	97.2624	0.915	1.3497	0.6993	7.8	6.47	319	0	0	0.335965
2015-01-12 01:45:00	8.3298	33.844	286.122	97.1994	0.9394	1.37849	0.7119	8	7.41	317	0	0	0.167983
2015-01-12 02:00:00	8.3247	33.849	286.989	97.4991	0.8784	1.30651	0.7434	7.8	6.5	293	0	0	0
2015-01-12 02:15:00	8.3147	33.849	285.697	97.0301	0.8662	1.29212	0.6993	7.7	6.59	291	0	0	0.167983
2015-01-12 02:30:00	8.2946	33.868	284.181	96.5165	0.8784	1.30651	0.6993	7.8	6.26	296	0	0	0.335965
2015-01-12 02:45:00	8.3399	33.873	282.749	96.1039	0.8906	1.32091	0.8379	7.9	5.03	312	0	0	0
2015-01-12 03:00:00	8.3247	33.878	282.156	95.7406	0.8418	1.26332	0.8064	8	7.74	306	0	0	0.167983
2015-01-12 03:15:00	8.2143	33.848	282.312	95.6543	0.793	1.20574	0.6993	7.9	8	318	0	0	0
2015-01-12 03:30:00	8.1843	33.838	281.673	95.3314	0.793	1.20574	0.6426	8	4.49	296	0	0	0.335965
2015-01-12 03:45:00	8.0996	33.852	279.98	94.6424	0.8662	1.29212	0.6237	7.7	3.13	232	0	0.167983	0
2015-01-12 04:00:00	8.0996	33.862	278.856	94.2479	0.9638	1.40728	0.6552	7.9	6.04	293	0	0.167983	0.335965
2015-01-12 04:15:00	8.1244	33.867	280.082	94.7269	0.8174	1.23453	0.6741	7.4	2.27	240	0	0.167983	0.167983
2015-01-12 04:30:00	8.1344	33.867	279.3	94.4816	0.8174	1.23453	0.7371	7.6	4.32	262	0	0.167983	0.167983
2015-01-12 04:45:00	8.0201	33.861	277.59	93.6475	0.9882	1.43608	0.6426	7.1	4.54	269	0	0.167983	0
2015-01-12 05:00:00	8.04	33.841	276.703	93.3375	0.9394	1.37849	0.6615	7.1	5.33	270	0	0.167983	0.335965
2015-01-12 05:15:00	8.0053	33.836	277.111	93.463	1.0614	1.52245	0.7119	6.9	4.22	268	0	0.167983	0.335965
2015-01-12 05:30:00	7.9904	33.801	276.628	93.2085	1.0614	1.52245	0.6993	6.8	3.88	282	0	0	0.167984
2015-01-12 05:45:00	7.9559	33.806	276.166	93.0061	1.037	1.49366	0.7056	6.6	3.49	285	0	0	0.167988
2015-01-12 06:00:00	7.9263	33.785	276.348	92.9845	1.0248	1.47926	0.6615	7	2.15	273	0	0	0.335981
2015-01-12 06:15:00	7.9164	33.795	276.551	93.0408	1.098	1.56564	0.7056	7	2.04	266	0	0	0.336003
2015-01-12 06:30:00	7.9164	33.805	275.36	92.6482	1.159	1.63762	0.7056	6.9	0.96	205	0	0	0.168002
2015-01-12 06:45:00	7.9066	33.804	276.298	92.9462	1.1712	1.65202	0.6678	6.3	0.68	214	0	0	0.336035
2015-01-12 07:00:00	7.9016	33.799	275.824	92.778	1.22	1.7096	0.6615	7.6	3.06	261	0	0	0.33606
2015-01-12 07:15:00	8.0251	33.758	282.676	95.3265	1.2688	1.76718	0.7245	6.8	0.64	213	0	0	0.336065
2015-01-12 07:30:00	8.0251	33.768	281.567	94.8975	1.159	1.63762	0.7749	6.4	0.33	262	0	0	0.336072
2015-01-12 07:45:00	8.0449	33.749	284.085	95.807	1.0858	1.55124	0.8001	6.1	1.29	18	0	0	0.168025
2015-01-12 08:00:00	8.035	33.758	283.828	95.7257	1.0736	1.53685	0.819	6.3	1	85	0	0.168023	0.336047
2015-01-12 08:15:00	8.0499	33.754	284.553	95.9781	1.0736	1.53685	0.819	5.4	0.5	116	13.169	2.35242	0.840151
2015-01-12 08:30:00	8.0548	33.739	283.477	95.5956	1.1712	1.65202	0.8505	5.7	1.14	107	36.2147	5.88123	2.35249
2015-01-12 08:45:00	8.0548	33.739	284.805	96.0848	0.9638	1.40728	0.8505	5.2	0.96	173	62.5527	11.0905	4.36898
2015-01-12 09:00:00	7.946	33.756	277.133	93.2043	1.2932	1.79598	0.7623	5.4	0.66	142	82.3062	17.476	7.39371
2015-01-12 09:15:00	7.8869	33.784	277.042	93.1203	1.1834	1.66641	0.7308	6.3	0.72	280	260.088	26.2141	11.4267
2015-01-12 09:30:00	7.8721	33.789	275.403	92.502	0.915	1.3497	0.693	5.1	2.42	334	345.686	34.9521	15.9637
2015-01-12 09:45:00	7.9509	33.761	280.968	94.5484	1.0614	1.52245	0.7875	5.4	0.94	247	424.7	43.8574	21.1726
2015-01-12 10:00:00	7.9756	33.757	283.768	95.5395	1.0004	1.45047	0.8127	5.3	0.86	324	510.298	53.097	26.8846
2015-01-12 10:15:00	7.9756	33.757	282.843	95.2585	0.9638	1.40728	0.7812	5.8	1.19	300	589.278	62.672	33.2683
2015-01-12 10:30:00	7.9756	33.767	284.421	95.8196	0.9272	1.3641	0.7686	6.4	0.88	8	661.593	71.7306	39.3091
2015-01-12 10:45:00	7.9806	33.752	286.069	96.3552	0.793	1.20574	0.8379	7.3	0.31	1	727.367	80.4639	45.6914
2015-01-12 11:00:00	7.9855	33.748	286.293	96.4933	0.7076	1.10497	0.7497	6.9	1.1	352	783.299	88.3527	51.7351
2015-01-12 11:15:00	8.1344	33.828	285.273	96.7484	0.6954	1.09057	0.756	7.3	1.99	286	835.956	95.7271	57.6042
2015-01-12 11:30:00	8.0499	33.832	285.276	96.6888	0.61	0.9898	0.7182	8.5	0.93	272	872.159	100.925	62.3014
2015-01-12 11:45:00	8.2594	33.931	284.193	97.0172	0.7442	1.14816	0.756	8.8	1.67	281	911.58	106.285	66.8272
2015-01-12 12:00:00	8.446	33.906	287.419	97.881	0.7442	1.14816	0.756	9	2.49	275	944.33	111.486	70.8542
2015-01-12 12:15:00	8.8505				0.915	1.3497	0.8631	9.2	2.01	270	964.001	114.842	73.8752
2015-01-12 12:30:00	8.66				0.8296	1.24893	0.8253	9.3	1.54	307	970.575	116.174	75.211
2015-01-12 12:45:00	8.7524				0.793	1.20574	0.8442	9.5	1.83	309	727.074	117.845	76.2134
2015-01-12 13:00:00	8.4257	33.868	284.491	98.7109	0.6344	1.01859	0.9513	9.3	1.58	320	983.629	117.509	76.3808
2015-01-12 13:15:00	8.3247	33.742	288.329	98.344	0.6344	1.01859	0.7812	9.3	1.11	309	970.442	115.828	75.2041
2015-01-12 13:30:00	8.7988	34.134	290.867	100.456	0.5612	0.932216	0.7686	9.5	1.49	2	950.699	113.144	73.1911
2015-01-12 13:45:00	8.446	33.732	291.078	99.5006	0.549	0.91782	0.8316	9.9	1.2	29	924.233	109.277	70.5015
2015-01-12 14:00:00	9.0013				0.549	0.91782	0.819	9.5	1.48	357	598.6	105.406	66.6339
2015-01-12 14:15:00	8.4662	33.713	288.471	98.2276	0.5368	0.903424	0.756	9.4	0.97	5	858.429	100.024	48.6693
2015-01-12 14:30:00	9.2059				0.732	1.13376	0.8946	11.3	1.7	143	805.805	92.8014	56.7213
2015-01-12 14:45:00	9.1637				0.9882	1.43608	0.945	10.8	1.47	186	759.759	86.0851	51.0134
2015-01-12 15:00:00	8.8972				0.5856	0.961008	0.8694	11.2	1.11	100	700.557	78.0329	45.3094
2015-01-12 15:15:00	9.1901				0.6954	1.09057	0.8064	11.1	1.23	159	634.777	69.4747	38.9327
2015-01-12 15:30:00	9.4876				0.8784	1.30651	0.8883	11.2	2.64	142	562.419	61.0898	33.0623
2015-01-12 15:45:00	9.0483				0.7808	1.19134	0.7056	11.4	0.97	147	483.483	51.5269	26.8544
2015-01-12 16:00:00	8.8972				0.8296	1.24893	0.7245	11.3	0.79	142	404.547	42.9674	21.148
2015-01-12 16:15:00	8.517	33.867	297.049	101.815	0.7198	1.11936	0.7056	11.3	0.97	158	319.033	33.5683	16.1128
2015-01-12 16:30:00	8.6805	34.027	285.565	98.1059	0.732	1.13376	0.7623	11.5	1.79	189	240.097	25.1766	11.4134
2015-01-12 16:45:00	8.7267	34.156	289.011	99.4044	0.7564	1.16255	0.7308	11.1	1.12	162	154.583	17.7914	7.3851
2015-01-12 17:00:00	8.7164	34.07	289.294	99.3509	0.7564	1.16255	0.7434	11.2	0.66	166	82.2277	10.9104	4.36417
2015-01-12 17:15:00	8.6497	33.913	291.048	99.7703	0.793	1.20574	0.7686	9.5	0.42	220	36.1821	5.3716	2.35007
2015-01-12 17:30:00	8.6805	34.037	297.261	103.279	1.0248	1.47926	0.8379	8.9	0.21	176	13.1575	2.01436	1.00718
2015-01-12 17:45:00	8.6497	34.105	301.266	104.485	0.8052	1.22014	0.756	9.2	0.6	177	0	0	0.335733
2015-01-12 18:00:00	8.5374	33.944	298.992	101.933	0.7686	1.17695	0.6552	9	0.39	97	0	0	0.167869
2015-01-12 18:15:00	8.66	33.999	302.078	104.393	0.8784	1.30651	0.7371	7.8	0.23	297	0	0.167869	0.335737
2015-01-12 18:30:00	8.3752	33.723	299.909	102.419	0.8174	1.23453	0.6804	7.5	0.58	276	0	0	0.335749
2015-01-12 18:45:00	8.2845	33.752	296.116	100.485	0.793	1.20574	0.6678	6.8	0.46	210	0	0	0.167895
2015-01-12 19:00:00	8.3046	33.761	301.37	102.19	0.7808	1.19134	0.693	6.7	0.21	225	0	0	0.1679
2015-01-12 19:15:00	8.2394	33.717	296.503	100.481	0.854	1.27772	0.6867	6.5	0.36	200	0	0	0.16791
2015-01-12 19:30:00	8.2193	33.727	300.383	101.865	0.8296	1.24893	0.6678	6.6	0.42	196	0	0	0.335849
2015-01-12 19:45:00	8.2343	33.761	300.616	101.938	0.7686	1.17695	0.6678	6.3	0.68	246	0	0	0.167949
2015-01-12 20:00:00	8.2594	33.747	302.857	102.701	0.7808	1.19134	0.7308	6.3	0.54	254	0	0	0.335949
2015-01-12 20:15:00	8.3247	33.761	306.09	103.897	0.915	1.3497	0.6741	6.2	0.9	208	0	0	0.167982
2015-01-12 20:30:00	8.3247	33.761	305.924	103.819	0.8906	1.32091	0.7119	6.4	0.47	248	0	0	0.167982
2015-01-12 20:45:00	8.3147	33.761	306.559	104.031	0.8418	1.26332	0.6741	5.4	0.93	242	0	0.167983	0.167983
2015-01-12 21:00:00	8.2996	33.756	306.189	103.897	0.793	1.20574	0.6741	6.2	1.14	313	0	0	0.167983
2015-01-12 21:15:00	8.3046	33.771	306.705	104.077	0.8174	1.23453	0.693	6.1	1.41	249	0	0	0.168014
2015-01-12 21:30:00	8.2946	33.771	306.724	104.057	0.7808	1.19134	0.6804	6.4	1.4	317	0	0	0.168027
2015-01-12 21:45:00	8.2845	33.761	306.618	104.029	0.8052	1.22014	0.7119	6.1	2.87	325	0	0	0.168034
2015-01-12 22:00:00	8.2845	33.771	304.943	103.434	0.8906	1.32091	0.7056	5.5	1.44	294	0	0	0.168029
2015-01-12 22:15:00	8.2946	33.771	301.421	102.273	0.8418	1.26332	0.7308	5.4	1.68	295	0	0	0
2015-01-12 22:30:00	8.2795	33.766	301.22	102.124	0.8418	1.26332	0.7497	5.5	1.28	322	0	0	0.336063
2015-01-12 22:45:00	8.2644	33.771	298.959	101.361	0.8784	1.30651	0.7308	5.8	1.87	272	0	0	0.336065
2015-01-12 23:00:00	8.2444	33.761	299.484	101.456	0.8906	1.32091	0.7308	5.9	1.28	299	0	0	0.33607
2015-01-12 23:15:00	8.0797	33.608	298.404	100.848	0.854	1.27772	0.7623	6	1.65	265	0	0.168039	0
2015-01-12 23:30:00	8.0996	33.638	297.386	100.545	0.9272	1.3641	0.7245	6.1	2.09	268	0	0	0.336078
2015-01-12 23:45:00	8.1294	33.687	298.998	101.057	0.8662	1.29212	0.7056	6.2	2.08	294	0	0	0.168039
2015-01-13	8.0449	33.651	296.063	99.7077	0.8662	1.29212	0.7434	6.3	1.65	253	0	0.168039	0.336078
2015-01-13 00:15:00	8.0548	33.661	294.576	99.299	0.915	1.3497	0.7812	7.5	1.26	342	0	0	0.168038
2015-01-13 00:30:00	8.0797	33.657	296.754	100.095	0.9272	1.3641	0.8001	8	4.17	12	0	0.168031	0.168031
2015-01-13 00:45:00	8.0499	33.686	297.562	100.333	0.8052	1.22014	0.7371	8.2	3.61	358	0	0	0.168025
2015-01-13 01:00:00	7.9608	33.683	298.118	100.355	0.9394	1.37849	0.7182	8.6	0.95	331	0	0	0.336057
2015-01-13 01:15:00	8.0003	33.675	298.289	100.527	0.8906	1.32091	0.7623	7.7	2.67	332	0	0	0.336057
2015-01-13 01:30:00	8.0053	33.689	298.942	100.669	0.8174	1.23453	0.7245	8.3	2.57	6	0	0.16802	0.16802
2015-01-13 01:45:00	7.9263	33.687	296.878	99.8625	0.7808	1.19134	0.7182	7.8	0.77	188	0	0	0.168007
2015-01-13 02:00:00	7.9707	33.664	296.949	99.8799	0.8418	1.26332	0.693	8.6	1.8	63	0	0	0.167994
2015-01-13 02:15:00	7.9066	33.628	296.026	99.4647	0.8174	1.23453	0.6867	8.9	2.5	62	0	0	0.335976
2015-01-13 02:30:00	7.9016	33.643	295.273	99.2183	0.8418	1.26332	0.7056	8.7	0.48	257	0	0	0.33597
2015-01-13 02:45:00	7.9411	33.654	294.159	98.957	0.8052	1.22014	0.7371	8.5	1.77	1	0	0	0.335966
2015-01-13 03:00:00	7.946	33.649	293.454	98.6527	0.854	1.27772	0.693	8.4	2.62	14	0	0	0.335965
2015-01-13 03:15:00	7.8869	33.628	292.767	98.322	0.8174	1.23453	0.6804	8.9	1.83	70	0	0.167983	0.335965
2015-01-13 03:30:00	7.8869	33.618	292.161	98.0164	0.8662	1.29212	0.6867	8.8	3.53	73	0	0	0.167983
2015-01-13 03:45:00	7.8869	33.608	292.835	98.3254	0.8296	1.24893	0.6804	9	4.74	62	0	0	0.167983
2015-01-13 04:00:00	7.877	33.598	292.682	98.2201	0.8418	1.26332	0.6867	7.9	1.01	298	0	0	0.167983
2015-01-13 04:15:00	7.828	33.577	292.196	97.9586	0.8296	1.24893	0.6993	8.3	1.8	14	0	0.167983	0.167983
2015-01-13 04:30:00	7.8672	33.588	292.203	98.0522	0.8174	1.23453	0.6867	8.7	2.43	8	0	0	0.335965
2015-01-13 04:45:00	7.9312	33.604	295.418	99.3014	0.8662	1.29212	0.6867	8	2.4	3	0	0.167983	0.335965
2015-01-13 05:00:00	7.877	33.598	293.104	98.4132	0.8418	1.26332	0.6993	7.9	0.88	174	0	0	0.335965
2015-01-13 05:15:00	7.8918	33.603	294.011	98.7528	0.854	1.27772	0.6678	8.6	5.1	68	0	0	0.167983
2015-01-13 05:30:00	7.9066	33.628	295.493	99.3096	0.8296	1.24893	0.6741	8.5	4.23	11	0	0	0.167983
2015-01-13 05:45:00	7.9066	33.609	295.426	99.2425	0.915	1.3497	0.6678	7.9	1.64	32	0	0.167983	0.167983
2015-01-13 06:00:00	7.8967	33.599	295.625	99.2815	0.8662	1.29212	0.6678	7.9	1.24	201	0	0	0.167983
2015-01-13 06:15:00	7.882	33.583	293.798	98.6258	0.9272	1.3641	0.6804	8.1	1.98	14	0	0.167983	0.167983
2015-01-13 06:30:00	7.8623	33.583	292.228	98.0564	0.8662	1.29212	0.6867	8	1.49	13	0	0	0.167983
2015-01-13 06:45:00	7.8525	33.602	293.793	98.5951	0.8784	1.30651	0.6867	7.9	3.04	344	0	0	0.167983
2015-01-13 07:00:00	7.8525	33.592	294.519	98.8316	0.8662	1.29212	0.7056	8	1.15	334	0	0	0.167983
2015-01-13 07:15:00	7.779	33.575	292.312	97.9211	0.854	1.27772	0.6741	7.8	2.38	7	0	0	0.167983
2015-01-13 07:30:00	7.8378	33.626	292.971	98.2802	0.9638	1.40728	0.6993	8	3.15	5	0	0	0.335965
2015-01-13 07:45:00	7.7692	33.574	290.201	97.1915	0.854	1.27772	0.6741	8.2	2.6	30	0	0	0.335965
2015-01-13 08:00:00	7.7643	33.559	289.543	96.8784	0.8418	1.26332	0.6993	8.2	0.11	61	0	0.335965	0.335965
2015-01-13 08:15:00	7.828	33.586	292.883	98.2473	0.8784	1.30651	0.6741	8.5	3.16	16	6.58236	1.17588	0.67193
2015-01-13 08:30:00	7.8181	33.586	295.796	99.2677	0.854	1.27772	0.6552	8.8	2.63	8	19.7477	3.52763	1.51184
2015-01-13 08:45:00	7.8132	33.581	295.08	98.9075	0.793	1.20574	0.6552	8.8	3.03	11	42.7863	6.38334	3.02369
2015-01-13 09:00:00	7.779	33.604	299.069	100.172	0.793	1.20574	0.6552	8.8	2.06	26	72.4063	10.079	4.03158
2015-01-13 09:15:00	7.7888	33.605	299.333	100.369	0.7564	1.16255	0.6426	8.9	2.19	3	102.027	15.4544	6.88728
2015-01-13 09:30:00	7.8084	33.674	298.738	100.344	0.8174	1.23453	0.6552	9	1.12	12	181.02	24.8614	11.5908
2015-01-13 09:45:00	7.9263	33.648	300.277	100.954	0.7808	1.19134	0.6615	8.9	2.28	10	227.092	32.0847	15.7904
2015-01-13 10:00:00	7.9164	33.668	301.125	101.197	0.7808	1.19134	0.6615	9.1	2.29	9	227.091	36.4522	19.318
2015-01-13 10:15:00	7.9263	33.648	303.498	102.024	0.854	1.27772	0.6489	9.3	2.21	340	355.446	47.0351	25.5333
2015-01-13 10:30:00	7.9066	33.658	302.045	101.499	0.854	1.27772	0.63	9.3	2.18	2	510.131	58.7939	32.5886
2015-01-13 10:45:00	7.8967	33.657	304.18	102.259	0.9516	1.39289	0.63	9.9	3.93	36	622.03	68.8728	39.1399
2015-01-13 11:00:00	7.9263	33.658	302.524	101.714	0.671	1.06178	0.6237	10.3	1.14	110	694.436	77.7751	45.3548
2015-01-13 11:15:00	7.9213	33.653	300.856	101.161	0.793	1.20574	0.6552	10.9	3.69	50	747.095	84.4822	50.5549
2015-01-13 11:30:00	7.9263	33.687	300.239	101.031	0.6954	1.09057	0.63	11.1	2.69	42	806.336	90.8544	55.4195
2015-01-13 11:45:00	7.9806	33.694	300.001	101.096	0.7076	1.10497	0.63	11.1	3.55	52	937.95	102.602	62.8038
2015-01-13 12:00:00	8.0053	33.689	299.625	101.039	0.7076	1.10497	0.6111	11.6	4.2	54	1030.01	110.648	68.1687
2015-01-13 12:15:00	8.04	33.666	297.137	100.186	0.7198	1.11936	0.6111	11.6	4.29	63	996.953	107.96	67.8315
2015-01-13 12:30:00	8.0697	33.657	296.077	99.8976	0.7808	1.19134	0.63	11.7	4.49	59	684.341	94.3587	62.4581
2015-01-13 12:45:00	8.1344	33.779	295.617	100.206	0.7198	1.11936	0.6363	11.9	4.1	63	865.292	108.963	70.3473
2015-01-13 13:00:00	8.1444	33.682	298.302	100.899	0.5612	0.932216	0.5922	12	3.52	60	924.513	108.11	70.5066
2015-01-13 13:15:00	8.1743	33.712	298.009	100.885	0.5124	0.874632	0.6111	12.4	3.04	68	858.683	102.737	67.148
2015-01-13 13:30:00	8.2193	33.707	299.324	101.443	0.5246	0.889028	0.5922	12.6	3.82	67	865.188	102.736	66.8122
2015-01-13 13:45:00	8.2193	33.698	299.241	101.392	0.5246	0.889028	0.6237	12.9	3.33	53	858.603	101.728	65.4688
2015-01-13 14:00:00	8.2394	33.698	298.759	101.369	0.5856	0.961008	0.6363	12.7	2.41	80	592.174	98.2022	62.6144
2015-01-13 14:15:00	8.2394	33.737	302.876	102.662	0.7198	1.11936	0.6426	12.5	3.23	64	819.162	95.5177	50.3608
2015-01-13 14:30:00	8.3046	33.684	297.795	101.099	0.6466	1.03299	0.6174	13.1	3.68	86	812.521	89.4745	54.3898
2015-01-13 14:45:00	8.3197	33.689	299.449	101.548	0.793	1.20574	0.6174	13.3	4.73	83	819.024	84.2648	49.686
2015-01-13 15:00:00	8.3449	33.752	302.179	102.65	0.6222	1.0042	0.6426	13.3	4.62	63	726.875	76.5385	43.9761
2015-01-13 15:15:00	8.4257	33.848	296.58	101.154	0.6954	1.09057	0.6174	13.5	4.06	90	661.09	61.9344	34.5758
2015-01-13 15:30:00	8.6344	34.033	293.371	100.619	0.8174	1.23453	0.6678	13	3.51	64	259.831	35.5836	19.4703
2015-01-13 15:45:00	8.5425	33.862	302.051	103.238	0.8418	1.26332	0.6363	12.5	4.47	50	210.502	43.4735	23.667
2015-01-13 16:00:00	8.5119	33.862	303.201	103.457	0.8296	1.24893	0.6048	12.6	5.11	51	378.267	40.6214	20.1428
2015-01-13 16:15:00	8.5272	33.789	298.339	101.844	0.8906	1.32091	0.6174	12.8	3.83	51	305.929	32.0628	15.276
2015-01-13 16:30:00	8.5272	33.78	296.239	101.182	0.915	1.3497	0.63	12.8	3.99	50	154.617	24.8447	11.0794
2015-01-13 16:45:00	8.5476	33.77	296.333	101.362	0.915	1.3497	0.63	12.6	2.58	66	148.038	17.4583	7.38619
2015-01-13 17:00:00	8.7216	33.901	292.934	100.685	0.9516	1.39289	0.6678	12.3	3.23	64	82.2425	11.2473	4.53248
2015-01-13 17:15:00	8.918	34.067	289.773	99.9714	0.9272	1.3641	0.6426	11.9	2.71	54	32.8978	5.37173	2.35013
2015-01-13 17:30:00	8.9492	33.999	290.035	100.009	1.037	1.49366	0.6804	11.1	2.11	38	13.1596	1.67869	1.00721
2015-01-13 17:45:00	8.9284	34.01	292.085	100.674	1.037	1.49366	0.693	10.5	1.23	90	0	0.335739	0.335739
2015-01-13 18:00:00	8.9128	34.015	292.854	100.902	1.586	2.14148	0.6867	9.9	1.43	60	0	0	0.167879
2015-01-13 18:15:00	8.8661	34.002	291.729	100.399	1.0614	1.52245	0.6489	10.2	1.9	69	0	0	0.335792
2015-01-13 18:30:00	8.8454	33.965	293.788	101.029	1.2932	1.79598	0.6363	10.3	1.18	104	0	0	0.167898
2015-01-13 18:45:00	8.8299	33.98	293.927	101.048	1.22	1.7096	0.6489	10.6	1.07	100	0	0	0.167899
2015-01-13 19:00:00	8.804	33.966	293.189	100.708	1.1834	1.66641	0.6489	10.4	1.24	96	0	0	0.167898
2015-01-13 19:15:00	8.7782	33.962	294.756	101.211	1.1346	1.60883	0.6615	10.4	1.51	95	0	0	0.167916
2015-01-13 19:30:00	8.7421	33.939	296.3	101.643	1.2078	1.6952	0.6615	10.3	1.88	85	0	0	0.167924
2015-01-13 19:45:00	8.7319	33.94	296.813	101.821	1.1102	1.58004	0.6363	10.3	1.18	74	0	0	0.335852
2015-01-13 20:00:00	8.7319	33.949	296.426	101.695	1.037	1.49366	0.63	10.7	1.28	98	0	0	0.335852
2015-01-13 20:15:00	8.7421	33.949	296.081	101.577	1.0248	1.47926	0.6678	10.7	1.83	264	0	0	0.167932
2015-01-13 20:30:00	8.7421	33.949	296.113	101.588	1.0248	1.47926	0.6174	10.9	0.69	282	0	0	0.167943
2015-01-13 20:45:00	8.7524	33.949	295.638	101.458	1.098	1.56564	0.6237	10.5	1.82	39	0	0	0.167952
2015-01-13 21:00:00	8.7627	33.929	295.325	101.348	1.0858	1.55124	0.63	11.3	2.84	57	0	0	0.167954
2015-01-13 21:15:00	8.7421	33.91	294.252	100.967	1.037	1.49366	0.6237	11.8	3.62	56	0	0.335909	0.167954
2015-01-13 21:30:00	8.6651	33.85	292.354	100.095	1.037	1.49366	0.5922	11.7	4.09	61	0	0	0.167951
2015-01-13 21:45:00	8.5119	33.746	293.312	100.13	1.0736	1.53685	0.5985	11.6	4.3	67	0	0.335906	0.167953
2015-01-13 22:00:00	8.5272	33.761	292.449	99.9946	1.0126	1.46487	0.6426	11.5	3.98	77	0	0.335907	0.167953
2015-01-13 22:15:00	8.66	33.874	292.56	100.192	1.0248	1.47926	0.6237	11.3	4.51	75	0	0	0.167942
2015-01-13 22:30:00	8.6088	33.856	294.607	100.751	1.0248	1.47926	0.5985	11.1	4.43	62	0	0.335893	0.167947
2015-01-13 22:45:00	8.6907	33.921	294.55	100.926	1.159	1.63762	0.6237	10.1	0.58	240	0	0.167942	0.167942
2015-01-13 23:00:00	8.7216	33.93	295.028	101.117	1.2566	1.75279	0.63	9.9	1.16	74	0	0	0.167937
2015-01-13 23:15:00	8.5374	33.876	294.971	100.672	1.2566	1.75279	0.6237	9.9	0.37	118	0	0	0.167939
2015-01-13 23:30:00	8.5527	33.89	294.476	100.469	1.281	1.78158	0.6048	10.6	1.34	73	0	0	0.335903
2015-01-13 23:45:00	8.4865	33.877	294.073	100.28	1.3054	1.81037	0.5859	10.3	0.84	72	0	0	0.167954
2015-01-14	8.5119	33.881	294.726	100.549	1.3054	1.81037	0.6174	10.3	0.43	100	0	0	0.167954
2015-01-14 00:15:00	8.5221	33.9	294.161	100.412	1.5006	2.04071	0.6048	10.5	0.25	41	0	0	0.167954
2015-01-14 00:30:00	8.5476	33.905	294.415	100.458	1.3054	1.81037	0.6174	10.2	0.27	172	0	0	0.167954
2015-01-14 00:45:00	8.5629	33.967	294.242	100.547	1.2566	1.75279	0.6237	9.9	0.6	229	0	0	0.167954
2015-01-14 01:00:00	8.5731	33.977	294.559	100.727	1.281	1.78158	0.6426	10.1	0.98	236	0	0	0.167954
2015-01-14 01:15:00	8.5833	33.967	294.403	100.71	1.3176	1.82477	0.6237	10.2	1.11	217	0	0.335912	0.167956
2015-01-14 01:30:00	8.5629	33.967	293.891	100.406	1.2444	1.73839	0.6111	10.3	1.36	249	0	0.335909	0.335909
2015-01-14 01:45:00	8.5272	33.953	294.165	100.447	1.1956	1.68081	0.6489	10.5	1.34	253	0	0.167954	0.167954
2015-01-14 02:00:00	8.5476	33.953	294.781	100.787	1.098	1.56564	0.6489	10.3	0.7	75	0	0	0.167955
2015-01-14 02:15:00	8.5884	33.923	294.372	100.628	1.1468	1.62322	0.6048	10.2	0.11	230	0	0	0.167954
2015-01-14 02:30:00	8.6139	33.947	294.179	100.599	1.1468	1.62322	0.6111	9.9	0.87	250	0	0	0.16796
2015-01-14 02:45:00	8.6241	33.947	293.502	100.465	1.159	1.63762	0.63	10.1	0.43	62	0	0	0.167958
2015-01-14 03:00:00	8.6139	33.947	294.18	100.675	1.0736	1.53685	0.6048	10	0.35	247	0	0	0.16796
2015-01-14 03:15:00	8.6395	33.98	293.522	100.504	1.2444	1.73839	0.6363	9.8	0.61	224	0	0	0.167955
2015-01-14 03:30:00	8.6446	33.956	293.352	100.473	1.1834	1.66641	0.63	10	0.51	154	0	0	0.167958
2015-01-14 03:45:00	8.6497	33.98	292.744	100.28	1.2688	1.76718	0.6048	9.8	0.63	249	0	0	0.167957
2015-01-14 04:00:00	8.6702	33.989	292.347	100.171	1.1346	1.60883	0.6111	9.9	1.25	270	0	0	0.16796
2015-01-14 04:15:00	8.6241	33.937	294.019	100.635	1.2932	1.79598	0.6237	9.9	2.3	256	0	0	0.167962
2015-01-14 04:30:00	8.6241	33.947	292.086	99.905	1.2688	1.76718	0.5985	10	1.65	242	0	0.16796	0.16796
2015-01-14 04:45:00	8.6395	33.961	293.204	100.383	1.1102	1.58004	0.5985	10.1	2.43	255	0	0	0.167965
2015-01-14 05:00:00	8.5782	33.933	291.711	99.7676	1.22	1.7096	0.5859	10.2	1.65	271	0	0	0.167971
2015-01-14 05:15:00	8.5782	33.924	291.686	99.7105	1.2078	1.6952	0.5985	10	2.37	273	0	0	0.167959
2015-01-14 05:30:00	8.568	33.914	290.172	99.1224	1.0614	1.52245	0.5796	9.9	1.16	259	0	0	0.167962
2015-01-14 05:45:00	8.5425	33.91	290.77	99.2709	1.0858	1.55124	0.5859	9.8	0.38	248	0	0	0.335919
2015-01-14 06:00:00	8.5272	33.915	291.35	99.4509	1.0614	1.52245	0.5859	9.7	0.86	263	0	0	0.167961
2015-01-14 06:15:00	8.4409	33.853	291.226	99.2301	0.9516	1.39289	0.5922	8.8	1.32	280	0	0	0.167963
2015-01-14 06:30:00	8.4561	33.877	287.975	98.1374	1.0614	1.52245	0.6048	9.3	0.52	212	0	0	0.167961
2015-01-14 06:45:00	8.4764	33.867	286.519	97.6561	1.0492	1.50806	0.5859	9.3	0.85	170	0	0	0.167971
2015-01-14 07:00:00	8.4713	33.872	287.873	98.0364	1.0248	1.47926	0.5733	9	0.04	16	0	0	0.167971
2015-01-14 07:15:00	8.3853	33.819	288.683	98.1516	0.9516	1.39289	0.567	9	0.1	238	0	0	0.167977
2015-01-14 07:30:00	8.3651	33.829	287.912	97.8748	0.9516	1.39289	0.5796	8.2	0.19	231	0	0	0.16798
2015-01-14 07:45:00	8.3499	33.815	288.038	97.8563	0.9272	1.3641	0.5859	8.5	1.57	286	0	0.335964	0.167982
2015-01-14 08:00:00	8.355	33.79	288.76	97.9802	0.915	1.3497	0.5733	8.2	1.56	315	0	0.335965	0.503947
2015-01-14 08:15:00	8.2644	33.781	291.119	98.6792	0.9516	1.39289	0.5985	7.6	2.44	308	13.1646	2.01579	1.00789
2015-01-14 08:30:00	8.2644	33.781	290.387	98.4312	0.9394	1.37849	0.5922	8	2.22	261	36.2028	5.54342	2.35175
2015-01-14 08:45:00	8.2644	33.781	291.309	98.7647	0.9272	1.3641	0.5859	8	2.38	266	62.5321	11.0868	4.19956
2015-01-14 09:00:00	8.2694	33.785	291.558	98.8837	0.915	1.3497	0.5922	8	2.07	273	88.8614	17.4702	7.05526
2015-01-14 09:15:00	8.2895	33.776	291.271	98.7915	0.854	1.27772	0.567	9.2	2.5	249	260.002	25.1974	10.9189
2015-01-14 09:30:00	8.2946	33.771	293.58	99.6032	0.9638	1.40728	0.567	9.3	2.36	291	332.408	33.4285	15.1184
2015-01-14 09:45:00	8.2895	33.776	293.297	99.5105	1.0614	1.52245	0.5859	9.7	0.88	40	404.813	41.9956	19.6539
2015-01-14 10:00:00	8.3399	33.805	293.027	99.5555	1.037	1.49366	0.5796	8.9	1.28	5	483.801	50.8987	25.0294
2015-01-14 10:15:00	8.355	33.81	293.786	99.8381	1.0736	1.53685	0.5859	10.3	0.32	24	556.207	60.1343	30.571
2015-01-14 10:30:00	8.4206	33.814	294.101	100.023	1.0736	1.53685	0.5418	9	1.57	339	674.688	72.3879	38.1254
2015-01-14 10:45:00	8.4004	33.815	293.311	99.787	0.9638	1.40728	0.5481	9	1.21	35	812.917	82.4538	44.3336
2015-01-14 11:00:00	8.4004	33.834	292.829	99.656	0.9638	1.40728	0.5796	10	0.43	34	483.762	74.5519	43.8244
2015-01-14 11:15:00	8.4561	33.819	293.389	99.9462	0.9638	1.40728	0.5796	10.9	3.17	254	779.868	88.8201	51.378
2015-01-14 11:30:00	8.4257	33.829	293.265	99.9097	1.098	1.56564	0.5544	11.2	0.86	313	523.13	65.3124	39.2882
2015-01-14 11:45:00	8.4916	33.852	293.746	100.167	1.0736	1.53685	0.5607	11.4	1.06	317	424.421	65.647	41.3022
2015-01-14 12:00:00	8.5782	33.856	294.729	100.655	1.2078	1.6952	0.5481	11.5	1.57	317	944.254	100.725	61.4424
2015-01-14 12:15:00	8.517	33.857	294.769	100.571	1.0248	1.47926	0.5733	11.9	2.14	261	796.2	103.744	65.6373
2015-01-14 12:30:00	8.568	33.827	295.931	101.067	0.915	1.3497	0.567	12.6	1.71	204	799.49	101.561	64.1263
2015-01-14 12:45:00	8.5578	33.837	295.516	100.887	0.8662	1.29212	0.5607	12.8	2.37	238	845.533	90.9854	70.0017
2015-01-14 13:00:00	8.5782	33.837	295.617	100.943	0.8174	1.23453	0.5922	13.7	0.43	198	950.815	112.305	70.0017
2015-01-14 13:15:00	8.6088	33.827	295.472	100.981	0.793	1.20574	0.567	13.7	1.57	192	944.154	111.129	68.8264
2015-01-14 13:30:00	8.5731	33.842	295.858	101.107	0.671	1.06178	0.5481	14	2.02	209	950.681	110.12	67.3142
2015-01-14 13:45:00	8.6139	33.822	296.124	101.195	0.7808	1.19134	0.5481	14	1.26	174	927.511	108.432	65.2944
2015-01-14 14:00:00	8.6241	33.841	298.664	102.233	0.732	1.13376	0.5859	14	1	200	700.558	108.762	64.2837
2015-01-14 14:15:00	8.6497	33.941	298.643	102.411	0.9638	1.40728	0.6111	13.8	2.4	152	305.877	77.0363	48.3365
2015-01-14 14:30:00	8.6702	33.883	296.624	101.538	0.7442	1.14816	0.5607	14.4	0.83	278	825.539	94.65	54.0378
2015-01-14 14:45:00	8.8143	34.071	294.041	101.523	0.8418	1.26332	0.6048	13.4	2.19	269	726.869	85.2495	47.6591
2015-01-14 15:00:00	8.8661	33.964	295.362	101.702	1.0614	1.52245	0.5985	14.1	2.16	256	740.025	80.2135	43.2951
2015-01-14 15:15:00	8.97	33.846	296.503	102.083	1.1834	1.66641	0.5796	13.9	3.06	341	628.199	70.4723	37.2496
2015-01-14 15:30:00	8.9752	33.85	295.222	101.851	1.3786	1.89675	0.567	13	2.1	336	555.841	61.9142	31.5444
2015-01-14 15:45:00	8.9544	33.851	297.664	102.541	1.3786	1.89675	0.5544	13.2	3.33	341	457.171	51.8475	25.5043
2015-01-14 16:00:00	9.0013	33.835	297.169	102.491	1.5738	2.12708	0.5733	13.2	2.19	302	358.501	42.7898	20.1364
2015-01-14 16:15:00	8.97	33.827	296.288	102.094	1.5372	2.0839	0.5859	13.7	3.01	294	365.079	34.9047	15.7742
2015-01-14 16:30:00	8.9856	33.821	296.524	102.205	1.8666	2.47259	0.5733	13.3	2.05	302	167.739	26.3467	11.2435
2015-01-14 16:45:00	8.9856	33.821	295.535	101.831	1.4274	1.95433	0.5733	13.3	3.08	337	174.317	18.796	7.38415
2015-01-14 17:00:00	8.9596	33.827	296.407	102.059	1.5006	2.04071	0.5733	12.6	2.91	352	82.225	11.413	4.36379
2015-01-14 17:15:00	8.918	33.829	296.807	102.133	1.4762	2.01192	0.5733	11.8	2.2	345	36.179	5.87444	2.34978
2015-01-14 17:30:00	8.8972	33.829	296.522	101.985	1.6226	2.18467	0.5796	11.7	2.25	337	13.1579	2.35006	1.00717
2015-01-14 17:45:00	8.9388	33.837	296.966	102.252	1.5006	2.04071	0.5292	11.3	2.61	333	0	0.167869	0.335738
2015-01-14 18:00:00	8.9076	33.867	298.475	102.673	1.464	1.99752	0.5859	11.3	1.94	317	0	0.16787	0.16787
2015-01-14 18:15:00	8.8713	33.835	296.834	102.03	1.403	1.92554	0.5733	11.1	0.8	202	0	0	0.335743
2015-01-14 18:30:00	8.8609	33.835	296.519	101.882	1.3298	1.83916	0.5733	10.8	0.77	232	0	0	0.33579
2015-01-14 18:45:00	8.8609	33.845	299.95	103.102	1.3176	1.82477	0.567	10.7	0.7	210	0	0	0.167898
2015-01-14 19:00:00	8.892	33.853	301.032	103.495	1.3298	1.83916	0.5733	10.6	0.23	169	0	0.335796	0.167898
2015-01-14 19:15:00	8.8402	33.855	300.314	103.185	1.3054	1.81037	0.5922	11	1.22	303	0	0.167906	0.167906
2015-01-14 19:30:00	8.8713	33.873	301.831	103.749	1.3176	1.82477	0.5796	10.1	0.85	214	0	0.167923	0.167923
2015-01-14 19:45:00	8.8454	33.879	300.244	103.179	1.2688	1.76718	0.5481	9.7	1.26	220	0	0	0.335852
2015-01-14 20:00:00	8.8247	33.87	302.032	103.755	1.3542	1.86796	0.5796	9.8	0.9	228	0	0	0.167928
2015-01-14 20:15:00	8.7524	33.833	299.956	102.841	1.1102	1.58004	0.5544	9.7	0.82	236	0	0	0.167946
2015-01-14 20:30:00	8.7216	33.844	298.697	102.416	1.0736	1.53685	0.567	9.4	0.73	263	0	0.335907	0.167954
2015-01-14 20:45:00	8.7421	33.843	299.886	102.812	1.1346	1.60883	0.5481	9.1	0.37	272	0	0	0.335923
2015-01-14 21:00:00	8.7524	33.853	304.677	104.394	1.1102	1.58004	0.5544	8.7	0.28	6	0	0.167964	0.335929
2015-01-14 21:15:00	8.7627	33.862	305.371	104.728	1.159	1.63762	0.5418	8.6	0.58	328	0	0	0.167977
2015-01-14 21:30:00	8.7627	33.862	304.749	104.537	1.1468	1.62322	0.5607	8.3	0.76	240	0	0	0
2015-01-14 21:45:00	8.7319	33.853	304.687	104.443	1.1712	1.65202	0.5481	9.2	0.64	244	0	0.167983	0.167983
2015-01-14 22:00:00	8.7216	33.863	302.473	103.624	1.1956	1.68081	0.5859	9.3	0.49	181	0	0	0.167983
2015-01-14 22:15:00	8.6959	33.849	302.79	103.723	1.2078	1.6952	0.5733	9	0.44	208	0	0	0.335965
2015-01-14 22:30:00	8.7421	33.872	305.274	104.679	1.281	1.78158	0.567	8.2	1.53	306	0	0.167983	0.167983
2015-01-14 22:45:00	8.7421	33.872	304.854	104.491	1.3298	1.83916	0.5607	7.7	0.11	339	0	0.167983	0.167983
2015-01-14 23:00:00	8.7216	33.863	308.59	105.745	1.1712	1.65202	0.5922	8	0.27	190	0	0	0.167983
2015-01-14 23:15:00	8.7627	33.872	314.418	107.819	1.1224	1.59443	0.5481	7.9	1.02	1	0	0	0.167983
2015-01-14 23:30:00	8.7782	33.866	316.515	108.583	1.2566	1.75279	0.5859	7.8	0.81	22	0	0.335965	0.167983
2015-01-14 23:45:00	8.7731	33.871	313.233	107.465	1.22	1.7096	0.5355	7.7	0.01	301	0	0.335965	0.167983
2015-01-15	8.7834	33.871	312.074	107.059	1.2444	1.73839	0.5544	7.4	0.31	149	0	0	0.167983
2015-01-15 00:15:00	8.6497	33.826	307.655	105.243	1.1834	1.66641	0.5544	7.8	0.46	4	0	0	0.167983
2015-01-15 00:30:00	8.5425	33.784	300.978	102.633	1.22	1.7096	0.5292	7.6	0.28	30	0	0.167983	0.167983
2015-01-15 00:45:00	8.5374	33.818	298.62	101.917	1.4152	1.93994	0.5544	7.7	0.36	339	0	0	0
2015-01-15 01:00:00	8.517	33.799	296.172	101.036	1.159	1.63762	0.5418	7.6	0.55	312	0	0	0.167986
2015-01-15 01:15:00	8.5986	33.866	294.484	100.645	1.1956	1.68081	0.5355	7.1	0.21	223	0	0	0.167986
2015-01-15 01:30:00	8.568	33.837	293.547	100.22	1.464	1.99752	0.5733	7.6	0.62	169	0	0	0
2015-01-15 01:45:00	8.5272	33.838	295.436	100.769	1.281	1.78158	0.5481	7.7	0.21	223	0	0	0.167983
2015-01-15 02:00:00	8.5221	33.823	296.258	101.062	1.2078	1.6952	0.5481	7.7	0.48	344	0	0	0.167985
2015-01-15 02:15:00	8.5272	33.838	295.311	100.739	1.1834	1.66641	0.5544	7.6	0.21	103	0	0	0.167988
2015-01-15 02:30:00	8.5374	33.847	295.457	100.805	1.281	1.78158	0.5481	8.5	0.81	141	0	0.167993	0.167993
2015-01-15 02:45:00	8.5578	33.847	294.874	100.66	1.1224	1.59443	0.5481	8	0.56	252	0	0	0.167993
2015-01-15 03:00:00	8.5476	33.837	295.917	101.38	1.1468	1.62322	0.5544	8.4	0.61	166	0	0.167994	0.167994
2015-01-15 03:15:00	8.619	33.846	297.254	101.712	1.1956	1.68081	0.5481	8.8	1.37	25	0	0	0.167985
2015-01-15 03:30:00	8.6497	33.845	301.122	103.276	1.1224	1.59443	0.5796	9.6	0.53	15	0	0	0
2015-01-15 03:45:00	8.8247	33.918	298.556	102.674	1.1224	1.59443	0.5733	8.9	2.84	94	0	0	0.167983
2015-01-15 04:00:00	8.892	34.035	291.072	100.337	1.0858	1.55124	0.5733	8.6	3.91	68	0	0	0.167983
2015-01-15 04:15:00	8.9128	34.053	288.116	99.445	0.9516	1.39289	0.567	8.6	1.16	136	0	0	0.167983
2015-01-15 04:30:00	8.8713	34.064	290.841	100.273	0.9882	1.43608	0.5922	8.4	1.05	58	0	0	0
2015-01-15 04:45:00	9.0274	34.287	280.18	97.0217	0.8174	1.23453	0.6048	8.5	5.02	77	0	0	0.167983
2015-01-15 05:00:00	9.0117	34.206	285.931	98.7908	1.098	1.56564	0.6048	8.5	5.75	79	0	0	0.167983
2015-01-15 05:15:00	8.97	34.199	285.745	98.7291	1.037	1.49366	0.6237	8.5	8.1	71	0	0	0.167983
2015-01-15 05:30:00	8.9336	34.205	280.07	96.8218	0.9516	1.39289	0.5922	8.5	7.38	61	0	0.167983	0.167983
2015-01-15 05:45:00	8.8713	34.103	285.83	98.5052	0.9882	1.43608	0.5859	8.6	6.33	64	0	0	0.167983
2015-01-15 06:00:00	8.9336	34.138	287.215	98.9518	1.037	1.49366	0.6111	8.7	6.1	61	0	0	0.167983
2015-01-15 06:15:00	8.8661	34.098	287.207	98.8812	1.1102	1.58004	0.5859	8.9	7.17	59	0	0	0.167983
2015-01-15 06:30:00	8.8557	34.089	286.964	98.7813	1.2444	1.73839	0.5922	9	7.22	58	0	0	0.167983
2015-01-15 06:45:00	8.8505	34.094	285.494	98.247	1.1224	1.59443	0.6111	9	7.16	63	0	0	0.167983
2015-01-15 07:00:00	8.8557	34.127	287.071	98.8107	1.2078	1.6952	0.693	9.2	8.6	62	0	0	0.335965
2015-01-15 07:15:00	8.8557	34.175	287.769	99.0816	1.2566	1.75279	0.7119	9.4	8.53	53	0	0.167983	0.167983
2015-01-15 07:30:00	8.835	34.176	287.075	98.8011	1.2688	1.76718	0.8253	9.4	7.53	58	0	0	0.335965
2015-01-15 07:45:00	8.8247	34.157	287.122	98.7837	1.1712	1.65202	0.6804	9.4	6.53	71	0	0	0.167983
2015-01-15 08:00:00	8.8195	34.172	285.078	98.1218	1.0492	1.50806	0.6678	9.3	5.9	68	0	0.167983	0.335965
2015-01-15 08:15:00	8.8143	34.177	284.075	97.7481	1.098	1.56564	0.6678	9.5	7.42	65	13.1647	2.01579	1.00789
2015-01-15 08:30:00	8.804	34.139	283.494	97.4512	1.1346	1.60883	0.6363	9.5	9.77	56	42.7852	5.71141	2.18377
2015-01-15 08:45:00	8.6702	33.97	285.074	97.6467	1.0126	1.46487	0.6867	9.5	6.4	58	82.2791	11.4228	4.36755
2015-01-15 09:00:00	8.6497	33.951	286.929	98.2174	0.9028	1.3353	0.6489	9.6	8.78	52	121.773	18.6459	7.39118
2015-01-15 09:15:00	8.6497	33.932	289.352	99.0028	1.1102	1.58004	0.6552	9.9	5.86	61	266.584	27.7171	11.5908
2015-01-15 09:30:00	8.6497	33.942	288.973	98.922	1.0858	1.55124	0.6552	10.2	6.64	67	371.902	37.2921	16.1263
2015-01-15 09:45:00	8.6548	33.917	288.281	98.6689	1.0614	1.52245	0.7308	10.5	6.34	60	470.637	44.5136	20.3251
2015-01-15 10:00:00	8.66	33.932	287.915	98.5534	0.9516	1.39289	0.8001	10.8	5.75	61	483.801	49.8856	24.3549
2015-01-15 10:15:00	8.6651	33.908	288.779	98.8655	0.976	1.42168	0.8442	10.9	4.6	72	450.89	55.7612	28.7204
2015-01-15 10:30:00	8.6754	33.927	289.367	99.1003	0.854	1.27772	0.7938	11.1	7.86	60	585.827	72.5527	38.1238
2015-01-15 10:45:00	8.701	33.921	291.163	99.7865	0.7076	1.10497	0.8253	11.5	5.88	57	832.665	85.3086	45.0053
2015-01-15 11:00:00	8.7164	33.945	290.785	99.7256	0.8662	1.29212	0.819	11.5	6.55	62	533.169	72.2084	40.8062
2015-01-15 11:15:00	8.7782	33.953	290.716	99.8238	0.732	1.13376	0.8064	12	5.29	62	914.938	93.0257	51.8862
2015-01-15 11:30:00	8.8143	34.014	293.883	101.286	0.8906	1.32091	0.7875	12	5.79	69	977.43	100.744	57.2563
2015-01-15 11:45:00	8.8661	34.002	292.316	100.603	0.7442	1.14816	0.8127	12.6	4.42	69	983.916	105.106	61.452
2015-01-15 12:00:00	8.8868	34.011	296.099	102.085	0.8174	1.23453	0.9576	12.7	3.99	66	727.136	94.3602	57.9258
2015-01-15 12:15:00	8.9596	34.18	297.408	102.76	1.0614	1.52245	0.756	12.7	3.23	68	727.111	99.2279	61.6187
2015-01-15 12:30:00	9.0065	34.183	292.768	101.221	1.037	1.49366	0.7938	12.9	3.58	107	911.353	112.49	69.3411
2015-01-15 12:45:00	9.0378	34.153	292.259	101.154	1.0614	1.52245	0.8001	12.8	3.83	66	700.788	99.7222	61.1093
2015-01-15 13:00:00	9.0797	34.217	293.589	101.819	1.1224	1.59443	0.756	12.9	4.07	84	602.085	91.9937	58.7551
2015-01-15 13:15:00	9.1637	34.27	294.638	102.294	1.0004	1.45047	0.9387	13.4	2.82	111	858.712	106.094	65.805
2015-01-15 13:30:00	9.2112	34.367	291.629	101.377	0.671	1.06178	0.7938	13.2	4.29	94	931.093	110.29	67.6515
2015-01-15 13:45:00	9.2112	34.215	303.694	105.433	0.7564	1.16255	0.7497	13.1	4.65	63	1023.21	114.655	68.9945
2015-01-15 14:00:00	9.2165	34.333	288.797	100.408	0.6466	1.03299	0.7623	13.2	3.35	79	838.918	103.911	62.6154
2015-01-15 14:15:00	9.2693	34.377	287.417	100.07	0.8906	1.32091	0.7371	13.1	3.6	87	805.95	97.3645	49.5216
2015-01-15 14:30:00	9.2693	34.387	286.506	99.8183	0.7808	1.19134	0.7749	13.2	4.49	102	835.545	94.5097	54.8928
2015-01-15 14:45:00	9.3382	34.453	288.04	100.482	0.9272	1.3641	0.8064	13.1	3.4	74	773.091	87.1243	49.3537
2015-01-15 15:00:00	9.3276	34.387	291.131	101.485	0.9516	1.39289	0.7812	13.5	4.41	94	694.099	77.722	42.9737
2015-01-15 15:15:00	9.3489	34.433	295.002	102.912	0.9272	1.3641	0.7623	13.5	2.74	79	634.795	69.9951	37.4314
2015-01-15 15:30:00	9.3701	34.365	298.254	104.083	1.037	1.49366	0.7623	13.8	4.12	97	555.845	61.0959	31.7229
2015-01-15 15:45:00	9.4181	34.433	299.443	104.629	0.9882	1.43608	0.7623	13.7	2.71	113	476.905	52.1989	26.1834
2015-01-15 16:00:00	9.4448	34.407	301.311	105.285	0.8418	1.26332	0.9135	13.5	2.3	143	391.391	42.9674	20.8124
2015-01-15 16:15:00	9.4608	34.382	301.111	105.199	0.9516	1.39289	0.7119	13.1	4.83	75	312.458	34.2397	15.7771
2015-01-15 16:30:00	9.4608	34.373	303.005	105.889	0.9394	1.37849	0.6993	13.1	3.01	74	233.519	26.1834	11.4133
2015-01-15 16:45:00	9.4288	34.413	303.826	106.168	1.0248	1.47926	0.7371	12.6	3.5	66	148.005	18.6307	7.72082
2015-01-15 17:00:00	9.4555	34.416	306.623	107.194	0.915	1.3497	0.7245	12.5	3.46	68	88.8065	11.9171	4.69969
2015-01-15 17:15:00	9.4501	34.411	304.62	106.531	0.976	1.42168	0.6867	12.2	3.26	72	36.1839	6.21098	2.51797
2015-01-15 17:30:00	9.4501	34.402	305.407	106.763	0.9882	1.43608	0.693	11.9	2.5	60	13.1588	2.35017	1.17508
2015-01-15 17:45:00	9.4234	34.352	305.239	106.664	0.8906	1.32091	0.6993	11.7	2.64	66	0	0.335739	0.335739
2015-01-15 18:00:00	9.4021	34.344	303.865	106.101	0.976	1.42168	0.6993	12.2	4.05	54	0	0	0.16787
2015-01-15 18:15:00	9.4234	34.361	307.621	107.428	1.037	1.49366	0.7308	11.6	2.89	83	0	0	0.16787
2015-01-15 18:30:00	9.4074	34.301	303.362	105.86	1.22	1.7096	0.7875	12.2	2.44	87	0	0.335772	0.167886
2015-01-15 18:45:00	9.3755	34.228	298.165	103.932	1.2444	1.73839	0.7938	12.8	1.02	165	0	0.167897	0.167897
2015-01-15 19:00:00	9.3914	34.26	297.094	103.591	1.281	1.78158	0.8064	13.8	3.83	124	0	0	0.335796
2015-01-15 19:15:00	9.3914	34.298	299.407	104.426	1.2688	1.76718	0.7623	13.7	2.98	102	0	0	0.167899
2015-01-15 19:30:00	9.3382	34.235	301.59	105.139	1.1834	1.66641	0.7938	13.7	3.08	132	0	0	0
2015-01-15 19:45:00	9.4288	34.337	307.421	107.35	1.098	1.56564	0.7623	13.5	1.92	116	0	0	0.167905
2015-01-15 20:00:00	9.4501	34.326	308.949	107.972	1.0736	1.53685	0.7812	13.3	1.47	117	0	0	0.167899
2015-01-15 20:15:00	9.4662	34.368	311.648	108.934	1.0736	1.53685	0.7434	13.2	1.15	157	0	0	0.167904
2015-01-15 20:30:00	9.4715				1.159	1.63762	0.7686	13	0.35	155	0	0	0
2015-01-15 20:45:00	9.4021				1.1956	1.68081	0.7749	13.1	0.48	86	0	0.335797	0.167898
2015-01-15 21:00:00	9.4181				1.1102	1.58004	0.7623	12.8	0.79	109	0	0.335796	0.167898
2015-01-15 21:15:00	9.4501				1.0614	1.52245	0.7434	12.7	0.85	52	0	0	0.167899
2015-01-15 21:30:00	9.4341				1.159	1.63762	0.7686	12.4	1.05	172	0	0	0
2015-01-15 21:45:00	9.4128				1.1346	1.60883	0.7623	12.5	0.87	153	0	0	0
2015-01-15 22:00:00	9.4394				1.1346	1.60883	0.7686	11.9	0.48	272	0	0	0.335838
2015-01-15 22:15:00	9.4128				1.1468	1.62322	0.7686	12.7	1.48	161	0	0	0.167924
2015-01-15 22:30:00	9.3276				1.1834	1.66641	0.7434	12.9	1.58	150	0	0.335852	0.167926
2015-01-15 22:45:00	9.2852				1.1468	1.62322	0.7308	13.2	2.5	140	0	0.167926	0.167926
2015-01-15 23:00:00	9.2746				1.2322	1.724	0.7434	13.2	4.17	153	0	0	0.167926
2015-01-15 23:15:00	9.2534				1.2566	1.75279	0.693	13.3	3.59	139	0	0	0.167926
2015-01-15 23:30:00	9.2746				1.22	1.7096	0.7245	13.2	2.22	134	0	0	0.335852
2015-01-15 23:45:00	9.3648				1.2078	1.6952	0.7371	13.2	1.38	136	0	0	0.167925
2015-01-16	9.3968				1.2932	1.79598	0.7497	13	2.03	132	0	0.167924	0.167924
2015-01-16 00:15:00	9.3968				1.3054	1.81037	0.7497	13	2.06	153	0	0.167926	0.167926
2015-01-16 00:30:00	9.4234				1.3542	1.86796	0.7497	13	1.55	142	0	0	0.335851
2015-01-16 00:45:00	9.4074				1.4762	2.01192	0.7497	12.3	0.49	210	0	0.335842	0
2015-01-16 01:00:00	9.3914				1.1834	1.66641	0.7182	12.5	0.54	175	0	0	0.167924
2015-01-16 01:15:00	9.317				1.2322	1.724	0.7308	12	1.82	227	0	0	0.335852
2015-01-16 01:30:00	9.3436				1.0126	1.46487	0.7056	12.9	1.7	171	0	0	0.167923
2015-01-16 01:45:00	9.3968				1.342	1.85356	0.7371	12.8	1.08	171	0	0.167926	0.167926
2015-01-16 02:00:00	9.4021				1.1834	1.66641	0.7749	13.5	2.52	194	0	0	0.167924
2015-01-16 02:15:00	9.4822				1.1346	1.60883	0.7371	13.4	2	182	0	0	0.167926
2015-01-16 02:30:00	9.4555				1.098	1.56564	0.7497	13.7	2.88	190	0	0	0.167926
2015-01-16 02:45:00	9.6543				1.0614	1.52245	0.819	13.7	2.71	173	0	0.167924	0.167924
2015-01-16 03:00:00	9.6327				1.0248	1.47926	0.8631	13.5	3.01	201	0	0	0.167921
2015-01-16 03:15:00	9.6435				1.0858	1.55124	0.8946	13.6	1.09	143	0	0.167909	0.167909
2015-01-16 03:30:00	9.6867				1.1224	1.59443	0.8127	13.6	1.44	159	0	0	0.167905
2015-01-16 03:45:00	9.6381				1.098	1.56564	0.8379	13.4	1.69	156	0	0	0.335798
2015-01-16 04:00:00	9.7464				1.1224	1.59443	0.8694	13.4	0.55	173	0	0	0.167898
2015-01-16 04:15:00	9.6976				1.0614	1.52245	0.819	13.6	1.27	143	0	0.167898	0.167898
2015-01-16 04:30:00	9.9209				1.0492	1.50806	1.0206	13.8	2.81	189	0	0	0.167898
2015-01-16 04:45:00	9.6813				1.2322	1.724	0.8631	13.8	0.84	135	0	0	0.167898
2015-01-16 05:00:00	10.186				0.854	1.27772	1.134	13.9	3.1	185	0	0	0.335796
2015-01-16 05:15:00	10.141				0.9638	1.40728	1.0206	14.1	2.59	133	0	0	0.167898
2015-01-16 05:30:00	10.275				0.793	1.20574	1.071	14.5	4.08	212	0	0	0.167898
2015-01-16 05:45:00	10.18				0.8418	1.26332	1.0206	14.5	2.52	159	0	0	0.1679
2015-01-16 06:00:00	10.275				0.854	1.27772	1.0584	14.3	1.39	164	0	0.167899	0.167899
2015-01-16 06:15:00	10.297				0.732	1.13376	1.197	14	0.88	178	0	0	0.167904
2015-01-16 06:30:00	10.158				0.7564	1.16255	1.0836	11.8	1.21	81	0	0	0.1679
2015-01-16 06:45:00	9.8116				0.8784	1.30651	0.8883	13.2	0.47	195	0	0.1679	0.1679
2015-01-16 07:00:00	9.8334				0.9882	1.43608	0.882	12.3	1.95	307	0	0	0.167902
2015-01-16 07:15:00	9.6597				0.8662	1.29212	0.7623	13.2	0.72	315	0	0	0.335797
2015-01-16 07:30:00	9.6381				0.8906	1.32091	0.7623	13.9	2.55	350	0	0.335796	0.167898
2015-01-16 07:45:00	9.5627				0.8174	1.23453	0.7875	14.1	1.3	150	0	0	0.167898
2015-01-16 08:00:00	9.5519				0.7442	1.14816	0.9387	14.1	6.21	174	0	0.335796	0.167898
2015-01-16 08:15:00	10.225				0.6222	1.0042	1.1844	14	5.74	183	6.58139	1.17529	0.503694
2015-01-16 08:30:00	10.46				0.7564	1.16255	1.1592	14.1	1.65	198	6.58132	3.02225	1.17532
2015-01-16 08:45:00	10.308				0.793	1.20574	1.3797	14.2	1.86	185	19.7438	4.36546	2.01483
2015-01-16 09:00:00	10.314				0.7442	1.14816	1.512	14.1	2.57	190	49.3594	7.55559	3.69385
2015-01-16 09:15:00	10.652				0.671	1.06178	1.8459	14.1	4.34	193	62.518	10.4102	4.53347
2015-01-16 09:30:00	10.37				0.8174	1.23453	1.2411	14.2	2.84	150	95.4161	14.1036	6.54812
2015-01-16 09:45:00	10.687				0.6954	1.09057	1.7388	14.2	3.73	148	108.575	17.7972	8.56281
2015-01-16 10:00:00	10.721				0.6344	1.01859	1.8522	14.2	1.86	130	82.2537	14.9432	7.55554
2015-01-16 10:15:00	10.687				0.8784	1.30651	1.5309	14.2	3.28	186	55.9315	10.0739	5.20485
2015-01-16 10:30:00	10.692				0.8662	1.29212	1.4931	13.7	1.99	219	42.7711	6.71592	3.86165
2015-01-16 10:45:00	10.749				0.5368	0.903424	1.4301	13.4	1.4	249	128.314	20.6515	11.2492
2015-01-16 11:00:00	10.709				0.6954	1.09057	1.3671	13.5	3.41	189	220.436	34.0833	19.3083
2015-01-16 11:15:00	10.83				0.5612	0.932216	1.3923	13.3	1	191	134.893	20.9872	12.0886
2015-01-16 11:30:00	10.818				0.6344	1.01859	1.4175	13	1.69	232	115.153	19.812	11.585
2015-01-16 11:45:00	10.818				0.793	1.20574	1.4364	12.7	1.09	177	167.794	26.6958	15.9503
2015-01-16 12:00:00	10.807				0.7808	1.19134	1.4742	12.7	2.96	115	154.634	26.1921	15.7824
2015-01-16 12:15:00	10.675				0.7442	1.14816	1.3734	12.1	2.47	213	134.904	23.002	14.1034
2015-01-16 12:30:00	10.692				0.7076	1.10497	1.3923	11.5	2.4	198	128.319	24.1773	14.9429
2015-01-16 12:45:00	10.404				0.7076	1.10497	1.2285	11.4	2.54	238	134.905	25.8567	16.2863
2015-01-16 13:00:00	10.163				0.7198	1.11936	1.0017	11.3	2.04	234	161.239	30.0541	18.8048
2015-01-16 13:15:00	10.009	34.813	258.519	91.9921	0.9638	1.40728	0.9765	11.3	2.96	249	180.983	32.7405	20.3159
2015-01-16 13:30:00	9.9922	34.642	261.758	92.9943	1.1834	1.66641	0.9639	11.3	3.4	238	180.983	30.7254	18.8046
2015-01-16 13:45:00	9.9757	34.677	262.367	93.0645	1.0736	1.53685	0.9639	11.2	2.27	262	174.4	29.5502	17.9652
2015-01-16 14:00:00	9.9538	34.698	264.058	93.6885	1.3298	1.83916	0.9765	11.2	2.77	245	174.406	28.7106	17.4614
2015-01-16 14:15:00	9.9428	34.652	262.779	93.0234	1.0492	1.50806	0.9765	11.3	5.4	247	187.579	31.0611	18.4688
2015-01-16 14:30:00	9.9318	34.597	263.259	93.1325	0.9516	1.39289	0.9198	11.3	3.33	265	164.547	28.0394	16.2864
2015-01-16 14:45:00	9.9099	34.515	263.256	93.0272	1.0004	1.45047	0.9576	11.5	4	269	141.513	24.6822	14.1041
2015-01-16 15:00:00	9.9044	34.521	263.538	93.1127	0.9882	1.43608	0.9891	11.4	4.88	268	167.847	27.8732	15.6157
2015-01-16 15:15:00	9.9044	34.539	264.84	93.5857	1.0858	1.55124	0.9639	11.3	4.27	263	108.608	18.6385	9.90695
2015-01-16 15:30:00	9.899	34.545	267.016	94.3389	1.0736	1.53685	1.0458	10.9	6.05	256	95.4437	16.4561	8.56389
2015-01-16 15:45:00	9.899	34.535	267.691	94.5711	1.0492	1.50806	0.9765	10.6	5.01	265	141.516	23.6772	11.9226
2015-01-16 16:00:00	9.899	34.545	267.593	94.5423	1.1834	1.66641	1.0206	10.5	3.58	275	75.6966	13.6018	6.71695
2015-01-16 16:15:00	9.899	34.545	267.265	94.4267	1.1468	1.62322	0.9765	11.1	4.97	288	49.3674	8.3963	4.03022
2015-01-16 16:30:00	9.8935	34.54	268.261	94.7459	1.1834	1.66641	0.9702	10.9	4.19	285	26.3293	5.03778	2.35096
2015-01-16 16:45:00	9.8771	34.537	268.079	94.669	1.159	1.63762	0.9828	10.4	4.35	271	26.3292	4.03023	2.01511
2015-01-16 17:00:00	9.8661	34.548	268.471	94.714	1.159	1.63762	0.9513	9.9	3.71	266	13.1646	2.51889	1.17548
2015-01-16 17:15:00	9.8007	34.526	269.001	94.8274	1.2322	1.724	0.9261	10.1	3.54	268	19.747	1.84719	0.83963
2015-01-16 17:30:00	9.7464	34.504	270.197	95.1043	1.1468	1.62322	0.8379	10.1	5.88	268	13.1646	1.17551	0.503789
2015-01-16 17:45:00	9.6651	34.506	272.014	95.6031	1.281	1.78158	0.8442	10	4.47	258	0	0.167943	0.503828
2015-01-16 18:00:00	9.6489	34.503	273.467	96.0199	1.3664	1.88235	0.8505	10.1	6.49	268	0	0	0.16795
2015-01-16 18:15:00	9.703	34.526	270.205	95.0397	1.3054	1.81037	0.8694	9.3	5.2	246	0	0	0.335908
2015-01-16 18:30:00	9.7192	34.52	268.91	94.5907	1.3054	1.81037	0.8694	9.2	5.42	252	0	0	0.167954
2015-01-16 18:45:00	9.7138	34.554	270.07	95.0196	1.3298	1.83916	0.8505	9.2	5.58	256	0	0	0.335909
2015-01-16 19:00:00	9.7247	34.553	269.336	94.8413	1.2078	1.6952	0.9261	9.2	3.19	260	0	0	0.167954
2015-01-16 19:15:00	9.7464	34.56	269.581	94.9316	1.281	1.78158	0.9387	9.2	3.06	275	0	0	0.335917
2015-01-16 19:30:00	9.7247	34.571	269.929	94.9801	1.3298	1.83916	0.8568	9.1	2.45	292	0	0.167966	0.335932
2015-01-16 19:45:00	9.7247	34.571	269.977	94.997	1.3298	1.83916	0.9261	10	6.2	307	0	0	0.167973
2015-01-16 20:00:00	9.7192	34.567	267.603	94.1994	1.2078	1.6952	0.882	9.9	6.21	304	0	0	0.335952
2015-01-16 20:15:00	9.7572	34.559	266.295	93.7738	1.159	1.63762	0.9324	9.8	6.68	286	0	0	0.167981
2015-01-16 20:30:00	9.7355	34.57	266.604	93.8494	1.22	1.7096	0.882	9.7	8.45	286	0	0	0.335961
2015-01-16 20:45:00	9.6705	34.539	268.819	94.49	1.4152	1.93994	0.8442	9.7	9.53	294	0	0	0.167975
2015-01-16 21:00:00	9.5627	34.596	272.614	95.6353	1.4884	2.02631	0.8253	9.5	7.61	286	0	0.167972	0.335944
2015-01-16 21:15:00	9.5734	34.585	271.96	95.3991	1.4396	1.96873	0.8316	9.6	9.57	284	0	0	0.335959
2015-01-16 21:30:00	9.4769	34.565	273.795	95.7652	1.525	2.0695	0.7875	9.5	7.95	291	0	0	0.167978
2015-01-16 21:45:00	9.4021	34.477	273.682	95.5905	1.586	2.14148	0.7686	8.8	4.91	295	0	0	0.167974
2015-01-16 22:00:00	9.3808	34.488	273.673	95.533	1.5616	2.11269	0.7623	9.3	7.22	291	0	0	0.167978
2015-01-16 22:15:00	9.3223	34.43	274.527	95.7137	1.5982	2.15588	0.756	8.5	4.79	263	0	0	0.167979
2015-01-16 22:30:00	9.2852	34.409	275.349	95.9161	1.647	2.21346	0.7245	8.4	4.97	271	0	0	0.167979
2015-01-16 22:45:00	9.2429	34.384	276.008	96.0071	1.7202	2.29984	0.693	8.4	4.78	276	0	0	0.167981
2015-01-16 23:00:00	9.2587	34.416	275.472	95.8507	1.6348	2.19906	0.6993	8.1	5.62	280	0	0	0.167982
2015-01-16 23:15:00	9.264	34.43	274.735	95.6436	1.6958	2.27104	0.7056	8	5.94	268	0	0	0.167983
2015-01-16 23:30:00	9.264	34.449	274.47	95.5324	1.6958	2.27104	0.7371	8.3	4.58	285	0	0	0.167983
2015-01-16 23:45:00	9.2534	34.449	274.592	95.5852	1.5982	2.15588	0.693	7.9	4.88	268	0	0	0.167983
2015-01-17	9.2852	34.495	274.01	95.4615	1.586	2.14148	0.693	7.8	3.48	261	0	0	0.335965
2015-01-17 00:15:00	9.1532	34.394	276.213	95.9004	1.6348	2.19906	0.6804	7.7	4.47	279	0	0	0.167983
2015-01-17 00:30:00	9.1269	34.4	276.646	95.9624	1.7202	2.29984	0.6867	7.6	3.13	271	0	0	0.167983
2015-01-17 00:45:00	9.0797	34.341	277.77	96.2436	1.7568	2.34302	0.693	7.5	5.64	260	0	0.167983	0.167983
2015-01-17 01:00:00	9.0902	34.341	277.135	96.0544	1.586	2.14148	0.6615	7.5	4.83	263	0	0.167983	0.167983
2015-01-17 01:15:00	9.085	34.336	277.316	96.0952	1.7812	2.37182	0.6867	7.5	3.68	249	0	0	0.167983
2015-01-17 01:30:00	9.0745	34.327	277.712	96.2061	1.7812	2.37182	0.6678	7.4	3.02	273	0	0.167983	0.167983
2015-01-17 01:45:00	9.064	34.309	277.928	96.2285	1.708	2.28544	0.6678	7.3	2.64	268	0	0	0.167983
2015-01-17 02:00:00	9.064	34.309	278.393	96.3906	1.7568	2.34302	0.6615	7.4	1.57	259	0	0	0.167983
2015-01-17 02:15:00	9.0797	34.322	278.26	96.397	1.8422	2.4438	0.6741	7.2	2.11	262	0	0	0.167983
2015-01-17 02:30:00	9.0797	34.332	277.464	96.13	1.9398	2.55896	0.6867	7.1	3.29	259	0	0	0.167983
2015-01-17 02:45:00	9.0692	34.323	276.563	95.7656	1.9886	2.61655	0.6678	7.2	3.68	254	0	0.167983	0.335965
2015-01-17 03:00:00	9.0535	34.328	275.161	95.2934	1.586	2.14148	0.6174	7	2.7	254	0	0.167983	0.167983
2015-01-17 03:15:00	9.1795	34.388	278.324	96.6951	1.952	2.57336	0.6552	7.1	2.41	276	0	0	0.167983
2015-01-17 03:30:00	9.2376	34.408	279.107	97.1252	1.8544	2.45819	0.6741	7.5	3.23	275	0	0	0.335965
2015-01-17 03:45:00	9.169	34.388	277.813	96.5287	1.891	2.50138	0.6804	7.9	3.45	297	0	0	0.167984
2015-01-17 04:00:00	9.264	34.43	278.614	96.8436	1.8788	2.48698	0.6741	8.3	5.26	302	0	0	0.167983
2015-01-17 04:15:00	9.2006	34.415	278.192	96.6876	1.6348	2.19906	0.6804	8.4	6.49	304	0	0	0.167983
2015-01-17 04:30:00	9.1954	34.401	277.454	96.3812	1.647	2.21346	0.7749	8.5	7.87	301	0	0	0.335965
2015-01-17 04:45:00	8.9544	34.338	271.225	93.7079	1.4518	1.98312	0.7245	8.4	6.34	301	0	0	0.335965
2015-01-17 05:00:00	8.9908	34.36	272.271	94.161	1.4518	1.98312	0.6993	8.3	6.25	295	0	0	0.167983
2015-01-17 05:15:00	9.0378	34.372	272.481	94.3386	1.464	1.99752	0.6804	8.2	5.36	276	0	0.167983	0.335965
2015-01-17 05:30:00	9.0692	34.37	274.119	95.0041	1.6958	2.27104	0.6552	7.9	4.17	269	0	0	0.335965
2015-01-17 05:45:00	9.1112	34.387	275.13	95.3938	1.7202	2.29984	0.6993	8.1	7.52	269	0	0	0.335965
2015-01-17 06:00:00	9.085	34.384	274.868	95.2173	1.5982	2.15588	0.6363	8.3	7.92	287	0	0.167983	0.167983
2015-01-17 06:15:00	9.0745	34.384	274.379	95.0515	1.5738	2.12708	0.6741	8.6	6.88	284	0	0.167983	0.335965
2015-01-17 06:30:00	9.085	34.403	274.546	95.1222	1.4762	2.01192	0.6741	8.6	8.94	287	0	0.167983	0.335965
2015-01-17 06:45:00	9.0274	34.373	273.014	94.4804	1.3542	1.86796	0.7056	8.6	11.51	287	0	0.167983	0.167983
2015-01-17 07:00:00	9.0065	34.374	273.399	94.6207	1.5372	2.0839	0.6993	8.5	6.47	289	0	0.335965	0.167983
2015-01-17 07:15:00	9.0535	34.405	273.548	94.7397	1.4396	1.96873	0.6678	8.5	7.86	298	0	0	0.335965
2015-01-17 07:30:00	9.0797	34.418	274.207	95.0462	1.5128	2.0551	0.6426	8.6	6.58	297	0	0	0.335965
2015-01-17 07:45:00	9.085	34.422	274.159	95.0322	1.5372	2.0839	1.9593	8.4	6.21	295	0	0	0.335965
2015-01-17 08:00:00	8.9961	34.393	272.997	94.5309	1.6104	2.17027	0.693	8.1	3.81	301	0	0.167983	0.335965
2015-01-17 08:15:00	8.9544	34.396	270.869	93.6255	1.281	1.78158	0.6804	7.9	3.38	273	13.1647	2.35176	1.00789
2015-01-17 08:30:00	8.9856	34.384	270.759	93.5703	1.342	1.85356	0.7371	7.6	3.09	296	36.2028	6.38334	2.68772
2015-01-17 08:45:00	8.9232	34.388	270.127	93.2844	1.1956	1.68081	0.6993	7.8	4.69	303	62.5322	12.2627	4.53553
2015-01-17 09:00:00	8.9232	34.397	269.39	93.0364	1.1956	1.68081	0.7056	8	6.21	294	95.4467	19.15	7.39123
2015-01-17 09:15:00	8.8557	34.396	266.416	91.8624	1.159	1.63762	0.6678	8.1	10.8	299	266.596	27.3812	11.2548
2015-01-17 09:30:00	8.8557	34.396	263.956	91.0144	1.098	1.56564	0.6993	8.3	5.87	297	352.159	36.6202	15.7904
2015-01-17 09:45:00	8.8247	34.397	264.065	91.0122	0.9882	1.43608	0.6804	8.5	9.92	301	437.725	45.8592	20.3259
2015-01-17 10:00:00	8.8143	34.436	267.349	92.1368	1.098	1.56564	0.693	8.7	6.36	301	510.131	55.2663	25.5333
2015-01-17 10:15:00	8.7988	34.393	265.849	91.5454	0.8174	1.23453	0.6678	8.8	9.51	304	585.827	64.6733	30.9088
2015-01-17 10:30:00	8.7627	34.399	268.814	92.6493	0.8906	1.32091	0.6741	8.8	5.95	299	674.689	74.5842	36.6202
2015-01-17 10:45:00	8.7834	34.408	266.384	91.7386	0.7564	1.16255	0.6426	9	7.84	322	727.348	82.8154	41.9956
2015-01-17 11:00:00	8.8454	34.492	268.932	92.7753	0.9028	1.3353	0.6615	9	7.5	305	812.918	92.0464	47.3669
2015-01-17 11:15:00	8.8402	34.487	269.016	92.8509	0.854	1.27772	0.6426	9	9.7	311	852.412	98.4223	52.0664
2015-01-17 11:30:00	8.8299	34.478	270.032	93.1564	0.7808	1.19134	0.6552	9	7.3	310	898.488	105.308	56.7686
2015-01-17 11:45:00	8.8868	34.49	270.375	93.3317	0.793	1.20574	0.6741	9	7.08	318	957.729	112.193	61.4709
2015-01-17 12:00:00	8.8713	34.486	271.354	93.7473	0.7686	1.17695	0.7056	9.1	8.57	317	1010.39	117.903	64.8297
2015-01-17 12:15:00	8.9492	34.477	271.738	93.9449	0.793	1.20574	0.6678	9.1	8.01	304	1003.81	119.908	67.1753
2015-01-17 12:30:00	8.8764	34.462	271.846	94.0132	0.7808	1.19134	0.6489	9.1	7.21	307	1003.81	121.077	68.5153
2015-01-17 12:45:00	9.0065	34.479	272.194	94.2545	0.7198	1.11936	0.6678	9.2	5.48	312	984.059	120.403	57.2629
2015-01-17 13:00:00	9.0274	34.478	273.105	94.6198	0.7198	1.11936	0.6867	9.3	9.77	301	997.223	121.914	69.5214
2015-01-17 13:15:00	9.0483	34.515	273.353	94.7689	0.6954	1.09057	0.7119	9.3	7.36	300	984.059	119.899	68.3459
2015-01-17 13:30:00	9.0745	34.508	274.493	95.2205	0.7076	1.10497	0.7623	9.4	7.85	283	964.286	117.212	66.3308
2015-01-17 13:45:00	9.1059	34.449	276.054	95.7858	0.7442	1.14816	0.7308	9.5	7.31	305	944.546	114.526	63.8119
2015-01-17 14:00:00	9.0588	34.571	275.333	95.6101	0.7442	1.14816	0.6804	9.7	8.87	310	181.012	106.297	60.7893
2015-01-17 14:15:00	9.1164	34.477	277.871	96.464	0.793	1.20574	0.6804	9.6	8.57	314	885.318	104.618	43.8287
2015-01-17 14:30:00	9.1112	34.463	282.163	97.9249	0.8052	1.22014	0.6804	9.6	7.13	313	714.175	91.6869	49.3699
2015-01-17 14:45:00	9.085	34.355	286.288	99.2448	1.0126	1.46487	0.7497	9.5	7.4	329	549.618	76.9101	40.9739
2015-01-17 15:00:00	9.0797	34.332	288.253	99.9015	0.9272	1.3641	0.7056	9.6	5.88	306	707.6	79.597	40.3023
2015-01-17 15:15:00	9.0902	34.331	288.271	99.9077	0.854	1.27772	0.6741	9.8	10.33	312	872.158	81.6121	38.9588
2015-01-17 15:30:00	9.0902	34.331	289.254	100.268	0.9882	1.43608	0.6552	9.9	6.59	316	753.647	72.2082	33.4173
2015-01-17 15:45:00	9.1007	34.331	290.498	100.699	1.0614	1.52245	0.6615	10	6.12	322	668.082	59.2779	26.5323
2015-01-17 16:00:00	9.0954	34.297	292.559	101.392	1.0126	1.46487	0.6426	10.1	8.1	307	582.534	48.3627	20.8228
2015-01-17 16:15:00	9.085	34.289	293.025	101.517	1.0858	1.55124	0.6552	9.8	5.58	312	299.496	32.5777	13.9379
2015-01-17 16:30:00	9.064	34.261	293.723	101.686	1.098	1.56564	0.6426	9.8	5.29	316	273.167	24.3492	9.90761
2015-01-17 16:45:00	9.0431				1.0858	1.55124	0.6363	9.9	4.51	311	233.673	17.4642	6.71702
2015-01-17 17:00:00	9.0274				1.159	1.63762	0.6363	9.6	4.07	315	115.191	11.5869	4.36608
2015-01-17 17:15:00	8.9856				1.1224	1.59443	0.6237	9.4	3.57	306	52.6586	6.54912	2.68682
2015-01-17 17:30:00	8.9596				1.098	1.56564	0.6174	9.3	3.39	312	19.747	3.02267	1.17548
2015-01-17 17:45:00	8.944				1.1834	1.66641	0.6237	9.1	3.07	298	6.58233	0.671704	0.335852
2015-01-17 18:00:00	8.9388				1.2078	1.6952	0.63	8.9	3.25	293	0	0.167931	0.335862
2015-01-17 18:15:00	8.918				1.3542	1.86796	0.6174	8.7	3.47	277	0	0	0.167947
2015-01-17 18:30:00	8.9076				1.22	1.7096	0.5985	8.5	3.27	291	0	0	0.335907
2015-01-17 18:45:00	8.8764				1.1834	1.66641	0.6111	8.3	3.55	305	0	0	0.167958
2015-01-17 19:00:00	8.8661				1.2078	1.6952	0.6237	7.9	3.83	301	0	0	0.335948
2015-01-17 19:15:00	8.835				1.2078	1.6952	0.63	7.5	3.19	6	0	0	0.167981
2015-01-17 19:30:00	8.8247				1.1712	1.65202	0.6741	7.5	3.44	330	0	0	0.335965
2015-01-17 19:45:00	8.8092				1.2078	1.6952	0.6237	7.8	4.23	304	0	0	0.335965
2015-01-17 20:00:00	8.7937				1.1712	1.65202	0.6237	7.9	4.67	314	0	0	0.167983
2015-01-17 20:15:00	8.7834				1.1102	1.58004	0.6237	7.5	5.46	296	0	0.167983	0.335965
2015-01-17 20:30:00	8.7679				1.1224	1.59443	0.63	7.2	4.74	295	0	0	0.335965
2015-01-17 20:45:00	8.7319				1.1468	1.62322	0.63	7.2	3.3	298	0	0	0.335965
2015-01-17 21:00:00	8.7062				1.1956	1.68081	0.63	7.2	4.4	291	0	0.167983	0.335965
2015-01-17 21:15:00	8.6805				1.1468	1.62322	0.6363	6.9	5.09	289	0	0.167983	0.167983
2015-01-17 21:30:00	8.66				1.098	1.56564	0.6237	7.3	5.97	306	0	0	0.167983
2015-01-17 21:45:00	8.6344				1.037	1.49366	0.6237	7	4.11	277	0	0	0.335965
2015-01-17 22:00:00	8.6139				1.037	1.49366	0.63	6.6	2.53	282	0	0	0.167983
2015-01-17 22:15:00	8.5782				1.0614	1.52245	0.6174	7.1	4.06	309	0	0	0.33597
2015-01-17 22:30:00	8.5629				1.0614	1.52245	0.63	7.1	4.23	308	0	0.167986	0.335972
2015-01-17 22:45:00	8.5374				1.0736	1.53685	0.6678	6.8	2.95	289	0	0	0.167994
2015-01-17 23:00:00	8.5272				1.0614	1.52245	0.6363	6.8	3.36	325	0	0	0.335995
2015-01-17 23:15:00	8.5069				1.0492	1.50806	0.6426	6.6	1.66	327	0	0	0.335996
2015-01-17 23:30:00	8.4865				1.0614	1.52245	0.6489	7	4.02	331	0	0	0.33603
2015-01-17 23:45:00	8.4662				1.0614	1.52245	0.6237	6.5	2.85	354	0	0	0.168015
2015-01-18	8.451				1.0736	1.53685	0.6426	6.5	1.98	275	0	0	0.168017
2015-01-18 00:15:00	8.3752				1.2688	1.76718	0.6615	5.9	0.79	211	0	0	0.336047
2015-01-18 00:30:00	8.3752				1.281	1.78158	0.6615	6.7	1.34	301	0	0	0.336049
2015-01-18 00:45:00	8.3701				1.22	1.7096	0.6363	6.5	0.86	319	0	0	0.168033
2015-01-18 01:00:00	8.3903				1.1834	1.66641	0.6741	5	2.1	252	0	0.168033	0.336066
2015-01-18 01:15:00	8.451				1.2444	1.73839	0.6678	5.2	1.95	245	0	0	0.336064
2015-01-18 01:30:00	8.4257				1.1834	1.66641	0.6867	5.7	2.51	257	0	0.168026	0.168026
2015-01-18 01:45:00	8.4156				1.1956	1.68081	0.6489	5.3	1.36	240	0	0	0.336043
2015-01-18 02:00:00	8.4105				1.2078	1.6952	0.693	5.3	2.26	254	0	0.336058	0.336058
2015-01-18 02:15:00	8.4713				1.2566	1.75279	0.6804	4.7	0.71	222	0	0.336074	0.168037
2015-01-18 02:30:00	8.4561				1.2444	1.73839	0.7056	4.5	0.66	213	0	0	0.336076
2015-01-18 02:45:00	8.4561				1.3298	1.83916	0.7245	4.7	0.63	242	0	0	0.336078
2015-01-18 03:00:00	8.4561				1.2688	1.76718	0.6426	5	0.79	114	0	0	0.168039
2015-01-18 03:15:00	8.6088				1.281	1.78158	0.6804	4.7	2.4	94	0	0	0.168039
2015-01-18 03:30:00	8.5629				1.2688	1.76718	0.6552	4.1	1.14	133	0	0	0.168039
2015-01-18 03:45:00	8.517				1.3786	1.89675	0.7245	4	0.58	103	0	0.168039	0.336078
2015-01-18 04:00:00	8.6651				1.3298	1.83916	0.6867	4.3	1.76	74	0	0	0.336078
2015-01-18 04:15:00	8.3247				1.1712	1.65202	0.6615	3.9	0.54	351	0	0	0.336078
2015-01-18 04:30:00	8.2845				1.1346	1.60883	0.6678	3.8	0.18	159	0	0	0.336078
2015-01-18 04:45:00	8.3147				1.1468	1.62322	0.6426	3.8	0.88	19	0	0.168039	0.168039
2015-01-18 05:00:00	8.1943				1.1712	1.65202	0.6489	2.9	1.98	348	0	0	0.168039
2015-01-18 05:15:00	8.1793				1.1224	1.59443	0.63	3.1	0.4	345	0	0.336082	0.168041
2015-01-18 05:30:00	8.1643				1.1346	1.60883	0.6426	3.3	1.24	338	0	0	0.168041
2015-01-18 05:45:00	8.1893				1.0492	1.50806	0.6741	3.5	1.9	6	0	0	0.16806
2015-01-18 06:00:00	8.2093				1.1468	1.62322	0.6615	4	3.11	2	0	0	0.336147
2015-01-18 06:15:00	8.1843				1.0858	1.55124	0.6867	4	1.65	9	0	0	0.168081
2015-01-18 06:30:00	8.2343				1.0248	1.47926	0.7371	4.1	1.08	28	0	0	0.168087
2015-01-18 06:45:00	8.2394				1.0126	1.46487	0.7245	4.3	1.37	352	0	0.33615	0.168075
2015-01-18 07:00:00	8.568				0.915	1.3497	0.9639	4.5	0.52	76	0	0.16807	0.336141
2015-01-18 07:15:00	8.2946				0.9516	1.39289	0.7434	4.4	0.62	15	0	0	0.168055
2015-01-18 07:30:00	8.4662				0.9882	1.43608	0.7623	4.5	0.86	137	0	0.336092	0.168046
2015-01-18 07:45:00	8.2644				0.9272	1.3641	0.8064	5.3	2.62	81	0	0	0.336085
2015-01-18 08:00:00	8.4865				0.9028	1.3353	0.8316	5.3	2.93	83	0	0.168039	0.336079
2015-01-18 08:15:00	8.8713				0.8418	1.26332	1.0269	5.1	2.66	87	13.1711	1.34431	0.672156
2015-01-18 08:30:00	8.7627				0.7686	1.17695	1.0143	5	2.82	92	52.6822	4.20097	1.84843
2015-01-18 08:45:00	8.7524				0.7686	1.17695	1.1088	4.7	2.95	104	75.7234	10.7545	4.03294
2015-01-18 09:00:00	8.9388				0.793	1.20574	1.1403	4.6	3.45	67	82.3064	15.9637	6.72156
2015-01-18 09:15:00	9.0954				0.854	1.27772	1.2033	4.4	3.55	70	141.567	23.8615	10.0823
2015-01-18 09:30:00	9.1322				0.8296	1.24893	1.1592	4.2	4.94	62	306.179	34.1119	14.4514
2015-01-18 09:45:00	9.0013				0.8174	1.23453	1.0143	4.5	3.66	83	530.052	48.7313	21.341
2015-01-18 10:00:00	8.619				0.8906	1.32091	0.9009	4.4	7.07	76	319.348	45.8747	21.677
2015-01-18 10:15:00	8.4561				0.9882	1.43608	0.8505	4.2	4.82	69	194.243	47.0491	24.5328
2015-01-18 10:30:00	8.6088				1.098	1.56564	0.9072	4.2	4.16	60	451.038	55.2829	27.7254
2015-01-18 10:45:00	8.7319				0.7686	1.17695	0.9576	4.7	7.37	70	977.798	79.4741	38.3089
2015-01-18 11:00:00	8.701				1.1834	1.66641	0.9198	5.3	5.95	54	345.686	66.8735	37.4693
2015-01-18 11:15:00	8.6088				1.1346	1.60883	0.8694	5.3	5.86	57	490.545	76.9576	43.6877
2015-01-18 11:30:00	8.6292				0.976	1.42168	0.882	5.4	6.09	73	444.442	70.739	40.6623
2015-01-18 11:45:00	8.619				1.0004	1.45047	0.8253	5.6	6.34	73	566.258	76.7834	43.8522
2015-01-18 12:00:00	8.6088				0.7198	1.11936	0.8001	6	5.8	61	707.754	93.0723	53.9282
2015-01-18 12:15:00	8.2946				1.1224	1.59443	0.8064	6.1	6.57	57	536.56	78.6167	46.8677
2015-01-18 12:30:00	8.1893				0.8906	1.32091	0.6993	6.1	5.08	49	628.717	83.9914	49.051
2015-01-18 12:45:00	8.1593				0.6588	1.04738	0.6741	6.6	6.77	69	1063.19	113.052	63.8334
2015-01-18 13:00:00	8.1943				0.7564	1.16255	0.6489	6.7	7.33	57	608.904	96.59	59.1299
2015-01-18 13:15:00	8.1943				0.7076	1.10497	0.7056	6.8	8.77	58	740.517	105.157	63.6654
2015-01-18 13:30:00	8.2043				0.5978	0.975404	0.6426	7.2	7.02	69	1013.68	119.436	69.7128
2015-01-18 13:45:00	8.2093				0.9516	1.39289	0.6426	7.2	8.67	57	391.649	72.4005	44.6834
2015-01-18 14:00:00	8.2293				0.7686	1.17695	0.6552	7.5	7.36	53	674.689	95.2445	54.2574
2015-01-18 14:15:00	8.2745				0.8296	1.24893	0.6111	7.4	6.93	62	648.36	82.6464	43.6749
2015-01-18 14:30:00	8.2795				0.9882	1.43608	0.6615	7.5	6.66	59	358.737	65.5081	38.297
2015-01-18 14:45:00	8.3046				0.793	1.20574	0.6363	7.7	7.71	42	918.235	95.4083	50.8956
2015-01-18 15:00:00	8.3348				0.7564	1.16255	0.6489	8	7.2	61	733.93	77.2686	40.818
2015-01-18 15:15:00	8.3096				0.915	1.3497	0.7119	8	6.49	59	286.331	52.2395	28.8913
2015-01-18 15:30:00	8.3247				1.0248	1.47926	0.6489	8.2	6.48	69	737.221	62.8169	30.0648
2015-01-18 15:45:00	8.3096				1.0004	1.45047	0.6804	8.3	3.19	78	575.954	55.2579	25.6975
2015-01-18 16:00:00	8.3247				0.8906	1.32091	0.6489	8.3	5.53	55	378.484	42.8284	19.4827
2015-01-18 16:15:00	8.3701				0.8296	1.24893	0.6615	8.4	7.49	60	220.508	31.9113	14.1082
2015-01-18 16:30:00	8.3651				0.8906	1.32091	0.7371	8.4	5.34	70	207.343	25.0252	10.4132
2015-01-18 16:45:00	8.355				1.0004	1.45047	0.6741	8.3	4.55	60	227.09	19.3148	7.38999
2015-01-18 17:00:00	8.3651				1.0004	1.45047	0.7056	8.3	4.16	58	82.2791	12.7645	4.70272
2015-01-18 17:15:00	8.3046				0.9516	1.39289	0.63	8.1	3.6	45	36.2028	6.88613	3.02318
2015-01-18 17:30:00	8.3147				0.793	1.20574	0.7182	7.8	2.2	38	13.1647	3.02318	1.34363
2015-01-18 17:45:00	8.3348				0.9028	1.3353	0.8379	7.5	3.57	15	6.58233	0.671817	0.335909
2015-01-18 18:00:00	8.3247				0.915	1.3497	0.8379	7.3	2.45	28	0	0	0.335929
2015-01-18 18:15:00	8.2996	34.086	293.373	99.9405	0.9272	1.3641	0.8505	7.1	1.4	33	0	0	0.167977
2015-01-18 18:30:00	8.7164	34.329	289.038	99.4364	1.098	1.56564	0.9387	7.1	1.27	330	0	0.167982	0.167982
2015-01-18 18:45:00	8.1544	34.023	290.461	98.5681	1.0858	1.55124	0.7119	7.1	1.81	359	0	0	0.167982
2015-01-18 19:00:00	8.6292	34.134	291.401	100.478	1.0614	1.52245	0.9891	6.8	1.88	27	0	0.167983	0.335965
2015-01-18 19:15:00	8.3046	34.101	285.224	98.264	1.1346	1.60883	1.0206	6.6	3.01	351	0	0	0.167983
2015-01-18 19:30:00	8.7524	34.515	287.682	98.3203	0.915	1.3497	0.7182	6.7	2.92	4	0	0.335965	0.335965
2015-01-18 19:45:00	8.4409	34.463	285.424	98.4885	1.1346	1.60883	1.0269	6.5	3.8	5	0	0	0.335965
2015-01-18 20:00:00	8.2694	34.125	290.272	98.6883	1.098	1.56564	0.7371	6.3	3.02	12	0	0	0.335965
2015-01-18 20:15:00	8.1943	34.101	291.903	99.1106	1.0614	1.52245	0.7434	6.5	4.41	14	0	0	0.167983
2015-01-18 20:30:00	8.2243	34.121	292.191	99.1364	1.1102	1.58004	0.7371	6.6	2.08	349	0	0	0.335969
2015-01-18 20:45:00	8.1643	34.111	290.482	98.4666	1.1102	1.58004	0.7686	6.8	1.29	36	0	0.167986	0.167986
2015-01-18 21:00:00	8.1544	34.121	290.551	98.4248	1.0248	1.47926	0.7308	6.8	3.46	1	0	0	0.167994
2015-01-18 21:15:00	8.0846	34.091	290.75	98.3585	1.0004	1.45047	0.7623	6.9	1.84	354	0	0	0.336019
2015-01-18 21:30:00	8.0846	34.11	290.722	98.2888	1.0248	1.47926	0.819	6.7	2.79	0	0	0	0.168007
2015-01-18 21:45:00	8.0251	34.081	292.933	98.9783	0.9882	1.43608	0.9324	6.8	1	323	0	0	0.336051
2015-01-18 22:00:00	7.9855	34.08	297.346	100.298	0.9394	1.37849	1.197	6.5	1.99	6	0	0	0.168025
2015-01-18 22:15:00	7.9707	34.075	298.796	100.871	0.9516	1.39289	1.1403	6.4	3.96	355	0	0	0.168025
2015-01-18 22:30:00	7.877	34.049	299.599	101.049	0.9394	1.37849	1.1025	6.6	1.96	330	0	0.168033	0.336065
2015-01-18 22:45:00	8.0449	34.11	298.128	101.061	1.0858	1.55124	1.3167	6.4	2.82	2	0	0	0.336054
2015-01-18 23:00:00	8.1045	34.198	299.136	101.177	1.0004	1.45047	1.0962	6.2	1.24	1	0	0	0.33606
2015-01-18 23:15:00	7.9657	34.129	298.062	100.747	0.9882	1.43608	1.2852	6.3	2.23	14	0	0	0.168035
2015-01-18 23:30:00	8.2795	34.349	287.671	97.8991	1.1224	1.59443	1.4112	6.5	4.85	358	0	0	0.168038
2015-01-18 23:45:00	8.3651	34.256	284.293	97.2125	0.9516	1.39289	1.6128	7.4	1	28	0	0	0.168035
2015-01-19	8.5833	34.594	280.136	96.1342	1.0492	1.50806	1.3167	11.5	2.4	210	0	0.168031	0.168031
2015-01-19 00:15:00	8.7473	34.626	276.76	95.3522	1.1834	1.66641	1.0332	11.7	2.84	180	0	0	0.336035
2015-01-19 00:30:00	8.737	34.617	276.677	95.2703	1.1468	1.62322	1.1088	11.4	3.39	174	0	0.167987	0.335974
2015-01-19 00:45:00	8.6702	34.596	276.715	95.2016	1.1346	1.60883	1.0647	11.3	3.76	169	0	0.335966	0.167983
2015-01-19 01:00:00	8.619	34.559	274.943	94.4083	1.1102	1.58004	1.0521	11.1	3.82	177	0	0	0.167983
2015-01-19 01:15:00	8.619	34.53	278.363	95.5611	1.3054	1.81037	1.071	11.1	4.71	205	0	0	0.335965
2015-01-19 01:30:00	8.6395	34.577	278.743	95.7915	1.1956	1.68081	1.0332	11.1	2.95	195	0	0	0.16798
2015-01-19 01:45:00	8.6292	34.539	278.618	95.6838	1.3054	1.81037	1.0584	10.8	2.71	160	0	0.335936	0.167968
2015-01-19 02:00:00	8.6292	34.559	278.15	95.5354	1.3054	1.81037	1.071	10.4	2.82	196	0	0	0.335926
2015-01-19 02:15:00	8.6292	34.568	278.315	95.618	1.3298	1.83916	1.0269	9.9	3.06	190	0	0	0.167958
2015-01-19 02:30:00	8.6548	34.582	277.609	95.4863	1.403	1.92554	0.9954	10	3.03	205	0	0	0.167958
2015-01-19 02:45:00	8.7627	34.611	277.408	95.5885	1.5128	2.0551	0.9891	9.8	2.12	183	0	0	0.335912
2015-01-19 03:00:00	8.7937	34.619	277.292	95.6658	1.5128	2.0551	0.9072	10.3	3.51	172	0	0.167955	0.335909
2015-01-19 03:15:00	8.8143	34.618	276.933	95.5415	1.464	1.99752	0.9198	10.6	1.84	125	0	0.335909	0.335909
2015-01-19 03:30:00	8.8092	34.614	277.341	95.6796	1.4518	1.98312	0.945	10.9	2.56	171	0	0	0.335913
2015-01-19 03:45:00	8.804	34.599	277.971	95.8673	1.4152	1.93994	0.9513	11.1	4.63	242	0	0.167955	0.167955
2015-01-19 04:00:00	8.8092	34.594	277.368	95.6768	1.4152	1.93994	0.9198	11.1	2.22	210	0	0	0.167957
2015-01-19 04:15:00	8.8092	34.604	271.694	93.8058	1.2322	1.724	0.8568	10.3	2.49	186	0	0	0.167955
2015-01-19 04:30:00	8.8299	34.613	273.271	94.3558	1.342	1.85356	0.8505	10.1	3.01	152	0	0	0.167954
2015-01-19 04:45:00	8.8402	34.651	271.875	93.9971	1.342	1.85356	0.9324	10.2	4.32	164	0	0	0.335909
2015-01-19 05:00:00	8.8764	34.663	270.28	93.323	1.1834	1.66641	0.8946	10.6	2.6	197	0	0	0.167954
2015-01-19 05:15:00	8.9024	34.705	268.786	93.0212	1.1224	1.59443	0.9513	10.1	6.45	201	0	0	0.167954
2015-01-19 05:30:00	8.918	34.709	269.645	93.3604	1.1224	1.59443	0.9891	10	1.62	194	0	0	0.335909
2015-01-19 05:45:00	8.9648	34.74	269.818	93.559	1.1102	1.58004	1.0017	10.2	4.62	175	0	0	0.167956
2015-01-19 06:00:00	8.9492	34.726	269.727	93.469	1.1712	1.65202	0.9765	10	1.12	159	0	0	0.335915
2015-01-19 06:15:00	8.9492	34.697	269.881	93.4352	1.2322	1.724	0.9576	10.1	2.42	200	0	0	0.167962
2015-01-19 06:30:00	8.9752	34.71	270.886	93.7709	1.1712	1.65202	0.9072	10.1	0.44	235	0	0	0.167962
2015-01-19 06:45:00	8.8972	34.691	270.658	93.6202	1.1468	1.62322	0.9765	9.7	3.04	257	0	0	0.167963
2015-01-19 07:00:00	8.9492	34.755	269.432	93.5739	1.1712	1.65202	0.9639	9.5	2.08	208	0	0	0.167977
2015-01-19 07:15:00	9.0378	34.792	267.206	92.8823	1.0248	1.47926	0.9198	9.2	2.8	257	0	0	0.33596
2015-01-19 07:30:00	8.97	34.677	266.96	92.5007	1.1102	1.58004	1.0143	9.1	2.38	239	0	0.167977	0.335954
2015-01-19 07:45:00	8.8764	34.644	265.862	92.0908	1.0126	1.46487	0.9324	8.9	1.59	205	0	0.16798	0.16798
2015-01-19 08:00:00	8.8609	34.736	266.48	92.3597	1.1346	1.60883	0.9387	8.2	2.24	268	0	0	0.167982
2015-01-19 08:15:00	8.9961	34.833	266.379	92.698	1.037	1.49366	0.9639	7.8	1.57	254	3.29117	0.503947	0.503947
2015-01-19 08:30:00	9.2323	34.945	262.683	91.7414	0.8418	1.26332	1.0269	7.6	1.17	268	6.58233	1.34386	0.839912
2015-01-19 08:45:00	9.169	35.017	260.933	91.1432	0.9394	1.37849	0.9828	7.5	0.82	269	13.1647	2.18377	1.00789
2015-01-19 09:00:00	9.3064	34.968	260.042	91.0159	0.8052	1.22014	1.1655	7.5	1.25	313	19.747	3.52763	1.67982
2015-01-19 09:15:00	9.1848	34.887	259.667	90.8473	0.732	1.13376	1.1403	7.6	0.93	336	32.9117	5.20746	2.68772
2015-01-19 09:30:00	9.2217	34.946	259.11	91.0925	0.7198	1.11936	1.5876	7.5	0.62	239	42.7852	7.05526	3.8636
2015-01-19 09:45:00	9.0013	34.847	259.346	91.0113	0.793	1.20574	1.3545	7.4	0.46	246	42.7852	10.079	4.87149
2015-01-19 10:00:00	8.9648	34.845	258.973	90.8403	0.6588	1.04738	1.4994	7.4	0.37	299	62.5322	12.4307	6.38333
2015-01-19 10:15:00	8.8661	34.644	259.397	90.6021	0.671	1.06178	1.4994	7.3	0.66	314	49.3675	11.4228	5.87939
2015-01-19 10:30:00	8.7319	34.632	266.348	91.565	0.8906	1.32091	0.9702	7.3	0.9	280	46.0766	10.4149	5.71141
2015-01-19 10:45:00	8.6139	34.516	266.379	91.4674	0.915	1.3497	0.9513	7.3	2.31	16	108.612	23.5175	12.9346
2015-01-19 11:00:00	8.5374	34.349	267.031	91.4358	1.037	1.49366	0.9639	7.2	3.72	16	125.065	26.5412	15.2864
2015-01-19 11:15:00	8.5374	34.291	267.042	91.3655	0.9516	1.39289	0.9135	7.2	3.48	3	115.191	25.1974	14.9504
2015-01-19 11:30:00	8.5629	34.315	266.823	91.3734	1.0126	1.46487	0.945	7.2	3.09	1	121.773	24.8614	14.9504
2015-01-19 11:45:00	8.6037	34.333	267.522	91.6922	0.9272	1.3641	0.9954	7.3	2.46	28	102.029	22.1737	13.2706
2015-01-19 12:00:00	8.6088	34.337	268.939	92.1709	0.976	1.42168	1.0521	7.3	1.72	23	181.015	38.3	24.0215
2015-01-19 12:15:00	8.4561	34.273	267.68	91.4263	0.8296	1.24893	1.0017	7.4	2.14	339	121.776	26.8772	16.6303
2015-01-19 12:30:00	8.4916	34.297	267.474	91.4209	0.8784	1.30651	1.008	7.4	1.14	343	85.5718	19.8219	12.2627
2015-01-19 12:45:00	8.517	34.292	266.459	91.1487	0.7808	1.19134	0.9891	7.5	1.08	7	148.103	36.4522	23.6855
2015-01-19 13:00:00	8.5374	34.32	264.743	90.5785	0.8052	1.22014	1.0143	7.5	3.01	334	88.8667	21.8377	13.9426
2015-01-19 13:15:00	8.4662	34.302	263.763	90.155	0.8052	1.22014	0.9765	7.3	3.26	287	36.203	8.73509	5.54342
2015-01-19 13:30:00	8.4815	34.239	262.773	89.8558	0.8174	1.23453	0.9513	6.9	1.96	246	42.7852	10.7509	6.55132
2015-01-19 13:45:00	8.4662	34.148	268.677	91.7023	1.0004	1.45047	1.0899	7	1.92	314	52.66	12.9346	7.89518
2015-01-19 14:00:00	8.517	34.34	263.954	90.2415	0.9516	1.39289	1.0269	7	1.86	318	69.1165	16.7982	10.2469
2015-01-19 14:15:00	8.6088	34.26	268.034	91.8661	1.159	1.63762	1.0521	7	2.37	344	65.8248	15.9583	9.23904
2015-01-19 14:30:00	8.7885	34.269	274.893	94.5161	1.5494	2.09829	0.9009	7.1	2.33	346	108.615	24.8614	14.6145
2015-01-19 14:45:00	8.619	34.241	279.18	95.6649	1.7202	2.29984	0.9135	7.1	2.22	318	161.275	36.9562	21.1658
2015-01-19 15:00:00	8.619	34.173	279.309	95.6586	2.0374	2.67413	0.8064	7.3	3.54	311	236.985	51.2347	28.725
2015-01-19 15:15:00	8.6548	34.254	281.401	96.4981	2.1106	2.76051	0.8064	7.4	3.19	311	210.642	46.6991	25.5333
2015-01-19 15:30:00	8.66	34.24	280.386	96.1503	1.9886	2.61655	0.8631	7.5	3.4	325	177.727	38.9719	20.6619
2015-01-19 15:45:00	8.6702	34.249	281.641	96.6046	1.9154	2.53017	0.8442	7.5	3.61	307	141.52	31.9167	16.4623
2015-01-19 16:00:00	8.66	34.24	281.424	96.5235	1.891	2.50138	0.819	7.6	4.66	321	115.191	26.2053	12.7667
2015-01-19 16:15:00	8.619	34.212	278.724	95.4775	1.6958	2.27104	0.8001	7.6	2.8	293	75.6968	16.4623	7.72719
2015-01-19 16:30:00	8.6651	34.244	280.535	96.2215	1.769	2.35742	0.8442	7.4	3.04	285	49.3679	11.0868	5.03947
2015-01-19 16:45:00	8.6241	34.226	278.638	95.4677	1.7568	2.34302	0.8505	7.3	2.64	289	32.9121	7.72719	3.69562
2015-01-19 17:00:00	8.6241	34.226	279.21	95.6754	1.8666	2.47259	0.8568	7.3	3.6	290	26.3304	6.21535	3.02368
2015-01-19 17:15:00	8.6292	34.25	278.182	95.3486	1.8056	2.40061	0.8568	7.3	3.33	287	19.7472	4.53553	2.01579
2015-01-19 17:30:00	8.6292	34.231	278.567	95.4584	1.8056	2.40061	0.8253	7.2	2.14	306	6.58241	1.67982	1.00789
2015-01-19 17:45:00	8.6702	34.307	279.593	96.0001	1.7568	2.34302	0.7938	7.3	2.01	359	0	0.503947	0.335965
2015-01-19 18:00:00	8.6139	34.082	277.953	95.1966	1.7568	2.34302	0.8757	7.2	1.88	30	0	0.167983	0.335965
2015-01-19 18:15:00	8.5731	34.227	279.164	95.5392	2.0618	2.70292	0.7623	7.2	1.06	97	0	0.167983	0.335965
2015-01-19 18:30:00	8.5476	34.223	280.872	96.0871	1.9398	2.55896	0.819	7.1	1.27	66	0	0	0.335965
2015-01-19 18:45:00	8.5578	34.194	279.839	95.7059	1.8422	2.4438	0.8064	7	0.68	64	0	0.167983	0.335965
2015-01-19 19:00:00	8.5782	34.213	279.504	95.656	1.9276	2.54457	0.8694	6.9	0.87	28	0	0	0.335965
2015-01-19 19:15:00	8.5782	34.232	279.694	95.7326	2.1228	2.7749	0.8379	6.8	1.59	11	0	0.167983	0.335965
2015-01-19 19:30:00	8.5782	34.222	280.073	95.8562	2.0496	2.68853	0.8064	6.7	0.39	72	0	0.167983	0.335965
2015-01-19 19:45:00	8.568	34.223	280.11	95.8597	1.9764	2.60215	0.756	6.6	0.44	26	0	0	0.335969
2015-01-19 20:00:00	8.5731	34.227	280.348	95.9646	1.9398	2.55896	0.8064	6.8	1.86	37	0	0	0.335975
2015-01-19 20:15:00	8.6241	34.245	278.657	95.5106	1.9764	2.60215	0.8316	6.6	2.45	12	0	0	0.335975
2015-01-19 20:30:00	8.6088	34.251	278.317	95.3975	2.0984	2.74611	0.8505	6.6	0.95	1	0	0	0.335992
2015-01-19 20:45:00	8.5884	34.232	278.161	95.2717	1.9398	2.55896	0.882	6.5	0.6	42	0	0.167993	0.335986
2015-01-19 21:00:00	8.6088	34.231	278.055	95.2869	1.9398	2.55896	0.7875	6.5	1.06	342	0	0	0.335991
2015-01-19 21:15:00	8.5986	34.232	278.661	95.4542	2.0862	2.73172	0.7686	6.4	1.77	356	0	0	0.335997
2015-01-19 21:30:00	8.5833	34.218	277.765	95.1088	2.074	2.71732	0.8001	6.4	0.77	325	0	0.167998	0.167998
2015-01-19 21:45:00	8.5425	34.199	275.679	94.336	2.0862	2.73172	0.7938	6.5	0.52	347	0	0	0.336027
2015-01-19 22:00:00	8.4967	34.186	275.77	94.4096	1.769	2.35742	0.7938	6.4	0.75	250	0	0	0.168009
2015-01-19 22:15:00	8.619	34.241	278.567	95.472	2.013	2.64534	0.8442	6.3	1.13	296	0	0	0.168005
2015-01-19 22:30:00	8.5425	34.219	277.959	95.0142	1.8422	2.4438	0.7497	6.3	0.86	265	0	0	0.168012
2015-01-19 22:45:00	8.5069	34.214	277.992	95.0248	1.647	2.21346	0.7623	6.3	0.74	288	0	0	0.168018
2015-01-19 23:00:00	8.4815	34.2	278.313	95.0866	1.586	2.14148	0.7623	6.3	1.05	292	0	0	0.336014
2015-01-19 23:15:00	8.4815	34.2	278.601	95.1431	1.8056	2.40061	0.7434	6.2	0.99	263	0	0	0.336037
2015-01-19 23:30:00	8.4561	34.196	278.634	95.0936	1.6958	2.27104	0.7686	6.3	1.02	290	0	0.16802	0.16802
2015-01-19 23:45:00	8.3802	34.163	279.239	95.1391	1.8788	2.48698	0.819	6.3	1.13	301	0	0	0.168032
2015-01-20	8.3247	34.149	279.329	95.0579	1.83	2.4294	0.7938	6.4	0.82	304	0	0	0.168024
2015-01-20 00:15:00	8.3853	34.168	279.257	95.1581	1.9642	2.58776	0.8757	6.3	0.83	263	0	0	0.168018
2015-01-20 00:30:00	8.4257	34.177	278.419	94.9682	1.7324	2.31423	0.7686	6.3	0.26	198	0	0	0.168026
2015-01-20 00:45:00	8.4257	34.168	278.335	94.9534	1.586	2.14148	0.8064	6.2	0.32	247	0	0.168029	0.168029
2015-01-20 01:00:00	8.4561	34.167	277.908	94.861	1.6592	2.22786	0.8064	6.3	1.39	276	0	0	0.168029
2015-01-20 01:15:00	8.4308	34.192	277.821	94.8357	1.6226	2.18467	0.8316	6.3	1.36	277	0	0	0.336054
2015-01-20 01:30:00	8.3651	34.129	276.799	94.3278	1.7202	2.29984	0.7938	6.2	1.28	281	0	0	0.336046
2015-01-20 01:45:00	8.3802	34.105	278.96	95.0489	1.6714	2.24225	0.7938	6.3	1.01	291	0	0	0.168026
2015-01-20 02:00:00	8.3449	34.188	278.756	95.0006	1.708	2.28544	0.8001	6.4	1.17	270	0	0	0.336043
2015-01-20 02:15:00	8.3298	34.144	279.637	95.2026	1.6958	2.27104	0.7182	6.4	1.32	288	0	0	0.16803
2015-01-20 02:30:00	8.1843	34.062	280.068	94.9916	1.6104	2.17027	0.6741	6.1	1.03	250	0	0	0.168029
2015-01-20 02:45:00	8.2243	34.082	279.699	94.8993	1.6958	2.27104	0.6678	6.1	1.21	270	0	0	0.336066
2015-01-20 03:00:00	8.2594	34.096	279.028	94.6983	1.6104	2.17027	0.6489	6.1	1.54	252	0	0	0.336056
2015-01-20 03:15:00	8.2343	34.101	278.407	94.4804	1.708	2.28544	0.6804	6	2.09	258	0	0	0.33606
2015-01-20 03:30:00	8.1993	34.087	278.489	94.4289	1.5372	2.0839	0.693	6.1	1.94	259	0	0	0.168037
2015-01-20 03:45:00	8.1743	34.062	278.573	94.4026	1.6714	2.24225	0.6741	6.1	1.62	264	0	0	0.168031
2015-01-20 04:00:00	8.1793	34.067	278.581	94.4497	1.6592	2.22786	0.6552	5.9	2.28	255	0	0.168034	0.168034
2015-01-20 04:15:00	8.2043	34.101	278.206	94.3738	1.7568	2.34302	0.6741	5.8	2.29	265	0	0	0.336064
2015-01-20 04:30:00	8.2093	34.077	277.499	94.0989	1.8056	2.40061	0.6741	5.7	2.11	268	0	0	0.336058
2015-01-20 04:45:00	8.2043	34.101	276.744	93.8677	1.8422	2.4438	0.6678	5.7	2.06	277	0	0	0.336058
2015-01-20 05:00:00	8.2193	34.096	276.228	93.7099	1.8666	2.47259	0.6489	5.9	2.16	316	0	0	0.336051
2015-01-20 05:15:00	8.2293	34.125	277.46	94.2164	1.6592	2.22786	0.7119	5.6	1.72	308	0	0	0.336046
2015-01-20 05:30:00	8.3046	34.169	277.992	94.5358	1.8422	2.4438	0.7497	5.6	0.91	318	0	0.168023	0.336047
2015-01-20 05:45:00	8.3903	34.183	278.191	94.9281	1.647	2.21346	0.8379	5.4	1.95	350	0	0	0.336046
2015-01-20 06:00:00	8.2845	34.15	278.529	94.5949	1.5982	2.15588	0.7308	5.2	1.79	330	0	0	0.168026
2015-01-20 06:15:00	8.1993	34.116	278.597	94.4851	1.5372	2.0839	0.6993	5.3	1.4	338	0	0	0.336046
2015-01-20 06:30:00	8.1943	34.091	278.516	94.4526	1.5738	2.12708	0.6867	5.3	1.56	344	0	0	0.33605
2015-01-20 06:45:00	8.2644	34.208	278.098	94.5958	1.5616	2.11269	0.819	5.2	1.28	341	0	0	0.336041
2015-01-20 07:00:00	8.1943	34.091	277.841	94.4979	1.6592	2.22786	0.7686	5.3	1.13	328	0	0.168027	0.336053
2015-01-20 07:15:00	8.5119	34.171	273.472	93.5917	1.5128	2.0551	0.8505	5.5	1.57	342	0	0	0.336047
2015-01-20 07:30:00	8.4561	34.244	272.298	93.3236	1.4884	2.02631	0.8883	5.1	0.93	241	0	0	0.336055
2015-01-20 07:45:00	8.6088	34.405	270.495	92.9515	1.1956	1.68081	0.9009	5.2	0.9	252	0	0	0.33605
2015-01-20 08:00:00	8.6344	34.303	269.05	92.4138	1.3176	1.82477	0.8631	5.4	1.12	294	0	0.168034	0.336069
2015-01-20 08:15:00	8.6754	34.533	268.166	92.4348	1.1346	1.60883	0.882	5.9	1.69	347	6.5845	2.52034	1.00814
2015-01-20 08:30:00	8.701	34.508	268.577	92.4232	1.1956	1.68081	0.945	6.1	2.35	321	19.7535	6.21723	2.68853
2015-01-20 08:45:00	8.3752	34.314	270.905	92.8384	1.1224	1.59443	0.882	6.1	3.12	330	36.2147	11.7625	4.70502
2015-01-20 09:00:00	8.2343	34.14	271.308	92.2851	1.2444	1.73839	0.819	6.2	2.8	329	55.9682	17.9797	7.56158
2015-01-20 09:15:00	8.1943	34.179	273.256	92.7816	1.4396	1.96873	0.693	6.1	2	322	154.736	26.2132	11.4262
2015-01-20 09:30:00	8.2394	34.184	274.219	93.011	1.5128	2.0551	0.7497	6.5	1.56	346	177.781	34.2784	16.131
2015-01-20 09:45:00	8.1643	34.218	275.269	93.549	1.159	1.63762	0.8568	6.4	1.9	301	286.426	44.0239	21.1718
2015-01-20 10:00:00	8.1344	34.111	276.662	93.8458	1.4274	1.95433	0.8127	6.4	1.38	4	372.012	53.939	27.0535
2015-01-20 10:15:00	8.1344	34.101	277.405	93.9648	1.0736	1.53685	0.6741	6.3	1.14	333	358.805	61.4855	32.9266
2015-01-20 10:30:00	8.1344	34.101	278.731	94.4252	1.0736	1.53685	0.6804	6.6	0.84	325	411.411	70.3851	38.9721
2015-01-20 10:45:00	8.1643	34.111	277.342	94.0015	1.3298	1.83916	0.6615	6.5	1.14	319	266.585	68.033	40.3158
2015-01-20 11:00:00	8.1843	34.121	278.118	94.3385	1.1224	1.59443	0.6552	6.8	1.56	295	477.219	85.6613	50.7249
2015-01-20 11:15:00	8.2243	34.111	278.679	94.5831	1.0736	1.53685	0.6741	7.1	0.73	289	529.878	94.3843	57.1008
2015-01-20 11:30:00	8.2544	34.13	279.332	94.9081	0.854	1.27772	0.6552	7.3	0.48	269	569.372	100.085	62.1332
2015-01-20 11:45:00	8.2845	34.111	278.472	94.6244	0.7076	1.10497	0.6237	8.6	0.6	313	602.248	106.122	67.3336
2015-01-20 12:00:00	8.2996	34.115	279.718	95.164	0.7076	1.10497	0.6678	7.7	0.56	334	641.616	112.494	71.526
2015-01-20 12:15:00	8.355	34.139	279.668	95.2	0.7198	1.11936	0.6111	8	1.99	8	674.473	116.186	74.5469
2015-01-20 12:30:00	8.3348	34.139	279.846	95.3373	0.976	1.42168	0.6867	8.2	1.51	24	671.177	117.183	75.8833
2015-01-20 12:45:00	8.36	34.115	278.433	94.8604	0.8784	1.30651	0.7056	8.3	1.96	14	713.924	122.21	76.717
2015-01-20 13:00:00	8.4662	34.138	279.58	95.3026	0.7442	1.14816	0.6489	8.6	1.49	347	756.643	123.049	79.2346
2015-01-20 13:15:00	8.446	34.09	279.918	95.4351	0.6466	1.03299	0.6552	8.7	1.7	6	835.604	127.749	80.5775
2015-01-20 13:30:00	8.4561	34.099	279.638	95.4578	0.9638	1.40728	0.6363	8.6	1.96	25	230.28	75.3714	52.0381
2015-01-20 13:45:00	8.5221	34.093	279.397	95.3908	0.7564	1.16255	0.6804	8.7	3.32	34	812.546	116.166	71.8481
2015-01-20 14:00:00	8.619	34.087	280.466	95.9261	0.6466	1.03299	0.7056	9	2.36	32	717.178	110.123	68.4908
2015-01-20 14:15:00	8.568	34.097	280.684	96.0189	0.6466	1.03299	0.693	9	2.93	61	759.955	106.763	50.6957
2015-01-20 14:30:00	8.5731	34.102	279.184	95.4483	0.9882	1.43608	0.6678	9.1	3.65	25	213.833	71.8467	47.0025
2015-01-20 14:45:00	8.5374	34.088	279.863	95.6185	0.8174	1.23453	0.6363	9.2	3	57	674.378	96.0213	55.5648
2015-01-20 15:00:00	8.5425	34.093	279.29	95.5178	0.9394	1.37849	0.63	9.4	3.91	14	644.799	87.628	49.3537
2015-01-20 15:15:00	8.6139	34.101	280.521	96.0573	1.0736	1.53685	0.6552	9.4	6.31	39	595.442	79.2342	42.9745
2015-01-20 15:30:00	8.6497	34.124	280.939	96.2958	1.22	1.7096	0.6552	9.2	4.57	43	279.626	60.4307	33.2369
2015-01-20 15:45:00	8.6497	34.153	282.893	96.9835	1.4518	1.98312	0.6741	9.4	4.21	57	529.657	61.4401	30.72
2015-01-20 16:00:00	8.804	34.244	288.076	99.3817	1.2322	1.724	0.945	9.1	4.57	76	490.167	52.0383	24.1727
2015-01-20 16:15:00	8.9232	34.244	289.966	100.085	1.281	1.78158	0.756	8.8	3.75	87	279.629	39.7849	18.6334
2015-01-20 16:30:00	8.9388	34.277	291.451	100.685	1.2444	1.73839	0.756	8.4	4.63	85	101.982	28.7057	13.0938
2015-01-20 16:45:00	8.9596	34.324	291.008	100.588	1.1712	1.65202	0.7308	8.2	4.08	68	75.6705	21.4873	9.4007
2015-01-20 17:00:00	8.9648	34.328	290.25	100.376	1.1346	1.60883	0.7623	8	3.29	62	62.5115	15.2761	6.04331
2015-01-20 17:15:00	9.0065	34.336	288.397	99.8063	1.1712	1.65202	0.8001	7.8	2.91	34	36.1909	8.39475	3.69369
2015-01-20 17:30:00	8.9024	34.274	290.255	100.099	1.1956	1.68081	0.693	7.8	2.72	37	19.741	3.86165	1.67898
2015-01-20 17:45:00	8.8609	34.285	289.799	99.871	1.2932	1.79598	0.693	7.6	3.99	44	6.58164	1.17528	0.671592
2015-01-20 18:00:00	8.8454	34.281	289.269	99.614	1.5006	2.04071	0.6552	7.3	2.27	46	0	0	0.335842
2015-01-20 18:15:00	8.7319	34.237	282.01	96.8748	1.525	2.0695	0.7623	7.4	3.38	16	0	0.167926	0.335851
2015-01-20 18:30:00	8.7421	34.247	281.747	96.7721	1.5616	2.11269	0.7686	7.1	2.09	2	0	0.16795	0.335899
2015-01-20 18:45:00	8.7524	34.275	283.974	97.6286	1.5372	2.0839	0.756	6.7	3.04	339	0	0	0.335928
2015-01-20 19:00:00	8.7524	34.256	284.274	97.7197	1.3786	1.89675	0.7497	6.5	2.34	352	0	0	0.33596
2015-01-20 19:15:00	8.737	34.232	283.963	97.556	1.4396	1.96873	0.7623	6.4	1.87	12	0	0	0.335965
2015-01-20 19:30:00	8.7164	34.252	286.704	98.4469	1.3054	1.81037	0.6993	6.1	0.88	51	0	0	0.335965
2015-01-20 19:45:00	8.6805	34.229	287.635	98.7107	1.3786	1.89675	0.7182	6.2	2.95	23	0	0	0.335965
2015-01-20 20:00:00	8.6907	34.229	288.872	99.1419	1.3054	1.81037	0.7182	6	2.62	5	0	0	0.335965
2015-01-20 20:15:00	8.66	34.249	290.235	99.5742	1.3176	1.82477	0.6867	6.1	3.51	23	0	0	0.335965
2015-01-20 20:30:00	8.6805	34.229	290.064	99.5367	1.3542	1.86796	0.6552	6.2	3.34	22	0	0	0.335965
2015-01-20 20:45:00	8.701	34.229	288.88	99.2159	1.3664	1.88235	0.7119	6.2	4.41	11	0	0	0.335992
2015-01-20 21:00:00	8.7216	34.266	286.35	98.3409	1.3786	1.89675	0.693	6.2	4.88	8	0	0.168008	0.336016
2015-01-20 21:15:00	8.6959	34.253	287.227	98.6075	1.3908	1.91114	0.6867	6.1	3.44	353	0	0	0.336033
2015-01-20 21:30:00	8.6548	34.235	288.78	98.9719	1.3786	1.89675	0.6678	6	3.51	3	0	0	0.168015
2015-01-20 21:45:00	8.6292	34.221	288.322	98.8625	1.281	1.78158	0.6804	5.7	2.18	340	0	0.168021	0.336041
2015-01-20 22:00:00	8.6395	34.211	285.27	97.8532	1.3664	1.88235	0.7623	5.7	1.21	358	0	0	0.336047
2015-01-20 22:15:00	8.7216	34.295	280.915	96.4843	1.3176	1.82477	0.756	5.8	0.81	44	0	0	0.336051
2015-01-20 22:30:00	8.6907	34.287	279.841	96.0486	1.342	1.85356	0.7497	5.6	1.13	55	0	0.168032	0.336063
2015-01-20 22:45:00	8.6805	34.297	279.939	96.1094	1.1712	1.65202	0.7308	5.5	0.43	60	0	0	0.33607
2015-01-20 23:00:00	8.6907	34.287	279.725	96.0296	1.1468	1.62322	0.7497	5.5	0.56	108	0	0	0.336058
2015-01-20 23:15:00	8.6241	34.313	280.108	96.0225	1.3176	1.82477	0.7686	5.5	0.24	230	0	0	0.168031
2015-01-20 23:30:00	8.6241	34.303	279.202	95.7674	1.22	1.7096	0.7497	5.6	1.63	280	0	0	0.336061
2015-01-20 23:45:00	8.5935	34.294	279.696	95.8492	1.3176	1.82477	0.8631	5.7	1.16	301	0	0	0.336066
2015-01-21	8.619	34.299	278.914	95.6048	1.3786	1.89675	0.8505	5.8	2.08	270	0	0	0.336064
2015-01-21 00:15:00	8.568	34.261	279.392	95.7449	1.3786	1.89675	0.756	6	2.04	261	0	0	0.336055
2015-01-21 00:30:00	8.5629	34.266	280.775	96.1396	1.3176	1.82477	0.7623	5.7	2.13	283	0	0	0.336064
2015-01-21 00:45:00	8.5425	34.238	280.501	95.977	1.22	1.7096	0.7371	5.9	2.07	276	0	0	0.336059
2015-01-21 01:00:00	8.5069	34.234	280.427	95.8356	1.0248	1.47926	0.6867	6.2	3.23	290	0	0	0.336071
2015-01-21 01:15:00	8.5629	34.247	282.6	96.6902	1.098	1.56564	0.693	6.5	3.63	323	0	0	0.336062
2015-01-21 01:30:00	8.4004	34.231	281.889	96.1474	1.2322	1.724	0.6741	6.1	4.31	322	0	0	0.336055
2015-01-21 01:45:00	8.3348	34.178	282.216	96.0397	1.3298	1.83916	0.7056	5.9	4.12	311	0	0	0.336069
2015-01-21 02:00:00	8.3399	34.154	282.187	96.0152	1.2932	1.79598	0.6741	5.7	3.62	321	0	0	0.336053
2015-01-21 02:15:00	8.3298	34.144	282.423	96.1307	1.2932	1.79598	0.6867	5.7	2.29	334	0	0	0.336068
2015-01-21 02:30:00	8.3348	34.159	282.046	95.991	1.3054	1.81037	0.6615	5.6	2.58	319	0	0	0.336066
2015-01-21 02:45:00	8.3348	34.139	282.139	96.0101	1.403	1.92554	0.6741	5.7	2.33	329	0	0	0.336065
2015-01-21 03:00:00	8.3399	34.154	281.775	95.8955	1.3176	1.82477	0.6993	5.7	2.78	319	0	0	0.336075
2015-01-21 03:15:00	8.3399	34.154	281.566	95.8245	1.3298	1.83916	0.6741	5.7	3.09	320	0	0	0.336073
2015-01-21 03:30:00	8.3348	34.169	281.093	95.6522	1.3054	1.81037	0.6741	5.8	2.66	315	0	0.168035	0.33607
2015-01-21 03:45:00	8.3247	34.14	280.933	95.5591	1.3298	1.83916	0.6804	5.7	3.36	321	0	0	0.336073
2015-01-21 04:00:00	8.3147	34.14	280.679	95.4524	1.2688	1.76718	0.6741	5.7	3.49	303	0	0	0.336065
2015-01-21 04:15:00	8.3046	34.14	280.551	95.4088	1.3298	1.83916	0.6804	5.7	4.03	309	0	0	0.336074
2015-01-21 04:30:00	8.3046	34.149	280.177	95.2666	1.22	1.7096	0.6615	5.8	4.13	316	0	0	0.33607
2015-01-21 04:45:00	8.2946	34.14	279.828	95.1218	1.281	1.78158	0.6615	5.8	2.84	314	0	0	0.336052
2015-01-21 05:00:00	8.2946	34.14	279.569	95.0235	1.3054	1.81037	0.6867	5.8	4.56	309	0	0	0.336069
2015-01-21 05:15:00	8.2845	34.159	279.508	95.0043	1.281	1.78158	0.6489	5.7	5.09	311	0	0	0.336062
2015-01-21 05:30:00	8.2745	34.15	279.07	94.8297	1.3908	1.91114	0.6804	5.7	3.71	300	0	0	0.336047
2015-01-21 05:45:00	8.2795	34.174	277.949	94.4837	1.3664	1.88235	0.6993	5.8	4.48	304	0	0	0.336061
2015-01-21 06:00:00	8.2745	34.169	278.385	94.5678	1.2932	1.79598	0.693	5.6	5.03	301	0	0	0.336062
2015-01-21 06:15:00	8.2544	34.15	277.914	94.3962	1.2444	1.73839	0.6678	5.8	3.31	310	0	0	0.33607
2015-01-21 06:30:00	8.2494	34.155	277.861	94.3607	1.1468	1.62322	0.6363	5.9	3.69	316	0	0	0.336062
2015-01-21 06:45:00	8.2343	34.159	277.52	94.2271	1.1468	1.62322	0.6426	5.8	2.84	303	0	0	0.336066
2015-01-21 07:00:00	8.2293	34.155	277.543	94.2326	1.159	1.63762	0.6552	5.7	3.15	295	0	0	0.336071
2015-01-21 07:15:00	8.2193	34.145	277.191	94.0664	1.1224	1.59443	0.6426	5.7	4	307	0	0	0.33607
2015-01-21 07:30:00	8.2143	34.14	276.735	93.9085	1.1224	1.59443	0.6489	5.6	3.95	306	0	0	0.336067
2015-01-21 07:45:00	8.2043	34.14	276.645	93.8377	1.1224	1.59443	0.63	5.5	4.18	308	0	0	0.33606
2015-01-21 08:00:00	8.1843	34.14	275.636	93.4651	1.0248	1.47926	0.7245	5.4	2.21	321	0	0.5041	0.336066
2015-01-21 08:15:00	8.1743	34.15	275.119	93.2857	0.9638	1.40728	0.6489	5.4	3.72	302	13.169	2.01634	1.00817
2015-01-21 08:30:00	8.1693	34.125	274.847	93.1283	0.9516	1.39289	0.6489	5.3	3.15	297	32.9225	5.04077	2.35236
2015-01-21 08:45:00	8.1943				0.8418	1.26332	0.6867	5	3.01	305	49.3837	10.4174	4.03253
2015-01-21 09:00:00	8.2143				0.976	1.42168	0.7056	5	3.32	303	108.644	18.1469	7.39318
2015-01-21 09:15:00	8.1444				0.9638	1.40728	0.6426	5	2.94	283	148.151	26.3808	11.4261
2015-01-21 09:30:00	8.1394				0.9272	1.3641	0.7434	5.2	2.52	263	194.243	33.7745	15.459
2015-01-21 09:45:00	8.1444				1.0126	1.46487	0.9072	5.2	2.35	305	187.658	38.9822	19.155
2015-01-21 10:00:00	8.1843				0.9272	1.3641	0.8064	5.3	3.45	288	174.489	41.5029	21.8436
2015-01-21 10:15:00	8.0598				1.0126	1.46487	0.7056	5.2	2.88	289	256.795	48.0551	25.3717
2015-01-21 10:30:00	8.1843				1.1224	1.59443	0.7938	5.3	3.43	290	352.271	56.1209	30.2448
2015-01-21 10:45:00	8.0152				1.0492	1.50806	0.6237	5.3	2.07	301	424.7	63.3462	34.9496
2015-01-21 11:00:00	8.0053				0.976	1.42168	0.6426	5.5	1.72	278	372.024	60.9945	35.2861
2015-01-21 11:15:00	8.0747				1.037	1.49366	0.7434	5.6	1.9	270	437.869	67.7183	39.3203
2015-01-21 11:30:00	8.0648				1.0004	1.45047	1.4994	5.7	2.24	277	418.115	66.8753	39.9908
2015-01-21 11:45:00	8.0946				0.9394	1.37849	0.6426	5.9	3.06	273	345.643	55.443	33.4338
2015-01-21 12:00:00	8.355				0.976	1.42168	0.6489	6.1	2.78	282	332.464	52.7479	31.9175
2015-01-21 12:15:00	8.1045				1.0126	1.46487	0.6489	6.1	2.23	273	365.38	55.2664	33.5966
2015-01-21 12:30:00	8.1095				0.8784	1.30651	0.5859	6.3	2.18	284	385.12	55.9382	33.9325
2015-01-21 12:45:00	8.1244				1.037	1.49366	0.6741	6.6	2.17	324	497.024	74.0803	45.3553
2015-01-21 13:00:00	8.1294				1.0004	1.45047	0.6237	6.6	2.48	331	411.433	67.193	42.3316
2015-01-21 13:15:00	8.1444				1.0492	1.50806	0.7686	6.7	1.45	307	339.007	57.618	36.2842
2015-01-21 13:30:00	8.1444				0.9882	1.43608	0.6489	6.8	1.06	264	319.245	53.2505	32.7566
2015-01-21 13:45:00	8.1643				1.0858	1.55124	0.6489	6.9	0.61	315	417.978	62.9935	38.3
2015-01-21 14:00:00	8.2143				1.159	1.63762	0.6552	7.4	0.58	275	595.701	80.6316	47.707
2015-01-21 14:15:00	8.2343				1.1834	1.66641	0.6678	7.5	0.46	251	457.472	70.8886	43.0035
2015-01-21 14:30:00	8.2343				1.159	1.63762	0.6993	7.2	1	272	233.673	38.9706	23.1808
2015-01-21 14:45:00	8.2243				1.1346	1.60883	0.6363	7.3	0.36	290	365.319	55.4257	31.9118
2015-01-21 15:00:00	8.2243				0.976	1.42168	0.6363	7.3	0.51	341	312.661	46.5234	25.865
2015-01-21 15:15:00	8.2795	33.989	280.9	95.549	1.1468	1.62322	0.6993	7.4	0.39	11	345.572	49.8788	27.2066
2015-01-21 15:30:00	8.2745	34.159	280.839	95.4894	1.1834	1.66641	0.7434	7.4	1.81	316	325.825	45.173	23.3422
2015-01-21 15:45:00	8.2594	34.174	281.36	95.691	1.3298	1.83916	0.6993	7.5	0.64	271	338.99	45.8438	23.0059
2015-01-21 16:00:00	8.2444	34.159	281.405	95.6318	1.159	1.63762	0.6615	7.4	0.86	357	260.002	36.7758	17.8002
2015-01-21 16:15:00	8.2444	34.14	281.608	95.6568	1.0858	1.55124	0.6363	7.6	0.69	315	220.503	26.8682	12.4265
2015-01-21 16:30:00	8.2594	34.155	283.069	96.1839	1.2932	1.79598	0.6489	7.4	0.98	2	148.102	18.6398	8.3963
2015-01-21 16:45:00	8.2694	34.145	283.413	96.316	1.281	1.78158	0.6615	7.4	0.53	47	82.2788	12.4265	5.03778
2015-01-21 17:00:00	8.2845	34.159	283.63	96.4393	1.2444	1.73839	0.6489	7.4	0.32	19	55.9487	9.06801	4.03023
2015-01-21 17:15:00	8.2845	34.159	283.686	96.4583	1.3786	1.89675	0.6489	7.4	0.43	240	42.7849	5.70949	2.51889
2015-01-21 17:30:00	8.2946	34.169	283.704	96.4921	1.2932	1.79598	0.6489	7.4	1.4	82	13.1646	2.68683	1.00756
2015-01-21 17:45:00	8.3046	34.159	282.869	96.2227	1.3664	1.88235	0.63	7.4	1.44	104	6.58231	0.671767	0.503825
2015-01-21 18:00:00	8.3096	34.164	281.152	95.6416	1.5982	2.15588	0.6426	7	2.26	72	0	0	0.335905
2015-01-21 18:15:00	8.2694	34.164	280.876	95.4962	1.525	2.0695	0.6363	6.6	3.2	83	0	0	0.167954
2015-01-21 18:30:00	8.2644	34.12	283.65	96.3395	1.4396	1.96873	0.6552	6.4	3.55	70	0	0.167966	0.335931
2015-01-21 18:45:00	8.2644	34.12	281.952	95.773	1.9032	2.51578	0.6489	6.2	3.48	61	0	0	0.167981
2015-01-21 19:00:00	8.2845	34.159	283.807	96.469	1.3298	1.83916	0.6615	6.1	3	80	0	0	0.335965
2015-01-21 19:15:00	8.3247	34.198	284.085	96.8165	1.4762	2.01192	0.7119	6	2.1	80	0	0.335965	0.335965
2015-01-21 19:30:00	8.36	34.173	283.462	96.5058	1.4396	1.96873	0.7308	5.9	1.95	95	0	0	0.335965
2015-01-21 19:45:00	8.2946	34.179	283.996	96.6532	1.525	2.0695	0.6804	6	1.72	77	0	0	0.335965
2015-01-21 20:00:00	8.3954	34.216	282.085	96.4856	1.8422	2.4438	0.8442	5.8	2.21	79	0	0	0.335965
2015-01-21 20:15:00	8.6088	34.405	281.296	96.5968	2.0374	2.67413	0.8568	5.8	1.85	79	0	0	0.335965
2015-01-21 20:30:00	8.5527	34.315	280.962	96.5622	1.8056	2.40061	0.9324	5.8	2.24	81	0	0	0.335969
2015-01-21 20:45:00	8.701	34.373	280.225	96.4893	1.9276	2.54457	0.8883	5.5	1.59	48	0	0	0.335986
2015-01-21 21:00:00	8.7164	34.56	279.808	96.36	2.0496	2.68853	0.9702	5.5	2.15	59	0	0	0.335998
2015-01-21 21:15:00	8.7576	34.453	277.566	95.6289	1.8178	2.415	0.9513	5.4	1.13	51	0	0	0.336025
2015-01-21 21:30:00	8.7421	34.458	278.373	95.9748	1.83	2.4294	0.9513	5.4	1.1	101	0	0	0.33604
2015-01-21 21:45:00	8.5425	34.363	278.793	95.9619	1.6714	2.24225	0.882	5.5	0.11	33	0	0	0.336062
2015-01-21 22:00:00	8.4206	34.269	282.521	96.647	1.6592	2.22786	0.7308	5.5	1.45	80	0	0	0.336065
2015-01-21 22:15:00	8.3298	34.222	282.814	96.4693	1.5128	2.0551	0.7749	5.5	0.98	82	0	0	0.168036
2015-01-21 22:30:00	8.2394	34.135	283.649	96.4605	1.586	2.14148	0.7686	5.5	1.25	124	0	0	0.336064
2015-01-21 22:45:00	8.1843	34.16	282.137	95.7246	1.3908	1.91114	0.7371	5.3	1.12	129	0	0	0.168033
2015-01-21 23:00:00	8.1993	34.184	281.554	95.6034	1.6592	2.22786	0.756	5.3	2.23	85	0	0	0.16803
2015-01-21 23:15:00	8.2193	34.242	281.462	95.6701	1.6348	2.19906	0.7308	5.3	2.46	77	0	0	0.168032
2015-01-21 23:30:00	8.2394	34.193	281.587	95.6615	1.3908	1.91114	0.7119	5.3	1.97	67	0	0	0.336058
2015-01-21 23:45:00	8.1893	34.174	282.225	95.8044	1.403	1.92554	0.7245	5.2	1.58	48	0	0	0.168032
2015-01-22	8.2644	34.208	282.717	95.9615	1.3542	1.86796	0.7938	5.1	2.01	57	0	0.168025	0.336051
2015-01-22 00:15:00	8.1793	34.194	282.314	95.7644	1.4396	1.96873	0.7056	5.2	1.17	82	0	0	0.336061
2015-01-22 00:30:00	8.1843	34.189	281.155	95.4506	1.6104	2.17027	0.7371	5.2	1.12	19	0	0	0.336061
2015-01-22 00:45:00	8.1943	34.189	280.985	95.3519	1.5616	2.11269	0.7434	5.3	0.49	41	0	0	0.336062
2015-01-22 01:00:00	8.1743	34.16	281.175	95.3676	1.5006	2.04071	0.7119	5.2	1.48	359	0	0	0.336052
2015-01-22 01:15:00	8.1793	34.184	280.99	95.3297	1.5494	2.09829	0.7119	5.1	0.51	3	0	0	0.336054
2015-01-22 01:30:00	8.1793	34.164	281.082	95.3488	1.586	2.14148	0.7308	5.2	0.74	330	0	0	0.336043
2015-01-22 01:45:00	8.1643	34.169	281.122	95.3346	1.525	2.0695	0.7497	5.4	0.16	334	0	0	0.336055
2015-01-22 02:00:00	8.1693	34.174	281.396	95.4408	1.5616	2.11269	0.7308	5.3	0.64	1	0	0	0.336045
2015-01-22 02:15:00	8.1743	34.179	281.272	95.3917	1.5128	2.0551	0.7245	5.3	0.24	135	0	0	0.336059
2015-01-22 02:30:00	8.1593	34.184	281.72	95.4744	1.5128	2.0551	0.693	5.3	0.98	121	0	0.168024	0.336048
2015-01-22 02:45:00	8.1344	34.169	281.17	95.2788	1.5616	2.11269	0.693	5.2	2.51	95	0	0	0.336062
2015-01-22 03:00:00	8.1494	34.174	281.129	95.268	1.4762	2.01192	0.7056	5	1.04	138	0	0	0.168031
2015-01-22 03:15:00	8.1444	34.189	281.21	95.3254	1.5128	2.0551	0.7182	5	1.63	86	0	0	0.168036
2015-01-22 03:30:00	8.1095	34.184	280.978	95.0999	1.464	1.99752	0.7056	5	1.59	70	0	0	0.336064
2015-01-22 03:45:00	8.0201	34.095	281.374	95.0456	1.4274	1.95433	0.6867	5.1	2.08	64	0	0	0.336068
2015-01-22 04:00:00	8.0251	34.12	281.409	95.0727	1.4152	1.93994	0.6741	5.2	2.53	71	0	0.168029	0.336059
2015-01-22 04:15:00	8.0053	34.09	280.943	94.8662	1.4518	1.98312	0.6489	4.9	1.1	5	0	0.168034	0.336067
2015-01-22 04:30:00	8.0003	34.075	280.906	94.8445	1.4518	1.98312	0.6615	5	1.25	74	0	0	0.33606
2015-01-22 04:45:00	8.0053	34.08	280.825	94.8202	1.4274	1.95433	0.6741	4.7	1.48	4	0	0	0.336068
2015-01-22 05:00:00	8.0152	34.08	280.375	94.6989	1.464	1.99752	0.6867	4.7	1.57	26	0	0	0.336063
2015-01-22 05:15:00	8.0251	34.1	280.113	94.6533	1.6104	2.17027	0.6993	4.7	0.61	5	0	0	0.336062
2015-01-22 05:30:00	8.03	34.095	280.194	94.6777	1.7812	2.37182	0.9513	4.8	1.87	5	0	0	0.336065
2015-01-22 05:45:00	7.9855	34.09	279.92	94.5003	1.586	2.14148	0.6552	4.9	2.42	358	0	0	0.336064
2015-01-22 06:00:00	7.9707	34.075	280.777	94.7294	1.7812	2.37182	0.693	4.9	2.75	23	0	0	0.33606
2015-01-22 06:15:00	7.9756	34.099	281.111	94.8565	1.6104	2.17027	0.6237	5	2.18	14	0	0	0.336069
2015-01-22 06:30:00	7.9707	34.085	280.489	94.6484	1.5006	2.04071	0.6363	5.1	2.22	3	0	0	0.336067
2015-01-22 06:45:00	7.9756	34.09	280.534	94.6563	1.5128	2.0551	0.6489	5	2.94	1	0	0	0.33607
2015-01-22 07:00:00	7.9756	34.09	280.474	94.6567	1.5738	2.12708	0.6426	5	2.66	4	0	0	0.33607
2015-01-22 07:15:00	7.9855	34.09	280.322	94.6053	1.464	1.99752	0.6363	5.1	2	14	0	0	0.168034
2015-01-22 07:30:00	7.9954	34.109	280.41	94.6569	1.4884	2.02631	0.6678	5.1	2.36	10	0	0	0.168036
2015-01-22 07:45:00	7.9806	34.104	280.559	94.6836	1.4152	1.93994	0.63	5.1	2.78	4	0	0	0.168034
2015-01-22 08:00:00	7.9756	34.099	280.028	94.4913	1.3176	1.82477	0.6426	5.3	2.13	24	3.29224	0.336067	0.336067
2015-01-22 08:15:00	7.946	34.109	279.94	94.4064	1.3054	1.81037	0.6489	5.4	1.96	59	16.4612	3.02458	1.17622
2015-01-22 08:30:00	7.946	34.109	279.876	94.3848	1.1956	1.68081	0.6615	5.2	2.62	67	46.0913	6.88929	3.02457
2015-01-22 08:45:00	7.9361	34.109	279.711	94.3087	1.2322	1.724	0.6741	5.1	1.57	75	88.8904	12.6027	4.87305
2015-01-22 09:00:00	7.9115	34.123	279.603	94.2707	1.3542	1.86796	0.6867	5.2	1.66	47	148.151	20.1645	8.23385
2015-01-22 09:15:00	7.9411	34.143	278.006	93.8256	1.2932	1.79598	0.6804	5.4	2.08	45	293.009	29.5746	12.4348
2015-01-22 09:30:00	7.9559	34.138	278.684	94.031	1.403	1.92554	0.6552	5.8	2.62	37	398.361	38.8153	17.4753
2015-01-22 09:45:00	8.0053	34.198	277.763	94.0913	1.2688	1.76718	0.7056	6.1	4.82	54	457.621	48.5606	22.684
2015-01-22 10:00:00	8.1145	34.276	277.49	94.3074	1.0858	1.55124	0.7812	6.1	4.33	34	529.982	57.6231	28.0556
2015-01-22 10:15:00	7.9954	34.198	279.586	94.6557	1.159	1.63762	0.7371	6.1	1.56	5	608.908	67.8657	34.2688
2015-01-22 10:30:00	8.0251	34.071	278.802	94.577	1.098	1.56564	0.7434	6.7	4.88	49	701.021	78.4479	40.9878
2015-01-22 10:45:00	8.1045	34.218	277.963	94.4996	0.9882	1.43608	0.8379	7.1	4.28	38	747.092	85.6612	46.3578
2015-01-22 11:00:00	8.0449	34.169	281.218	95.123	0.8174	1.23453	0.6741	6.7	2.43	13	826.08	95.2239	52.5663
2015-01-22 11:15:00	8.1593	34.125	279.465	95.3195	0.8052	1.22014	0.8253	6.8	3.79	44	865.564	102.604	58.1031
2015-01-22 11:30:00	8.0251	34.11	282.422	95.4817	0.7442	1.14816	0.6237	7.1	3.65	15	905.057	108.984	63.3082
2015-01-22 11:45:00	8.0846	34.13	282.571	95.6894	0.732	1.13376	0.63	7.3	4.45	35	964.307	116.703	68.6785
2015-01-22 12:00:00	8.0996	34.154	282.93	95.8352	0.7442	1.14816	0.6552	7.6	3.11	33	990.544	120.385	72.1976
2015-01-22 12:15:00	8.1244	34.14	283.41	96.014	0.8296	1.24893	0.6426	7.7	2.92	25	1010.21	123.573	74.8828
2015-01-22 12:30:00	8.1444	34.14	283.33	95.987	1.0248	1.47926	0.6615	7.9	2.52	7	1023.24	125.592	76.8998
2015-01-22 12:45:00	8.1394	34.145	283.038	95.9143	1.0858	1.55124	0.6363	8.2	0.95	49	1029.8	126.092	77.9049
2015-01-22 13:00:00	8.1544	34.12	282.914	95.8853	0.8296	1.24893	0.6363	8.4	1.28	21	1029.79	126.763	78.0726
2015-01-22 13:15:00	8.1993	34.125	283.06	96.02	0.7198	1.11936	0.63	8.6	1.61	0	1023.21	125.407	77.393
2015-01-22 13:30:00	8.2444	34.13	285.983	97.1777	0.6588	1.04738	0.6552	8.9	1.01	342	1006.68	122.88	75.5408
2015-01-22 13:45:00	8.2795	34.125	285.362	97.0127	0.6832	1.07618	0.6426	9	1.82	277	990.211	119.859	73.1911
2015-01-22 14:00:00	8.2644	34.13	286.709	97.4443	0.7564	1.16255	0.6237	9.3	1.44	300	1003.18	116.825	69.8267
2015-01-22 14:15:00	8.2694	34.125	286.127	97.2863	0.732	1.13376	0.6174	9.5	1.54	338	937.39	108.767	49.6837
2015-01-22 14:30:00	8.3096	34.125	286.835	97.608	0.732	1.13376	0.6174	9.7	3.2	284	878.162	102.552	59.4164
2015-01-22 14:45:00	8.3701	34.125	286.554	97.5788	0.976	1.42168	0.6363	9.6	2.58	291	845.401	94.9983	53.3736
2015-01-22 15:00:00	8.3752	34.129	287.401	97.9247	0.854	1.27772	0.6363	9.7	3.85	285	792.668	86.7688	47.4963
2015-01-22 15:15:00	8.4206	34.124	286.881	97.7799	0.9882	1.43608	0.6489	9.8	3.89	277	740.029	77.2002	41.1175
2015-01-22 15:30:00	8.4004	34.134	287.143	97.8735	1.1468	1.62322	0.6363	9.9	3	266	661.091	67.1286	34.7391
2015-01-22 15:45:00	8.446	34.119	286.997	97.8981	1.1346	1.60883	0.6426	10.2	3.08	275	582.155	58.2337	29.033
2015-01-22 16:00:00	8.4662	34.128	287.2	97.9833	1.1712	1.65202	0.6237	10.5	2.83	275	529.531	48.334	23.16
2015-01-22 16:15:00	8.4206	34.163	288.879	98.5257	1.3298	1.83916	0.6426	10.1	1.37	290	325.612	30.8792	14.097
2015-01-22 16:30:00	8.4561	34.167	291.707	99.5781	1.2444	1.73839	0.6615	10.1	0.52	243	134.849	14.9365	6.71301
2015-01-22 16:45:00	8.4055	34.168	291.604	99.3835	1.342	1.85356	0.6426	10	1.88	156	200.63	10.7409	4.19567
2015-01-22 17:00:00	8.4055	34.158	291.253	99.2895	1.342	1.85356	0.6615	9.9	1.8	146	148.006	10.7417	4.19599
2015-01-22 17:15:00	8.4713	34.191	291.249	99.4908	1.3298	1.83916	0.7056	9.6	0.41	84	75.6492	8.56048	3.69276
2015-01-22 17:30:00	8.4916	34.21	288.702	98.7353	1.2932	1.79598	0.6993	9.1	0.72	311	32.8954	4.53242	1.84654
2015-01-22 17:45:00	8.5884	34.242	286.016	97.992	1.3786	1.89675	0.7434	9.2	4.74	334	6.57957	1.6787	0.671478
2015-01-22 18:00:00	8.5069	34.214	287.774	98.2862	1.3786	1.89675	0.6867	9	2.8	313	0	0	0.335735
2015-01-22 18:15:00	8.4257	34.158	289.095	98.5861	1.3786	1.89675	0.6741	8.8	2.99	289	0	0	0.335739
2015-01-22 18:30:00	8.4055	34.158	289.848	98.7313	1.6226	2.18467	0.6678	8.5	3.96	290	0	0	0.335782
2015-01-22 18:45:00	8.3903	34.153	289.199	98.5412	1.6714	2.24225	0.693	8.6	7.81	329	0	0	0.167897
2015-01-22 19:00:00	8.4055	34.168	291.394	99.3065	1.5006	2.04071	0.7497	8.4	7.5	323	0	0	0.335802
2015-01-22 19:15:00	8.4308	34.192	290.741	99.1752	1.3664	1.88235	0.6678	8.2	5.39	319	0	0	0.335844
2015-01-22 19:30:00	8.4358	34.206	290.519	99.0956	1.3786	1.89675	0.7056	8.1	7.88	312	0	0.167934	0.335867
2015-01-22 19:45:00	8.4764	34.234	289.668	98.9421	1.4152	1.93994	0.6615	7.9	2.83	306	0	0.167952	0.335904
2015-01-22 20:00:00	8.4865	34.234	289.494	98.8938	1.5372	2.0839	0.6615	7.5	3.89	278	0	0.167967	0.335935
2015-01-22 20:15:00	8.4105	34.211	290.877	99.2128	1.525	2.0695	0.6678	7.3	3.45	262	0	0	0.33596
2015-01-22 20:30:00	8.4257	34.226	290.291	99.0011	1.464	1.99752	0.693	7.1	3.79	273	0	0	0.167982
2015-01-22 20:45:00	8.4206	34.23	290.043	98.9191	1.4518	1.98312	0.693	7.2	5.82	279	0	0	0.335965
2015-01-22 21:00:00	8.4308	34.24	289.643	98.8755	1.4274	1.95433	0.7497	7.5	5.19	283	0	0	0.335965
2015-01-22 21:15:00	8.4662	34.244	288.281	98.4179	1.4884	2.02631	0.7056	7.4	4.28	289	0	0.167983	0.335965
2015-01-22 21:30:00	8.446	34.254	288.827	98.5516	1.3542	1.86796	0.7434	7.6	4.26	273	0	0	0.335965
2015-01-22 21:45:00	8.446	34.274	288.986	98.6752	1.5494	2.09829	0.756	7.7	4.92	287	0	0	0.335965
2015-01-22 22:00:00	8.446	34.264	288.555	98.4483	1.5372	2.0839	0.6804	7.7	6.55	283	0	0	0.167983
2015-01-22 22:15:00	8.3348	34.275	287.142	97.7734	1.5006	2.04071	0.6867	7.8	5.97	287	0	0.335965	0.335965
2015-01-22 22:30:00	8.3096	34.28	286.384	97.4659	1.403	1.92554	0.6993	7.8	10.55	286	0	0	0.335965
2015-01-22 22:45:00	8.3046	34.285	285.413	97.1386	1.342	1.85356	0.6993	7.9	7.92	304	0	0	0.335965
2015-01-22 23:00:00	8.3046	34.285	285.605	97.2041	1.342	1.85356	0.7119	7.9	7.35	286	0	0	0.167983
2015-01-22 23:15:00	8.2946	34.285	285.088	97.007	1.281	1.78158	0.6867	7.9	4.87	285	0	0	0.335965
2015-01-22 23:30:00	8.2996	34.29	284.33	96.7732	1.3054	1.81037	0.6867	7.9	5.33	283	0	0.167983	0.335965
2015-01-22 23:45:00	8.3046	34.285	287.282	97.785	1.3908	1.91114	0.7245	8	8.13	300	0	0.335965	0.335965
2015-01-23	8.2996	34.319	287.361	97.8214	1.2322	1.724	0.7056	8	5.62	307	0	0	0.167983
2015-01-23 00:15:00	8.2946	34.305	287.647	97.8898	1.22	1.7096	0.756	7.7	0.78	0	0	0	0.335965
2015-01-23 00:30:00	8.2895	34.3	286.866	97.5999	1.1956	1.68081	0.7434	7.7	2.61	325	0	0	0.167983
2015-01-23 00:45:00	8.2544	34.315	287.136	97.6379	1.2444	1.73839	0.7497	7.9	7.11	317	0	0	0.335965
2015-01-23 01:00:00	8.2043	34.344	289.621	98.3645	1.2932	1.79598	0.7308	7.9	5.75	312	0	0	0.335965
2015-01-23 01:15:00	8.1643	34.325	289.14	98.1364	1.22	1.7096	0.7623	7.8	5.7	319	0	0.335965	0.335965
2015-01-23 01:30:00	8.1544	34.345	290.516	98.5305	1.159	1.63762	0.7308	7.8	6.24	322	0	0	0.335965
2015-01-23 01:45:00	8.1244	34.325	289.57	98.1656	1.281	1.78158	0.693	7.7	9.83	307	0	0	0.335965
2015-01-23 02:00:00	8.1444	34.354	290.764	98.62	1.2322	1.724	0.6867	7.6	7.03	303	0	0.167983	0.335965
2015-01-23 02:15:00	8.0797	34.35	294.12	99.6269	1.159	1.63762	0.8694	7.7	9.07	305	0	0	0.167983
2015-01-23 02:30:00	8.0648	34.394	292.69	99.1282	1.159	1.63762	1.1466	7.6	9	306	0	0	0.335966
2015-01-23 02:45:00	8.0648	34.384	295.489	100.113	1.281	1.78158	1.0773	7.5	8.77	295	0	0	0.335965
2015-01-23 03:00:00	8.035	34.345	296.284	100.358	1.22	1.7096	0.9702	7.4	7.54	299	0	0	0.167983
2015-01-23 03:15:00	8.0152	34.374	295.851	100.089	1.1712	1.65202	1.008	7.4	11.62	302	0	0.167983	0.167983
2015-01-23 03:30:00	8.0499	34.389	291	98.5418	1.1956	1.68081	0.8631	7.4	9.74	281	0	0.167983	0.335965
2015-01-23 03:45:00	8.0648	34.335	291.417	98.6592	1.2078	1.6952	0.8064	7.3	7.38	296	0	0	0.335965
2015-01-23 04:00:00	8.0548	34.315	279.883	94.7427	1.1956	1.68081	0.7686	7.2	8.06	299	0	0	0.335965
2015-01-23 04:15:00	8.0251	34.305	279.062	94.3979	1.22	1.7096	0.7749	7.1	6.83	298	0	0	0.167983
2015-01-23 04:30:00	8.0003	34.291	282.131	95.3244	1.159	1.63762	0.7497	7.1	10.85	298	0	0.167983	0.335965
2015-01-23 04:45:00	7.9559	34.295	278.42	94.0223	1.1468	1.62322	0.756	6.9	9.7	302	0	0.335965	0.335965
2015-01-23 05:00:00	7.8329	34.328	285.623	96.2358	1.098	1.56564	0.9261	6.8	10.51	293	0	0	0.335965
2015-01-23 05:15:00	7.877	34.225	278.646	93.894	1.1346	1.60883	0.8694	6.6	9.95	290	0	0	0.335973
2015-01-23 05:30:00	7.877	34.186	276.078	92.9255	1.0736	1.53685	0.8631	6.4	8.46	295	0	0	0.167983
2015-01-23 05:45:00	7.8427	34.23	274.933	92.566	1.1102	1.58004	0.7938	6.5	9.09	289	0	0	0.335978
2015-01-23 06:00:00	7.8231	34.2	274.444	92.3238	1.0492	1.50806	0.7308	6.5	6.54	293	0	0	0.335994
2015-01-23 06:15:00	7.7888	34.164	273.576	91.9606	1.0614	1.52245	0.7308	6.6	9.04	295	0	0.168	0.336
2015-01-23 06:30:00	7.7741	34.179	273.796	91.9691	1.037	1.49366	0.6678	6.2	7.24	295	0	0	0.336025
2015-01-23 06:45:00	7.7107	34.221	274.828	92.2435	1.0248	1.47926	0.6867	6	9.68	292	0	0	0.168013
2015-01-23 07:00:00	7.6814	34.23	279.564	93.6468	0.9638	1.40728	0.8883	5.8	9.18	294	0	0	0.336043
2015-01-23 07:15:00	7.6669	34.225	272.445	91.3897	0.976	1.42168	0.7056	5.5	9.99	298	0	0	0.336052
2015-01-23 07:30:00	7.6329	34.219	275.027	92.0833	0.976	1.42168	0.8757	5.4	11.19	307	0	0	0.336063
2015-01-23 07:45:00	7.6232	34.239	272.529	91.3088	0.9882	1.43608	0.8253	5.2	9.02	302	0	0	0.336061
2015-01-23 08:00:00	7.5892	34.223	271.647	90.9452	0.9394	1.37849	0.7686	5.2	11.37	306	6.58451	0.840157	0.504094
2015-01-23 08:15:00	7.5554	34.266	271.801	90.9434	0.8784	1.30651	0.9072	5.1	8.94	299	19.7535	3.1926	1.51228
2015-01-23 08:30:00	7.5457	34.176	271.386	90.6924	0.9272	1.3641	1.0899	5.2	9.06	290	49.3839	7.56139	3.19259
2015-01-23 08:45:00	7.5071	34.165	271.632	90.7089	0.8418	1.26332	1.1088	5.3	10.38	294	82.3064	13.946	5.37678
2015-01-23 09:00:00	7.4927	34.189	271.353	90.6102	0.9638	1.40728	1.1844	5.4	10.53	306	115.229	21.0031	8.23321
2015-01-23 09:15:00	7.4302	34.211	271.675	90.6324	0.915	1.3497	1.386	5.8	10.4	311	246.919	29.0681	12.2657
2015-01-23 09:30:00	7.4206	34.25	272.092	90.7847	0.9516	1.39289	1.1655	6.2	9.01	297	348.979	38.3087	16.634
2015-01-23 09:45:00	7.3918	34.249	273.164	91.0625	0.9028	1.3353	1.764	6.4	10.87	308	424.701	47.0485	21.3398
2015-01-23 10:00:00	7.3631	34.258	275.135	91.6355	0.8174	1.23453	1.7829	6.4	12.64	306	510.3	56.6259	26.5486
2015-01-23 10:15:00	7.3583	34.272	275.401	91.7116	0.854	1.27772	2.583	6.6	10.48	312	589.29	65.6985	32.0931
2015-01-23 10:30:00	7.3344	34.256	275.099	91.6583	0.8296	1.24893	2.0349	6.7	12.42	299	668.265	75.4313	37.9676
2015-01-23 10:45:00	7.3488	34.252	275.635	91.769	0.7686	1.17695	2.079	6.6	10.59	308	714.307	83.3203	43.172
2015-01-23 11:00:00	7.3344	34.226	275.378	91.7045	0.854	1.27772	2.268	6.9	7.89	318	783.429	91.0466	48.883
2015-01-23 11:15:00	7.344	34.267	276.572	92.1059	0.8296	1.24893	2.5389	6.7	11.15	320	826.221	97.9343	53.5867
2015-01-23 11:30:00	7.3631	34.228	278.684	92.7535	0.8174	1.23453	2.6019	6.8	12.85	310	878.872	104.653	58.4579
2015-01-23 11:45:00	7.3535	34.247	280.28	93.3251	0.8174	1.23453	3.15	6.8	13.58	306	911.708	110.029	62.3215
2015-01-23 12:00:00	7.3822	34.199	281.417	93.7093	0.8906	1.32091	4.4541	6.7	10.18	315	944.59	115.068	65.8492
2015-01-23 12:15:00	7.4014	34.21	282.583	94.0808	1.0492	1.50806	9.4311	6.7	14.19	309	977.481	119.436	68.8728
2015-01-23 12:30:00	7.3822	34.229	284.925	94.8714	1.0858	1.55124	9.6579	6.7	13.02	318	984.075	120.779	70.3847
2015-01-23 12:45:00	7.4686	34.213	285.428	95.3075	1.1346	1.60883	9.9414	6.7	11.17	307	984.063	121.787	70.8886
2015-01-23 13:00:00	7.459	34.232	285.459	95.2361	1.22	1.7096	11.6676	6.5	11.28	319	990.644	122.459	71.2246
2015-01-23 13:15:00	7.5312	34.23	288.115	96.2355	1.1102	1.58004	9.5949	6.8	13.84	302	977.479	120.612	70.0487
2015-01-23 13:30:00	7.4686	34.272	288.367	96.4299	1.1956	1.68081	13.1544	6.7	10.62	324	957.732	117.924	67.8649
2015-01-23 13:45:00	7.6329	34.219	290.273	97.297	1.403	1.92554	11.8692	6.7	10.98	316	937.985	114.564	65.3452
2015-01-23 14:00:00	7.6912	34.231	290.418	97.2479	1.22	1.7096	11.9007	6.6	12.84	320	306.079	92.2224	61.8176
2015-01-23 14:15:00	7.7839	34.268	292.106	98.0273	1.1712	1.65202	9.0531	6.8	9.67	306	868.87	104.485	47.875
2015-01-23 14:30:00	7.6135	34.238	293.123	98.243	1.1224	1.59443	9.6012	6.6	12.58	313	806.338	97.5979	53.0825
2015-01-23 14:45:00	7.6863	34.216	294.659	98.7652	1.0858	1.55124	9.1161	6.4	12.74	309	760.261	90.5426	48.547
2015-01-23 15:00:00	7.6571	34.195	294.842	98.77	1.1956	1.68081	9.8406	6.5	13.22	312	701.02	82.9834	43.1715
2015-01-23 15:15:00	7.6863	34.206	294.463	98.768	1.0858	1.55124	8.9208	6.5	16.53	305	622.032	74.0803	37.7961
2015-01-23 15:30:00	7.7107	34.192	296.292	99.3724	1.037	1.49366	7.5348	6.5	12.1	312	549.626	65.3452	32.5886
2015-01-23 15:45:00	7.6669	34.176	294.78	98.8336	1.0248	1.47926	7.5096	6.5	15.17	304	477.22	56.4421	27.3812
2015-01-23 16:00:00	7.6669	34.156	294.207	98.618	1.0736	1.53685	6.6087	6.4	9.56	296	398.232	48.043	22.6776
2015-01-23 16:15:00	7.6329	34.18	296.539	99.3396	1.0004	1.45047	6.2118	6.3	10.51	297	315.953	39.3079	17.8061
2015-01-23 16:30:00	7.6135	34.179	293.394	98.2217	1.0858	1.55124	6.3126	6.2	12.87	293	253.421	30.9088	13.6066
2015-01-23 16:45:00	7.5796	34.163	296.785	99.2604	1.0004	1.45047	5.5314	6.2	12.36	302	187.597	23.3496	9.57501
2015-01-23 17:00:00	7.5699	34.153	295.273	98.6738	1.0492	1.50806	5.7204	6.1	11.75	292	115.194	15.9583	6.38334
2015-01-23 17:15:00	7.5071	34.155	294.839	98.4693	1.0004	1.45047	5.166	5.9	13.04	309	62.5347	10.2469	4.03158
2015-01-23 17:30:00	7.4927	34.159	293.01	97.8831	1.098	1.56564	5.0904	5.7	10.51	322	32.9137	4.70351	2.01579
2015-01-23 17:45:00	7.4542	34.148	293.241	97.7863	1.0492	1.50806	5.9787	5.6	10.29	322	13.1665	1.51184	0.67193
2015-01-23 18:00:00	7.5457	34.147	290.139	96.734	1.4274	1.95433	8.1459	5.6	11.51	301	0	0.167983	0.503948
2015-01-23 18:15:00	7.4879	34.194	287.164	95.7528	1.2566	1.75279	7.497	5.6	13.96	312	0	0	0.335973
2015-01-23 18:30:00	7.3727	34.149	287.161	95.7252	1.1712	1.65202	5.8086	5.5	14.33	309	0	0	0.168003
2015-01-23 18:45:00	7.3583	34.143	287.311	95.7162	1.159	1.63762	4.7943	5.5	9.38	302	0	0	0.336043
2015-01-23 19:00:00	7.4975	34.264	284.164	94.809	1.2322	1.724	5.1345	5.5	7.64	300	0	0	0.336056
2015-01-23 19:15:00	7.301	34.219	288.186	95.7488	1.1956	1.68081	5.733	5.6	9.3	304	0	0	0.336054
2015-01-23 19:30:00	7.4302	34.241	289.233	95.9748	1.0736	1.53685	5.3676	5.5	13.78	297	0	0	0.168027
2015-01-23 19:45:00	7.3583	34.232	279.897	93.2461	1.1956	1.68081	4.9392	5.5	11.88	302	0	0	0.168032
2015-01-23 20:00:00	7.2012	34.179	284.585	94.4149	1.1468	1.62322	5.04	5.4	8.29	300	0	0	0.336065
2015-01-23 20:15:00	7.2249	34.205	283.248	93.9874	1.1224	1.59443	4.1643	5.4	11.32	300	0	0	0.336051
2015-01-23 20:30:00	7.3249	34.285	280.736	93.2837	1.1834	1.66641	4.3092	5.5	10.85	300	0	0	0.168022
2015-01-23 20:45:00	7.2963	34.304	277.841	92.4136	1.2444	1.73839	4.1391	5.4	9.54	306	0	0	0.16803
2015-01-23 21:00:00	7.1302	34.219	281.925	93.384	1.0858	1.55124	3.8745	5.3	7.36	287	0	0	0.168027
2015-01-23 21:15:00	7.1208	34.219	279.847	92.6351	1.22	1.7096	4.8762	5.3	9.85	306	0	0	0.168025
2015-01-23 21:30:00	7.1823	34.248	274.205	91.2007	1.4152	1.93994	4.5549	5.2	9.09	298	0	0	0.168025
2015-01-23 21:45:00	7.135	34.324	276.416	91.5222	1.1834	1.66641	4.2462	5.2	14.5	302	0	0	0.336052
2015-01-23 22:00:00	7.0454	34.253	274.637	90.9404	1.1956	1.68081	3.7674	5.3	9.79	307	0	0	0.168023
2015-01-23 22:15:00	7.0972	34.302	273.142	90.4744	1.3542	1.86796	4.4352	5.2	10.97	318	0	0	0.336053
2015-01-23 22:30:00	7.0031	34.265	275.224	90.7056	1.1468	1.62322	5.9661	5.1	13.24	300	0	0	0.336048
2015-01-23 22:45:00	6.9563	34.272	274.061	90.4646	1.159	1.63762	4.3974	5.1	11.37	297	0	0	0.168027
2015-01-23 23:00:00	6.7608	34.215	271.945	89.8207	1.22	1.7096	4.8258	5.1	10.35	302	0	0	0.16803
2015-01-23 23:15:00	6.9703	34.218	271.663	89.6412	1.2078	1.6952	4.7502	5.1	9.93	302	0	0	0.16803
2015-01-23 23:30:00	6.9236	34.234	272.455	89.765	1.22	1.7096	4.5549	5	11.26	292	0	0	0.336067
2015-01-23 23:45:00	6.8304	34.247	272.096	89.5857	1.1834	1.66641	4.3155	5.1	11.07	317	0	0	0.168034
2015-01-24	6.7979	34.249	271.561	89.362	1.1956	1.68081	4.4415	4.9	11.32	303	0	0	0.336065
2015-01-24 00:15:00	6.8164	34.18	272.368	89.4695	1.1834	1.66641	4.8195	5	11.29	296	0	0	0.336068
2015-01-24 00:30:00	6.7654	34.201	272.009	89.188	1.159	1.63762	4.8258	5	10.23	303	0	0	0.336077
2015-01-24 00:45:00	6.7376	34.188	271.651	89.0727	1.159	1.63762	3.6855	5	10.72	305	0	0.168039	0.168039
2015-01-24 01:00:00	6.5673	34.237	271.256	88.855	1.0858	1.55124	3.528	4.8	12.18	303	0	0.168037	0.168037
2015-01-24 01:15:00	6.7145	34.201	271.57	88.9466	1.0858	1.55124	3.528	4.7	9.04	306	0	0	0.168039
2015-01-24 01:30:00	6.6638	34.171	271.718	88.8021	1.0492	1.50806	3.6792	4.7	10.41	320	0	0	0.336078
2015-01-24 01:45:00	6.5673	34.186	272.122	88.9037	1.0736	1.53685	3.9438	4.7	14.08	313	0	0	0.168039
2015-01-24 02:00:00	6.5536	34.22	271.581	88.8441	1.1346	1.60883	3.6603	4.7	10.66	294	0	0	0.504117
2015-01-24 02:15:00	6.5033	34.139	271.934	88.9516	1.1224	1.59443	4.3596	4.6	11.43	314	0	0	0.168039
2015-01-24 02:30:00	6.5673	34.196	271.972	88.7437	1.1346	1.60883	4.4856	4.6	12.94	318	0	0	0.168039
2015-01-24 02:45:00	6.4394	34.131	272.81	88.9889	1.098	1.56564	3.9753	4.5	9.04	306	0	0	0.336078
2015-01-24 03:00:00	6.4668	34.185	272.56	88.6947	1.1102	1.58004	4.6998	4.6	10.91	309	0	0	0.168039
2015-01-24 03:15:00	6.4759	34.197	271.963	88.5075	1.0858	1.55124	4.9707	4.4	8.18	308	0	0	0.168039
2015-01-24 03:30:00	6.3396	34.16	272.88	88.7647	1.1468	1.62322	4.9833	4.6	12.47	303	0	0	0.336078
2015-01-24 03:45:00	6.394	34.167	272.055	88.6465	1.098	1.56564	4.3722	4.5	10.47	310	0	0	0.168039
2015-01-24 04:00:00	6.326	34.164	272.281	88.4359	1.1346	1.60883	4.1958	4.5	10.43	307	0	0.168039	0.336078
2015-01-24 04:15:00	6.4713	34.201	272.164	88.78	1.159	1.63762	3.8178	4.4	10.73	305	0	0.168039	0.168039
2015-01-24 04:30:00	6.3532	34.177	272.956	88.8775	1.1346	1.60883	4.0698	4.4	8.2	306	0	0	0.168039
2015-01-24 04:45:00	6.2853	34.194	272.43	88.6189	1.0858	1.55124	3.465	4.3	9.99	300	0	0	0.168039
2015-01-24 05:00:00	6.3758	34.236	271.559	88.0685	1.037	1.49366	3.8241	4.2	12.02	313	0	0	0.168039
2015-01-24 05:15:00	6.137	34.159	271.97	87.9629	1.037	1.49366	3.591	4.2	9.62	302	0	0	0.168039
2015-01-24 05:30:00	6.0521	34.163	272.316	87.9509	1.037	1.49366	4.7502	4.1	11.17	303	0	0	0.168039
2015-01-24 05:45:00	6.4076	34.245	272.842	88.6459	1.0492	1.50806	3.3957	4.1	10.95	316	0	0.504117	0.168039
2015-01-24 06:00:00	6.3305	34.139	272.574	88.3509	1.0492	1.50806	3.7674	4.2	12.69	318	0	0	0.168039
2015-01-24 06:15:00	6.0343	34.129	272.376	88.1159	1.0492	1.50806	3.4146	4.4	14.58	312	0	0	0.168039
2015-01-24 06:30:00	6.0076	34.167	273.066	88.1573	1.0492	1.50806	3.3768	4.3	11.91	312	0	0	0.504117
2015-01-24 06:45:00	5.9898	34.174	272.994	87.8558	1.0004	1.45047	3.717	4.3	11.72	309	0	0.168039	0.168039
2015-01-24 07:00:00	6.3034	34.288	272.871	88.1251	1.0614	1.52245	3.465	4.3	9.75	307	0	0.336078	0.168039
2015-01-24 07:15:00	6.1594	34.352	272.683	88.3934	0.976	1.42168	3.3453	4.2	9.09	315	0	0	0.168039
2015-01-24 07:30:00	6.4212	34.343	273.545	88.4041	0.9882	1.43608	3.7044	4.3	10.38	294	0	0	0.168039
2015-01-24 07:45:00	5.7734	34.166	273.311	87.8166	0.9516	1.39289	3.6603	4.3	10.5	298	0	0	0.168039
2015-01-24 08:00:00	5.6989	34.18	273.324	88.1208	0.9882	1.43608	3.6729	4.3	11.17	295	6.58452	1.17627	0.504117
2015-01-24 08:15:00	5.7865	34.225	273.635	87.8185	0.9394	1.37849	3.8556	4.4	7.16	303	26.3381	4.03294	1.51235
2015-01-24 08:30:00	6.0878	34.312	273.333	87.636	0.8784	1.30651	3.4272	4.4	11.03	312	52.6761	7.72979	3.52882
2015-01-24 08:45:00	6.2673	34.294	273.238	88.8227	0.854	1.27772	2.7531	4.5	9.13	300	88.891	14.6194	5.88136
2015-01-24 09:00:00	6.1818	34.36	273.652	88.8884	0.8784	1.30651	2.6397	4.7	9.96	295	134.983	22.6853	9.41018
2015-01-24 09:15:00	6.1414	34.309	273.484	88.5208	0.8906	1.32091	2.4696	4.9	7.83	315	312.765	31.0872	13.6112
2015-01-24 09:30:00	5.7865	34.184	274.3	88.4084	0.8296	1.24893	2.5515	5.5	10.11	310	431.286	40.8335	18.6523
2015-01-24 09:45:00	5.7164	34.245	274.394	88.2301	0.8418	1.26332	4.5108	5.8	9.64	306	562.976	54.4446	26.3821
2015-01-24 10:00:00	5.7558	34.329	275.31	88.3385	0.8418	1.26332	5.1471	5.9	8.05	304	668.329	64.1898	32.0949
2015-01-24 10:15:00	5.8085	34.224	276.439	88.7572	0.793	1.20574	3.9564	6	9.9	294	721.005	71.75	37.4713
2015-01-24 10:30:00	6.1012	34.298	276.413	89.0776	0.7076	1.10497	3.8619	5.9	10.46	308	846.111	88.0495	47.2174
2015-01-24 10:45:00	6.0878	34.291	277.623	89.7307	0.6588	1.04738	2.7657	6.1	10.71	304	859.279	88.5485	48.8949
2015-01-24 11:00:00	6.2492	34.241	278.33	90.0662	0.7808	1.19134	3.3642	6	11.45	298	839.46	82.16	45.8684
2015-01-24 11:15:00	6.3396	34.283	278.818	90.5422	0.9028	1.3353	3.1437	5.7	10.33	299	312.719	45.0226	27.3832
2015-01-24 11:30:00	6.0833	34.234	279.958	90.9996	0.9028	1.3353	3.0555	5.7	8.47	308	279.796	43.0042	27.0456
2015-01-24 11:45:00	6.3124	34.239	280.756	91.2305	0.9394	1.37849	2.5452	5.7	8.82	303	365.381	58.29	37.9641
2015-01-24 12:00:00	6.2492	34.231	281.769	91.3232	0.9028	1.3353	2.6649	5.5	11.14	301	286.379	47.2044	31.0776
2015-01-24 12:15:00	5.9898	34.205	282.949	91.347	0.8784	1.30651	3.024	5.6	9.87	301	398.308	62.9973	41.6622
2015-01-24 12:30:00	5.9987	34.268	284.753	91.9588	0.8906	1.32091	2.8791	5.8	13.3	304	391.731	64.3447	42.8404
2015-01-24 12:45:00	6.1953	34.285	286.716	92.4007	0.8784	1.30651	3.1185	5.7	10.81	307	378.585	67.5391	45.3621
2015-01-24 13:00:00	6.2357	34.224	286.537	93.0444	0.915	1.3497	3.0114	6.1	9.32	321	335.788	69.222	48.3882
2015-01-24 13:15:00	5.9011	34.254	288.077	92.9582	0.854	1.27772	3.7422	6.5	14.97	307	477.36	83.6718	56.7893
2015-01-24 13:30:00	6.1504	34.269	290.151	93.7196	0.8906	1.32091	3.3327	6.5	12.22	296	424.668	79.4735	53.5984
2015-01-24 13:45:00	6.0254	34.221	291.803	94.1056	0.8174	1.23453	3.3327	6.8	14.09	311	773.597	102.818	64.3452
2015-01-24 14:00:00	6.1683	34.189	292.418	94.4604	0.793	1.20574	5.67	7.3	15.54	307	1181.8	123.812	56.9502
2015-01-24 14:15:00	6.2267	34.202	293.536	95.2689	1.1712	1.65202	7.4277	7.2	12.09	318	362.092	61.9873	38.973
2015-01-24 14:30:00	6.3758	34.307	293.391	95.327	1.037	1.49366	7.371	7.2	11.85	300	424.632	77.9443	49.5551
2015-01-24 14:45:00	6.1863	34.212	295.118	95.5003	1.0126	1.46487	5.3361	7.5	12.2	323	207.374	66.0172	43.1715
2015-01-24 15:00:00	6.2222	34.237	296.691	96.0658	0.9882	1.43608	5.2164	7.9	8.31	308	339.04	70.2167	42.6676
2015-01-24 15:15:00	6.3169	34.244	296.336	96.3982	1.0004	1.45047	5.1345	7.9	8.24	301	740.572	81.6395	44.8513
2015-01-24 15:30:00	6.3758	34.195	297.773	96.4598	1.0126	1.46487	4.9833	7.8	9.97	307	625.352	72.4005	38.804
2015-01-24 15:45:00	6.1683	34.22	298.443	96.8263	0.9638	1.40728	4.536	7.8	9.83	320	569.376	63.8334	32.9246
2015-01-24 16:00:00	6.2222	34.248	298.819	97.1666	0.9638	1.40728	4.3659	8	12.44	319	503.55	54.0904	26.7092
2015-01-24 16:15:00	6.1414	34.196	299.057	96.6763	1.0004	1.45047	5.2101	7.8	9.28	308	115.191	33.5965	17.1342
2015-01-24 16:30:00	6.2853	34.307	297.478	97.4605	0.9638	1.40728	3.78	7.7	8.92	309	75.697	20.4939	9.74299
2015-01-24 16:45:00	6.3169	34.265	299.382	96.9857	0.9638	1.40728	4.3281	7.5	6.4	314	95.4441	17.4702	7.7272
2015-01-24 17:00:00	6.485	34.35	299.665	97.3778	0.9272	1.3641	3.4776	7.3	5.93	322	69.1147	13.7746	6.04737
2015-01-24 17:15:00	6.3169	34.367	299.798	97.4964	0.9394	1.37849	3.7044	7	5.59	331	49.3676	8.23114	3.52763
2015-01-24 17:30:00	6.403	34.26	294.051	96.5295	0.915	1.3497	2.457	6.9	7.46	321	26.3294	3.19167	1.34386
2015-01-24 17:45:00	6.7284	34.339	296.325	97.2847	0.9394	1.37849	2.1798	7	7.77	300	6.58239	0.503948	0.503948
2015-01-24 18:00:00	6.6776	34.379	295.053	96.839	1.1102	1.58004	3.0429	7	6.7	325	0	0	0.503948
2015-01-24 18:15:00	6.7747	34.393	289.078	95.0234	1.098	1.56564	3.0429	7	8.54	290	0	0	0.335965
2015-01-24 18:30:00	6.5765	34.37	291.813	95.8078	1.0736	1.53685	2.7153	6.9	6.47	300	0	0	0.503948
2015-01-24 18:45:00	6.5444	34.341	293.722	96.114	1.0614	1.52245	2.9169	6.9	8.89	300	0	0	0.167983
2015-01-24 19:00:00	6.7053	34.392	287.764	94.7661	1.1468	1.62322	3.276	6.7	8.8	297	0	0	0.503948
2015-01-24 19:15:00	6.3079	34.253	296.117	96.3886	1.0004	1.45047	2.8098	6.6	6.99	304	0	0	0.167983
2015-01-24 19:30:00	6.4576	34.347	291.589	95.6014	1.0492	1.50806	2.5893	6.7	10.7	326	0	0	0.167983
2015-01-24 19:45:00	6.4258	34.308	296.344	96.6254	1.0126	1.46487	3.3768	6.7	10.69	316	0	0	0.167983
2015-01-24 20:00:00	6.4713	34.384	296.174	96.6291	1.1468	1.62322	3.4398	6.5	8.88	302	0	0	0.335971
2015-01-24 20:15:00	6.3758	34.318	298.533	97.0681	1.0492	1.50806	3.1815	6.3	7.49	307	0	0	0.335978
2015-01-24 20:30:00	6.0343	34.232	297.324	96.5999	0.9882	1.43608	3.4461	6.2	5.79	306	0	0	0.167999
2015-01-24 20:45:00	6.2944	34.318	293.687	95.454	1.0126	1.46487	3.0996	6	4.73	295	0	0	0.168004
2015-01-24 21:00:00	6.3215	34.301	291.315	94.6306	1.0248	1.47926	3.5343	5.9	8.09	279	0	0	0.336045
2015-01-24 21:15:00	6.5261	34.42	286.724	93.7507	1.2078	1.6952	2.8413	6	6.43	288	0	0	0.336051
2015-01-24 21:30:00	6.6132	34.444	285.731	93.5464	1.1224	1.59443	3.0051	6.4	8.25	322	0	0	0.168031
2015-01-24 21:45:00	6.5765	34.431	284.793	93.2433	1.098	1.56564	2.7405	6.4	7.65	321	0	0	0.336062
2015-01-24 22:00:00	6.5902	34.437	280.17	91.8044	1.3176	1.82477	3.1878	6.8	7.96	315	0	0.16803	0.33606
2015-01-24 22:15:00	6.5627	34.475	283.802	92.8856	1.1468	1.62322	3.0933	6.9	7.32	320	0	0	0.336061
2015-01-24 22:30:00	6.4531	34.443	284.352	92.7909	1.1468	1.62322	2.8035	6.5	9.1	310	0	0.168029	0.336058
2015-01-24 22:45:00	5.941	34.265	292.422	94.2371	0.9272	1.3641	3.1248	6.7	9.86	321	0	0.168032	0.168032
2015-01-24 23:00:00	6.1101	34.32	291.037	94.1465	1.0004	1.45047	2.7657	6.9	10.8	325	0	0	0.168032
2015-01-24 23:15:00	6.4212	34.527	281.136	91.6405	1.1102	1.58004	3.0681	6.9	9.23	326	0	0	0.33606
2015-01-24 23:30:00	6.2853	34.358	287.897	93.3697	0.976	1.42168	2.4822	6.7	8.43	325	0	0	0.168025
2015-01-24 23:45:00	5.8923	34.232	289.719	93.1592	1.0248	1.47926	3.4839	6.7	6.05	321	0	0	0.168025
2015-01-25	6.444	34.483	280.941	91.3283	1.1102	1.58004	2.7405	6.6	5.92	319	0	0	0.16802
2015-01-25 00:15:00	6.1908	34.402	282.626	91.6762	1.0004	1.45047	2.646	6.7	8.77	324	0	0	0.336044
2015-01-25 00:30:00	6.2312	34.413	276.902	90.1226	1.0614	1.52245	2.5326	6.6	9.63	322	0	0	0.168025
2015-01-25 00:45:00	6.2043	34.471	282.369	91.5308	0.976	1.42168	2.394	6.6	8.52	318	0	0.168032	0.336065
2015-01-25 01:00:00	6.3667	34.48	275.483	89.5795	1.098	1.56564	3.0555	6.6	7.37	317	0	0	0
2015-01-25 01:15:00	6.0655	34.386	273.944	88.7805	1.0004	1.45047	2.1672	6.6	7.05	316	0	0.168023	0.168023
2015-01-25 01:30:00	6.2402	34.465	272.574	88.5496	1.0614	1.52245	2.7405	6.6	7.64	317	0	0	0.168024
2015-01-25 01:45:00	6.3124	34.494	272.444	88.7967	1.0858	1.55124	3.1185	6.5	9.54	302	0	0	0.168028
2015-01-25 02:00:00	6.0521	34.389	275.082	89.1628	1.0248	1.47926	2.6082	6.5	8.56	304	0	0	0.33606
2015-01-25 02:15:00	6.3396	34.487	272.012	88.4971	1.159	1.63762	3.5217	6.3	8.74	303	0	0	0.168028
2015-01-25 02:30:00	5.9809	34.431	274.951	88.9484	1.0492	1.50806	2.8602	6.3	7.83	314	0	0.168035	0.168035
2015-01-25 02:45:00	6.0565	34.436	275.813	89.0431	0.9638	1.40728	2.2554	6.2	7.91	316	0	0	0.16803
2015-01-25 03:00:00	6.2628	34.483	272.515	88.3661	1.1224	1.59443	2.7972	6.2	8.15	301	0	0	0.336072
2015-01-25 03:15:00	5.8879	34.381	278.691	89.6523	1.0004	1.45047	2.6586	6.1	9.44	315	0	0.168037	0.336074
2015-01-25 03:30:00	6.1953	34.5	272.287	88.273	1.037	1.49366	2.6334	6	9.47	309	0	0	0.16803
2015-01-25 03:45:00	6.0699	34.463	271.73	88.0323	1.0858	1.55124	2.9799	5.9	8.53	297	0	0.168033	0.336066
2015-01-25 04:00:00	6.1728	34.451	271.389	87.8663	1.0248	1.47926	2.9232	5.9	7.84	308	0	0	0.33606
2015-01-25 04:15:00	6.0788	34.444	272.412	88.1548	1.0248	1.47926	2.4066	5	7.46	290	0	0	0.336061
2015-01-25 04:30:00	5.9809	34.451	274.541	88.5341	1.0004	1.45047	2.3562	4.9	8.5	299	0	0	0.168028
2015-01-25 04:45:00	6.137	34.395	273.005	88.4936	1.0004	1.45047	2.3436	5.2	7.89	280	0	0.16803	0.16803
2015-01-25 05:00:00	6.0699	34.412	272.869	88.1865	0.976	1.42168	2.5452	5.4	9.96	300	0	0	0.336048
2015-01-25 05:15:00	6.0476	34.455	272.22	88.1085	1.0614	1.52245	2.52	5.3	9.92	286	0	0	0.336055
2015-01-25 05:30:00	5.9587	34.433	272.609	88.1827	0.9882	1.43608	2.1672	5.4	12.37	298	0	0	0.336054
2015-01-25 05:45:00	5.7514	34.375	274.383	88.1067	0.915	1.3497	2.1546	4.8	10.33	300	0	0.16803	0.16803
2015-01-25 06:00:00	5.8614	34.428	272.954	87.9993	0.9638	1.40728	2.1294	4.6	8.21	285	0	0.168033	0.336066
2015-01-25 06:15:00	5.9631	34.387	272.972	88.1468	0.9272	1.3641	2.0979	4.8	11.42	292	0	0	0.336065
2015-01-25 06:30:00	5.941	34.42	272.221	87.7682	0.9394	1.37849	2.1231	4.7	10.35	300	0	0	0.168036
2015-01-25 06:45:00	5.7821	34.416	272.654	87.5558	0.9028	1.3353	2.0097	4.7	11.77	297	0	0	0.336077
2015-01-25 07:00:00	5.8173	34.391	273.752	87.6992	0.8784	1.30651	2.5137	4.7	12.44	291	0	0	0.168039
2015-01-25 07:15:00	5.6203	34.447	274.368	87.9	0.8784	1.30651	2.4507	4.8	11.94	301	0	0	0.168039
2015-01-25 07:30:00	5.6989	34.439	272.923	87.5875	0.9394	1.37849	2.7783	4.9	11.01	298	0	0	0.168039
2015-01-25 07:45:00	5.6073	34.304	273.535	87.5792	0.9028	1.3353	2.7279	4.9	8.34	301	0	0.168039	0.336078
2015-01-25 08:00:00	5.616	34.399	274.038	87.7857	0.9028	1.3353	2.961	5	11.15	300	6.58451	0.840195	0.672156
2015-01-25 08:15:00	5.6465	34.378	273.29	87.4176	0.854	1.27772	2.8917	4.8	10.36	311	26.3381	3.69686	1.68039
2015-01-25 08:30:00	5.6203	34.405	273.498	87.4703	0.7808	1.19134	2.5074	4.9	9.21	286	49.3839	8.73803	3.52882
2015-01-25 08:45:00	5.6247	34.411	274.211	87.8969	0.8052	1.22014	2.6334	4.9	10.75	308	82.3064	15.1235	5.88136
2015-01-25 09:00:00	5.629	34.438	274.231	87.6463	0.8052	1.22014	2.394	4.9	11.2	285	102.06	22.6852	9.57819
2015-01-25 09:15:00	5.4469	34.426	275.066	87.7107	0.8052	1.22014	2.6397	5	11.5	290	312.764	32.4315	13.7792
2015-01-25 09:30:00	5.4988	34.415	275.592	87.9895	0.8052	1.22014	2.3751	5.4	13.34	295	408.24	42.009	18.9881
2015-01-25 09:45:00	5.5725	34.433	276.579	88.5116	0.7564	1.16255	2.6208	5.5	10.84	301	497.131	51.9238	24.7016
2015-01-25 10:00:00	5.629	34.407	277.825	88.5793	0.6832	1.07618	2.6775	5.7	10.71	295	576.145	62.1714	30.5816
2015-01-25 10:15:00	5.4685	34.404	278.301	88.7985	0.61	0.9898	2.2302	5.8	10.25	304	655.159	72.2507	36.7974
2015-01-25 10:30:00	5.3995	34.412	279.411	88.87	0.5734	0.946612	2.4255	5.9	14.86	301	727.589	81.9999	43.5204
2015-01-25 10:45:00	5.2837	34.332	280.98	89.3613	0.6222	1.0042	2.6271	6.1	10.93	288	800.019	91.5781	49.9059
2015-01-25 11:00:00	5.5942	34.442	281.674	90.3672	0.5856	0.961008	2.3247	6.2	10.32	301	859.239	100.314	56.2898
2015-01-25 11:15:00	5.6029	34.454	282.779	90.5146	0.5856	0.961008	2.1735	6.5	12.38	305	911.905	107.863	61.9961
2015-01-25 11:30:00	5.7339	34.403	284.436	91.1423	0.5734	0.946612	2.2491	6.5	10.23	306	961.213	115.41	67.7004
2015-01-25 11:45:00	5.6726	34.435	285.72	91.498	0.5734	0.946612	2.5704	6.6	10.69	302	1030.31	123.637	73.5776
2015-01-25 12:00:00	5.8746	34.436	286.795	92.0141	0.5734	0.946612	2.772	6.5	12.63	320	1036.87	126.155	76.4322
2015-01-25 12:15:00	5.6814	34.426	289.392	92.6956	0.6344	1.01859	3.024	6.8	8.39	306	1043.47	128.171	78.7838
2015-01-25 12:30:00	5.6726	34.404	290.04	93.3183	0.6588	1.04738	3.5154	6.9	8.19	303	1063.09	130.69	80.7996
2015-01-25 12:45:00	5.9321	34.367	291.784	94.2465	0.6466	1.03299	2.7594	7.4	7.95	304	1063.05	131.866	81.9755
2015-01-25 13:00:00	5.9454	34.405	292.28	94.3139	0.61	0.9898	3.5532	7.8	8.6	318	1076.21	132.538	82.4794
2015-01-25 13:15:00	6.012	34.378	293.317	94.7149	0.5612	0.932216	2.6271	8	9.83	304	1069.63	131.362	81.6395
2015-01-25 13:30:00	6.0298	34.442	295.117	95.1467	0.5124	0.874632	2.6964	8.3	10.1	320	1056.47	129.851	80.4636
2015-01-25 13:45:00	6.1325	34.39	295.97	95.6949	0.5612	0.932216	2.7279	8.5	10.64	320	1056.47	128.171	78.7838
2015-01-25 14:00:00	6.1235	34.388	297.392	96.3126	0.5124	0.874632	2.4255	8.9	9.43	309	654.944	121.45	74.0793
2015-01-25 14:15:00	6.1056	34.386	299.29	96.7765	0.549	0.91782	2.3121	9.3	7.48	332	970.897	105.312	51.7323
2015-01-25 14:30:00	6.1414	34.381	299.244	97.0257	0.6222	1.0042	2.1609	9.1	7.22	299	918.238	108.835	64.3268
2015-01-25 14:45:00	6.2312	34.341	300.498	97.5138	0.5734	0.946612	2.0538	8.8	8.85	310	862.288	101.443	58.7831
2015-01-25 15:00:00	6.1683	34.384	302.34	97.8585	0.5978	0.975404	2.0538	9	6.92	303	826.085	95.7205	53.9057
2015-01-25 15:15:00	6.2628	34.37	302.541	98.3361	0.6466	1.03299	2.0034	10.3	11.01	359	766.844	86.3143	47.3553
2015-01-25 15:30:00	6.3124	34.33	303.248	98.5942	0.7076	1.10497	1.9341	9.7	6.38	322	691.147	77.246	41.1419
2015-01-25 15:45:00	6.3124	34.33	303.026	98.6306	0.7686	1.17695	1.8396	9.7	7.09	326	618.741	67.3384	34.7607
2015-01-25 16:00:00	6.3305	34.343	304.272	99.0861	0.793	1.20574	1.8144	9.3	8.2	320	549.618	58.1024	28.5475
2015-01-25 16:15:00	6.2402	34.342	307.188	99.7724	0.7442	1.14816	1.5624	9	8.27	321	444.308	46.0113	21.8302
2015-01-25 16:30:00	6.2492	34.353	308.608	100.263	0.7442	1.14816	1.7703	9.1	11.15	320	345.569	35.7682	16.2888
2015-01-25 16:45:00	6.2087	34.364	308.452	100.131	0.7442	1.14816	1.9341	9.1	7.57	301	299.495	26.0285	11.419
2015-01-25 17:00:00	6.2673	34.345	309.497	100.525	0.732	1.13376	1.8396	8.1	10.36	310	95.444	16.7926	6.88497
2015-01-25 17:15:00	6.2583	34.354	308.954	100.3	0.732	1.13376	2.016	7.9	11.27	315	36.2029	10.0756	4.19815
2015-01-25 17:30:00	6.2177	34.324	309.963	100.463	0.7198	1.11936	1.9782	7.9	12.9	321	23.0382	5.54216	2.35122
2015-01-25 17:45:00	6.1953	34.326	310.868	100.825	0.732	1.13376	1.8018	7.8	9.88	321	6.58235	1.84748	1.00772
2015-01-25 18:00:00	6.2312	34.29	310.346	100.676	0.7808	1.19134	1.9152	7.7	10.6	320	0	0	0.503893
2015-01-25 18:15:00	6.1728	34.287	312.084	101.137	0.793	1.20574	2.0727	7.7	8.67	316	0	0	0.167979
2015-01-25 18:30:00	6.1414	34.298	311.806	100.988	0.8174	1.23453	2.0097	7.4	10.39	309	0	0	0.335964
2015-01-25 18:45:00	6.1235	34.296	312.457	101.097	0.8174	1.23453	1.9656	7.5	9.78	312	0	0.167983	0.167983
2015-01-25 19:00:00	6.1325	34.287	312.111	100.923	0.8174	1.23453	2.1483	7.4	8.99	317	0	0	0.335965
2015-01-25 19:15:00	6.1101	34.279	308.464	99.8054	0.8418	1.26332	2.4507	7.3	9.53	323	0	0	0.167983
2015-01-25 19:30:00	6.1773	34.303	305.758	98.8822	0.8296	1.24893	2.5074	7.3	9.54	310	0	0	0.167983
2015-01-25 19:45:00	6.0699	34.278	305.184	98.6714	0.8418	1.26332	2.7531	7.2	10.04	306	0	0	0.335965
2015-01-25 20:00:00	6.0254	34.272	305.931	98.7808	0.8418	1.26332	2.7342	7.1	12.2	308	0	0	0.167983
2015-01-25 20:15:00	5.9765	34.311	302.857	97.7321	0.8296	1.24893	2.898	7	9.36	306	0	0	0.167983
2015-01-25 20:30:00	6.1012	34.339	302.618	97.61	0.8296	1.24893	3.2886	7	10.57	307	0	0	0.335965
2015-01-25 20:45:00	5.9321	34.305	302.623	97.5251	0.8174	1.23453	2.9925	6.9	9.53	307	0	0	0.167983
2015-01-25 21:00:00	5.9277	34.299	289.654	93.6416	1.0004	1.45047	4.6683	6.8	10.87	307	0	0.167983	0.167983
2015-01-25 21:15:00	5.8702	34.316	298.733	96.1509	0.8296	1.24893	3.7107	6.8	11.15	320	0	0.167985	0.33597
2015-01-25 21:30:00	5.9898	34.329	297.585	95.8003	0.854	1.27772	2.9295	6.7	11.19	312	0	0.167983	0.167983
2015-01-25 21:45:00	5.8746	34.312	297.205	95.5718	0.9516	1.39289	3.1248	6.6	10.55	303	0	0	0.167985
2015-01-25 22:00:00	5.7602	34.304	297.461	95.5221	0.8418	1.26332	3.3768	6.6	8.45	310	0	0.16799	0.16799
2015-01-25 22:15:00	5.8614	34.335	291.713	93.821	0.8662	1.29212	4.2525	6.6	7.03	307	0	0	0.335985
2015-01-25 22:30:00	5.7865	34.329	289.787	93.1994	0.9516	1.39289	4.4478	6.5	10.82	301	0	0.167991	0.503975
2015-01-25 22:45:00	5.8526	34.344	285.203	91.825	0.9516	1.39289	4.0005	6.5	11.47	305	0	0.168003	0.168003
2015-01-25 23:00:00	5.8746	34.384	282.34	90.9402	0.9638	1.40728	4.1769	6.3	8.43	305	0	0.168011	0.168011
2015-01-25 23:15:00	5.8173	34.328	282.792	90.9742	0.9516	1.39289	4.725	6.4	11.02	306	0	0.168015	0.33603
2015-01-25 23:30:00	5.8129	34.323	285.647	91.7475	0.915	1.3497	4.2525	6.2	10.95	308	0	0	0.336032
2015-01-25 23:45:00	5.6552	34.317	290.581	93.0394	0.8662	1.29212	3.2004	6.2	9.88	304	0	0	0.33605
2015-01-26	5.712	34.343	290.179	92.7922	0.854	1.27772	3.6603	6.2	10.39	304	0	0	0.168024
2015-01-26 00:15:00	5.7383	34.378	283.898	91.0095	0.8784	1.30651	3.8556	6.2	7.84	304	0	0	0.16803
2015-01-26 00:30:00	5.6508	34.322	282.284	90.44	0.8906	1.32091	3.4965	6.2	8.53	315	0	0	0.168024
2015-01-26 00:45:00	5.677	34.347	282.375	90.3922	0.8784	1.30651	3.6288	6.2	8.7	311	0	0	0.168032
2015-01-26 01:00:00	5.6858	34.349	282.04	90.3682	0.8662	1.29212	3.3516	6.1	9	303	0	0	0.168032
2015-01-26 01:15:00	5.629	34.313	281.63	90.1564	0.8784	1.30651	3.4398	6.3	11.43	311	0	0	0.168032
2015-01-26 01:30:00	5.5204	34.341	283.058	90.4192	0.8906	1.32091	3.1878	6.3	12.37	306	0	0	0.33607
2015-01-26 01:45:00	5.4901	34.34	283.54	90.482	0.854	1.27772	3.0807	6.2	10.33	312	0	0	0.336063
2015-01-26 02:00:00	5.5812	34.31	280.961	89.8209	0.854	1.27772	3.2823	6.3	10.59	317	0	0	0.168035
2015-01-26 02:15:00	5.5681	34.313	280.429	89.5531	0.8662	1.29212	3.2823	6.3	12.44	302	0	0	0.168025
2015-01-26 02:30:00	5.4728	34.327	280.884	89.5871	0.8174	1.23453	3.2256	6.4	11.89	309	0	0	0.16803
2015-01-26 02:45:00	5.5464	34.335	281.074	89.6716	0.8418	1.26332	3.339	6.3	12.32	310	0	0.168033	0.168033
2015-01-26 03:00:00	5.3737	34.334	281.406	89.5974	0.8662	1.29212	3.5973	6.4	13.73	309	0	0	0.336056
2015-01-26 03:15:00	5.434	34.325	280.548	89.3583	0.854	1.27772	3.3579	6.5	12.05	303	0	0	0.168034
2015-01-26 03:30:00	5.4685	34.331	280.868	89.4837	0.8784	1.30651	3.7863	6.5	10.62	322	0	0.168026	0.168026
2015-01-26 03:45:00	5.5421	34.329	278.823	89.1878	0.854	1.27772	3.6414	6.4	13.58	321	0	0	0.336049
2015-01-26 04:00:00	5.5551	34.336	281.175	89.5055	0.8418	1.26332	3.8367	6.4	9.39	319	0	0	0.168026
2015-01-26 04:15:00	5.4858	34.366	281.291	89.4797	0.8296	1.24893	3.9123	6.4	10.56	313	0	0.168022	0.168022
2015-01-26 04:30:00	5.4254	34.323	278.77	89.0662	0.8662	1.29212	3.7674	6.4	9.22	316	0	0.168023	0.168023
2015-01-26 04:45:00	5.5421	34.381	278.181	89.0303	0.8906	1.32091	4.2903	6.5	11.16	323	0	0.33605	0.168025
2015-01-26 05:00:00	5.3866	34.321	278.363	88.8554	0.8784	1.30651	3.6666	6.5	9.26	318	0	0	0.336039
2015-01-26 05:15:00	5.3694	34.36	279.38	88.8954	0.854	1.27772	3.5784	6.6	11.04	321	0	0	0.168027
2015-01-26 05:30:00	5.5594	34.384	279.829	88.953	0.8174	1.23453	3.3201	6.7	11.29	312	0	0.168025	0.168025
2015-01-26 05:45:00	5.3222	34.356	278.99	88.8377	0.8662	1.29212	4.1832	6.6	8.03	310	0	0	0.168021
2015-01-26 06:00:00	5.4254	34.396	279.216	89.1488	0.8418	1.26332	3.4713	6.5	10.41	307	0	0.168018	0.168018
2015-01-26 06:15:00	5.3694	34.401	279.897	89.0304	0.8296	1.24893	3.3894	6.5	7	321	0	0.168009	0.168009
2015-01-26 06:30:00	5.4082	34.404	281.429	89.3595	0.8296	1.24893	3.8682	6.4	9.45	324	0	0	0.336041
2015-01-26 06:45:00	5.5074	34.417	278.263	88.8655	0.8296	1.24893	3.3894	6.4	8.16	311	0	0	0.168013
2015-01-26 07:00:00	5.3737	34.397	279.578	88.7666	0.7686	1.17695	3.0429	6.4	8.03	324	0	0	0.168012
2015-01-26 07:15:00	5.3523	34.377	277.896	88.5171	0.8052	1.22014	3.0807	6.4	10.49	321	0	0	0.336027
2015-01-26 07:30:00	5.4254	34.459	278.73	88.6929	0.7808	1.19134	2.961	6.4	9.98	318	0	0.168015	0.336029
2015-01-26 07:45:00	5.3609	34.358	278.894	88.7865	0.7808	1.19134	3.1689	6.4	10.98	323	0	0.168019	0.336037
2015-01-26 08:00:00	5.1686	34.409	277.709	88.9333	0.8296	1.24893	3.8619	6.7	11.39	311	6.58402	0.504062	0.504062
2015-01-26 08:15:00	5.378	34.424	279.278	88.8378	0.7442	1.14816	3.3264	6.6	7.59	308	13.1677	2.18425	1.17613
2015-01-26 08:30:00	5.6465	34.534	277.545	88.8336	0.7564	1.16255	3.3201	6.5	8.28	316	49.3815	6.55255	2.68823
2015-01-26 08:45:00	5.7076	34.544	276.929	88.9959	0.7808	1.19134	3.3453	6.4	8.65	317	108.632	13.441	5.5444
2015-01-26 09:00:00	5.629	34.5	280.112	89.0954	0.732	1.13376	3.2949	6.5	10.54	313	161.296	20.3293	8.40052
2015-01-26 09:15:00	5.3437	34.438	280.536	89.1542	0.732	1.13376	3.8052	6.7	8.1	313	174.467	23.689	10.4164
2015-01-26 09:30:00	5.378	34.487	278.155	89.3835	0.8418	1.26332	3.528	6.7	9.6	312	194.214	26.8809	12.6004
2015-01-26 09:45:00	5.3995	34.433	279.482	89.0618	0.7198	1.11936	2.8539	6.8	13.02	319	194.217	28.8953	14.2796
2015-01-26 10:00:00	5.4469	34.458	278.535	89.358	0.8052	1.22014	3.2004	6.9	8.6	306	256.755	36.9582	19.3191
2015-01-26 10:15:00	5.434	34.482	280.262	89.349	0.7442	1.14816	3.2823	6.8	6.76	301	233.713	35.277	19.3184
2015-01-26 10:30:00	5.3351	34.542	279.709	89.8443	0.854	1.27772	3.0807	6.8	12.07	308	233.714	36.6205	20.494
2015-01-26 10:45:00	5.5161	34.397	281.193	89.6647	0.7564	1.16255	3.2949	6.7	8.76	304	200.795	33.5965	19.654
2015-01-26 11:00:00	5.4297	34.517	279.793	89.8155	0.793	1.20574	2.7657	6.7	10.13	299	184.33	30.9088	18.4781
2015-01-26 11:15:00	5.7953	34.693	280.345	90.2067	0.8296	1.24893	3.0051	6.7	10.84	298	306.129	46.1952	27.8851
2015-01-26 11:30:00	5.5031	34.473	281.564	90.5274	0.8052	1.22014	2.709	6.8	7.51	300	260.041	42.6683	26.8777
2015-01-26 11:45:00	5.6552	34.64	282.128	90.3475	0.7686	1.17695	2.8287	6.8	9.64	305	237.008	38.972	25.0294
2015-01-26 12:00:00	5.7865	34.65	281.424	90.5486	0.793	1.20574	2.8476	6.8	8.49	294	217.252	37.2921	24.3575
2015-01-26 12:15:00	5.5986	34.646	283.968	91.0918	0.7808	1.19134	2.4318	6.8	9.98	286	299.546	48.8829	32.2527
2015-01-26 12:30:00	5.7953	34.651	283.677	91.2535	0.793	1.20574	2.6271	7	7.14	293	325.877	53.5864	35.9483
2015-01-26 12:45:00	5.4469	34.458	286.185	91.3938	0.7564	1.16255	2.5074	7.1	8.06	296	418.048	69.2088	47.3711
2015-01-26 13:00:00	5.9277	34.753	283.812	91.6518	0.854	1.27772	2.4255	7.3	7.93	302	391.696	64.1693	43.5075
2015-01-26 13:15:00	5.8393	34.679	286.222	92.3002	0.8174	1.23453	2.4003	7.3	8.12	301	358.777	60.9777	41.6597
2015-01-26 13:30:00	5.8526	34.675	288.095	92.8498	0.793	1.20574	2.3247	7.3	7.34	288	444.361	72.9044	49.2189
2015-01-26 13:45:00	6.1863	34.694	287.477	93.4112	0.8296	1.24893	2.2995	7.5	9.08	302	470.692	75.7601	50.5628
2015-01-26 14:00:00	6.1683	34.723	288.174	93.7047	0.8296	1.24893	2.3877	7.3	6.96	289	457.491	74.2483	48.547
2015-01-26 14:15:00	6.0165	34.611	290.241	94.0028	0.793	1.20574	2.1483	7.3	9.67	296	437.74	72.9044	47.5391
2015-01-26 14:30:00	6.0967	34.724	289.625	94.0622	0.8296	1.24893	2.6901	7.6	11.74	310	470.657	74.2483	46.8671
2015-01-26 14:45:00	5.9365	34.765	292.703	94.4887	0.8174	1.23453	2.4129	7.7	6.98	305	371.914	62.9935	39.1399
2015-01-26 15:00:00	5.7821	34.603	293.805	94.1561	0.7198	1.11936	2.3058	7.6	9.86	321	338.992	55.0983	33.2605
2015-01-26 15:15:00	6.1459	34.663	292.601	94.9647	0.8296	1.24893	2.3688	7.5	8.99	308	246.838	41.8277	24.3575
2015-01-26 15:30:00	5.6945	34.568	296.204	95.3233	0.7686	1.17695	2.3499	7.6	8.59	310	213.926	33.5965	18.982
2015-01-26 15:45:00	6.0565	34.683	296.364	96.05	0.793	1.20574	2.0916	7.6	9.29	313	167.85	26.7092	14.2785
2015-01-26 16:00:00	6.061	34.637	297.657	96.4082	0.7808	1.19134	2.1798	7.8	10.93	317	187.601	27.2132	13.9426
2015-01-26 16:15:00	5.8349	34.58	298.68	96.1929	0.7076	1.10497	2.3436	7.8	8.87	314	207.348	23.6855	11.5908
2015-01-26 16:30:00	6.1414	34.617	297.114	96.3156	0.7686	1.17695	1.9971	7.8	7.98	308	121.774	17.1342	7.89518
2015-01-26 16:45:00	6.1191	34.609	298.627	96.8651	0.7442	1.14816	1.8459	7.8	8.25	300	95.4447	13.2706	5.71141
2015-01-26 17:00:00	6.0298	34.628	300.956	97.3741	0.732	1.13376	2.1924	7.6	6.92	283	59.2412	8.90307	4.03158
2015-01-26 17:15:00	5.9454	34.601	301.48	97.301	0.7564	1.16255	2.1672	7.5	8	310	49.3681	6.88728	3.19167
2015-01-26 17:30:00	6.0432	34.594	301.391	97.6978	0.7564	1.16255	2.0412	7.6	9.22	306	19.7471	3.52763	1.34386
2015-01-26 17:45:00	6.061	34.586	301.051	97.5605	0.8296	1.24893	2.0916	7.4	8.36	297	0	0.67193	0.503948
2015-01-26 18:00:00	5.9987	34.588	301.994	97.5653	0.7808	1.19134	1.8648	7.3	6.55	284	0	0	0.335965
2015-01-26 18:15:00	5.9987	34.598	302.616	97.7634	0.8418	1.26332	1.9026	7.1	6.99	293	0	0	0.167983
2015-01-26 18:30:00	6.0521	34.574	302.314	97.8466	0.7564	1.16255	1.8333	7.3	9.9	305	0	0	0.335965
2015-01-26 18:45:00	5.9676	34.568	302.342	97.7556	0.7564	1.16255	1.7577	7.2	9.52	288	0	0	0.167983
2015-01-26 19:00:00	6.0343	34.572	300.674	97.4693	0.8174	1.23453	1.8396	7.2	10.08	294	0	0.167983	0.167983
2015-01-26 19:15:00	6.1773	34.611	298.017	96.7645	0.854	1.27772	1.6821	7.3	8.33	292	0	0	0.167983
2015-01-26 19:30:00	6.1638	34.645	299.469	97.1492	0.8174	1.23453	1.8333	7.3	9.71	288	0	0	0.335965
2015-01-26 19:45:00	6.2312	34.648	295.495	96.1163	0.9028	1.3353	2.0412	7.2	9.15	290	0	0	0.167983
2015-01-26 20:00:00	6.2312	34.658	297.129	96.4435	0.8174	1.23453	1.5435	7.2	8.7	276	0	0	0.335965
2015-01-26 20:15:00	6.1683	34.661	294.755	95.6964	0.8662	1.29212	1.8018	7.1	9.21	296	0	0	0.335965
2015-01-26 20:30:00	6.1683	34.599	292.719	95.2047	0.8662	1.29212	1.7073	7.1	8.69	284	0	0	0.167983
2015-01-26 20:45:00	6.1908	34.669	294.014	95.553	0.8784	1.30651	1.7073	7.1	9.2	298	0	0	0.167983
2015-01-26 21:00:00	6.3215	34.761	290.746	94.735	0.8906	1.32091	1.6506	7.2	9.08	286	0	0	0.167983
2015-01-26 21:15:00	6.2222	34.698	292.665	95.1851	0.915	1.3497	1.8837	7.2	6.45	297	0	0	0.335965
2015-01-26 21:30:00	6.0699	34.628	294.149	95.3399	0.8052	1.22014	1.7766	7.2	8.09	305	0	0	0.335965
2015-01-26 21:45:00	6.2808	34.741	290.031	94.4716	0.8784	1.30651	1.8018	7.2	6.48	313	0	0.167983	0.335965
2015-01-26 22:00:00	6.1549	34.665	293.624	95.1958	0.8052	1.22014	1.6569	7.3	7.18	296	0	0	0.167983
2015-01-26 22:15:00	6.0165	34.631	295.513	95.5223	0.793	1.20574	1.4868	7.5	7.85	316	0	0	0.167983
2015-01-26 22:30:00	6.2222	34.709	291.326	94.5084	0.9028	1.3353	1.6506	7.4	8.5	299	0	0	0.167983
2015-01-26 22:45:00	6.2763	34.735	286.507	93.3498	0.8418	1.26332	1.6821	7.5	8.98	302	0	0	0.167983
2015-01-26 23:00:00	6.1908	34.751	290.846	94.2121	0.7686	1.17695	1.4931	7.5	6.29	298	0	0	0.167983
2015-01-26 23:15:00	5.8923	34.614	293.175	94.5654	0.7686	1.17695	1.7766	7.4	9.03	286	0	0	0.335965
2015-01-26 23:30:00	6.0476	34.692	288.17	93.5244	0.9394	1.37849	1.9908	7.4	6.22	300	0	0	0.167983
2015-01-26 23:45:00	6.1683	34.733	285.05	92.6586	0.8784	1.30651	1.6443	7.6	5.26	294	0	0	0.167983
2015-01-27	6.3034	34.8	283.207	92.3326	0.8662	1.29212	1.6128	7.8	7.58	307	0	0.335965	0.503948
2015-01-27 00:15:00	6.2628	34.78	282.44	92.0701	0.8906	1.32091	1.7262	7.8	10.16	303	0	0	0.335965
2015-01-27 00:30:00	6.2132	34.759	283.909	92.4254	0.8296	1.24893	1.6317	7.8	10.15	310	0	0	0.167983
2015-01-27 00:45:00	6.1504	34.751	283.457	92.1226	0.8052	1.22014	1.6317	7.9	9.73	311	0	0	0.167983
2015-01-27 01:00:00	6.061	34.709	290.197	93.395	0.6832	1.07618	1.6506	7.7	8.37	293	0	0	0.167983
2015-01-27 01:15:00	5.9809	34.637	288.305	93.2331	0.7808	1.19134	1.5561	7.7	7.74	300	0	0	0.335965
2015-01-27 01:30:00	5.8923	34.614	287.07	92.8305	0.7686	1.17695	1.4742	7.6	3.5	301	0	0	0.167983
2015-01-27 01:45:00	6.1863	34.786	280.111	91.1737	0.8174	1.23453	1.6254	7.5	4.64	296	0	0	0.335965
2015-01-27 02:00:00	6.1863	34.766	280.25	91.1688	0.8174	1.23453	1.4931	7.8	7.49	303	0	0.335965	0.335965
2015-01-27 02:15:00	6.1728	34.759	279.107	90.72	0.8418	1.26332	1.5561	7.8	5.8	308	0	0	0.335966
2015-01-27 02:30:00	6.2447	34.809	277.011	90.1671	0.854	1.27772	1.9341	7.8	6.02	283	0	0.167983	0.167983
2015-01-27 02:45:00	6.2132	34.779	276.948	90.0698	0.8418	1.26332	1.9656	7.8	3.27	275	0	0	0.335965
2015-01-27 03:00:00	6.1235	34.758	277.625	90.1884	0.8174	1.23453	1.701	7.9	5.98	296	0	0	0.335965
2015-01-27 03:15:00	6.1101	34.731	278.384	90.3604	0.8052	1.22014	1.5372	8.1	4.84	297	0	0	0.167983
2015-01-27 03:30:00	6.0655	34.705	279.235	90.5204	0.793	1.20574	1.6821	8.3	6.6	301	0	0	0.167983
2015-01-27 03:45:00	6.1012	34.74	278.93	90.4341	0.7808	1.19134	1.8144	8.1	8.97	307	0	0.167983	0.167983
2015-01-27 04:00:00	6.0298	34.7	280.668	90.8443	0.7198	1.11936	1.4679	7.9	6.51	294	0	0	0.335965
2015-01-27 04:15:00	6.0878	34.733	278.289	90.2492	0.8418	1.26332	1.638	7.9	4.53	290	0	0.167983	0.335965
2015-01-27 04:30:00	6.0699	34.731	278.167	90.1475	0.7686	1.17695	1.4364	7.9	4.54	291	0	0	0.167983
2015-01-27 04:45:00	5.9587	34.68	280.064	90.621	0.7198	1.11936	1.4742	8	7.24	299	0	0.167983	0.167983
2015-01-27 05:00:00	6.0521	34.708	277.525	90.0941	0.8174	1.23453	1.89	8.1	9.34	319	0	0	0.335965
2015-01-27 05:15:00	6.1235	34.717	276.84	89.877	0.8052	1.22014	1.6632	8.2	8.26	306	0	0.335965	0.335965
2015-01-27 05:30:00	6.1056	34.705	277.149	89.8377	0.8174	1.23453	1.8837	8.2	5.88	310	0	0	0.167983
2015-01-27 05:45:00	6.0254	34.694	277.183	89.7719	0.7076	1.10497	1.4364	8.1	6.49	297	0	0.167983	0.335965
2015-01-27 06:00:00	5.9365	34.62	280.009	90.4732	0.7076	1.10497	1.449	8.1	7.3	299	0	0	0.167983
2015-01-27 06:15:00	5.9809	34.668	278.412	90.0352	0.6832	1.07618	1.3356	8.2	7.35	303	0	0	0.167983
2015-01-27 06:30:00	6.1638	34.707	276.432	89.7832	0.7686	1.17695	1.7514	8.4	8.52	295	0	0	0.335965
2015-01-27 06:45:00	6.1459	34.725	276.045	89.6186	0.7808	1.19134	1.701	8.2	7.89	286	0	0	0.335965
2015-01-27 07:00:00	5.9942	34.675	276.045	89.6092	0.7686	1.17695	1.6128	8.2	8.63	289	0	0.167983	0.335965
2015-01-27 07:15:00	6.1325	34.677	275.269	89.3579	0.7442	1.14816	1.6821	7.9	6.85	289	0	0.167983	0.167983
2015-01-27 07:30:00	6.1683	34.692	274.892	89.2455	0.7686	1.17695	1.6506	7.7	4.82	275	0	0	0.335965
2015-01-27 07:45:00	6.1728	34.677	274.198	89.0919	0.7442	1.14816	1.6254	7.6	4.96	275	0	0	0.335965
2015-01-27 08:00:00	6.1908	34.679	274.563	89.221	0.8052	1.22014	1.5876	7.7	4.82	276	6.58258	1.34386	0.839913
2015-01-27 08:15:00	6.1863	34.674	274.872	89.3082	0.732	1.13376	1.6128	7.9	5.97	279	19.7481	4.03158	1.84781
2015-01-27 08:30:00	6.1863	34.653	274.56	89.1971	0.7076	1.10497	1.6002	7.8	4.31	275	42.7908	9.07106	3.69562
2015-01-27 08:45:00	6.1773	34.642	275.47	89.4799	0.7442	1.14816	1.6758	7.8	6.3	261	65.8331	14.6145	5.87939
2015-01-27 09:00:00	6.1683	34.651	276.098	89.6524	0.732	1.13376	1.7262	7.8	6.33	283	88.8762	20.9978	9.23904
2015-01-27 09:15:00	6.137	34.652	276.116	89.6091	0.7564	1.16255	1.6317	8.1	8.39	265	200.791	29.9009	13.4386
2015-01-27 09:30:00	6.1235	34.635	276.987	89.8323	0.7564	1.16255	1.5687	8.1	5.37	264	213.959	35.6123	16.9662
2015-01-27 09:45:00	6.1012	34.658	276.816	89.7508	0.7442	1.14816	1.5435	8.2	7.44	270	266.62	42.6676	21.3338
2015-01-27 10:00:00	6.0967	34.662	277.376	89.9416	0.7442	1.14816	1.5057	8.4	5.68	282	283.059	51.5706	26.7092
2015-01-27 10:15:00	6.0878	34.672	277.333	89.899	0.7076	1.10497	1.5183	8.4	5.33	269	200.763	52.7465	30.0689
2015-01-27 10:30:00	6.0922	34.677	278.501	90.3077	0.5978	0.975404	1.5876	9	6.6	277	628.615	76.4321	41.6597
2015-01-27 10:45:00	6.1146	34.665	278.71	90.4173	0.61	0.9898	1.5246	9.2	5.68	286	635.197	80.6316	45.5233
2015-01-27 11:00:00	6.1146	34.675	278.517	90.3604	0.5978	0.975404	1.5687	9.8	8.58	304	622.032	83.6553	49.3869
2015-01-27 11:15:00	6.1414	34.668	279.059	90.5821	0.5612	0.932216	1.5939	10	10.12	305	674.691	90.3746	54.5943
2015-01-27 11:30:00	6.1504	34.628	279.448	90.7045	0.7076	1.10497	1.5372	10.1	8.73	311	431.144	82.9823	53.2497
2015-01-27 11:45:00	6.1459	34.653	279.503	90.7273	0.5856	0.961008	1.5939	10.1	10.17	298	845.832	110.358	68.365
2015-01-27 12:00:00	6.1146	34.654	282.652	91.6086	0.488	0.84584	1.4679	10.1	8.31	303	990.644	120.429	74.4076
2015-01-27 12:15:00	6.1146	34.665	281.043	91.1741	0.5856	0.961008	1.4931	9.8	8.36	302	654.944	95.3986	61.9755
2015-01-27 12:30:00	6.1459	34.674	281.685	91.5793	0.6344	1.01859	1.6506	9.9	9.99	319	549.626	88.0067	58.2792
2015-01-27 12:45:00	6.2043	34.655	282.984	92.0102	0.5978	0.975404	1.5309	9.8	8.08	307	763.553	109.169	71.2118
2015-01-27 13:00:00	6.2267	34.684	283.752	92.3181	0.5978	0.975404	1.512	9.8	10.47	312	618.741	96.3956	63.3121
2015-01-27 13:15:00	6.2538	34.697	282.204	91.8425	0.6344	1.01859	1.4427	9.8	11.57	309	552.917	86.6561	57.2669
2015-01-27 13:30:00	6.2853	34.665	282.986	92.3007	0.671	1.06178	1.4238	9.5	10.13	305	490.385	75.906	49.7084
2015-01-27 13:45:00	6.3486	34.672	284.508	92.7606	0.6466	1.03299	1.4994	9.6	9.01	301	454.182	71.373	46.5184
2015-01-27 14:00:00	6.3804	34.619	286.64	93.5258	0.6466	1.03299	1.3671	9.6	9.96	302	444.309	71.2049	45.8466
2015-01-27 14:15:00	6.3622	34.556	290.404	94.7251	0.6954	1.09057	1.5246	9.6	9.27	301	477.22	73.8951	47.1921
2015-01-27 14:30:00	6.3215	34.495	293.82	95.7274	0.7076	1.10497	1.7388	9.6	8.15	302	424.562	67.5163	42.4916
2015-01-27 14:45:00	6.3577	34.509	296.677	96.6246	0.7076	1.10497	1.6254	9.9	7.02	303	404.815	65.3337	40.6446
2015-01-27 15:00:00	6.3667	34.5	297.723	97.0234	0.7076	1.10497	1.6758	9.9	8.64	289	437.726	68.0204	40.8123
2015-01-27 15:15:00	6.3894	34.528	298.419	97.3431	0.6954	1.09057	1.4994	9.9	12.05	295	365.32	59.7906	35.2698
2015-01-27 15:30:00	6.3985	34.499	299.113	97.6473	0.7198	1.11936	1.4805	9.7	8.61	295	338.991	57.6082	32.751
2015-01-27 15:45:00	6.444	34.554	300.15	98.0429	0.6832	1.07618	1.3986	10.5	10.26	309	450.891	58.28	30.7356
2015-01-27 16:00:00	6.4713	34.578	300.974	98.4353	0.7076	1.10497	1.2726	10.1	6.25	306	556.209	55.7601	27.7121
2015-01-27 16:15:00	6.5033	34.576	302.041	98.8262	0.6832	1.07618	1.3671	10.2	7.95	320	273.168	42.3244	20.9943
2015-01-27 16:30:00	6.5033	34.596	301.493	98.6709	0.6466	1.03299	1.449	10	7.27	324	253.421	35.774	16.6274
2015-01-27 16:45:00	6.5398	34.62	302.883	99.2174	0.6466	1.03299	1.4553	10.3	10.34	326	345.573	27.5445	12.2607
2015-01-27 17:00:00	6.549	34.631	302.789	99.1939	0.6344	1.01859	1.5687	10.1	7.41	315	131.647	18.6429	8.22976
2015-01-27 17:15:00	6.5581	34.642	303.107	99.327	0.6222	1.0042	1.4553	9.9	7.38	321	95.4441	12.4284	5.20647
2015-01-27 17:30:00	6.5627	34.658	303.405	99.4458	0.6466	1.03299	1.5372	9.3	7.23	311	36.2029	6.55007	2.85516
2015-01-27 17:45:00	6.549	34.651	305.074	99.9773	0.6344	1.01859	1.4868	9.4	9.43	325	13.1647	2.51926	1.17566
2015-01-27 18:00:00	6.5673	34.653	305.059	99.9957	0.671	1.06178	1.3104	9.2	8.65	310	0	0.335906	0.503859
2015-01-27 18:15:00	6.5352	34.645	304.501	99.742	0.6466	1.03299	1.2726	9.1	9.05	314	0	0	0.335908
2015-01-27 18:30:00	6.5261	34.614	302.021	98.812	0.7808	1.19134	1.5939	8.9	7.22	321	0	0	0.503863
2015-01-27 18:45:00	6.4941	34.595	301.756	98.6805	0.8052	1.22014	1.4679	8.6	7.93	308	0	0	0.167961
2015-01-27 19:00:00	6.5352	34.645	302.496	98.9659	0.7808	1.19134	1.5876	8.3	7.45	305	0	0	0.167976
2015-01-27 19:15:00	6.3804	34.537	302.026	98.5472	0.793	1.20574	1.5624	8.3	6.92	308	0	0.167981	0.335961
2015-01-27 19:30:00	6.3894	34.559	301.515	98.373	0.7808	1.19134	1.512	8.2	6.92	308	0	0	0.167982
2015-01-27 19:45:00	6.3758	34.522	301.809	98.4342	0.7686	1.17695	1.512	8.2	7.8	316	0	0	0.167983
2015-01-27 20:00:00	6.3713	34.547	302.884	98.8008	0.7564	1.16255	1.4427	8.1	10.54	303	0	0	0.167983
2015-01-27 20:15:00	6.3667	34.602	302.628	98.7098	0.7564	1.16255	1.3986	8.1	9.64	304	0	0	0.335965
2015-01-27 20:30:00	6.3486	34.58	299.564	97.5998	0.7808	1.19134	1.5561	7.9	7.25	304	0	0	0.167983
2015-01-27 20:45:00	6.3034	34.544	299.29	97.4445	0.7686	1.17695	1.5246	7.9	7.97	314	0	0	0.335965
2015-01-27 21:00:00	6.2989	34.538	299.791	97.5502	0.7808	1.19134	1.638	8	8.52	313	0	0.167983	0.335965
2015-01-27 21:15:00	6.2763	34.561	298.857	97.1752	0.7564	1.16255	1.5246	7.9	10.27	306	0	0.167983	0.167983
2015-01-27 21:30:00	6.2447	34.532	297.394	96.6608	0.7808	1.19134	1.6632	7.7	9.78	297	0	0	0.167983
2015-01-27 21:45:00	6.2583	34.518	298.322	97.0175	0.732	1.13376	1.6002	7.7	12.15	315	0	0.167983	0.335965
2015-01-27 22:00:00	6.2402	34.567	294.937	95.7909	0.7686	1.17695	1.6569	7.5	6.49	310	0	0	0.335965
2015-01-27 22:15:00	6.2132	34.554	296.29	96.2762	0.732	1.13376	1.4553	7.5	9.75	300	0	0	0.167983
2015-01-27 22:30:00	6.1638	34.501	295.475	95.8737	0.7442	1.14816	1.6695	7.4	9.72	302	0	0	0.167983
2015-01-27 22:45:00	6.1235	34.532	292.538	94.8095	0.7442	1.14816	1.4868	7.4	9.3	303	0	0	0.167983
2015-01-27 23:00:00	6.0878	34.497	292.918	94.8489	0.7686	1.17695	1.6128	7.3	11.2	305	0	0	0.167983
2015-01-27 23:15:00	6.0655	34.489	292.695	94.7415	0.732	1.13376	1.4679	7.2	6.75	312	0	0	0.167983
2015-01-27 23:30:00	6.0565	34.529	288.578	93.269	0.7686	1.17695	1.7262	7.2	10.15	315	0	0.167983	0.167983
2015-01-27 23:45:00	5.9942	34.51	290.269	93.7934	0.7442	1.14816	1.701	7.1	7.56	308	0	0.167983	0.167983
2015-01-28	5.9587	34.474	288.912	93.2719	0.7198	1.11936	1.575	7	9.13	302	0	0	0.167983
2015-01-28 00:15:00	5.9631	34.5	289.885	93.6118	0.7198	1.11936	1.5561	7	8.95	308	0	0	0.167983
2015-01-28 00:30:00	5.9631	34.541	288.823	93.243	0.732	1.13376	2.1483	6.9	9.64	295	0	0	0.503947
2015-01-28 00:45:00	5.8879	34.484	286.275	92.2432	0.7564	1.16255	1.8711	6.9	7.31	302	0	0	0.503947
2015-01-28 01:00:00	5.879	34.483	286.888	92.3986	0.7686	1.17695	1.9971	6.8	12.36	321	0	0	0.167983
2015-01-28 01:15:00	5.8482	34.473	287.728	92.6634	0.7442	1.14816	2.016	6.6	11.12	312	0	0.167983	0.503947
2015-01-28 01:30:00	5.8217	34.459	285.826	91.9406	0.8052	1.22014	1.9404	6.6	10.69	310	0	0.33598	0.16799
2015-01-28 01:45:00	5.7953	34.486	287.052	92.3313	0.6954	1.09057	1.953	6.6	12.12	313	0	0	0.167993
2015-01-28 02:00:00	5.769	34.471	284.361	91.3149	0.7442	1.14816	2.1042	6.6	8.24	320	0	0.167989	0.167989
2015-01-28 02:15:00	5.7076	34.42	284.099	91.0685	0.7564	1.16255	1.9467	6.6	10.57	320	0	0.167997	0.167997
2015-01-28 02:30:00	5.6552	34.328	283.996	90.9298	0.7564	1.16255	1.7892	6.6	9.72	316	0	0	0.168004
2015-01-28 02:45:00	5.6203	34.312	284.509	91.0057	0.793	1.20574	2.1546	6.7	8.64	314	0	0.168001	0.336001
2015-01-28 03:00:00	5.6116	34.341	283.978	90.7947	0.732	1.13376	1.8522	6.7	8.9	310	0	0	0.336016
2015-01-28 03:15:00	5.5942	34.369	283.715	90.7461	0.7198	1.11936	1.7829	6.8	9.16	315	0	0	0.168006
2015-01-28 03:30:00	5.5725	34.35	283.667	90.6387	0.732	1.13376	1.701	6.7	9.89	310	0	0.168006	0.168006
2015-01-28 03:45:00	5.5334	34.307	283.832	90.6163	0.7442	1.14816	2.016	6.6	8.5	311	0	0	0.336012
2015-01-28 04:00:00	5.5161	34.293	283.491	90.4315	0.732	1.13376	1.7514	6.5	6.54	306	0	0.168007	0.168007
2015-01-28 04:15:00	5.4772	34.239	283.463	90.3179	0.7198	1.11936	1.6191	6.7	5.93	307	0	0	0.504041
2015-01-28 04:30:00	5.4642	34.231	283.649	90.3222	0.7198	1.11936	1.9278	6.8	5.37	312	0	0	0.504035
2015-01-28 04:45:00	5.434	34.21	283.807	90.3219	0.6954	1.09057	1.8081	6.9	9.35	326	0	0	0.168009
2015-01-28 05:00:00	5.4211	34.223	283.82	90.2918	0.6832	1.07618	1.5939	6.9	6.3	310	0	0	0.504029
2015-01-28 05:15:00	5.3995	34.224	283.554	90.1693	0.6832	1.07618	1.638	7	6.18	312	0	0.168012	0.168012
2015-01-28 05:30:00	5.3909	34.202	283.062	89.9699	0.6954	1.09057	1.5939	6.9	6.76	315	0	0	0.336017
2015-01-28 05:45:00	5.3866	34.185	283.234	90.0339	0.6832	1.07618	1.7199	6.8	5.18	298	0	0.168008	0.168008
2015-01-28 06:00:00	5.3952	34.176	283.413	90.0942	0.671	1.06178	1.7136	6.8	6.37	300	0	0	0.168012
2015-01-28 06:15:00	5.3952	34.197	283.429	90.114	0.671	1.06178	1.6569	6.7	4.82	309	0	0.168008	0.336016
2015-01-28 06:30:00	5.4038	34.188	282.808	89.9097	0.6466	1.03299	1.7199	6.7	3.5	298	0	0.168016	0.168016
2015-01-28 06:45:00	5.3952	34.208	282.951	89.9572	0.6832	1.07618	1.6632	6.6	5.15	305	0	0.16801	0.16801
2015-01-28 07:00:00	5.3866	34.206	282.988	89.9377	0.7076	1.10497	1.6191	6.6	5.17	311	0	0	0.336051
2015-01-28 07:15:00	5.3609	34.19	282.498	89.7355	0.671	1.06178	1.5876	6.5	4.28	310	0	0.168023	0.336047
2015-01-28 07:30:00	5.3523	34.21	281.741	89.4662	0.671	1.06178	1.5309	6.4	4.12	308	0	0	0.168025
2015-01-28 07:45:00	5.3609	34.201	280.797	89.2099	0.671	1.06178	1.5939	6.5	4.26	296	0	0	0.168032
2015-01-28 08:00:00	5.3694	34.203	280.889	89.2729	0.6588	1.04738	1.6695	6.2	4.09	300	6.58447	1.00816	0.672107
2015-01-28 08:15:00	5.4254	34.25	280.616	89.3355	0.6344	1.01859	1.6254	6.1	4.87	274	26.338	4.20072	1.84831
2015-01-28 08:30:00	5.3909	34.212	280.698	89.2903	0.6344	1.01859	1.6254	6.3	5.78	283	42.7993	9.74602	4.03284
2015-01-28 08:45:00	5.3823	34.21	281.581	89.5101	0.61	0.9898	1.5561	6.5	5.03	285	75.7219	15.9631	6.88932
2015-01-28 09:00:00	5.4211	34.244	282.573	89.9558	0.6222	1.0042	1.6695	6.4	6.41	298	154.736	25.3727	10.922
2015-01-28 09:15:00	5.3222	34.209	283.672	90.0438	0.6222	1.0042	1.449	6.9	6.33	307	424.701	35.622	15.7947
2015-01-28 09:30:00	5.3265	34.215	284.511	90.3338	0.6344	1.01859	1.5246	7.7	8.21	313	523.469	45.8715	21.6756
2015-01-28 09:45:00	5.3437	34.218	284.625	90.3691	0.5978	0.975404	1.5813	7.7	5.3	328	464.169	51.5853	26.7168
2015-01-28 10:00:00	5.3995	34.235	284.423	90.5713	0.5124	0.874632	1.4679	7.8	10.62	319	576.055	64.6775	34.4387
2015-01-28 10:15:00	5.378	34.246	285.422	90.628	0.4514	0.802652	1.3734	8	8.22	322	674.744	75.5927	41.9959
2015-01-28 10:30:00	5.3437	34.187	285.341	90.661	0.488	0.84584	1.4175	8.2	7.79	319	766.854	87.015	50.2268
2015-01-28 10:45:00	5.3094	34.18	286.237	90.8661	0.4514	0.802652	1.449	8.7	7.12	321	905.074	102.301	60.3057
2015-01-28 11:00:00	5.3523	34.178	286.012	90.8326	0.5368	0.903424	1.5876	8.6	9.93	319	434.435	82.1435	53.5864
[truncated: 10,657 more rows]

## Sheet: High Freq 2016
Date	Temperature	Concentration O2	Saturation O2	Chlorophyll a fluorescence	Chl a corrected	Turbidity	Temp_Air	Speed_Wind	Direction_Wind	PAR	UVA	UVB
2015-12-01 10:30:00		281.386	102.952	0.6588	1.19796	1.1907	12.1	3.96	255	664.816	77.4185	49.3732
2015-12-01 10:45:00		274.591	100.525	0.6588	1.19796	1.2033	12.5	3.15	267	724.054	83.6274	55.7516
2015-12-01 11:00:00		277.25	101.505	0.6466	1.1793	1.2033	12.7	2.98	261	776.696	90.3428	61.4599
2015-12-01 11:15:00		281.889	103.243	0.5978	1.10463	1.1781	13	3.19	266	819.495	95.7039	66.4891
2015-12-01 11:30:00		287.45	106.418	0.5124	0.973972	1.3041	13.2	3.23	258	858.91	100.572	71.1893
2015-12-01 11:45:00		274.683	101.999	0.5124	0.973972	1.5183	13.6	2.34	286	894.962	104.6	75.2184
2015-12-01 12:00:00		284.498	106.081	0.4636	0.899308	1.512	13.6	3.1	256	921.225	107.79	77.9047
2015-12-01 12:15:00		292.306	108.933	0.4392	0.861976	1.3104	14	1.53	262	937.671	109.457	79.5746
2015-12-01 12:30:00		310.089	115.802	0.4148	0.824644	1.3104	14.2	3.16	248	954.121	110.795	80.578
2015-12-01 12:45:00		303.301	113.047	0.427	0.84331	1.2537	14.6	2.44	239	957.316	110.456	80.24
2015-12-01 13:00:00		299.679	112.219	0.427	0.84331	1.3608	14.9	2.06	266	950.725	109.449	79.233
2015-12-01 13:15:00		298.3	111.392	0.5002	0.955306	1.26	15.5	0.92	261	937.466	106.587	76.8766
2015-12-01 13:30:00		300.756	112.862	0.4392	0.861976	1.3986	16.3	1.14	113	924.217	103.727	73.851
2015-12-01 13:45:00		288.714	109.064	0.4026	0.805978	1.3734	16.2	0.81	76	766.336	82.5677	62.0936
2015-12-01 14:00:00		307.484	115.483	0.3904	0.787312	1.26	16.2	0.35	17	858.427	93.4604	64.4323
2015-12-01 14:15:00		298.272	111.874	0.4758	0.917974	1.2663	16.6	1.73	243	818.914	87.4165	59.0607
2015-12-01 14:30:00		297.374	112.28	0.4514	0.880642	1.3734	16.1	2.23	205	772.798	80.8725	53.0202
2015-12-01 14:45:00		297.77	112.381	0.4758	0.917974	1.3608	16.2	1.91	223	299.249	73.3201	46.643
2015-12-01 15:00:00		294.762	110.917	0.5368	1.0113	1.2537	16.4	2.23	215	654.393	65.092	35.398
2015-12-01 15:15:00		303.298	114.252	0.5124	0.973972	1.2348	17.7	0.05	122	582.015	56.7028	33.552
2015-12-01 15:30:00		293.294	110.232	0.5978	1.10463	1.26	16.6	1.03	114	503.068	47.4753	27.1767
2015-12-01 15:45:00		308.976	116.707	0.488	0.93664	1.2474	16.4	0.82	117	417.566	38.7519	20.9696
2015-12-01 16:00:00		292.128	109.845	0.5002	0.955306	1.1907	15.7	1.39	107	332.079	29.8581	15.4323
2015-12-01 16:15:00		288.833	108.427	0.5246	0.992638	1.2663	16.9	0.63	164	246.593	22.1414	10.7352
2015-12-01 16:30:00		278.303	103.713	0.3782	0.768646	1.1214	16.8	0.73	272	167.681	14.7602	6.7092
2015-12-01 16:45:00		278.307	103.126	0.5368	1.0113	1.1655	15.2	0.61	276	85.4823	8.72214	4.0256
2015-12-01 17:00:00		264.66	97.8169	0.7198	1.29129	1.2159	14.1	0.44	246	32.8789	3.85798	1.67738
2015-12-01 17:15:00		253.474	93.5954	0.8174	1.44062	1.197	13.5	0.26	297	6.57581	1.34203	0.671013
2015-12-01 17:30:00		249.27	91.8283	0.793	1.40329	1.2411	13.1	0.15	151	0	0	0.167757
2015-12-01 17:45:00		246.053	90.6848	0.915	1.58995	1.2474	12.9	0.69	213	0	0.335558	0
2015-12-01 18:00:00		244.814	90.3516	0.9516	1.64595	1.2285	12.5	0.7	176	0	0.335569	0.167785
2015-12-01 18:15:00		243.759	89.9115	0.9882	1.70195	1.1907	12.1	0.59	179	0	0	0
2015-12-01 18:30:00		243.974	90.0315	1.0004	1.72061	1.2033	11.7	0.88	96	0	0.167835	0
2015-12-01 18:45:00		240.717	88.7541	1.0492	1.79528	1.1844	11.5	0.4	206	0	0	0
2015-12-01 19:00:00		245.851	91.0672	0.8418	1.47795	1.197	11.4	0.49	185	0	0	0.167869
2015-12-01 19:15:00		254.459	94.23	0.8418	1.47795	1.1907	10.9	0.61	248	0	0	0
2015-12-01 19:30:00		250.061	92.4214	0.9516	1.64595	1.2411	11.3	1.6	89	0	0	0
2015-12-01 19:45:00		252.505	93.2764	0.7686	1.36596	1.1781	10.8	0.99	188	0	0	0
2015-12-01 20:00:00		264.634	97.8477	0.5612	1.04864	1.1277	12	0.77	120	0	0	0
2015-12-01 20:15:00		272.854	100.594	0.5002	0.955306	1.1277	11.1	0.45	194	0	0	0.167924
2015-12-01 20:30:00		270.647	99.856	0.4758	0.917974	1.071	11.4	1.26	43	0	0	0
2015-12-01 20:45:00		274.861	101.342	0.6466	1.1793	1.0836	11.2	0.49	243	0	0.167941	0
2015-12-01 21:00:00		275.78	101.717	0.5978	1.10463	1.0773	10	0.49	291	0	0	0.167953
2015-12-01 21:15:00		276.093	101.868	0.6832	1.2353	1.0773	10	0.37	337	0	0	0.167957
2015-12-01 21:30:00		271.315	100.068	0.7076	1.27263	1.0899	10.5	0.54	103	0	0	0
2015-12-01 21:45:00		266.974	98.4381	0.732	1.30996	1.1529	10.3	0.5	163	0	0.335955	0.167977
2015-12-01 22:00:00		265.777	98.0597	0.8296	1.45929	1.0962	10.5	0.54	172	0	0	0
2015-12-01 22:15:00		257.987	95.2196	0.7808	1.38462	1.0899	10.4	0.98	43	0	0	0
2015-12-01 22:30:00		256.657	94.7291	0.671	1.21663	1.071	9.4	0.71	104	0	0	0.167983
2015-12-01 22:45:00		262.291	96.7744	0.5734	1.0673	1.0584	9.3	0.38	223	0	0.167983	0.335965
2015-12-01 23:00:00		261.512	96.4766	0.5368	1.0113	1.0521	8.8	0.88	24	0	0.167983	0
2015-12-01 23:15:00		261.917	96.6392	0.7198	1.29129	1.1466	8.5	1.21	28	0	0.167983	0
2015-12-01 23:30:00		262.997	96.9297	0.4758	0.917974	1.0899	8.1	0.83	49	0	0	0
2015-12-01 23:45:00		252.222	92.6453	0.9272	1.60862	1.134	8.1	0.09	35	0	0	0
2015-12-02		252.474	92.7038	0.8662	1.51529	1.1529	7.6	0.83	248	0	0	0
2015-12-02 00:15:00		252.279	92.7018	0.8662	1.51529	1.2033	7.9	0.93	322	0	0	0
2015-12-02 00:30:00		263.959	97.1173	0.7442	1.32863	1.1592	7	0.63	257	0	0	0
2015-12-02 00:45:00		273.9	100.921	0.6588	1.19796	1.1088	6.9	0.34	271	0	0	0
2015-12-02 01:00:00		253.5	93.4312	0.7076	1.27263	1.071	7	1.65	273	0	0	0
2015-12-02 01:15:00		258.793	95.2007	0.7564	1.34729	1.1088	6.7	1.83	270	0	0	0
2015-12-02 01:30:00		260.43	95.8188	0.6344	1.16063	1.071	6.3	1.39	278	0	0	0.168029
2015-12-02 01:45:00		261.677	96.2065	0.671	1.21663	1.071	6.7	0.85	261	0	0	0
2015-12-02 02:00:00		261.243	96.0804	0.6832	1.2353	1.0647	6.8	1.44	266	0	0	0.168026
2015-12-02 02:15:00		258.117	94.9617	0.6588	1.19796	1.0836	6.8	0.48	255	0	0	0.168025
2015-12-02 02:30:00		260.815	95.967	0.7198	1.29129	1.0773	6.7	0.86	272	0	0	0.168021
2015-12-02 02:45:00		255.417	93.9227	0.732	1.30996	1.1592	6.6	1.19	322	0	0	0.16803
2015-12-02 03:00:00		257.052	94.5557	0.915	1.58995	1.1466	6.7	1.47	284	0	0	0.168029
2015-12-02 03:15:00		258.085	94.9199	0.6344	1.16063	1.1403	6.2	2.87	271	0	0	0.168034
2015-12-02 03:30:00		258.302	94.8794	0.6344	1.16063	1.0962	5.7	1.39	276	0	0	0
2015-12-02 03:45:00		258.877	94.9246	0.61	1.1233	1.0836	6.2	2.04	267	0	0	0.168039
2015-12-02 04:00:00		258.922	94.9071	0.6222	1.14197	1.0773	6.3	2.19	304	0	0.168038	0
2015-12-02 04:15:00		260.728	95.5206	0.6344	1.16063	1.0773	6.4	1.05	298	0	0.336076	0.168038
2015-12-02 04:30:00		263.785	96.7387	0.671	1.21663	1.1025	6.2	2.06	284	0	0	0.168039
2015-12-02 04:45:00		264.306	96.7851	0.6466	1.1793	1.0899	6.1	1.36	270	0	0	0
2015-12-02 05:00:00		262.434	96.0562	0.6588	1.19796	1.1214	6.3	0.76	275	0	0	0.168039
2015-12-02 05:15:00		262.894	96.1489	0.6466	1.1793	1.1025	6.4	1.1	292	0	0	0
2015-12-02 05:30:00		259.843	94.9619	0.6466	1.1793	1.1277	6.2	1.5	336	0	0	0.168039
2015-12-02 05:45:00		259.208	94.6928	0.6832	1.2353	1.1025	6.1	1.66	279	0	0	0.168039
2015-12-02 06:00:00		255.053	93.2116	0.732	1.30996	1.1025	5.7	2.49	267	0	0	0.168039
2015-12-02 06:15:00		250.098	91.4884	0.7076	1.27263	1.1214	5.7	2.41	279	0	0	0
2015-12-02 06:30:00		249.526	91.2593	0.7442	1.32863	1.1781	5.8	1.67	303	0	0	0
2015-12-02 06:45:00		250.038	91.3857	0.7198	1.29129	1.1907	6	1.45	338	0	0	0.168039
2015-12-02 07:00:00		249.446	91.1474	0.732	1.30996	1.1781	6.1	1.85	267	0	0	0
2015-12-02 07:15:00		248.377	90.6991	0.7198	1.29129	1.1403	6.2	1.93	286	0	0	0
2015-12-02 07:30:00		247.916	90.4891	0.7198	1.29129	1.1655	6.7	1.44	260	0	0	0
2015-12-02 07:45:00		246.74	89.9941	0.7198	1.29129	1.1529	7	1.5	293	0	0.168039	0.336078
2015-12-02 08:00:00		249.96	91.2422	0.6222	1.14197	1.1655	6.6	1.7	317	19.754	2.18451	1.00823
2015-12-02 08:15:00		258.112	94.101	0.549	1.02997	1.1907	6	1.38	308	36.2155	5.71333	2.35255
2015-12-02 08:30:00		265.98	96.9774	0.5368	1.0113	1.1529	6.3	1.87	306	62.5527	11.0906	4.53705
2015-12-02 08:45:00		274.049	99.8906	0.5368	1.0113	1.1718	5.9	1.89	285	82.3059	17.8121	7.72979
2015-12-02 09:00:00		273.714	99.7306	0.3904	0.787312	1.1403	6.1	1.27	317	237.041	24.8698	11.7627
2015-12-02 09:15:00		278.016	101.321	0.5856	1.08597	1.1466	6.4	2.42	269	309.47	32.5996	16.2998
2015-12-02 09:30:00		275.358	100.344	0.5856	1.08597	1.1655	6.8	1.72	284	378.607	40.4974	21.509
2015-12-02 09:45:00		285.066	104.019	0.5734	1.0673	1.1151	7.3	0.45	298	451.037	48.8961	27.2205
2015-12-02 10:00:00		293.624	107.04	0.5124	0.973972	1.1403	7.1	1.69	284	526.758	57.6335	33.2695
2015-12-02 10:15:00		286.782	104.698	0.6466	1.1793	1.1907	7.9	1.73	297	582.682	65.3516	39.3117
2015-12-02 10:30:00		284.486	103.608	0.488	0.93664	1.1403	8.1	1.35	284	641.887	72.7372	45.3558
2015-12-02 10:45:00		287.097	104.541	0.5002	0.955306	1.1025	8.6	1.22	308	684.607	80.1278	51.2347
2015-12-02 11:00:00		297.884	109.117	0.4514	0.880642	1.1655	8.8	0.7	269	753.679	86.511	57.1141
2015-12-02 11:15:00		283.845	105.42	0.427	0.84331	1.1907	9.3	1.6	310	799.751	92.3803	62.1467
2015-12-02 11:30:00		295.645	110.125	0.4148	0.824644	1.3041	10	0.96	322	809.624	95.055	65.1613
2015-12-02 11:45:00		288.216	108.176	0.3904	0.787312	1.3419	10.8	1	301	615.446	86.6509	62.4693
2015-12-02 12:00:00		291.328	109.358	0.3538	0.731314	1.3293	11.7	0.19	197	911.622	101.919	71.3602
2015-12-02 12:15:00		285.799	107.495	0.4392	0.861976	1.3293	11.6	0.3	27	931.195	104.433	73.8755
2015-12-02 12:30:00		305.823	114.687	0.4148	0.824644	1.3608	11.9	0.56	38	937.682	103.76	73.5384
2015-12-02 12:45:00		305.832	115.859	0.3782	0.768646	1.4553	11.8	1.19	97	977.152	103.243	72.5218
2015-12-02 13:00:00		310.701	117.472	0.4148	0.824644	1.4553	11.8	0.68	101	740.197	90.1463	64.7979
2015-12-02 13:15:00		315.61	119.205	0.4148	0.824644	1.4427	12	1.76	147	740.142	89.2953	63.4467
2015-12-02 13:30:00		330.673	124.639	0.4148	0.824644	1.4049	12.7	1.03	263	588.742	86.4388	62.1016
2015-12-02 13:45:00		309.716	115.992	0.427	0.84331	1.3041	12.7	0.79	312	670.955	99.6979	67.6402
2015-12-02 14:00:00		321.87	122.075	0.3538	0.731314	1.3608	13.3	0.69	17	792.647	88.4432	59.4096
2015-12-02 14:15:00		321.907	121.789	0.427	0.84331	1.3482	13.2	1.41	283	812.381	85.0818	55.0431
2015-12-02 14:30:00		306.858	116.43	0.427	0.84331	1.26	13.6	0.49	254	766.335	78.1926	49.6674
2015-12-02 14:45:00		314.542	118.983	0.4392	0.861976	1.26	13.8	1.5	110	220.362	69.9671	43.289
2015-12-02 15:00:00		284.18	108.267	0.3904	0.787312	1.2915	12.7	0.35	201	207.206	45.9732	30.2014
2015-12-02 15:15:00		289.175	110.043	0.4026	0.805978	1.3734	12.7	0.74	141	266.408	44.6309	26.8456
2015-12-02 15:30:00		309.935	117.981	0.3782	0.768646	1.3356	12.2	1.24	137	266.401	39.2617	22.1476
2015-12-02 15:45:00		309.041	117.231	0.4148	0.824644	1.2537	12.1	2.03	125	207.206	29.698	16.1074
2015-12-02 16:00:00		283.653	106.988	0.4514	0.880642	1.3293	12.3	1.59	137	187.472	23.1549	11.5775
2015-12-02 16:15:00		294.702	110.745	0.4758	0.917974	1.197	13	1.32	127	259.83	18.1231	8.39034
2015-12-02 16:30:00		291.185	108.736	0.3904	0.787312	1.2285	12.8	1.01	130	128.273	12.7552	5.3706
2015-12-02 16:45:00		278.368	104.038	0.3782	0.768646	1.1781	13.1	0.81	202	69.0803	7.72086	3.35689
2015-12-02 17:00:00		267.369	100.002	0.4148	0.824644	1.1655	12.4	0.41	151	26.3171	4.02879	1.67866
2015-12-02 17:15:00		260.593	97.2354	0.4758	0.917974	1.1592	11.5	0.61	214	6.57913	1.17509	0.335739
2015-12-02 17:30:00		255.263	95.6038	0.4636	0.899308	1.1529	10.9	0.46	181	0	0.167868	0.167868
2015-12-02 17:45:00		250.348	93.7404	0.5246	0.992638	1.3923	10.8	0.46	152	0	0	0
2015-12-02 18:00:00		248.687	93.1802	0.61	1.1233	1.197	10.4	0.25	226	0	0	0
2015-12-02 18:15:00		255.236	95.2841	0.7198	1.29129	1.2726	9.8	0.52	214	0	0	0
2015-12-02 18:30:00		255.357	94.9959	0.671	1.21663	1.197	9.6	0.26	237	0	0	0
2015-12-02 18:45:00		253.382	93.5672	0.793	1.40329	1.1718	9.3	0.25	214	0	0	0.167899
2015-12-02 19:00:00		260.723	96.226	0.6222	1.14197	1.1529	9.6	0.9	277	0	0	0
2015-12-02 19:15:00		268.038	98.9101	0.5368	1.0113	1.1088	9.1	0.61	237	0	0	0.167928
2015-12-02 19:30:00		261.988	96.6115	0.671	1.21663	1.1466	9.2	1.2	288	0	0	0.167951
2015-12-02 19:45:00		262.1	96.6786	0.6832	1.2353	1.2159	9.3	1.02	275	0	0	0
2015-12-02 20:00:00		261.144	96.3568	0.6466	1.1793	1.2285	8.6	1.81	284	0	0	0.167977
2015-12-02 20:15:00		264.809	97.7199	0.6954	1.25396	1.1214	8.4	1.32	263	0	0.167982	0
2015-12-02 20:30:00		272.214	100.517	0.5612	1.04864	1.1025	8.7	1.17	254	0	0	0
2015-12-02 20:45:00		273.545	101.038	0.549	1.02997	1.1151	8.3	0.63	252	0	0	0
2015-12-02 21:00:00		266.284	98.4953	0.5856	1.08597	1.1025	8.6	0.94	270	0	0	0.167983
2015-12-02 21:15:00		260.562	96.7369	0.61	1.1233	1.134	8.9	2.33	292	0	0.167983	0.167983
2015-12-02 21:30:00		263.068	97.5722	0.5978	1.10463	1.1214	8.2	1.97	298	0	0	0.167983
2015-12-02 21:45:00		259.084	96.1403	0.671	1.21663	1.1655	8.4	1.86	300	0	0.167983	0
2015-12-02 22:00:00		252.238	93.4809	0.7198	1.29129	1.1403	8.3	1.48	306	0	0	0.167983
2015-12-02 22:15:00		265.308	98.1342	0.671	1.21663	1.1025	8.5	1.16	274	0	0	0.167983
2015-12-02 22:30:00		261.149	96.7731	0.7076	1.27263	1.1403	9	0.42	327	0	0.335965	0.167983
2015-12-02 22:45:00		250.465	92.3702	0.7564	1.34729	1.1907	8.9	0.88	256	0	0	0.167983
2015-12-02 23:00:00		250.175	92.2246	0.7442	1.32863	1.1844	9.5	0.34	37	0	0	0
2015-12-02 23:15:00		249.493	92.0036	0.6832	1.2353	1.1781	8.9	2.44	287	0	0	0
2015-12-02 23:30:00		247.871	91.4145	0.6588	1.19796	1.1529	8.5	1.5	255	0	0	0
2015-12-02 23:45:00		245.155	90.3904	0.7442	1.32863	1.2159	8.3	0.8	219	0	0	0.167983
2015-12-03		246.254	90.5342	0.61	1.1233	1.1088	7.9	0.58	226	0	0	0.167983
2015-12-03 00:15:00		245.421	90.4562	0.671	1.21663	1.197	7.7	1.13	222	0	0.167983	0
2015-12-03 00:30:00		244.076	89.9154	0.671	1.21663	1.1592	8	0.65	264	0	0	0.167983
2015-12-03 00:45:00		243.042	89.5352	0.6344	1.16063	1.1907	7.7	0.7	237	0	0	0.167983
2015-12-03 01:00:00		242.923	89.4169	0.5978	1.10463	1.1655	7.2	0.96	234	0	0	0
2015-12-03 01:15:00		240.261	88.2405	0.7564	1.34729	1.1277	7.2	0.72	245	0	0	0.167996
2015-12-03 01:30:00		246.911	90.6468	0.6344	1.16063	1.1529	7.7	0.8	295	0	0	0.168013
2015-12-03 01:45:00		247.531	90.914	0.671	1.21663	1.1529	8	1.39	326	0	0	0
2015-12-03 02:00:00		258.667	95.2082	0.6832	1.2353	1.1781	7.5	1.2	315	0	0	0.168025
2015-12-03 02:15:00		267.666	98.657	0.5978	1.10463	1.1844	7.2	1.92	311	0	0.168029	0
2015-12-03 02:30:00		260.86	96.0992	0.5978	1.10463	1.1277	7.1	1.54	270	0	0	0.168024
2015-12-03 02:45:00		256.199	94.3167	0.549	1.02997	1.0899	7.2	1.61	282	0	0	0
2015-12-03 03:00:00		246.814	90.8763	0.5856	1.08597	1.1277	7.4	1.55	256	0	0	0.168032
2015-12-03 03:15:00		250.84	92.5005	0.5002	0.955306	1.1151	7.2	1.63	261	0	0	0.168029
2015-12-03 03:30:00		252.444	92.9534	0.6832	1.2353	1.1277	7.3	1.41	295	0	0.168029	0
2015-12-03 03:45:00		248.252	91.3225	0.5246	0.992638	1.071	7.4	2.25	288	0	0	0
2015-12-03 04:00:00		248.754	91.3234	0.5978	1.10463	1.1151	7.4	1.39	258	0	0	0
2015-12-03 04:15:00		248.817	91.3257	0.6222	1.14197	1.1592	7.5	1.2	301	0	0	0
2015-12-03 04:30:00		248.648	91.2538	0.6344	1.16063	1.1277	7.4	2	295	0	0	0
2015-12-03 04:45:00		248.93	91.2711	0.6832	1.2353	1.1466	7.3	1.17	275	0	0	0
2015-12-03 05:00:00		247.503	90.7274	0.6344	1.16063	1.134	7.5	1.82	256	0	0	0.168024
2015-12-03 05:15:00		248.304	91.0619	0.6222	1.14197	1.1214	7.5	1.54	285	0	0.168017	0
2015-12-03 05:30:00		247.801	90.8251	0.6466	1.1793	1.1403	7.5	1.29	324	0	0	0.168011
2015-12-03 05:45:00		246.828	90.4064	0.6466	1.1793	1.1592	7.5	0.81	241	0	0	0
2015-12-03 06:00:00		244.46	89.4716	0.6588	1.19796	1.1403	7.4	0.96	264	0	0	0.168011
2015-12-03 06:15:00		244.025	89.276	0.6222	1.14197	1.1403	7.8	0.98	22	0	0.168016	0
2015-12-03 06:30:00		243.29	89.0099	0.5978	1.10463	1.134	7.3	0.65	197	0	0.504052	0
2015-12-03 06:45:00		245.499	89.7746	0.61	1.1233	1.1844	7.2	0.85	218	0	0	0.168016
2015-12-03 07:00:00		243.269	88.7957	0.5734	1.0673	1.1781	7.7	0.78	227	0	0.168025	0.168025
2015-12-03 07:15:00		237.563	86.643	0.61	1.1233	1.1655	7.9	1.4	301	0	0	0.168022
2015-12-03 07:30:00		242.339	88.415	0.61	1.1233	1.1592	7.9	0.92	316	0	0.168023	0.168023
2015-12-03 07:45:00		245.894	89.7157	0.61	1.1233	1.1718	7.4	0.89	246	0	0.336056	0.336056
2015-12-03 08:00:00		249.513	91.0808	0.5368	1.0113	1.1403	7	0.33	216	13.169	2.01633	0.840139
2015-12-03 08:15:00		254.608	92.9399	0.5612	1.04864	1.1466	7	0.74	256	26.3379	4.53676	2.01634
2015-12-03 08:30:00		259.684	94.7557	0.549	1.02997	1.1403	7.8	0.79	250	49.3835	8.56964	3.36064
2015-12-03 08:45:00		265.575	96.9026	0.4148	0.824644	1.1844	8.2	0.58	306	88.8904	13.1064	5.37699
2015-12-03 09:00:00		275.082	100.256	0.4148	0.824644	1.1718	8.2	0.77	9	174.488	21.8442	10.082
2015-12-03 09:15:00		284.432	103.686	0.4392	0.861976	1.197	8.4	1.04	351	161.32	29.5725	14.1142
2015-12-03 09:30:00		287.934	104.939	0.4514	0.880642	1.197	8.6	0.75	315	200.826	34.4423	17.8092
2015-12-03 09:45:00		292.171	106.497	0.5002	0.955306	1.1655	8.7	1.32	274	279.817	34.7739	18.4789
2015-12-03 10:00:00		291.364	106.268	0.488	0.93664	1.1529	9	0.88	359	273.213	36.9563	20.6619
2015-12-03 10:15:00		296.012	107.949	0.488	0.93664	1.1466	9.5	1.21	8	332.472	43.6755	25.1974
2015-12-03 10:30:00		296.891	108.301	0.4758	0.917974	1.1592	10	0.59	1	358.757	53.9224	32.9246
2015-12-03 10:45:00		289.774	105.994	0.427	0.84331	1.0836	10.3	0.57	3	319.251	46.8671	29.5649
2015-12-03 11:00:00		301.673	110.21	0.5124	0.973972	1.1592	10.8	0.16	265	385.066	54.4263	34.9404
2015-12-03 11:15:00		309.329	113.436	0.5368	1.0113	1.134	11	0.58	219	460.762	67.3586	44.3458
2015-12-03 11:30:00		328.154	119.936	0.5612	1.04864	1.134	11.7	0.74	106	602.281	81.6283	53.5791
2015-12-03 11:45:00		322.368	118.043	0.4514	0.880642	1.1214	12.5	0.34	173	510.129	77.258	52.737
2015-12-03 12:00:00		316.864	115.893	0.5368	1.0113	1.1151	12.5	1.97	101	572.661	73.2176	49.2036
2015-12-03 12:15:00		326.4	119.314	0.5002	0.955306	1.1214	12.5	0.62	106	1112.38	98.3987	62.8006
2015-12-03 12:30:00		332.696	122.961	0.427	0.84331	1.1844	12.7	1.26	68	556.203	75.3874	52.0492
2015-12-03 12:45:00		335.586	125.61	0.4026	0.805978	1.2474	12.6	2.43	71	575.817	77.5693	53.0561
2015-12-03 13:00:00		319.264	119.832	0.3904	0.787312	1.2789	12.7	3.64	87	398.103	57.589	39.6239
2015-12-03 13:15:00		323.78	121.962	0.4026	0.805978	1.2852	12.8	1.85	84	411.259	61.6186	42.6461
2015-12-03 13:30:00		315.83	118.554	0.4148	0.824644	1.2789	12.7	3.19	72	477.06	70.1814	48.0188
2015-12-03 13:45:00		307.008	115.529	0.427	0.84331	1.2663	12.8	3.35	74	470.48	71.5242	48.0186
2015-12-03 14:00:00		316.56	118.406	0.4392	0.861976	1.2033	12.9	2.55	91	430.999	65.48	43.9891
2015-12-03 14:15:00		317.788	119.18	0.549	1.02997	1.2663	13.1	3.18	97	463.9	61.4506	39.2881
2015-12-03 14:30:00		309.138	116.601	0.4392	0.861976	1.2978	13	3.72	88	365.198	59.7695	37.9436
2015-12-03 14:45:00		308.485	115.956	0.5124	0.973972	1.2411	13.2	3.47	82	388.228	63.2962	37.9441
2015-12-03 15:00:00		312.564	117.097	0.5246	0.992638	1.2096	13.2	3.04	80	467.19	52.3838	29.8856
2015-12-03 15:15:00		300.664	112.445	0.549	1.02997	1.1718	13.3	3.37	75	523.121	52.7198	29.0462
2015-12-03 15:30:00		296.631	111.548	0.5124	0.973972	1.1907	13.4	3.44	84	470.48	44.325	23.5057
2015-12-03 15:45:00		292.311	110.156	0.5124	0.973972	1.2411	13.3	3.19	69	444.16	33.5775	16.7888
2015-12-03 16:00:00		287.095	108.222	0.4636	0.899308	1.1844	13.3	4.13	98	299.397	27.3637	13.2622
2015-12-03 16:15:00		280.353	105.755	0.4392	0.861976	1.1844	13.3	3.93	89	227.015	19.8087	9.065
2015-12-03 16:30:00		271.023	102.129	0.4514	0.880642	1.2978	13.3	3.71	78	128.313	14.1011	5.70757
2015-12-03 16:45:00		265.63	99.6298	0.5124	0.973972	1.2159	12.9	4.41	82	55.9312	8.22562	3.69314
2015-12-03 17:00:00		252.657	94.8253	0.4636	0.899308	1.1781	12.7	3.29	85	23.0305	3.86101	1.6787
2015-12-03 17:15:00		248.026	93.0478	0.5002	0.955306	1.1781	12.7	3.41	85	3.29007	0.671479	0.33574
2015-12-03 17:30:00		243.935	91.6041	0.5612	1.04864	1.1844	12.4	2.28	75	0	0.167883	0.167883
2015-12-03 17:45:00		243.508	91.2999	0.549	1.02997	1.1466	12.1	1.01	67	0	0	0
2015-12-03 18:00:00		241.668	90.6708	0.5978	1.10463	1.197	12.1	1.38	88	0	0.167898	0.167898
2015-12-03 18:15:00		241.348	90.3876	0.5612	1.04864	1.1592	12.1	0.71	123	0	0.335804	0
2015-12-03 18:30:00		240.302	90.0232	0.6588	1.19796	1.1718	12.4	1.3	83	0	0.167898	0.167898
2015-12-03 18:45:00		238.963	89.4811	0.6466	1.1793	1.197	11.9	1.5	270	0	0	0.167899
2015-12-03 19:00:00		240.614	90.0223	0.6222	1.14197	1.2348	12.1	0.68	280	0	0	0
2015-12-03 19:15:00		259.991	96.9494	0.5612	1.04864	1.1529	12.1	1.97	353	0	0	0
2015-12-03 19:30:00		253.381	94.6934	0.5734	1.0673	1.1781	12.3	2.1	15	0	0	0.167926
2015-12-03 19:45:00		262.728	97.9421	0.549	1.02997	1.134	12	1.62	28	0	0.167926	0.167926
2015-12-03 20:00:00		269.077	100.156	0.61	1.1233	1.1088	11.9	0.48	107	0	0	0
2015-12-03 20:15:00		270.224	100.588	0.5734	1.0673	1.1277	11.8	1.28	304	0	0	0.167926
2015-12-03 20:30:00		266.575	99.4286	0.549	1.02997	1.1025	12.1	0.74	303	0	0	0.167926
2015-12-03 20:45:00		267.754	99.5807	0.549	1.02997	1.1214	12.1	0.94	342	0	0	0.167926
2015-12-03 21:00:00		262.121	97.3269	0.549	1.02997	1.1466	12	1.26	332	0	0	0.167926
2015-12-03 21:15:00		269.591	100.042	0.5368	1.0113	1.1214	11.9	0.35	305	0	0	0
2015-12-03 21:30:00		264.82	98.2693	0.549	1.02997	1.0962	11.9	0.49	122	0	0	0.167926
2015-12-03 21:45:00		262.512	97.564	0.549	1.02997	1.1277	11.9	1.08	64	0	0	0
2015-12-03 22:00:00		260.383	96.6573	0.5002	0.955306	1.1025	12	0.8	40	0	0.167926	0.167926
2015-12-03 22:15:00		255.522	94.8328	0.6222	1.14197	1.1403	11.8	0.4	214	0	0	0
2015-12-03 22:30:00		254.032	94.3037	0.5856	1.08597	1.1907	11.7	0.42	219	0	0	0
2015-12-03 22:45:00		249.025	92.0929	0.6466	1.1793	1.1718	11.9	0.53	301	0	0.167931	0
2015-12-03 23:00:00		248.149	91.5255	0.6466	1.1793	1.1529	11.8	0.73	58	0	0	0.16793
2015-12-03 23:15:00		245.445	90.4928	0.6466	1.1793	1.1529	11.7	0.59	224	0	0	0
2015-12-03 23:30:00		248.998	91.6347	0.6832	1.2353	1.197	11.5	0.71	315	0	0	0
2015-12-03 23:45:00		248.366	91.2075	0.671	1.21663	1.1466	11.6	0.74	300	0	0.167937	0.167937
2015-12-04		246.756	90.6618	0.6588	1.19796	1.1088	11.4	0.48	353	0	0.167945	0
2015-12-04 00:15:00		244.444	89.8068	0.6954	1.25396	1.1403	11.4	0.37	210	0	0.335876	0
2015-12-04 00:30:00		245.764	90.3077	0.671	1.21663	1.1907	11.4	0.55	245	0	0.335879	0
2015-12-04 00:45:00		247.131	90.8385	0.5856	1.08597	1.1529	11	0.58	229	0	0.167943	0.167943
2015-12-04 01:00:00		244.813	90.1334	0.5734	1.0673	1.1529	10.9	0.3	202	0	0	0.167947
2015-12-04 01:15:00		245.963	90.7496	0.549	1.02997	1.1214	11.1	1.45	316	0	0	0
2015-12-04 01:30:00		240.788	88.6353	0.5978	1.10463	1.1466	11.1	0.92	10	0	0.167954	0
2015-12-04 01:45:00		245.153	90.3896	0.5002	0.955306	1.0584	11.1	1.49	30	0	0.167954	0
2015-12-04 02:00:00		252.363	93.1393	0.3904	0.787312	1.0773	11	2.8	38	0	0	0.167954
2015-12-04 02:15:00		256.472	94.8995	0.5368	1.0113	1.1214	10.9	2.06	19	0	0	0
2015-12-04 02:30:00		256.742	95.0733	0.5246	0.992638	1.0836	10.9	1.48	3	0	0.335911	0
2015-12-04 02:45:00		254.166	94.2859	0.4392	0.861976	1.0647	10.7	1.99	23	0	0	0.167955
2015-12-04 03:00:00		254.217	94.0886	0.5368	1.0113	1.0962	10.4	0.58	204	0	0	0.16796
2015-12-04 03:15:00		253.897	94.0506	0.4392	0.861976	1.071	11	1.35	109	0	0.167956	0
2015-12-04 03:30:00		251.846	93.0719	0.5978	1.10463	1.134	10.7	1.11	111	0	0	0
2015-12-04 03:45:00		251.59	93.053	0.5368	1.0113	1.0962	10.5	0.74	90	0	0	0
2015-12-04 04:00:00		248.943	92.0823	0.5124	0.973972	1.1466	10.4	0.47	181	0	0	0.16796
2015-12-04 04:15:00		244.504	90.5397	0.4758	0.917974	1.0962	10.3	0.31	132	0	0	0.167957
2015-12-04 04:30:00		247.481	91.6281	0.4514	0.880642	1.1025	10.4	1.2	347	0	0.16797	0.16797
2015-12-04 04:45:00		248.89	92.1791	0.4636	0.899308	1.1025	10	1.8	12	0	0	0.167969
2015-12-04 05:00:00		250.703	92.8721	0.4392	0.861976	1.134	9.8	0.84	15	0	0	0
2015-12-04 05:15:00		245.072	90.8563	0.366	0.74998	1.0836	9.9	1.02	246	0	0	0
2015-12-04 05:30:00		243.27	90.1872	0.4026	0.805978	1.1088	10.2	1.7	24	0	0	0
2015-12-04 05:45:00		248.077	92.0179	0.4758	0.917974	1.134	10.1	2.57	13	0	0.167981	0
2015-12-04 06:00:00		247.377	91.756	0.4148	0.824644	1.1214	9.9	1.92	14	0	0	0.167982
2015-12-04 06:15:00		248.49	92.1722	0.4514	0.880642	1.1277	10.1	2.19	4	0	0	0
2015-12-04 06:30:00		249.725	92.59	0.4514	0.880642	1.1151	10.1	2.79	9	0	0	0
2015-12-04 06:45:00		249.884	92.6177	0.4636	0.899308	1.1277	10.1	2.74	13	0	0	0
2015-12-04 07:00:00		249.554	92.4956	0.427	0.84331	1.1214	9.9	0.76	26	0	0	0.167983
2015-12-04 07:15:00		250.045	92.5872	0.4514	0.880642	1.1151	10.1	2.43	16	0	0	0
2015-12-04 07:30:00		248.549	91.9811	0.4514	0.880642	1.134	9.6	0.16	248	0	0	0
2015-12-04 07:45:00		246.091	91.1689	0.4026	0.805978	1.1088	9.7	2.65	19	0	0	0.335965
2015-12-04 08:00:00		247.622	91.5351	0.3904	0.787312	1.1088	9.6	2.28	29	16.4558	1.84781	0.67193
2015-12-04 08:15:00		252.005	92.887	0.366	0.74998	1.1277	9.6	0.36	12	39.4938	4.36754	2.01579
2015-12-04 08:30:00		258.998	95.3813	0.3538	0.731314	1.134	9.3	0.46	235	82.2788	9.40702	4.03158
2015-12-04 08:45:00		263.691	97.1761	0.3416	0.712648	1.134	9.6	0.72	273	115.193	14.6145	6.38333
2015-12-04 09:00:00		263.522	97.0734	0.305	0.65665	1.1277	10.1	1.57	16	115.191	19.8219	9.40702
2015-12-04 09:15:00		268.701	98.9717	0.366	0.74998	1.1466	9.5	1.57	290	184.305	26.5412	13.4386
2015-12-04 09:30:00		281.83	103.864	0.366	0.74998	1.134	9.6	1.59	280	236.963	33.9325	18.1421
2015-12-04 09:45:00		290.186	106.959	0.3782	0.768646	1.1277	9.7	1.18	280	381.774	45.6912	25.1974
2015-12-04 10:00:00		310.242	114.39	0.3904	0.787312	1.1466	9.9	1.52	287	444.306	51.9066	29.9009
2015-12-04 10:15:00		313.93	115.777	0.3782	0.768646	1.1088	10.3	0.86	251	490.382	60.4722	36.2833
2015-12-04 10:30:00		299.606	110.501	0.366	0.74998	1.1214	10.9	1.77	283	529.876	66.0109	40.9839
2015-12-04 10:45:00		325.138	119.88	0.3172	0.675316	1.1025	10.9	1.53	277	523.294	66.3425	42.8287
2015-12-04 11:00:00		317.025	116.587	0.3416	0.712648	1.1151	11.5	0.41	283	487.091	68.3488	45.8458
2015-12-04 11:15:00		339.174	124.736	0.3782	0.768646	1.1214	11.4	1.38	295	585.826	76.0709	52.0573
2015-12-04 11:30:00				0.3538	0.731314	1.1277	12.1	1.81	297	766.839	87.8164	59.7756
2015-12-04 11:45:00		330.477	122.165	0.3416	0.712648	1.0899	12.7	2.04	261	740.466	88.3164	61.4521
2015-12-04 12:00:00		339.397	125.382	0.4392	0.861976	1.1214	13.1	2	267	816.037	94.1914	65.8165
2015-12-04 12:15:00		310.08	114.524	0.3782	0.768646	1.0962	13.5	3.38	253	838.979	97.5488	68.5024
2015-12-04 12:30:00		344.286	127.024	0.3904	0.787312	1.1151	13.7	2.1	265	885.03	100.731	71.0152
2015-12-04 12:45:00		343.042	126.338	0.427	0.84331	1.1025	14	2.05	281	858.709	97.7016	68.8276
2015-12-04 13:00:00		325.23	119.717	0.427	0.84331	1.0521	14.4	2.68	241	815.894	96.02	67.8183
2015-12-04 13:15:00		318.8	117.617	0.3416	0.712648	1.0962	14.4	1.8	282	832.31	92.3254	64.4599
2015-12-04 13:30:00				0.366	0.74998	1.0899	14.8	2.86	244	930.975	97.5321	66.3084
2015-12-04 13:45:00		347.31	128.96	0.366	0.74998	1.1277	14.8	2.87	283	743.452	88.8031	61.2724
2015-12-04 14:00:00		346.373	128.958	0.366	0.74998	1.1151	15.4	1.5	210	825.726	87.9618	58.5852
2015-12-04 14:15:00		341.86	128.022	0.3904	0.787312	1.1277	15.6	1.07	253	779.639	80.9048	53.0413
2015-12-04 14:30:00		348.958	130.417	0.4026	0.805978	1.1403	15.7	0.95	271	647.978	70.6618	45.6532
2015-12-04 14:45:00		336.691	126.219	0.3538	0.731314	1.1025	14.9	2.66	139	338.768	61.7657	38.9393
2015-12-04 15:00:00				0.366	0.74998	1.1403	14.8	2.89	123	631.486	59.4105	33.9009
2015-12-04 15:15:00		344.578	128.286	0.3416	0.712648	1.0836	15	2.8	164	647.931	54.2094	30.2096
2015-12-04 15:30:00				0.4026	0.805978	1.0899	14.9	2.42	149	391.39	38.4354	21.4835
2015-12-04 15:45:00		345.518	128.665	0.3782	0.768646	1.0899	14.5	0.68	152	240.096	29.5399	15.777
2015-12-04 16:00:00		311.427	115.949	0.366	0.74998	1.1214	14.6	1	144	233.535	24.8405	12.4203
2015-12-04 16:15:00		322.934	120.446	0.3538	0.731314	1.0836	14.6	1.93	192	213.834	19.3031	9.06404
2015-12-04 16:30:00		311.134	115.734	0.3904	0.787312	1.1088	14.5	1.19	143	131.59	13.4294	5.70751
2015-12-04 16:45:00		286.226	106.029	0.427	0.84331	1.2222	14.3	1.23	145	65.7919	7.38626	3.35739
2015-12-04 17:00:00		267.145	99.3558	0.4514	0.880642	1.1655	14.2	0.44	102	26.3192	3.69309	1.67868
2015-12-04 17:15:00		249.334	93.1507	0.4758	0.917974	1.3293	13.7	0.57	119	6.5801	1.00721	0.335736
2015-12-04 17:30:00		246.271	91.7155	0.4148	0.824644	1.1277	13.5	0.32	89	0	0	0.16787
2015-12-04 17:45:00		244.813	90.7862	0.5124	0.973972	1.1403	13.6	0.58	157	0	0	0
2015-12-04 18:00:00		244.113	90.5072	0.549	1.02997	1.134	13.3	0.31	275	0	0	0
2015-12-04 18:15:00		246.569	91.6325	0.5734	1.0673	1.1403	12.9	0.56	304	0	0	0.167897
2015-12-04 18:30:00		240.26	89.4491	0.6222	1.14197	1.1718	12.7	2.1	314	0	0	0.167898
2015-12-04 18:45:00		250.904	93.1397	0.5978	1.10463	1.2159	12.6	3.46	304	0	0	0.167898
2015-12-04 19:00:00		257.706	95.2521	0.671	1.21663	1.1151	12.3	2.23	317	0	0	0
2015-12-04 19:15:00		253.371	93.3636	0.732	1.30996	1.1655	12.6	2.3	306	0	0	0
2015-12-04 19:30:00		254.039	93.4924	0.6344	1.16063	1.0836	11.9	2.63	326	0	0.167901	0.167901
2015-12-04 19:45:00		252.447	93.0099	0.6832	1.2353	1.1403	11.9	2.44	296	0	0	0
2015-12-04 20:00:00		256.276	94.445	0.6466	1.1793	1.1214	12.1	2.17	286	0	0	0
2015-12-04 20:15:00		253.007	93.006	0.6832	1.2353	1.1151	12.2	1.79	255	0	0	0
2015-12-04 20:30:00		254.219	93.7451	0.5734	1.0673	1.1277	12.5	1.82	268	0	0	0
2015-12-04 20:45:00		259.546	95.9061	0.5612	1.04864	1.1151	12.8	2.63	256	0	0	0.167926
2015-12-04 21:00:00		255.924	94.4181	0.6466	1.1793	1.1466	13.7	3.03	265	0	0	0.167926
2015-12-04 21:15:00		254.389	94.049	0.6954	1.25396	1.1214	13.8	2.87	263	0	0.167926	0.167926
2015-12-04 21:30:00		251.636	93.3237	0.488	0.93664	1.1088	13.9	3.45	272	0	0	0
2015-12-04 21:45:00		255.402	94.6911	0.427	0.84331	1.071	13.7	2.59	281	0	0	0
2015-12-04 22:00:00		256.141	94.6558	0.5734	1.0673	1.0836	14.1	2.39	268	0	0	0.167926
2015-12-04 22:15:00		259.062	95.8154	0.5124	0.973972	1.0647	14.2	2.52	276	0	0	0
2015-12-04 22:30:00		258.728	95.7533	0.5856	1.08597	1.0899	14.2	2.63	305	0	0	0
2015-12-04 22:45:00		254.591	94.0783	0.5856	1.08597	1.1088	14.3	2.4	264	0	0	0
2015-12-04 23:00:00		261.028	96.7824	0.4514	0.880642	1.0458	14.3	2.07	260	0	0	0
2015-12-04 23:15:00		261.895	97.1769	0.4514	0.880642	1.0647	13	4.65	261	0	0	0
2015-12-04 23:30:00		263.171	97.692	0.4636	0.899308	1.0899	13.4	4.66	274	0	0	0.167918
2015-12-04 23:45:00		263.044	97.6629	0.4514	0.880642	1.0584	12.8	3.68	272	0	0	0.16791
2015-12-05		261.355	97.0055	0.4514	0.880642	1.0899	12.2	1.58	2	0	0	0.167916
2015-12-05 00:15:00		260.414	96.5354	0.5612	1.04864	1.0962	12.2	0.67	186	0	0	0.167916
2015-12-05 00:30:00		254.812	94.4261	0.5368	1.0113	1.1151	12.5	0.92	121	0	0	0.167922
2015-12-05 00:45:00		252.948	93.7636	0.488	0.93664	1.0899	12.5	1.21	107	0	0	0.167926
2015-12-05 01:00:00		245.516	90.7814	0.5734	1.0673	1.0773	12.2	0.33	113	0	0	0.167926
2015-12-05 01:15:00		245.622	90.9445	0.5124	0.973972	1.0962	12.2	0.28	291	0	0	0.167926
2015-12-05 01:30:00		240.519	88.9961	0.549	1.02997	1.1088	11.6	0.87	20	0	0	0.167926
2015-12-05 01:45:00		240.464	89.0539	0.488	0.93664	1.1151	11.5	0.75	245	0	0.335852	0.167926
2015-12-05 02:00:00		242.659	89.9099	0.4758	0.917974	1.1592	11.4	0.22	235	0	0.335852	0
2015-12-05 02:15:00		248.968	92.0428	0.5734	1.0673	1.1151	11.5	0.41	290	0	0	0.167926
2015-12-05 02:30:00		248.273	91.8544	0.61	1.1233	1.1088	11.5	0.63	258	0	0	0.167926
2015-12-05 02:45:00		246.122	91.1206	0.5978	1.10463	1.1214	11.3	0.25	239	0	0	0
2015-12-05 03:00:00		243.782	90.2984	0.5246	0.992638	1.1025	11.4	0.7	300	0	0	0.16793
2015-12-05 03:15:00		241.758	89.5645	0.5002	0.955306	1.1466	11.3	0.65	222	0	0.335858	0.167929
2015-12-05 03:30:00		240.042	88.9463	0.4758	0.917974	1.1214	11.3	0.16	241	0	0	0.167931
2015-12-05 03:45:00		239.834	88.7701	0.549	1.02997	1.134	11.5	0.66	154	0	0.335871	0
2015-12-05 04:00:00		242.102	89.3127	0.5612	1.04864	1.1088	11.6	0.63	57	0	0	0
2015-12-05 04:15:00		240.763	88.5711	0.5002	0.955306	1.1025	11.1	1.48	1	0	0.33588	0
2015-12-05 04:30:00		241.609	88.5737	0.61	1.1233	1.0962	11	0.8	276	0	0	0.167942
2015-12-05 04:45:00		243.415	89.2546	0.6344	1.16063	1.0962	11	0.56	225	0	0	0.167944
2015-12-05 05:00:00		241.318	88.4713	0.7564	1.34729	1.0773	11.1	0.15	234	0	0	0.167945
2015-12-05 05:15:00		238.651	87.6674	0.732	1.30996	1.0962	11.1	0.76	337	0	0	0.16795
2015-12-05 05:30:00		237.099	87.1849	0.6466	1.1793	1.0962	11	0.63	233	0	0.335903	0.167952
2015-12-05 05:45:00		238.658	87.8474	0.6344	1.16063	1.1151	11	0.28	173	0	0	0.167954
2015-12-05 06:00:00		229.661	84.6424	0.5856	1.08597	1.0962	11.2	1.04	115	0	0.167953	0.167953
2015-12-05 06:15:00		237.267	87.4352	0.6344	1.16063	1.0836	11.2	2.23	349	0	0	0.167954
2015-12-05 06:30:00		234.291	86.3754	0.5856	1.08597	1.0647	10.8	0.98	277	0	0.167954	0.167954
2015-12-05 06:45:00		237.987	87.7568	0.549	1.02997	1.0962	10.8	0.95	282	0	0	0.167954
2015-12-05 07:00:00		236.877	87.3301	0.5612	1.04864	1.0899	10.8	0.37	219	0	0	0.167954
2015-12-05 07:15:00		227.48	84.0117	0.5124	0.973972	1.0899	10.7	0.28	236	0	0	0
2015-12-05 07:30:00		220.664	81.5758	0.5612	1.04864	1.1655	10.8	1.16	70	0	0	0.167954
2015-12-05 07:45:00		240.274	88.8343	0.5124	0.973972	1.0899	10.7	1.4	352	0	0	0.167957
2015-12-05 08:00:00		244.387	90.4354	0.4392	0.861976	1.0899	10	1.9	2	6.58231	1.34364	0.839773
2015-12-05 08:15:00		255.071	94.3127	0.427	0.84331	1.1214	9.9	1.33	286	19.7469	4.19886	1.67954
2015-12-05 08:30:00		259.968	96.1395	0.3904	0.787312	1.1088	9.9	0.53	298	36.2027	7.89399	3.5271
2015-12-05 08:45:00		259.54	96.0885	0.3904	0.787312	1.0836	10	1.33	268	32.9115	7.39021	3.52714
2015-12-05 09:00:00		264.024	97.5543	0.366	0.74998	1.0899	10.1	0.37	242	39.4938	10.2455	4.70286
2015-12-05 09:15:00		266.836	98.5625	0.3538	0.731314	1.0773	10.1	0.32	194	36.2027	14.4449	7.39041
2015-12-05 09:30:00		263.478	97.4383	0.3416	0.712648	1.0836	10.3	0.67	150	49.3673	14.1093	7.55856
2015-12-05 09:45:00		267.762	99.0433	0.3782	0.768646	1.0836	10.7	1.34	101	65.8231	19.4837	10.9176
2015-12-05 10:00:00		283.707	104.892	0.3904	0.787312	1.0647	11.1	1.01	119	108.608	23.851	13.7731
2015-12-05 10:15:00		291.577	107.839	0.4392	0.861976	1.1151	11.2	1.11	85	118.481	25.1943	15.1166
2015-12-05 10:30:00		295.305	109.278	0.3904	0.787312	1.1025	10.4	1.04	358	174.431	32.7517	20.3229
2015-12-05 10:45:00		339.552	125.644	0.3538	0.731314	1.0521	10.4	0.3	95	200.76	33.5911	21.1624
2015-12-05 11:00:00		316.522	116.998	0.366	0.74998	1.0899	11.2	2.09	77	240.254	40.1411	25.5291
2015-12-05 11:15:00		322.048	119.056	0.4758	0.917974	1.0836	11.4	2.13	85	266.583	43.8361	28.5523
2015-12-05 11:30:00		338.57	125.261	0.3904	0.787312	1.0899	11.5	2.32	62	292.913	47.1952	31.0716
2015-12-05 11:45:00		316.462	117.094	0.3904	0.787312	1.0647	11.6	2.57	91	332.406	48.7066	31.9112
2015-12-05 12:00:00		327.413	121.099	0.3904	0.787312	1.0395	11.7	3.68	84	579.243	81.114	53.0683
2015-12-05 12:15:00		308.094	113.804	0.488	0.93664	1.0773	11.9	2.95	116	523.293	85.475	58.1029
2015-12-05 12:30:00		313.348	115.579	0.4514	0.880642	1.071	12.5	3.39	90	707.598	92.6953	61.461
2015-12-05 12:45:00		324.144	118.917	0.3904	0.787312	1.0899	12.7	2.95	97	928.05	100.922	65.8259
2015-12-05 13:00:00		330.435	121.219	0.4392	0.861976	1.0647	12.8	4.29	109	789.872	94.5283	62.1234
2015-12-05 13:15:00		300.739	110.64	0.5612	1.04864	1.0836	12.8	4.19	106	309.31	67.16	47.3478
2015-12-05 13:30:00		311.953	114.956	0.5246	0.992638	1.0962	12.7	2.22	130	388.234	72.8678	49.6979
2015-12-05 13:45:00		328.49	121.447	0.3782	0.768646	1.071	12.7	2.74	106	674.465	82.6058	53.7274
2015-12-05 14:00:00		319.7	118.257	0.3782	0.768646	1.0773	12.8	4.48	108	296.106	58.0914	38.9515
2015-12-05 14:15:00		326.536	120.387	0.5124	0.973972	1.071	12.8	2.19	138	384.938	58.5929	36.9353
2015-12-05 14:30:00		325.705	119.97	0.488	0.93664	1.0584	12.7	4.04	94	371.778	57.9175	35.9256
2015-12-05 14:45:00		318.308	117.855	0.4148	0.824644	1.0773	12.8	3.23	112	259.916	40.7929	24.5093
2015-12-05 15:00:00		310.252	114.892	0.4026	0.805978	1.0584	12.8	3.18	108	213.855	32.9044	19.3062
2015-12-05 15:15:00		298.323	111.003	0.3904	0.787312	1.1151	12.6	3.08	101	161.214	25.5192	14.4385
2015-12-05 15:30:00		294.248	109.658	0.3904	0.787312	1.1403	12.6	3.49	97	220.435	29.7177	15.7823
2015-12-05 15:45:00		292.311	108.936	0.4514	0.880642	1.0647	12.6	4.11	99	101.992	15.6145	8.05909
2015-12-05 16:00:00		274.021	102.249	0.4514	0.880642	1.1718	12.7	3.03	113	88.8319	14.1034	6.71592
2015-12-05 16:15:00		268.195	100.622	0.3904	0.787312	1.2663	12.8	3.05	108	62.5125	10.5776	4.86904
2015-12-05 16:30:00		255.007	95.9097	0.366	0.74998	1.1718	12.8	2.91	117	32.9035	5.54063	2.85426
2015-12-05 16:45:00		252.609	94.8831	0.5002	0.955306	1.1403	12.7	2.74	116	23.0349	4.36538	2.01479
2015-12-05 17:00:00		247.067	93.0114	0.4636	0.899308	1.1403	12.6	3.77	106	13.1632	2.1827	1.0074
2015-12-05 17:15:00		242.182	91.3698	0.488	0.93664	1.1151	12.5	3.44	86	3.29101	0.67161	0.335805
2015-12-05 17:30:00		235.305	88.7536	0.5246	0.992638	1.1592	12.3	3.06	107	0	0.167898	0.167898
2015-12-05 17:45:00		234.482	88.5111	0.5856	1.08597	1.1025	12.3	2	97	0	0	0.167898
2015-12-05 18:00:00		235.588	88.8245	0.5002	0.955306	1.1151	12.3	1.87	100	0	0	0.167901
2015-12-05 18:15:00		238.066	89.537	0.5368	1.0113	1.1277	12.3	2.13	85	0	0	0.167905
2015-12-05 18:30:00		241.257	90.213	0.5124	0.973972	1.134	12.1	1.89	90	0	0	0.167913
2015-12-05 18:45:00		248.037	92.372	0.5368	1.0113	1.0962	12.1	1.76	75	0	0	0.167925
2015-12-05 19:00:00		250.569	93.4265	0.4636	0.899308	1.071	12.1	0.96	57	0	0	0.167923
2015-12-05 19:15:00		248.345	92.5011	0.488	0.93664	1.0395	12.2	0.94	51	0	0	0.167926
2015-12-05 19:30:00		250.58	93.1428	0.4636	0.899308	1.0269	12.3	2	74	0	0	0.167926
2015-12-05 19:45:00		249.583	92.3845	0.7564	1.34729	1.1151	12.3	3.42	63	0	0	0.167926
2015-12-05 20:00:00		254.471	94.5731	0.4758	0.917974	1.071	12.2	2.46	57	0	0	0.167926
2015-12-05 20:15:00		249.844	92.9043	0.5124	0.973972	1.0962	12.1	1.63	62	0	0	0
2015-12-05 20:30:00		247.931	92.1612	0.5856	1.08597	1.1403	12.1	2.28	72	0	0	0.167926
2015-12-05 20:45:00		249.065	92.5487	0.5124	0.973972	1.134	11.9	2.21	94	0	0	0.167926
2015-12-05 21:00:00		253.267	93.5039	0.6588	1.19796	1.1088	11.8	2.08	105	0	0	0.167926
2015-12-05 21:15:00		251.245	92.9237	0.6588	1.19796	1.1214	11.7	1.38	58	0	0	0.167926
2015-12-05 21:30:00		249.443	92.1771	0.7686	1.36596	1.1529	11.8	1.95	26	0	0.335852	0.167926
2015-12-05 21:45:00		250.078	92.1887		0.19		11.7	2.24	79	0	0.167926	0.167926
2015-12-05 22:00:00		247.634	91.8816	0.6222	1.14197	1.0836	11.7	1.72	76	0	0	0
2015-12-05 22:15:00		248.95	92.4343	0.5856	1.08597	1.1025	11.6	2.46	65	0	0	0
2015-12-05 22:30:00		249.006	92.3728	0.61	1.1233	1.1214	11.6	3.63	86	0	0	0.167926
2015-12-05 22:45:00		248.396	92.2312	0.5368	1.0113	1.0836	11.6	2.15	79	0	0	0.167926
2015-12-05 23:00:00		248.332	92.3701	0.5734	1.0673	1.0836	11.6	2.29	79	0	0	0
2015-12-05 23:15:00		248.133	92.3504	0.488	0.93664	1.071	11.5	2.45	88	0	0	0.167926
2015-12-05 23:30:00		249.553	93.0299	0.488	0.93664	1.071	11.6	1.25	94	0	0	0.167926
2015-12-05 23:45:00		248.848	92.8215	0.5002	0.955306	1.071	11.6	1.92	83	0	0	0.167926
2015-12-06		247.168	92.2413	0.5246	0.992638	1.0962	11.7	1.51	85	0	0	0.167928
2015-12-06 00:15:00		248.596	92.7677	0.5246	0.992638	1.0773	11.7	1.87	85	0	0	0
2015-12-06 00:30:00		246.792	92.2825	0.5124	0.973972	1.134	11.9	0.57	251	0	0.167926	0.167926
2015-12-06 00:45:00		250.874	93.0503	0.5368	1.0113	1.1151	11.9	0.44	184	0	0	0.167927
2015-12-06 01:00:00		252.855	93.6034	0.549	1.02997	1.1277	11.9	1.43	131	0	0.167926	0.167926
2015-12-06 01:15:00		252.881	93.615	0.5856	1.08597	1.0899	11.7	4.61	97	0	0.167927	0.167927
2015-12-06 01:30:00		252.536	93.4625	0.5978	1.10463	1.1025	11.9	1.11	16	0	0.167926	0.167926
2015-12-06 01:45:00		251.707	93.1835	0.5612	1.04864	1.0899	11.7	1.7	31	0	0	0.167926
2015-12-06 02:00:00		250.488	92.7347	0.5246	0.992638	1.0899	11.6	0.73	99	0	0.167926	0.167926
2015-12-06 02:15:00		249.818	92.4799	0.5734	1.0673	1.1088	11.8	2.13	66	0	0.167926	0.167926
2015-12-06 02:30:00		247.322	91.5203	0.549	1.02997	1.0773	11.7	2.29	95	0	0	0.167927
2015-12-06 02:45:00		251.078	92.8972	0.5978	1.10463	1.0836	11.7	1.83	117	3.29115	0.167929	0
2015-12-06 03:00:00		251.383	93.0062	0.5246	0.992638	1.0899	11.6	1.94	106	3.29115	0	0.167926
2015-12-06 03:15:00		252.521	93.3581	0.5002	0.955306	1.0899	11.5	2.35	115	3.29115	0.167926	0.167926
2015-12-06 03:30:00		250.733	92.6502	0.549	1.02997	1.071	11.6	1.26	111	3.29115	0	0.167926
2015-12-06 03:45:00		251.871	93.0777	0.488	0.93664	1.0962	11.7	1.84	111	0	0.167929	0
2015-12-06 04:00:00		249.497	92.0976	0.5124	0.973972	1.0836	11.8	0.14	269	0	0	0.167929
2015-12-06 04:15:00		250.788	92.5679	0.549	1.02997	1.0836	11.9	0.66	221	3.29115	0.167928	0.167928
2015-12-06 04:30:00		245.017	90.5256	0.5002	0.955306	1.1151	11.8	0.64	90	0	0.335858	0.167929
2015-12-06 04:45:00		249.278	92.0884	0.5612	1.04864	1.0899	11.8	0.89	12	3.29115	13.267	0
2015-12-06 05:00:00		242.283	89.772	0.488	0.93664	1.0458	11.9	0.79	28	3.29115	48.1953	0.167928
2015-12-06 05:15:00		240.66	89.1845	0.5246	0.992638	1.0836	11.8	1.5	68	0	108.986	0.167928
2015-12-06 05:30:00		247.51	91.6493	0.549	1.02997	1.1025	11.8	0.28	7	3.29115	205.379	0.167931
2015-12-06 05:45:00		243.58	90.1866	0.5612	1.04864	1.1088	11.7	1.38	106	3.29115	161.214	0
2015-12-06 06:00:00		238.092	88.6779	0.4514	0.880642	1.1403	11.6	0.32	24	3.29115	137.707	0
2015-12-06 06:15:00		232.975	86.9968	0.4514	0.880642	1.1088	11.7	0.7	62	0	74.2264	0.167933
2015-12-06 06:30:00		241.055	89.4223	0.488	0.93664	1.1088	11.6	0.12	241	3.29115	34.2581	0
2015-12-06 06:45:00		239.223	89.094	0.4514	0.880642	1.0962	11.9	1	314	3.29115	29.7236	0.16793
2015-12-06 07:00:00		236.431	87.9852	0.427	0.84331	1.0773	12	1.21	25	3.29115	271.882	0
2015-12-06 07:15:00		232.769	86.594	0.427	0.84331	1.0836	12	0.72	246	0	52.2264	0.167931
2015-12-06 07:30:00		235.594	87.605	0.4392	0.861976	1.0584	12	1.39	42	0	33.4179	0.167929
2015-12-06 07:45:00		231.381	86.1991	0.3904	0.787312	1.0584	11.8	1.36	68	0	36.9444	0.167929
2015-12-06 08:00:00		235.261	87.4774	0.3538	0.731314	1.1088	11.7	0.98	43	6.58231	30.7314	0.503794
2015-12-06 08:15:00		250.053	92.6444	0.3416	0.712648	1.071	11.8	0.78	32	23.0381	32.9142	1.51137
2015-12-06 08:30:00		255.99	94.8612	0.3172	0.675316	1.0584	11.9	0.57	66	62.5319	29.3875	3.02271
2015-12-06 08:45:00		277.966	102.851	0.366	0.74998	1.071	11.9	0.37	15	102.026	30.5628	4.36611
2015-12-06 09:00:00		269.808	99.5609	0.4026	0.805978	1.071	12	1	88	62.5319	24.3494	3.69439
2015-12-06 09:15:00		272.158	100.606	0.4148	0.824644	1.0836	12	0.24	110	95.4434	31.5701	5.20571
2015-12-06 09:30:00		297.834	110.128	0.3904	0.787312	1.0962	12	1.18	108	171.14	35.7688	11.755
2015-12-06 09:45:00		341.546	126.385	0.3904	0.787312	1.0962	12.1	1.74	71	253.419	45.508	18.8077
2015-12-06 10:00:00		324.209	120.152	0.4392	0.861976	1.1088	12.1	1.29	69	157.975	36.1041	15.2813
2015-12-06 10:15:00		333.419	123.207	0.5002	0.955306	1.071	12.1	2.18	87	210.634	42.4853	19.9832
2015-12-06 10:30:00		308.555	113.956	0.4758	0.917974	1.0773	12.1	3.08	77	309.362	57.5987	30.5626
2015-12-06 10:45:00		281.153	103.846	0.4392	0.861976	1.0584	12.1	4.88	87	164.557	30.8982	13.434
2015-12-06 11:00:00		286.915	105.951	0.4392	0.861976	1.0836	12.2	2.42	89	194.167	29.7224	13.098
2015-12-06 11:15:00		314.888	116.161	0.5124	0.973972	1.0836	12.4	3.76	90	256.708	62.2979	38.4534
2015-12-06 11:30:00		297.412	109.756	0.488	0.93664	1.071	12.5	4.31	89	144.806	35.5974	18.6383
2015-12-06 11:45:00		290.025	107.104	0.488	0.93664	1.0332	12.6	3.85	84	187.591	40.4669	22.1644
2015-12-06 12:00:00		308.941	114.116	0.5124	0.973972	1.1025	13.2	2.43	108	279.747	52.0498	31.7336
2015-12-06 12:15:00		299.619	110.6	0.5246	0.992638	1.0269	13.5	1.43	135	217.216	41.9751	25.6888
2015-12-06 12:30:00		321.008	118.492	0.4758	0.917974	1.071	14.1	2.33	115	134.937	26.1922	14.7751
2015-12-06 12:45:00		311.596	114.936	0.4026	0.805978	1.0395	14.1	3.06	143	375.192	53.2238	33.2439
2015-12-06 13:00:00				0.5368	1.0113	1.0647	15	1.86	142	529.876	84.6206	55.7421
2015-12-06 13:15:00				0.4636	0.899308	1.0647	14.9	1.91	95	960.944	99.2305	63.2993
2015-12-06 13:30:00		339.882	125.236	0.4026	0.805978	1.0521	14.9	2.03	158	371.851	79.9203	54.7353
2015-12-06 13:45:00		345.148	127.237	0.5978	1.10463	1.0899	15	1.82	134	1046.29	92.5119	57.757
2015-12-06 14:00:00		336.746	124.117	0.5246	0.992638	1.1088	15	2.08	116	437.581	75.2183	48.3546
2015-12-06 14:15:00		315.823	116.488	0.5002	0.955306	1.071	14.9	2.01	136	243.465	53.0552	32.5719
2015-12-06 14:30:00		312.742	115.361	0.5734	1.0673	1.0773	14.9	1.13	122	296.106	47.6804	27.5338
2015-12-06 14:45:00		326.084	120.335	0.549	1.02997	1.1088	14.9	2.67	175	240.175	40.6267	22.16
2015-12-06 15:00:00		321.746	118.978	0.488	0.93664	1.0773	14.9	1.65	137	217.145	35.5892	18.1304
2015-12-06 15:15:00		328.068	121.457	0.4758	0.917974	1.0647	14.8	3.69	125	194.114	34.5833	17.4595
2015-12-06 15:30:00		330.728	122.531	0.5612	1.04864	1.1214	14.7	3.15	164	190.824	37.1033	18.4677
2015-12-06 15:45:00		308.018	114.119	0.4758	0.917974	1.0521	14.8	1.81	150	138.183	27.1986	11.9204
2015-12-06 16:00:00		296.998	110.111	0.4392	0.861976	1.1214	14.7	1.57	148	111.862	23.8414	9.40225
2015-12-06 16:15:00		292.472	108.38	0.4026	0.805978	1.071	14.7	3.04	119	82.2518	19.9798	7.05171
2015-12-06 16:30:00		275.339	102.562	0.4392	0.861976	1.0647	14.7	2.21	108	55.9312	15.4466	4.70114
2015-12-06 16:45:00		258.532	97.2196	0.4636	0.899308	1.1214	14.7	3.01	149	23.0305	8.3949	1.67898
2015-12-06 17:00:00		246.903	93.1579	0.4148	0.824644	1.1403	14.6	0.98	179	13.1603	6.54802	1.17528
2015-12-06 17:15:00		242.443	91.3907	0.4636	0.899308	1.0899	14.5	0.79	188	3.2901	4.02955	0.335796
2015-12-06 17:30:00		236.57	89.2196	0.5246	0.992638	1.0899	14.6	2.44	163	0	3.69375	0.167898
2015-12-06 17:45:00		235.929	89.0382	0.5368	1.0113	1.1088	14.6	0.93	176	0	3.35796	0
2015-12-06 18:00:00		238.298	89.8364	0.5246	0.992638	1.0836	14.6	0.77	97	0	3.02216	0
2015-12-06 18:15:00		235.919	88.8491	0.5124	0.973972	1.1151	14.5	1.72	150	0	3.02216	0.167898
2015-12-06 18:30:00		236.661	88.924	0.5856	1.08597	1.0647	14.5	1.47	177	0	3.02221	0
2015-12-06 18:45:00		238.197	89.3241	0.549	1.02997	1.0584	14.5	1.58	101	0	2.68639	0.167899
2015-12-06 19:00:00		238.235	89.2078	0.5002	0.955306	1.0521	14.4	2.72	144	0	2.3506	0.1679
2015-12-06 19:15:00		238.631	89.242	0.5124	0.973972	1.0395	14.5	2.59	166	0	2.35063	0
2015-12-06 19:30:00		242.075	90.2627	0.5368	1.0113	1.0584	14.5	2.16	149	0	2.01478	0
2015-12-06 19:45:00		245.973	91.0794	0.5978	1.10463	1.0647	14.4	3.88	106	3.29082	1.8469	0
2015-12-06 20:00:00		250.842	92.2934	0.671	1.21663	1.0521	14.4	1.62	153	0	2.01483	0.167902
2015-12-06 20:15:00		249.568	91.6093	0.7076	1.27263	1.0647	14.4	2.21	137	0	1.67903	0.167903
2015-12-06 20:30:00		253.32	92.7879	0.732	1.30996	1.008	14.3	2.23	113	0	1.84693	0.335805
2015-12-06 20:45:00		253.401	92.7194	0.7198	1.29129	1.0647	14.3	2.53	115	0	2.01483	0
2015-12-06 21:00:00		253.963	92.8916	0.671	1.21663	1.0521	14.2	1.75	184	0	2.35063	0
2015-12-06 21:15:00		256.5	93.8435	0.6344	1.16063	1.0962	14.2	1.78	138	0	2.51852	0
2015-12-06 21:30:00		256.564	94.0835	0.6588	1.19796	1.0458	14.2	3.88	121	3.29092	2.85432	0
2015-12-06 21:45:00		255.485	93.6787	0.671	1.21663	1.1214	14.2	1.86	134	0	3.02222	0.167901
2015-12-06 22:00:00		256.497	94.066	0.7076	1.27263	1.0332	14.1	1.94	122	0	2.51851	0.167901
2015-12-06 22:15:00		256.619	94.3306	0.6344	1.16063	1.0584	12.7	3.25	71	0	2.35059	0.167899
2015-12-06 22:30:00		255.762	94.2418	0.5612	1.04864	1.1088	12.6	3.54	75	0	2.0148	0.1679
2015-12-06 22:45:00		254.661	93.8609	0.549	1.02997	1.0458	12.4	3.9	80	0	1.51108	0
2015-12-06 23:00:00		249.182	92.3386	0.5734	1.0673	1.0773	12.2	3.3	91	0	1.51108	0.167898
2015-12-06 23:15:00		252.082	93.772	0.5368	1.0113	1.0647	12.1	3.44	87	0	1.67901	0.335802
2015-12-06 23:30:00		250.821	93.2038	0.549	1.02997	1.0773	12.1	2.84	97	0	1.34324	0.167906
2015-12-06 23:45:00		251.663	93.7364	0.5002	0.955306	1.071	12	2.83	97	0	1.67915	0.167915
2015-12-07		250.697	93.5224	0.4636	0.899308	1.0332	11.8	1.95	97	0	1.17546	0.167924
2015-12-07 00:15:00		249.35	93.0381	0.4514	0.880642	1.0521	11.9	0.96	98	0	1.34341	0.167926
2015-12-07 00:30:00		248.685	92.8364	0.4758	0.917974	1.0458	12.1	0.96	96	3.29115	1.00756	0.167926
2015-12-07 00:45:00		248.521	92.8911	0.4392	0.861976	1.0458	12	1.88	78	0	1.17548	0
2015-12-07 01:00:00		248.32	92.8484	0.5124	0.973972	1.0458	11.9	3.12	88	0	1.17548	0.167926
2015-12-07 01:15:00		246.977	92.3896	0.4514	0.880642	1.0584	12	2.85	103	0	0.83963	0
2015-12-07 01:30:00		248.761	93.0117	0.488	0.93664	1.0584	12	2.06	108	0	0.671704	0.167926
2015-12-07 01:45:00		247.635	92.0478	0.5978	1.10463	1.0458	12.1	4.37	96	0	1.17548	0.167926
2015-12-07 02:00:00		250.623	92.6438	0.6344	1.16063	1.1403	12	3.41	97	0	1.17548	0.167926
2015-12-07 02:15:00		252.251	93.1014	0.5612	1.04864	1.0584	11.8	2.59	82	0	0.83963	0.167926
2015-12-07 02:30:00		251.285	92.842	0.549	1.02997	1.0458	11.8	3.53	79	0	0.83963	0.167926
2015-12-07 02:45:00		250.618	92.6849	0.5002	0.955306	1.0458	11.7	3.44	78	0	1.17549	0.167928
2015-12-07 03:00:00		252.079	92.9715	0.5124	0.973972	1.0332	11.6	4	81	0	0.839632	0.167926
2015-12-07 03:15:00		252.187	93.2162	0.488	0.93664	1.0521	11.6	3.7	79	0	0.839644	0.167929
2015-12-07 03:30:00		247.468	91.5	0.4636	0.899308	1.0206	11.5	2.9	99	0	1.34342	0.167928
2015-12-07 03:45:00		251.838	92.691	0.4758	0.917974	1.0395	11.4	1.73	122	0	1.17551	0.16793
2015-12-07 04:00:00		249.692	92.0123	0.4514	0.880642	1.0269	11.3	2.41	91	0	1.34342	0
2015-12-07 04:15:00		248.237	91.5189	0.427	0.84331	1.0395	11.3	1.21	125	0	1.34344	0.16793
2015-12-07 04:30:00		248.495	91.6139	0.427	0.84331	1.0521	11.6	0.75	150	0	1.51142	0.167935
2015-12-07 04:45:00		249.437	91.757	0.4758	0.917974	1.0395	11.5	0.28	247	0	1.67939	0.167939
2015-12-07 05:00:00		250.205	92.2813	0.4514	0.880642	1.0395	11.6	0.1	149	0	2.01541	0.167951
2015-12-07 05:15:00		249.577	92.1356	0.427	0.84331	1.0332	11.8	0.12	305	0	3.86293	0.335907
2015-12-07 05:30:00		248.331	91.4974	0.4392	0.861976	1.0521	11.9	0.76	215	0	7.38997	0.167954
2015-12-07 05:45:00		242.745	89.7759	0.5002	0.955306	1.0584	11.7	0.59	262	0	32.583	0.167954
2015-12-07 06:00:00		238.852	87.9794	0.5124	0.973972	1.0521	11.9	0.49	250	0	25.1931	0
2015-12-07 06:15:00		240.002	89.0366	0.488	0.93664	1.1088	11.8	1.05	238	0	22.8418	0.167954
2015-12-07 06:30:00		234.772	87.5251	0.3904	0.787312	1.0458	13.3	0.8	129	0	23.6815	0.167954
2015-12-07 06:45:00		228.572	85.2555	0.4514	0.880642	1.0773	13.9	2.47	144	0	19.9861	0.167951
2015-12-07 07:00:00		227.656	85.3029	0.3782	0.768646	1.0395	14.2	1.33	154	0	19.4811	0.16794
2015-12-07 07:15:00		228.524	85.5282	0.4026	0.805978	1.0332	14.2	1.02	113	0	15.1135	0.335856
2015-12-07 07:30:00		226.956	85.1038	0.4514	0.880642	1.0395	14.3	3.53	98	0	17.2964	0.167926
2015-12-07 07:45:00		236.575	88.0084	0.4392	0.861976	1.0332	14.5	1.2	112	0	16.7926	0.167926
2015-12-07 08:00:00		240.258	89.2279	0.4636	0.899308	1.0458	14.5	1.18	130	0	16.1209	0.335852
2015-12-07 08:15:00		244.648	90.7145	0.4026	0.805978	1.0458	14.7	1.96	172	13.1646	17.8	1.00755
2015-12-07 08:30:00		253.273	93.8479	0.427	0.84331	1.0836	14.7	1.51	162	26.3288	20.4864	2.3509
2015-12-07 08:45:00		261.98	96.9493	0.4148	0.824644	1.0521	14.7	1.57	148	62.5318	20.3173	2.35076
2015-12-07 09:00:00		261.925	96.9517	0.4148	0.824644	1.0899	14.7	2.22	147	75.6965	20.3159	2.1827
2015-12-07 09:15:00		262.825	97.2738	0.4392	0.861976	1.0269	14.7	1.78	135	55.9496	30.2217	5.37274
2015-12-07 09:30:00		266.583	98.4426	0.3904	0.787312	1.0521	14.7	0.64	164	102.021	35.0907	8.7307
2015-12-07 09:45:00		259.61	95.6911	0.4148	0.824644	1.0332	12.7	4.06	99	32.911	27.3674	5.03695
2015-12-07 10:00:00		253.158	93.4411	0.4392	0.861976	1.0584	12.6	0.88	133	19.7459	22.4985	1.67899
2015-12-07 10:15:00		262.939	97.0048	0.427	0.84331	1.0521	13.5	2.48	105	69.1113	36.6018	7.72331
2015-12-07 10:30:00		261.188	96.3224	0.4026	0.805978	1.071	12.2	3.46	76	36.2021	32.908	4.86904
2015-12-07 10:45:00		260.317	96.0523	0.3294	0.693982	1.071	12.3	2.83	90	62.5309	31.9012	7.89135
2015-12-07 11:00:00		258.047	95.25	0.3172	0.675316	1.0458	12.2	3.34	91	62.53	36.435	7.21984
2015-12-07 11:15:00		257.693	95.1448	0.3172	0.675316	1.0962	12.4	3.33	97	128.354	50.876	17.7982
2015-12-07 11:30:00		294.623	108.827	0.488	0.93664	1.0647	12.3	2.95	85	319.242	82.4467	39.964
2015-12-07 11:45:00		275.912	101.931	0.366	0.74998	1.0521	12.4	2.94	98	115.189	41.9806	13.9376
2015-12-07 12:00:00		292.088	107.832	0.3904	0.787312	1.0395	12.5	2.84	102	332.39	82.9534	43.8276
2015-12-07 12:15:00		295.632	109.51	0.5246	0.992638	1.071	12.4	2.18	87	279.745	77.2448	40.1337
2015-12-07 12:30:00		290.688	107.878	0.427	0.84331	1.3104	12.6	1.66	87	233.672	64.8194	31.4021
2015-12-07 12:45:00		312.651	116.145	0.3416	0.712648	1.0269	12.9	3.84	92	319.242	75.3953	38.6212
2015-12-07 13:00:00		336.132	125.086	0.3416	0.712648	1.0143	13.3	3.89	96	450.888	93.5291	51.7181
2015-12-07 13:15:00		312.676	116.329	0.4758	0.917974	1.071	13.5	4.24	90	345.569	87.1429	48.3568
2015-12-07 13:30:00		311.012	115.778	0.4758	0.917974	1.0521	13.7	3.6	93	417.959	88.484	47.684
2015-12-07 13:45:00		321.532	119.646	0.4392	0.861976	1.0395	13.9	3.86	88	483.792	88.6505	47.6832
2015-12-07 14:00:00		289.063	107.686	0.4392	0.861976	1.1025	14.2	2.87	100	233.672	56.078	25.8563
2015-12-07 14:15:00		296.533	110.446	0.4636	0.899308	1.0647	14.6	1.99	100	306.044	67.8344	32.2381
2015-12-07 14:30:00		308.058	114.312	0.3782	0.768646	1.071	14.9	2.9	124	273.126	69.5107	34.5874
2015-12-07 14:45:00		317.378	117.774	0.3904	0.787312	1.1277	14.8	2.03	123	240.199	55.2388	23.6738
2015-12-07 15:00:00		306.174	113.659	0.427	0.84331	1.1655	14.9	2.98	141	154.642	40.7992	12.7602
2015-12-07 15:15:00				0.4392	0.861976	1.2348	15.1	2.01	165	529.708	71.6924	29.55
2015-12-07 15:30:00		345.282	127.57	0.488	0.93664	1.0647	14.8	2.6	148	174.374	44.9967	15.7824
2015-12-07 15:45:00		294.034	108.221	0.427	0.84331	1.071	14.7	3.44	149	95.4121	38.6165	11.0813
2015-12-07 16:00:00		321.643	118.506	0.5368	1.0113	1.0458	15	2.19	161	305.977	42.814	13.096
2015-12-07 16:15:00		305.301	112.364	0.4514	0.880642	1.071	14.9	4.29	155	154.633	35.0907	9.40229
2015-12-07 16:30:00		307.32	113.302	0.5002	0.955306	1.0647	14.9	2.99	137	88.8319	26.8637	5.87643
2015-12-07 16:45:00		272.015	101	0.3538	0.731314	1.0773	14.6	2.33	160	16.4504	20.4836	3.69376
2015-12-07 17:00:00		257.115	95.8929	0.4636	0.899308	1.1088	14.5	3.44	165	0	15.7823	1.67896
2015-12-07 17:15:00		245.463	91.6564	0.4758	0.917974	1.1214	14.5	3.56	166	0	12.5922	0.503688
2015-12-07 17:30:00		240.031	90.091	0.3782	0.768646	1.1151	14.6	2.07	131	0	11.0813	0.335796
2015-12-07 17:45:00		240.709	90.1806	0.5368	1.0113	1.0962	14.5	2.46	150	0	9.73808	0
2015-12-07 18:00:00		236.467	88.8341	0.5002	0.955306	1.1277	14.5	0.52	162	0	9.23438	0.167898
2015-12-07 18:15:00		234.812	88.1446	0.5124	0.973972	1.134	14.5	3.08	152	0	9.23438	0
2015-12-07 18:30:00		235.368	88.3789	0.5124	0.973972	1.1781	14.6	3.95	156	0	9.40244	0.167901
2015-12-07 18:45:00		235.996	88.4058	0.5734	1.0673	1.071	14.6	1.98	144	0	8.56283	0.167899
2015-12-07 19:00:00		239.228	89.459	0.5734	1.0673	1.1592	14.7	5.06	151	0	8.22728	0
2015-12-07 19:15:00		239.471	89.508	0.5734	1.0673	1.0836	14.7	3.47	171	0	8.22726	0.167903
2015-12-07 19:30:00		241.114	89.6764	0.5734	1.0673	1.0962	14.6	3.86	123	0	7.21975	0.167901
2015-12-07 19:45:00		239.32	89.3002	0.549	1.02997	1.1025	14.6	1.38	149	0	7.55544	0.167899
2015-12-07 20:00:00		243.42	90.8887	0.5246	0.992638	1.071	14.6	1.88	115	13.1628	6.04455	0.167904
2015-12-07 20:15:00		245.631	91.6293	0.5368	1.0113	1.1025	14.7	2.58	153	19.7443	6.38043	0.167906
2015-12-07 20:30:00		248.607	92.6541	0.4758	0.917974	1.386	14.7	1.69	137	26.3251	6.71622	0.167906
2015-12-07 20:45:00		248.98	92.5345	0.5002	0.955306	1.0647	14.6	1.9	132	26.3256	5.37279	0.1679
2015-12-07 21:00:00		246.714	91.4357	0.5612	1.04864	1.0647	14.6	0.78	179	26.3253	5.37282	0
2015-12-07 21:15:00		242.778	89.6672	0.6588	1.19796	1.071	14.6	2.9	154	26.3257	5.54072	0
2015-12-07 21:30:00		247.176	91.2888	0.5734	1.0673	1.0836	14.6	2.74	153	26.3264	4.86921	0.335808
2015-12-07 21:45:00		248.436	91.5337	0.6222	1.14197	1.071	14.7	2.44	152	26.3274	4.53341	0.335808
2015-12-07 22:00:00		248.89	91.6152	0.6588	1.19796	1.0962	14.7	2.44	170	32.9071	4.5333	0
2015-12-07 22:15:00		248.154	91.2201	0.6588	1.19796	1.1025	14.7	2.72	165	26.3266	4.19749	0.1679
2015-12-07 22:30:00		248.926	91.524	0.6222	1.14197	1.0521	14.7	2.08	176	32.9066	4.02973	0.167905
2015-12-07 22:45:00		248.115	91.226	0.5978	1.10463	1.0647	14.6	3.07	143	26.3256	3.86172	0.167901
2015-12-07 23:00:00		247.768	91.0936	0.671	1.21663	1.1088	14.6	2.48	130	29.6159	3.526	0.167905
2015-12-07 23:15:00		247.01	90.8149	0.6588	1.19796	1.0773	14.6	2.24	148	26.3255	3.35802	0.335802
2015-12-07 23:30:00		248.692	91.4405	0.6222	1.14197	1.1277	14.7	3.03	183	26.3263	3.0222	0
2015-12-07 23:45:00		248.784	91.5192	0.61	1.1233	1.0584	14.7	2.49	140	26.3251	3.02231	0.335813
2015-12-08		248.755	91.5064	0.5978	1.10463	1.0773	14.7	6.08	158	26.3275	2.8543	0.3358
2015-12-08 00:15:00		249.132	91.6963	0.5978	1.10463	1.0395	14.6	2.49	146	26.3255	3.02222	0
2015-12-08 00:30:00		248.882	91.5701	0.61	1.1233	1.071	14.8	1.61	159	26.3253	2.68645	0
2015-12-08 00:45:00		248.856	91.7098	0.6344	1.16063	1.0773	14.6	1.73	162	26.325	2.85439	0
2015-12-08 01:00:00		248.098	91.6126	0.6344	1.16063	1.0773	14.5	3.22	160	26.3256	2.85433	0.167902
2015-12-08 01:15:00		247.48	91.2872	0.6832	1.2353	1.0836	14.5	2.19	148	26.3251	2.68638	0.335798
2015-12-08 01:30:00		246.134	90.9072	0.61	1.1233	1.0521	14.5	1.46	145	19.7445	2.68641	0.335802
2015-12-08 01:45:00		245.482	90.6963	0.6466	1.1793	1.071	14.5	3.93	138	26.3256	2.5186	0.335813
2015-12-08 02:00:00		244.285	90.2995	0.6344	1.16063	1.0647	14.6	2.45	115	23.035	2.35065	0.335807
2015-12-08 02:15:00		245.08	90.4932	0.61	1.1233	1.0836	14.7	1.97	150	26.3262	2.18269	0.335799
2015-12-08 02:30:00		244.886	90.3838	0.5978	1.10463	1.0521	14.7	2.13	157	26.3259	2.01481	0.335802
2015-12-08 02:45:00		244.961	90.2452	0.6588	1.19796	1.0899	14.6	1.27	153	26.3257	2.01486	0.167905
2015-12-08 03:00:00		245.899	90.4553	0.7076	1.27263	1.1403	14.5	1.58	145	19.7438	2.01482	0
2015-12-08 03:15:00		245.558	90.2252	0.732	1.30996	1.0395	14.4	1.78	103	26.3255	2.85432	0.167901
2015-12-08 03:30:00		245.095	89.8524	0.5368	1.0113	1.0395	14.4	2.86	138	19.7446	4.02966	0.335805
2015-12-08 03:45:00		245.905	89.9412	0.427	0.84331	1.0836	14.2	1.62	127	26.3256	4.70127	0.167902
2015-12-08 04:00:00		245.454	89.7726	0.4148	0.824644	1.0458	14.4	2.75	107	19.7452	5.37301	0.167906
2015-12-08 04:15:00		245.604	89.7628	0.4636	0.899308	1.0332	14.4	1.99	141	26.3275	6.54808	0
2015-12-08 04:30:00		245.924	89.8767	0.4392	0.861976	1.008	14.2	1.6	184	26.328	7.05187	0.335803
2015-12-08 04:45:00		246.979	90.3006	0.4636	0.899308	1.0017	14.3	2.09	99	29.6199	6.88394	0.335802
2015-12-08 05:00:00		247.277	90.4295	0.4392	0.861976	1.0521	14.4	2.47	145	26.3292	5.37275	0
2015-12-08 05:15:00		248.15	90.7786	0.488	0.93664	1.0017	14.5	1.45	100	26.3286	4.36554	0.335811
2015-12-08 05:30:00		246.608	90.2321	0.5002	0.955306	1.0332	14.6	4.7	150	26.3283	4.19755	0.167902
2015-12-08 05:45:00		246.044	90.0447	0.5002	0.955306	1.0143	14.6	2.64	135	26.3269	4.02961	0.167901
2015-12-08 06:00:00		240.266	88.3554	0.4392	0.861976	1.1025	14.6	2.77	145	26.3274	4.02963	0.167902
2015-12-08 06:15:00		236.049	87.9735	0.366	0.74998	1.2096	14.6	1.89	125	26.3286	3.69387	0.167903
2015-12-08 06:30:00		234.657	88.0884	0.3172	0.675316	1.197	14.5	1.3	180	26.3266	3.35805	0
2015-12-08 06:45:00		235.499	87.9509	0.3904	0.787312	1.0773	14.4	2.44	158	19.7452	3.35805	0
2015-12-08 07:00:00		234.268	88.0133	0.3416	0.712648	1.2033	14.5	1.26	197	26.3281	3.02224	0.167902
2015-12-08 07:15:00		231.985	87.3504	0.3416	0.712648	1.2159	14.6	3.68	135	26.3269	3.52591	0.167901
2015-12-08 07:30:00		232.858	87.2003	0.4026	0.805978	1.197	14.6	4.19	139	26.3266	3.02217	0.167899
2015-12-08 07:45:00		232.765	86.9598	0.3904	0.787312	1.2663	14.7	4.11	141	26.327	3.02226	0.335807
2015-12-08 08:00:00		236.95	88.5896	0.5124	0.973972	1.1277	14.7	3.91	169	32.9075	3.69385	0.335805
2015-12-08 08:15:00		239.989	89.8572	0.3904	0.787312	1.1214	14.6	4.06	157	36.2002	5.70864	1.51111
2015-12-08 08:30:00		246.042	91.2369	0.3904	0.787312	1.0773	14.6	2.51	158	42.7834	6.04461	1.84696
2015-12-08 08:45:00		247.825	92.5706	0.4514	0.880642	1.1655	14.7	2.71	167	55.9438	8.05936	2.85436
2015-12-08 09:00:00		259.969	97.1196	0.3294	0.693982	1.1718	14.8	3.06	150	75.6908	11.5856	4.3656
2015-12-08 09:15:00		263.726	99.2456	0.3294	0.693982	1.1655	14.8	2.52	138	108.601	14.4396	6.04446
2015-12-08 09:30:00		270.472	101.5	0.2928	0.637984	1.1277	14.8	2.77	153	115.174	18.3012	8.56293
2015-12-08 09:45:00		279.564	104.777	0.2684	0.600652	1.1655	14.9	2.41	136	134.916	20.484	10.0741
2015-12-08 10:00:00		273.813	101.982	0.244	0.56332	1.0773	14.9	2.19	154	154.661	23.8418	12.7604
2015-12-08 10:15:00		303.734	113.25	0.2928	0.637984	1.1277	15	2.57	154	220.471	33.9163	19.1409
2015-12-08 10:30:00		316.268	117.694	0.2562	0.581986	1.0584	14.9	3.01	147	187.565	38.617	24.0097
2015-12-08 10:45:00		317.258	117.173	0.2928	0.637984	1.0647	15	2.69	174	345.51	50.8735	31.9009
2015-12-08 11:00:00		331.795	122.403	0.3294	0.693982	1.1088	15.1	2.55	152	365.252	57.589	36.9376
2015-12-08 11:15:00				0.3904	0.787312	1.0269	15.2	5.07	155	496.86	78.4084	52.0484
2015-12-08 11:30:00				0.3538	0.731314	1.1151	15.3	1.72	162	542.894	63.8012	40.6313
2015-12-08 11:45:00				0.4148	0.824644	1.0584	15.4	2.9	153	569.186	76.5615	51.041
2015-12-08 12:00:00				0.366	0.74998	1.0395	15.3	3.83	167	411.259	54.7347	36.266
2015-12-08 12:15:00				0.427	0.84331	1.071	15.3	3.03	112	437.579	70.5172	49.362
2015-12-08 12:30:00		338.721	124.769	0.3904	0.787312	1.0332	15.2	2.91	159	240.175	47.8509	33.9154
2015-12-08 12:45:00		334.993	123.474	0.4148	0.824644	1.071	15.1	4.57	153	227.015	38.7844	26.5279
2015-12-08 13:00:00		332.672	122.745	0.4026	0.805978	1.0332	15.1	1.1	186	233.595	34.083	21.8266
2015-12-08 13:15:00		328.427	121.309	0.4148	0.824644	1.1466	15	2.96	141	220.435	33.747	21.6585
2015-12-08 13:30:00		341.451	126.636	0.427	0.84331	1.0584	15	3.58	143	286.236	52.0483	34.9227
2015-12-08 13:45:00				0.427	0.84331	1.071	15.1	2.53	152	266.496	46.8435	30.8932
2015-12-08 14:00:00		347.586	128.874	0.3904	0.787312	1.0962	15.2	1.99	143	279.656	49.1941	32.2364
2015-12-08 14:15:00		319.218	118.326	0.427	0.84331	1.0962	15.1	5	138	246.755	47.1793	30.5574
2015-12-08 14:30:00		317.282	117.63	0.4148	0.824644	1.1403	15.1	3.01	143	305.977	41.6387	24.8489
2015-12-08 14:45:00		323.287	119.997	0.4392	0.861976	1.0899	15.1	2.93	135	279.656	44.8287	26.8637
2015-12-08 15:00:00		329.976	122.572	0.4026	0.805978	1.0836	15.1	2.45	167	266.496	37.1054	20.4836
2015-12-08 15:15:00		329.202	122.257	0.4636	0.899308	1.1466	15	1.83	189	184.244	37.2733	20.8193
2015-12-08 15:30:00		301.645	112.103	0.4026	0.805978	1.0647	15.1	1.37	147	108.572	20.8193	10.0739
2015-12-08 15:45:00		296.976	110.474	0.4392	0.861976	1.8459	15	2.35	130	62.5114	20.4836	9.73808
2015-12-08 16:00:00		267.638	99.5287	0.427	0.84331	1.6884	14.9	1.99	173	19.7404	10.7455	4.36535
2015-12-08 16:15:00		267.842	99.6437	0.4636	0.899308	3.3957	14.9	1.48	148	32.9007	14.775	6.04432
2015-12-08 16:30:00		262.114	97.3563	0.4148	0.824644	4.473	14.9	3.88	142	19.7404	9.57018	3.69375
2015-12-08 16:45:00		257.291	95.3521	0.427	0.84331	2.9673	14.7	1.24	112	6.58014	4.86904	1.67898
2015-12-08 17:00:00		248.773	91.9518	0.427	0.84331	2.4507	14.8	2.63	100	0	3.19006	0.335796
2015-12-08 17:15:00		245.823	90.8729	0.4026	0.805978	1.7955	14.6	2.73	108	0	2.35057	0.335796
2015-12-08 17:30:00		242.936	89.836	0.488	0.93664	1.1907	14.5	2.36	124	0	2.18267	0.335796
2015-12-08 17:45:00		241.551	89.5277	0.4636	0.899308	1.1529	14.7	1.82	113	0	2.18267	0.167898
2015-12-08 18:00:00		238.717	88.3121	0.5002	0.955306	1.1277	14.7	1.71	140	0	2.18267	0.167898
2015-12-08 18:15:00		234.134	86.917	0.488	0.93664	1.6569	14.6	1.35	80	0	2.35057	0.335796
2015-12-08 18:30:00		232.746	86.5333	0.4758	0.917974	2.1231	14.3	1.6	70	0	2.01478	0.335796
2015-12-08 18:45:00		237.002	88.3267	0.5124	0.973972	1.6443	14.6	1.56	100	0	2.01481	0.335801
2015-12-08 19:00:00		242.157	90.1995	0.488	0.93664	1.5687	13.9	1.48	100	0	2.01478	0.167898
2015-12-08 19:15:00		243.2	90.7462	0.5002	0.955306	1.4742	14.2	2.21	101	0	1.67898	0.335796
2015-12-08 19:30:00		242.559	90.448	0.5002	0.955306	1.8774	14.2	3.06	103	0	2.01478	0.167899
2015-12-08 19:45:00		241.371	90.1246	0.5246	0.992638	1.9782	14.2	2.88	88	0	2.18276	0.167905
2015-12-08 20:00:00		238.768	89.1582	0.5246	0.992638	2.1672	13.8	2.75	71	0	2.35071	0.167908
2015-12-08 20:15:00		237.361	88.6737	0.5124	0.973972	1.9782	13.4	2	67	0	1.84691	0.167901
2015-12-08 20:30:00		237.838	88.8864	0.5368	1.0113	1.9656	13.3	1.23	49	0	1.8469	0.1679
2015-12-08 20:45:00		239.832	89.6597	0.4636	0.899308	1.6821	13	1.59	48	0	2.0148	0.1679
2015-12-08 21:00:00		240.151	89.8845	0.488	0.93664	1.5813	12.9	1.11	14	0	2.1827	0.335799
2015-12-08 21:15:00		241.552	90.4027	0.5124	0.973972	1.4805	12.8	0.92	357	0	1.84695	0.167904
2015-12-08 21:30:00		241.745	90.5475	0.488	0.93664	1.4616	13	1.6	60	0	2.0148	0.335799
2015-12-08 21:45:00		242.109	90.9008	0.4514	0.880642	1.2852	13.1	0.57	172	0	1.84689	0.167899
2015-12-08 22:00:00		242.224	91.1062	0.4148	0.824644	1.3041	13.4	0.71	148	0	2.01478	0.335796
2015-12-08 22:15:00		243.667	91.74	0.427	0.84331	1.0962	13.4	1.04	110	0	1.84688	0.167898
2015-12-08 22:30:00		245.503	92.4545	0.4514	0.880642	1.1214	13.1	0.8	111	0	2.01478	0.335796
2015-12-08 22:45:00		243.171	91.6147	0.4514	0.880642	1.0962	12.7	1.13	287	0	1.84693	0.167903
2015-12-08 23:00:00		241.225	90.8903	0.427	0.84331	1.0647	13.1	0.59	227	0	1.8469	0.1679
2015-12-08 23:15:00		240.346	90.6378	0.4148	0.824644	1.0836	13	0.67	275	0	1.84689	0.167899
2015-12-08 23:30:00		240.332	90.5798	0.427	0.84331	1.1088	13	0.68	288	0	1.84689	0.335799
2015-12-08 23:45:00		239.544	90.6079	0.427	0.84331	1.0332	13	1.62	281	0	4.3655	0.167904
2015-12-09		240.148	90.8202	0.427	0.84331	1.0332	12.8	2.6	327	0	14.7754	0.167902
2015-12-09 00:15:00		239.323	90.5931	0.4026	0.805978	1.0332	12.7	0.71	242	0	18.3022	0.16791
2015-12-09 00:30:00		241.799	91.4801	0.3904	0.787312	1.0332	12.9	0.42	190	0	23.0044	0.33583
2015-12-09 00:45:00		240.951	91.1749	0.4026	0.805978	1.0899	13	0.68	280	0	19.9824	0.16792
2015-12-09 01:00:00		242.828	91.6592	0.427	0.84331	1.0458	12.9	0.68	203	0	21.3255	0.167917
2015-12-09 01:15:00		242.565	91.5014	0.427	0.84331	1.0647	13	1.19	305	0	21.662	0.167922
2015-12-09 01:30:00		242.819	91.4476	0.4514	0.880642	1.0647	13	2.4	266	0	28.8828	0.167923
2015-12-09 01:45:00		240.577	90.4854	0.427	0.84331	1.0773	12.9	2.54	266	0	17.464	0.167923
2015-12-09 02:00:00		237.529	89.3639	0.427	0.84331	1.0395	12.6	2.84	273	0	12.5944	0.167926
2015-12-09 02:15:00		239.35	90.4104	0.4514	0.880642	1.071	12.5	3.18	254	0	16.4568	0.335852
2015-12-09 02:30:00		239.217	90.0191	0.366	0.74998	1.0584	12.5	3	279	0	10.7472	0.167924
2015-12-09 02:45:00		243.292	91.1161	0.488	0.93664	1.1025	12.6	3	267	0	8.22837	0.167926
2015-12-09 03:00:00		242.092	90.6271	0.5612	1.04864	1.0899	12.5	3.69	279	0	6.88497	0.167926
2015-12-09 03:15:00		242.075	91.083	0.4148	0.824644	1.0836	12.6	3.98	285	0	4.36608	0.335852
2015-12-09 03:30:00		245.819	92.8648	0.3904	0.787312	1.0458	12.7	4.57	285	0	4.19815	0.167926
2015-12-09 03:45:00		246.303	92.9726	0.4026	0.805978	1.0899	12.5	4.55	289	0	4.03023	0.335852
2015-12-09 04:00:00		245.42	92.5451	0.4148	0.824644	1.0836	12.6	4.54	285	0	4.03023	0.335852
2015-12-09 04:15:00		244.968	92.3354	0.427	0.84331	1.0647	12.9	4.48	289	0	4.03023	0.335852
2015-12-09 04:30:00		246.092	92.6644	0.427	0.84331	1.134	13.1	5.38	284	0	4.03023	0.335852
2015-12-09 04:45:00		246.469	92.7337	0.4148	0.824644	1.0521	12.7	4.5	275	6.58231	4.03023	0.167926
2015-12-09 05:00:00		244.819	92.0821	0.3904	0.787312	1.0647	13	4.2	271	0	4.03023	0.167926
2015-12-09 05:15:00		243.734	91.5629	0.4392	0.861976	1.0647	12.7	2.8	269	3.29115	4.19815	0.335852
2015-12-09 05:30:00		242.543	91.054	0.427	0.84331	1.1088	12.5	3.8	278	3.29115	4.36608	0.335852
2015-12-09 05:45:00		239.289	89.8371	0.4758	0.917974	1.0773	12.7	2.61	276	0	4.36608	0.335852
2015-12-09 06:00:00		239.672	89.8271	0.4392	0.861976	1.0584	12.7	2.47	266	0	4.03023	0.335852
2015-12-09 06:15:00		241.426	90.4081	0.4148	0.824644	1.0773	12.5	2.53	265	0	4.19815	0.167926
2015-12-09 06:30:00		239.171	89.457	0.4758	0.917974	1.1025	12.4	2.93	284	0	4.19815	0.335852
2015-12-09 06:45:00		241.726	90.0508	0.3904	0.787312	1.0899	11.9	3.81	287	0	4.534	0.335852
2015-12-09 07:00:00		240.326	89.8959	0.4514	0.880642	1.1025	12.3	3.47	279	0	4.36608	0.335852
2015-12-09 07:15:00		239.515	89.7655	0.366	0.74998	1.0962	12.4	2.66	263	0	4.534	0.335852
2015-12-09 07:30:00		240.49	90.1526	0.3904	0.787312	1.071	12.6	3.61	283	0	4.36619	0.16793
2015-12-09 07:45:00		237.648	89.0703	0.4026	0.805978	1.0962	12.5	2.45	263	0	4.36617	0.335859
2015-12-09 08:00:00		239.36	89.6605	0.3782	0.768646	1.0962	12.1	4.77	281	6.58231	5.3738	0.671725
2015-12-09 08:15:00		247.421	92.6844	0.3538	0.731314	1.2915	12.7	6.15	298	19.7469	9.06821	1.6793
2015-12-09 08:30:00		249.023	93.3369	0.3172	0.675316	1.1403	12.2	4.53	16	46.0761	13.0987	3.6945
2015-12-09 08:45:00		256.1	96.0024	0.3294	0.693982	1.0899	12.5	4.08	312	75.6965	16.9608	3.35858
2015-12-09 09:00:00		264.364	99.0091	0.3294	0.693982	1.0962	11.8	2.42	308	88.8611	24.1826	9.2364
2015-12-09 09:15:00		273.092	102.13	0.3172	0.675316	1.0899	11.9	4.01	313	246.837	33.0829	13.4347
2015-12-09 09:30:00		277.432	103.757	0.4026	0.805978	1.0899	12.2	1.58	302	306.077	40.8097	18.1377
2015-12-09 09:45:00		280.584	104.952	0.3294	0.693982	1.1088	12.1	2.96	328	378.483	48.5327	23.1748
2015-12-09 10:00:00		272.648	102.037	0.2806	0.619318	1.1025	12.4	4.25	304	441.014	56.4234	28.5476
2015-12-09 10:15:00		274.236	102.656	0.3294	0.693982	1.1529	12.6	4.23	317	510.129	64.4837	33.9211
2015-12-09 10:30:00		278.464	104.188	0.305	0.65665	1.1529	12.7	4.43	311	582.522	71.8724	39.4626
2015-12-09 10:45:00		277.118	103.704	0.305	0.65665	1.1466	12.9	5.9	308	635.191	78.5875	44.8352
2015-12-09 11:00:00		279.008	104.423	0.2928	0.637984	1.1844	12.9	4.81	324	694.433	85.8028	50.0377
2015-12-09 11:15:00		275.319	103.027	0.3294	0.693982	1.1592	13	5.49	334	740.505	91.1696	54.7353
2015-12-09 11:30:00		275.94	103.312	0.3172	0.675316	1.134	13	3.91	327	786.585	95.8698	59.1001
2015-12-09 11:45:00		273.477	102.492	0.2928	0.637984	1.1529	13.4	4.32	318	819.447	99.5639	62.4583
2015-12-09 12:00:00		275.028	103.156	0.2806	0.619318	1.1592	13.6	4.86	322	845.663	100.571	65.4804
2015-12-09 12:15:00		276.325	103.712	0.2928	0.637984	1.0962	13.8	4.68	325	865.426	102.418	67.1592
2015-12-09 12:30:00		278.166	104.487	0.2928	0.637984	1.1151	13.8	5.18	329	878.484	103.929	68.5024
2015-12-09 12:45:00		280.15	105.268	0.2928	0.637984	1.134	14	4.84	321	891.613	104.097	68.6703
2015-12-09 13:00:00		276.583	103.994	0.3172	0.675316	1.1466	14.2	5.99	324	885.029	103.425	67.8308
2015-12-09 13:15:00		275.352	103.555	0.305	0.65665	1.1466	14	4.91	332	875.159	101.243	65.816
2015-12-09 13:30:00		272.551	102.573	0.305	0.65665	1.1403	13.9	6.13	339	865.289	98.7224	63.4644
2015-12-09 13:45:00		278.267	104.778	0.2928	0.637984	1.1844	14.2	7.61	322	838.968	95.0301	60.1074
2015-12-09 14:00:00		279.047	105.147	0.3172	0.675316	1.1466	14.1	5.38	340	802.778	89.489	55.9096
2015-12-09 14:15:00		279.553	105.428	0.3172	0.675316	1.134	14	5.09	329	766.587	84.114	51.375
2015-12-09 14:30:00		276.475	104.265	0.305	0.65665	1.1151	14.2	6.17	335	720.526	77.3942	46.1679
2015-12-09 14:45:00		280.871	106.011	0.3416	0.712648	1.1781	14.5	7.18	324	658.014	70.174	40.6271
2015-12-09 15:00:00		283.526	107.104	0.3904	0.787312	1.134	14.4	7.6	335	608.663	62.2869	32.5705
2015-12-09 15:15:00		283.006	106.912	0.366	0.74998	1.0899	14.5	5.87	325	539.572	54.0592	29.2121
2015-12-09 15:30:00		281.983	106.485	0.3538	0.731314	1.0773	14.7	6.54	333	463.9	45.6621	23.5025
2015-12-09 15:45:00		280.959	106.022	0.3294	0.693982	1.071	14.8	5.34	327	384.938	37.1003	18.4662
2015-12-09 16:00:00		275.395	103.887	0.3294	0.693982	1.0962	14.5	5.32	329	302.687	29.042	13.5977
2015-12-09 16:15:00		271.114	102.34	0.305	0.65665	1.0962	14.4	7.63	325	220.435	21.6556	9.40087
2015-12-09 16:30:00		266.827	100.78	0.3294	0.693982	1.1214	14.3	8.35	309	144.763	14.7726	6.04332
2015-12-09 16:45:00		258.771	97.7643	0.3294	0.693982	1.1151	14	6.86	317	42.7709	8.72985	3.6934
2015-12-09 17:00:00		256.404	96.9029	0.3294	0.693982	1.0836	13.8	6.37	315	19.7404	4.53314	1.67894
2015-12-09 17:15:00		256.275	96.8206	0.3172	0.675316	1.0836	13.6	5.26	306	0	1.84687	0.67159
2015-12-09 17:30:00		254.829	96.2039	0.3416	0.712648	1.0773	13.2	6.44	306	0	1.00739	0.335796
2015-12-09 17:45:00		254.192	95.9215	0.3294	0.693982	1.1088	12.8	5.56	288	0	0.83949	0.167898
2015-12-09 18:00:00		255.788	96.4396	0.4026	0.805978	1.1214	12.7	4.33	293	0	0.671606	0.335803
2015-12-09 18:15:00		256.057	96.4165	0.3538	0.731314	1.0773	12.5	4.41	284	0	0.503702	0.335801
2015-12-09 18:30:00		255.914	96.2323	0.3782	0.768646	1.0773	12.2	2.46	279	0	0.671593	0.335796
2015-12-09 18:45:00		254.924	95.9177	0.366	0.74998	1.0584	11.9	2.24	316	0	1.0075	0.167917
2015-12-09 19:00:00		256.279	96.3381	0.3782	0.768646	1.0584	12.1	1.72	309	0	0.335851	0.335851
2015-12-09 19:15:00		257.156	96.6068	0.4148	0.824644	1.0269	12	2.07	338	0	1.00756	0.167926
2015-12-09 19:30:00		256.237	96.3555	0.3172	0.675316	1.0962	12	5.29	301	0	0.83963	0.167926
2015-12-09 19:45:00		254.199	95.5351	0.3538	0.731314	1.1088	11.6	2.42	323	0	1.00757	0.335858
2015-12-09 20:00:00		253.054	95.04	0.3294	0.693982	1.1214	11.4	2.95	333	0	0.671752	0.335876
2015-12-09 20:15:00		252.65	94.8657	0.3538	0.731314	1.1025	11.3	2.27	340	0	0.671783	0.167946
2015-12-09 20:30:00		250.925	94.2463	0.3538	0.731314	1.0836	11.2	2.2	336	0	0.671812	0.167953
2015-12-09 20:45:00		246.011	92.4305	0.3416	0.712648	1.0773	10.3	0.42	157	0	0.839771	0.167954
2015-12-09 21:00:00		250.592	94.0464	0.366	0.74998	1.0584	10.5	1.55	264	0	0.671817	0.167954
2015-12-09 21:15:00		250.189	93.8233	0.3416	0.712648	1.071	10.9	2.2	285	0	0.503874	0.335916
2015-12-09 21:30:00		255.796	95.6363	0.366	0.74998	1.0395	10.4	2.51	277	0	0.50393	0.335953
2015-12-09 21:45:00		258.268	96.4363	0.3782	0.768646	1.0269	10.5	2.63	271	0	0.839905	0.335962
2015-12-09 22:00:00		255.85	95.3896	0.4148	0.824644	1.008	9.9	2.35	253	0	0.503947	0.167982
2015-12-09 22:15:00		253.978	94.6399	0.4148	0.824644	1.0143	9.9	2.42	284	0	0.839912	0.335965
2015-12-09 22:30:00		253.115	94.3537	0.3782	0.768646	1.0206	9.1	0.45	211	0	0.167983	0.167983
2015-12-09 22:45:00		253.324	94.4917	0.3538	0.731314	1.0269	9.8	2.69	279	0	1.51184	0.167983
2015-12-09 23:00:00		252.135	94.0449	0.3782	0.768646	1.0269	9.6	3.22	274	0	2.51974	0.335965
2015-12-09 23:15:00		250.527	93.4447	0.366	0.74998	1.0206	9.3	1.8	257	0	2.68772	0.335965
2015-12-09 23:30:00		250.224	93.3189	0.3782	0.768646	1.0395	9.2	1.85	258	0	2.68772	0.335965
2015-12-09 23:45:00		250.509	93.4317	0.3538	0.731314	1.0332	8.9	1.6	258	0	2.35175	0.167983
2015-12-10		250.672	93.4134	0.3782	0.768646	1.0332	9.2	2.18	251	0	2.51974	0.335965
2015-12-10 00:15:00		250.09	93.1864	0.3782	0.768646	1.0395	9.1	3.11	258	0	2.35175	0.335965
2015-12-10 00:30:00		250.409	93.3267	0.366	0.74998	1.0395	9	1.85	273	0	2.8557	0.335965
2015-12-10 00:45:00		249.415	92.8608	0.3904	0.787312	1.0017	8.3	1.58	269	0	2.51974	0.335965
2015-12-10 01:00:00		249.675	92.9047	0.3416	0.712648	1.0143	8.2	2.33	308	0	3.02368	0.167983
2015-12-10 01:15:00		248.561	92.4435	0.3538	0.731314	1.0206	7.6	1.94	291	0	2.68772	0.335965
2015-12-10 01:30:00		248.744	92.5469	0.366	0.74998	1.008	6.8	1.7	268	0	2.18377	0.167983
2015-12-10 01:45:00		250.274	93.0807	0.3782	0.768646	1.008	6.1	2.36	287	0	2.51978	0.167985
2015-12-10 02:00:00		248.238	92.2037	0.3416	0.712648	1.008	6	2.41	284	0	2.68781	0.167988
2015-12-10 02:15:00		247.55	91.9206	0.366	0.74998	1.0143	6	2.15	268	0	2.68803	0.168002
2015-12-10 02:30:00		247.353	91.7787	0.366	0.74998	1.0206	6.2	2.6	317	0	2.52029	0.336039
2015-12-10 02:45:00		247.155	91.7623	0.3416	0.712648	1.008	6	1.83	262	0	2.68846	0.336057
2015-12-10 03:00:00		245.627	91.034	0.3416	0.712648	1.0332	6.3	1.93	273	0	2.68838	0.336048
2015-12-10 03:15:00		245.056	90.8432	0.366	0.74998	1.0143	6.8	1.89	254	0	2.52033	0.168022
2015-12-10 03:30:00		244.725	90.6151	0.3904	0.787312	1.0143	6.7	1.06	285	0	2.52038	0.336051
2015-12-10 03:45:00		243.826	90.2355	0.3782	0.768646	1.008	7.4	1.45	284	0	2.85648	0.168028
2015-12-10 04:00:00		243.117	89.8642	0.427	0.84331	1.0017	6.5	1.07	258	0	2.52048	0.168032
2015-12-10 04:15:00		241.299	89.1302	0.427	0.84331	0.9828	6.2	0.77	298	0	2.68855	0.168035
2015-12-10 04:30:00		235.17	86.726	0.427	0.84331	0.9891	7.2	2.52	314	0	2.52052	0.168035
2015-12-10 04:45:00		235.305	86.8512	0.366	0.74998	1.0332	6.3	1.2	220	0	2.52058	0.168039
2015-12-10 05:00:00		239.422	88.3394	0.4148	0.824644	1.0395	6.8	1.09	312	0	2.68862	0.336078
2015-12-10 05:15:00		242.733	89.7631	0.3904	0.787312	1.0143	6.7	1.31	252	0	2.52053	0.168035
2015-12-10 05:30:00		239.819	88.6509	0.427	0.84331	1.0332	6	1.56	257	0	2.35254	0.336077
2015-12-10 05:45:00		241.065	89.1159	0.427	0.84331	1.0269	6.7	1.58	285	0	2.52058	0.168039
2015-12-10 06:00:00		244.147	90.2038	0.4392	0.861976	1.0269	7.3	1.79	280	0	2.68862	0.336078
2015-12-10 06:15:00		241.465	89.1644	0.366	0.74998	1.0206	6.5	1.9	14	0	2.35255	0.168039
2015-12-10 06:30:00		239.199	88.0926	0.3538	0.731314	1.0269	6.5	1.15	342	0	2.35255	0.168039
2015-12-10 06:45:00		239.647	88.3226	0.4026	0.805978	1.0458	6.8	1.35	358	0	2.52059	0.336078
2015-12-10 07:00:00		236.84	87.2775	0.3782	0.768646	1.008	6.2	1.49	271	0	2.35255	0.168039
2015-12-10 07:15:00		229.931	85.3118	0.3904	0.787312	1.2663	6.2	0.78	210	0	2.35255	0.168039
2015-12-10 07:30:00		230.415	85.5632	0.3904	0.787312	1.7892	5.5	0.64	236	0	2.01647	0.168039
2015-12-10 07:45:00		230.948	86.1468	0.3416	0.712648	1.323	5.4	0.6	234	0	2.01647	0.168039
2015-12-10 08:00:00		234.947	87.6479	0.3294	0.693982	1.2663	5.9	0.54	275	6.58447	3.52882	0.336078
2015-12-10 08:15:00		245.715	91.6409	0.305	0.65665	1.3041	7	0.69	341	26.3379	5.88136	1.68039
2015-12-10 08:30:00		257.101	96.0982	0.2928	0.637984	1.4364	5.7	0.25	225	49.3838	10.0823	3.52882
2015-12-10 08:45:00		271.044	101.379	0.2684	0.600652	1.4553	6.5	1.04	21	72.433	16.1317	5.71333
2015-12-10 09:00:00		284.932	106.391	0.2684	0.600652	1.4049	7.1	0.05	357	92.1872	22.6853	9.0741
2015-12-10 09:15:00		295.921	110.792	0.2806	0.619318	1.4175	7.5	0.57	242	237.051	30.7511	13.107
2015-12-10 09:30:00		292.635	109.677	0.3538	0.731314	1.5309	7.4	0.64	335	306.187	37.9768	17.6441
2015-12-10 09:45:00		307.926	115.526	0.305	0.65665	1.4175	7.6	0.5	342	375.316	46.2107	22.5172
2015-12-10 10:00:00		309.125	115.907	0.305	0.65665	1.3482	7.9	0.68	343	444.452	53.433	27.8927
2015-12-10 10:15:00		297.613	111.683	0.3172	0.675316	1.4238	8.1	1.29	326	513.589	61.3301	33.2695
2015-12-10 10:30:00		302.62	113.25	0.2806	0.619318	1.4742	8.4	0.49	338	579.357	68.875	38.6372
2015-12-10 10:45:00		332.605	124.279	0.305	0.65665	1.2159	8.7	0.95	253	641.827	76.2643	44.0116
2015-12-10 11:00:00		326.058	121.414	0.2928	0.637984	1.2978	10	0.26	159	694.439	82.6474	49.0509
2015-12-10 11:15:00		313.167	116.565	0.2806	0.619318	1.2285	9.9	1.32	333	740.51	87.6766	53.7481
2015-12-10 11:30:00		318.803	118.967	0.3172	0.675316	1.3671	10.3	1.17	358	786.586	92.5318	57.7694
2015-12-10 11:45:00		309.8	114.687	0.3294	0.693982	1.2474	10.9	2.72	10	816.185	96.2222	61.1254
2015-12-10 12:00:00		300.535	111.34	0.2928	0.637984	1.1151	11	2.31	5	845.824	99.0632	63.8034
2015-12-10 12:15:00		300.378	111.042	0.3416	0.712648	1.1151	11.4	1.33	61	865.421	100.742	65.4824
2015-12-10 12:30:00		320	118.552	0.3172	0.675316	1.1403	11.8	0.44	97	868.59	100.739	65.6483
2015-12-10 12:45:00		332.32	122.855	0.3294	0.693982	1.0773	11.5	2.4	112	878.45	100.901	65.4767
2015-12-10 13:00:00				0.3294	0.693982	1.0647	11.6	0.9	126	871.869	98.8765	64.127
2015-12-10 13:15:00				0.3294	0.693982	1.1277	11.9	2.12	117	871.784	98.0352	62.7828
2015-12-10 13:30:00				0.2928	0.637984	1.1277	12.1	2	89	858.6	96.5247	60.7686
2015-12-10 13:45:00				0.3172	0.675316	1.1151	12.3	2.21	122	753.244	79.2254	51.6979
2015-12-10 14:00:00				0.3416	0.712648	1.134	12.5	3.45	89	802.535	88.6209	53.8775
2015-12-10 14:15:00				0.3538	0.731314	1.134	12.5	2.52	95	759.759	82.9124	49.3446
2015-12-10 14:30:00		341.598	126.532	0.3782	0.768646	1.1592	12.7	2.12	107	713.711	76.193	44.1382
2015-12-10 14:45:00		342.342	126.736	0.4148	0.824644	1.0962	12.8	2.59	131	667.665	68.9719	38.5974
2015-12-10 15:00:00		349.817	129.659	0.4636	0.899308	1.0899	12.9	2.63	88	595.307	57.728	33.2272
2015-12-10 15:15:00		337.189	124.976	0.4392	0.861976	1.1844	13.1	0.91	155	532.816	53.7003	27.857
2015-12-10 15:30:00		341.439	126.465	0.3538	0.731314	1.0962	12.9	2.5	126	463.748	45.6431	22.486
2015-12-10 15:45:00		324.344	120.272	0.366	0.74998	1.0899	12.9	2.63	126	378.234	37.4204	17.4516
2015-12-10 16:00:00		313.148	116.128	0.4392	0.861976	1.0962	12.9	2.71	113	286.142	29.1983	12.7533
2015-12-10 16:15:00		302.304	112.215	0.3294	0.693982	1.071	13	1.63	105	220.362	22.1513	8.72626
2015-12-10 16:30:00		313.213	116.242	0.427	0.84331	1.2285	12.9	1.9	129	154.583	15.7744	5.70565
2015-12-10 16:45:00		284.145	105.561	0.3294	0.693982	1.0458	12.4	1.63	120	55.9128	10.9079	3.35627
2015-12-10 17:00:00		265.241	98.4436	0.5124	0.973972	1.1214	12.2	1.13	130	26.3119	6.54494	1.67819
2015-12-10 17:15:00		251.245	93.2295	0.4148	0.824644	1.5057	12	1.26	105	6.57798	4.02789	0.503486
2015-12-10 17:30:00		246.496	91.4095	0.427	0.84331	2.1735	11.7	1.32	119	0	2.85328	0.33568
2015-12-10 17:45:00		238.41	88.3087	0.4758	0.917974	1.89	11.5	1.22	134	0	2.85372	0.335732
2015-12-10 18:00:00		239.091	88.5285	0.5246	0.992638	3.5154	11.3	0.22	159	0	2.51804	0.335739
2015-12-10 18:15:00		235.236	87.1504	0.5002	0.955306	1.8018	11.2	0.59	116	0	2.68596	0.335745
2015-12-10 18:30:00		240.138	89.0142	0.427	0.84331	1.5057	10.6	0.32	142	0	2.18264	0.33579
2015-12-10 18:45:00		232.429	86.3733	0.488	0.93664	1.4679	10.2	0.48	236	0	2.51853	0.167902
2015-12-10 19:00:00		234.806	87.366	0.4514	0.880642	1.4616	9.4	0.48	240	0	2.68648	0.33581
2015-12-10 19:15:00		233.804	87.0777	0.4392	0.861976	1.3356	9.1	0.74	244	0	2.35093	0.167924
2015-12-10 19:30:00		231.442	86.177	0.5368	1.0113	1.2411	9.6	0.71	272	0	2.51896	0.335862
2015-12-10 19:45:00		232.295	86.447	0.4514	0.880642	1.2285	8.7	0.67	214	0	2.0154	0.16795
2015-12-10 20:00:00		233.939	87.0274	0.4514	0.880642	1.1655	8.4	0.92	218	0	2.01547	0.335912
2015-12-10 20:15:00		230.986	86.2168	0.4758	0.917974	1.2348	8.3	0.37	235	0	2.18368	0
2015-12-10 20:30:00		230.005	85.8714	0.5246	0.992638	1.2222	8.4	0.58	256	0	2.01578	0.167982
2015-12-10 20:45:00		233.288	87.2567	0.4026	0.805978	1.3797	8.4	0.88	247	0	2.18377	0.167982
2015-12-10 21:00:00		239.693	89.3374	0.427	0.84331	1.2411	8.8	0.63	357	0	2.01579	0.335965
2015-12-10 21:15:00		241.406	89.3073	0.4392	0.861976	1.2096	8.8	1.19	256	0	2.01579	0.335965
2015-12-10 21:30:00		238.829	88.507	0.4514	0.880642	1.2411	8.4	1.14	256	0	2.01579	0.167983
2015-12-10 21:45:00		242.681	89.9509	0.5246	0.992638	1.2915	8.5	1.35	271	0	1.67982	0.167983
2015-12-10 22:00:00		245.563	91.1453	0.5002	0.955306	1.197	8.6	0.76	333	0	2.01579	0.335965
2015-12-10 22:15:00		255.614	94.892	0.4392	0.861976	1.1907	8.6	0.83	306	0	2.01579	0.167983
2015-12-10 22:30:00		259.452	96.2601	0.4514	0.880642	1.1907	8.5	1.09	332	0	1.67982	0.335965
2015-12-10 22:45:00		258.367	95.8296	0.4636	0.899308	1.1592	8.3	1.7	344	0	1.84781	0.167983
2015-12-10 23:00:00		255.32	94.7431	0.4758	0.917974	1.1466	8.2	1.27	34	0	1.51184	0.335965
2015-12-10 23:15:00		257.468	95.5918	0.4148	0.824644	1.1844	7.3	0.37	216	0	1.51184	0.167983
2015-12-10 23:30:00		253.348	93.8201	0.6344	1.16063	1.4238	7.2	1.02	241	0	1.51185	0.167984
2015-12-10 23:45:00		250.987	92.9723	0.7076	1.27263	1.3041	8	1.59	291	0	1.34389	0.335972
2015-12-11		252.255	93.3895	0.6954	1.25396	1.3482	8.5	2.18	22	0	1.34391	0.167989
2015-12-11 00:15:00		252.489	93.4996	0.6832	1.2353	1.4301	8.5	1.58	41	0	1.34395	0.167994
2015-12-11 00:30:00		253.246	93.9595	0.6466	1.1793	1.3041	8.5	2.31	27	0	1.34393	0.335983
2015-12-11 00:45:00		253.558	94.1543	0.4514	0.880642	1.2474	8.9	0.78	30	0	1.67991	0.335982
2015-12-11 01:00:00		254.05	94.3255	0.5612	1.04864	1.3104	8.9	1	20	0	1.51189	0.167987
2015-12-11 01:15:00		253.587	94.0683	0.4392	0.861976	1.2033	8.7	1.1	272	0	1.67984	0.167984
2015-12-11 01:30:00		240.233	88.6796	0.427	0.84331	1.1907	8.9	0.59	212	0	1.34386	0.335965
2015-12-11 01:45:00		239.214	88.261	0.4148	0.824644	1.1907	9.2	1.63	11	0	1.34387	0.335968
2015-12-11 02:00:00		238.265	87.8797	0.4148	0.824644	1.1781	9.4	1.05	17	0	1.51184	0.335965
2015-12-11 02:15:00		239.557	88.3038	0.4148	0.824644	1.1655	9	0.28	207	0	1.51184	0.335965
2015-12-11 02:30:00		240.72	89.0299	0.4392	0.861976	1.1529	8.8	0.72	216	0	1.17588	0.167983
2015-12-11 02:45:00		243.117	90.1066	0.427	0.84331	1.1529	8.8	0.51	152	0	1.17588	0.167983
2015-12-11 03:00:00		245.46	91.3579	0.427	0.84331	1.1592	9.3	1.86	324	0	1.34386	0.335965
2015-12-11 03:15:00		243.547	90.2473	0.4758	0.917974	1.197	9.2	2.14	357	0	1.34386	0.167983
2015-12-11 03:30:00		244.741	90.5221	0.4636	0.899308	1.2033	9.1	1.95	12	0	1.51184	0.335965
2015-12-11 03:45:00		243.746	89.9095	0.4514	0.880642	1.1844	9	0.71	216	0	1.51184	0.167983
2015-12-11 04:00:00		241.462	89.2325	0.4636	0.899308	1.2222	9.1	0.3	219	0	1.17588	0.167983
2015-12-11 04:15:00		238.368	88.1114	0.4392	0.861976	1.1907	9.2	0.38	149	0	1.51184	0.167983
2015-12-11 04:30:00		238.467	87.9383	0.4636	0.899308	1.1907	9.1	0.3	297	0	1.67983	0.335965
2015-12-11 04:45:00		234.689	86.5114	0.4636	0.899308	1.197	9.4	0.56	7	0	1.51184	0.167983
2015-12-11 05:00:00		227.148	83.7822	0.427	0.84331	1.1592	9.2	0.53	254	0	1.34386	0.335965
2015-12-11 05:15:00		231.57	85.6898	0.488	0.93664	1.2474	9	1.44	285	0	1.34386	0.167983
2015-12-11 05:30:00		230.836	85.2527	0.4148	0.824644	1.1781	9	1.13	268	0	1.34386	0.167983
2015-12-11 05:45:00		231.524	85.7494	0.3904	0.787312	1.1592	9	0.42	247	0	1.17588	0.167983
2015-12-11 06:00:00		239.878	88.7325	0.4758	0.917974	1.1529	9.2	0.67	329	0	1.17588	0.335965
2015-12-11 06:15:00		240.755	89.1538	0.5368	1.0113	1.134	9.2	0.54	52	0	1.51184	0.167983
2015-12-11 06:30:00		246.951	91.454	0.4636	0.899308	1.2033	9.1	0.39	136	0	1.17588	0.167983
2015-12-11 06:45:00		245.149	90.929	0.4636	0.899308	1.1718	9.3	0.68	276	0	1.51184	0.167983
2015-12-11 07:00:00		242.669	90.1331	0.427	0.84331	1.1592	9.4	1.79	316	0	1.51184	0.167983
2015-12-11 07:15:00		228.261	84.6446	0.4514	0.880642	1.1718	9.2	1.89	331	0	1.17588	0.335965
2015-12-11 07:30:00		223.963	83.099	0.4514	0.880642	1.3041	9.3	1.53	354	0	1.34386	0.335965
2015-12-11 07:45:00		233.691	86.9251	0.4636	0.899308	1.3734	9.3	1.6	357	0	1.34386	0.335965
2015-12-11 08:00:00		236.432	88.214	0.4392	0.861976	1.4616	9.4	0.78	10	6.58289	2.18377	0.503948
2015-12-11 08:15:00		242.571	90.2878	0.427	0.84331	1.3419	8.4	0.84	186	19.748	4.36755	1.51184
2015-12-11 08:30:00		250.523	93.1886	0.4026	0.805978	1.4742	8.3	0.94	232	36.2066	8.39913	3.02369
2015-12-11 08:45:00				0.3904	0.787312	1.4868	8.3	0.95	199	78.9977	13.9426	5.03948
2015-12-11 09:00:00				0.3904	0.787312	1.4364	8.7	0.52	243	115.207	20.1579	8.23114
2015-12-11 09:15:00				0.4514	0.880642	1.4868	9.5	0.27	168	220.535	26.5412	11.5908
2015-12-11 09:30:00				0.427	0.84331	1.3419	9.3	1.39	291	292.96	33.5965	15.7904
2015-12-11 09:45:00				0.4148	0.824644	1.4364	9.6	1.46	282	339.045	41.6597	20.3259
2015-12-11 10:00:00				0.4636	0.899308	1.3797	9.9	1.24	312	391.673	48.043	24.8614
2015-12-11 10:15:00					0.19
2015-12-11 10:30:00				0.2806	0.619318	1.2789	10.1	1.01	307	523.318	61.9856	34.7724
2015-12-11 10:45:00				0.4514	0.880642	1.3734	10.1	1.7	324	562.788	66.849	38.9672
2015-12-11 11:00:00	11.34	247.043	92.1314	0.366	0.74998	1.2915	9.7	1.46	272	622.026	74.061	43.832
2015-12-11 11:15:00	11.28	249.578	93.0601	0.3904	0.787312	1.2726	10.2	0.63	279	694.431	81.9486	49.3707
2015-12-11 11:30:00	11.3	250.801	93.5474	0.4148	0.824644	1.2978	10.6	0.79	321	740.507	87.3156	53.7327
2015-12-11 11:45:00	11.16	250.565	93.1949	0.488	0.93664	1.8711	10.9	0.93	311	753.593	89.6599	56.5831
2015-12-11 12:00:00	11.12	250.307	93.1304	0.4392	0.861976	1.7073	11.1	0.89	286	812.678	94.6947	59.7718
2015-12-11 12:15:00	10.94	253.462	93.9926	0.5124	0.973972	1.26	11	1.14	303	838.969	97.5451	62.12
2015-12-11 12:30:00	10.94	256.055	94.9849	0.3904	0.787312	1.26	11.7	1.51	281	845.546	98.3736	63.1203
2015-12-11 12:45:00	10.98	257.592	95.7195	0.3782	0.768646	1.1655	12.1	1.54	258	865.223	99.7148	63.7906
2015-12-11 13:00:00	10.98	260.094	96.7303	0.3904	0.787312	1.2348	12.2	2.14	279	865.196	99.0432	63.1191
2015-12-11 13:15:00	11	258.642	96.2172	0.4392	0.861976	1.1277	12.9	1.61	248	858.595	97.1956	61.6076
2015-12-11 13:30:00	10.98	253.143	94.1183	0.4758	0.917974	1.1466	13	0.97	207	838.77	94.1626	58.7467
2015-12-11 13:45:00	11.02	257.515	95.8715	0.488	0.93664	1.197	13	1.5	267	782.792	78.7179	51.024
2015-12-11 14:00:00	11.01	258.916	96.3746	0.5246	0.992638	1.2096	13.2	1.16	263	786.067	85.9262	52.0257
2015-12-11 14:15:00	11.02	258.898	96.3754	0.5002	0.955306	1.1718	13.3	1.16	295	749.887	80.7188	47.6594
2015-12-11 14:30:00	11.02	259.027	96.3924	0.5002	0.955306	1.2096	13.7	0.91	299	700.553	74.1677	42.6213
2015-12-11 14:45:00	11.04	259.235	96.547	0.549	1.02997	1.1718	14.2	0.79	160	647.929	66.9474	37.5845
2015-12-11 15:00:00	11.04	260.446	96.961	0.5002	0.955306	1.2915	13.9	2.12	233	582.149	54.6983	32.215
2015-12-11 15:15:00	11.05	260.153	96.8678	0.5002	0.955306	1.1466	13.7	1.16	247	516.37	51.3423	26.6779
2015-12-11 15:30:00	11.06	259.355	96.5732	0.5124	0.973972	1.1781	13.5	1.56	210	444.012	43.2886	21.6443
2015-12-11 15:45:00	10.9	257.489	95.7924	0.5246	0.992638	1.3923	13.7	1.15	215	358.499	35.2355	16.7788
2015-12-11 16:00:00	10.76	254.344	94.1284	0.671	1.21663	1.1655	13.3	0.97	123	279.563	27.6849	12.4163
2015-12-11 16:15:00	10.78	253.917	93.9507	0.5856	1.08597	1.2159	13.2	1.03	195	207.206	20.6382	8.72508
2015-12-11 16:30:00	10.79	253.309	93.7469	0.6954	1.25396	1.3104	12.8	1.3	144	134.848	14.0958	5.53765
2015-12-11 16:45:00	10.83	254.246	94.1484	0.6222	1.14197	1.4175	12.4	1.23	140	55.9126	8.72626	3.35625
2015-12-11 17:00:00	10.81	254.43	94.2071	0.5734	1.0673	1.4049	12.2	0.48	181	26.3118	4.36358	1.6783
2015-12-11 17:15:00	10.8	254.256	94.1042	0.6588	1.19796	1.575	12.1	0.62	143	6.57827	2.51765	0.503529
2015-12-11 17:30:00	10.8	254.163	94.0267	0.6832	1.2353	1.7388	12	0.79	177	0	2.68583	0.167864
2015-12-11 17:45:00	10.8	255.303	94.5924	0.7076	1.27263	1.7451	11.6	0.27	213	0	2.0144	0.167867
2015-12-11 18:00:00	10.8	255.315	94.6438	0.6588	1.19796	1.9341	11.5	0.79	166	0	1.34296	0.167869
2015-12-11 18:15:00	10.88	256.175	95.3533	0.5246	0.992638	1.5876	11.6	0.39	200	0	1.3431	0.335774
2015-12-11 18:30:00	10.77	254.566	94.6106	0.5368	1.0113	2.2365	10.6	0.38	205	0	1.00738	0.335794
2015-12-11 18:45:00	10.83	259.293	96.2454	0.6344	1.16063	2.1861	10.5	0.24	283	0	0.503704	0.335803
2015-12-11 19:00:00	10.89	256.253	95.0627	0.6954	1.25396	2.0034	9.8	0.37	222	0	0.671593	0.167898
2015-12-11 19:15:00	10.91	257.574	95.6216	0.6588	1.19796	1.4364	9.7	0.32	264	0	1.17545	0.167921
2015-12-11 19:30:00	10.98	258.588	96.1767	0.6954	1.25396	1.2474	9.9	0.75	288	0	1.3434	0.167926
2015-12-11 19:45:00	11.06	256.58	95.5765	0.5734	1.0673	1.3104	9.7	1.43	285	0	0.671749	0.167937
2015-12-11 20:00:00	11.02	254.34	94.7122	0.5978	1.10463	1.3671	9.5	1.21	336	0	1.00771	0.335904
2015-12-11 20:15:00	10.92	254.309	94.6371	0.5978	1.10463	1.2222	9.1	1.21	279	0	1.34367	0.167959
2015-12-11 20:30:00	10.91	253.378	93.782	0.6222	1.14197	1.1466	8.8	1.15	278	0	1.34381	0.335952
2015-12-11 20:45:00	10.91	253.375	93.7094	0.61	1.1233	1.4049	8.8	1.03	264	0	1.51183	0.167981
2015-12-11 21:00:00	10.82	253.633	93.874	0.5734	1.0673	1.1655	8.9	1.68	298	0	1.17588	0.167982
2015-12-11 21:15:00	10.65	254.329	93.8892	0.5856	1.08597	1.1529	8.6	1.55	350	0	1.17588	0.335965
2015-12-11 21:30:00	10.66	254.841	93.9249	0.5734	1.0673	1.2096	8.7	0.53	290	0	1.67982	0.335965
2015-12-11 21:45:00	10.59	255.847	94.2079	0.61	1.1233	1.1781	8.6	1.53	299	0	1.34386	0.167983
2015-12-11 22:00:00	10.67	258	95.1955	0.5246	0.992638	1.134	8.2	1.08	289	0	1.67982	0.167983
2015-12-11 22:15:00	10.78	261.704	96.9962	0.671	1.21663	1.3041	7.9	2.1	283	0	1.84781	0.335965
2015-12-11 22:30:00	10.83	264.879	98.3244	0.5612	1.04864	1.2348	8.2	1.28	319	0	2.01579	0.335965
2015-12-11 22:45:00	10.76	260.729	96.5036	0.6466	1.1793	1.2474	7.8	1.72	253	0	0.67193	0.167983
2015-12-11 23:00:00	10.72	256.999	95.074	0.6954	1.25396	1.26	7.6	1.64	331	0	0.839912	0.335965
2015-12-11 23:15:00	10.7	260.03	95.8255	0.5368	1.0113	1.134	7.5	2.06	262	0	0.503947	0.335965
2015-12-11 23:30:00	10.68	252.898	93.0368	0.549	1.02997	1.1529	7.4	2.26	265	0	0.503954	0.167985
2015-12-11 23:45:00	10.57	251.787	92.4485	0.5734	1.0673	1.1844	7.7	2.36	287	0	0.671947	0.167987
2015-12-12	10.6	253.528	93.1796	0.5734	1.0673	1.1781	7.6	2.16	257	0	0.671967	0.167992
2015-12-12 00:15:00	10.59	254.181	93.3683	0.5734	1.0673	1.1529	7.6	2.51	278	0	1.00801	0.168001
2015-12-12 00:30:00	10.63	254.487	93.5407	0.5856	1.08597	1.1781	7.6	1.99	282	0	1.00801	0.336002
2015-12-12 00:45:00	10.57	254.504	93.4824	0.5734	1.0673	1.1718	7.7	2.24	294	0	0.504042	0.336028
2015-12-12 01:00:00	10.55	254.089	93.1226	0.5978	1.10463	1.1781	7.5	2.35	276	0	0.840096	0.336039
2015-12-12 01:15:00	10.82	251.95	92.677	0.5124	0.973972	1.1466	7.2	2.31	276	0	0.504065	0.336044
2015-12-12 01:30:00	10.46	250.226	91.8432	0.4758	0.917974	1.1466	7.3	1.86	266	0	0.672065	0.336033
2015-12-12 01:45:00	10.55	250.018	91.9163	0.4758	0.917974	1.1529	7.6	1.83	278	0	0.84015	0.33606
2015-12-12 02:00:00	10.65	252.694	92.4112	0.5124	0.973972	1.1277	7.2	1.58	269	0	0.504071	0.336048
2015-12-12 02:15:00	10.86	253.544	92.6706	0.5368	1.0113	1.1529	7.4	1.54	263	0	0.672119	0.16803
2015-12-12 02:30:00	10.75	254.039	92.8676	0.5124	0.973972	1.1214	7.2	1.98	280	0	0.336063	0.168032
2015-12-12 02:45:00	10.84	252.28	92.3727	0.488	0.93664	1.1529	7.5	1.54	261	0	0.672109	0.168027
2015-12-12 03:00:00	10.8	251.845	92.5672	0.488	0.93664	1.0962	7.9	1.43	307	0	0.336051	0.336051
2015-12-12 03:15:00	10.83	251.366	92.7032	0.7076	1.27263	1.1529	7.3	0.75	230	0	0.336056	0.336056
2015-12-12 03:30:00	10.84	251.224	92.7477	0.6344	1.16063	1.1529	6.9	0.79	255	0	0.67213	0.336065
2015-12-12 03:45:00	10.82	251.336	92.7251	0.6466	1.1793	1.1466	7.1	1.17	240	0	0.504101	0.168034
2015-12-12 04:00:00	10.75	252.138	92.9525	0.61	1.1233	1.1466	7.6	2.01	274	0	0.67211	0.336055
2015-12-12 04:15:00	10.76	251.936	92.8477	0.6954	1.25396	1.1592	7.2	1.94	277	0	1.00814	0.336047
2015-12-12 04:30:00	10.79	252.172	92.9914	0.6344	1.16063	1.1151	6.9	1.36	270	0	3.36057	0.168028
2015-12-12 04:45:00	10.8	252.408	93.0783	0.6466	1.1793	1.1529	7.1	1.2	273	0	4.2007	0.336056
2015-12-12 05:00:00	10.78	251.559	92.7711	0.61	1.1233	1.134	6.8	1.06	271	0	8.23327	0.336052
2015-12-12 05:15:00	10.75	252.062	92.9624	0.6222	1.14197	1.1592	6.9	0.7	258	0	9.24155	0.336056
2015-12-12 05:30:00	10.76	251.541	92.8518	0.671	1.21663	1.2096	6.6	1.55	305	0	7.22512	0.168026
2015-12-12 05:45:00	10.8	254.272	94.1267	0.6588	1.19796	1.1277	6.4	1.26	273	0	5.71306	0.336063
2015-12-12 06:00:00	10.8	253.838	94.1945	0.488	0.93664	1.1025	6.4	1.19	300	0	5.37673	0.336045
2015-12-12 06:15:00	10.75	255.945	94.8852	0.6588	1.19796	1.1214	6.1	0.44	214	0	5.71305	0.336062
2015-12-12 06:30:00	10.94	254.31	94.5589	0.5246	0.992638	1.1214	5.6	0.52	222	0	4.87288	0.16803
2015-12-12 06:45:00	10.86	256.358	95.1614	0.5734	1.0673	1.134	5.4	0.7	205	0	4.03261	0.168025
2015-12-12 07:00:00	10.83	256.704	95.3384	0.5246	0.992638	1.1025	5.8	0.4	266	0	4.36891	0.33607
2015-12-12 07:15:00	10.82	256.871	95.3182	0.5734	1.0673	1.1088	6.2	1.34	7	0	2.68861	0.168038
2015-12-12 07:30:00	10.83	253.312	94.0071	0.549	1.02997	1.1088	6.1	1.09	263	0	2.01647	0.336078
2015-12-12 07:45:00	11.03	252.234	92.9238	0.61	1.1233	1.323	5.8	0.62	250	0	2.68862	0.168039
2015-12-12 08:00:00	11.26	250.137	92.7381	0.5734	1.0673	1.3923	5.5	0.66	280	6.58445	3.52882	0.336078
2015-12-12 08:15:00	11.54	247.975	92.2619	0.5002	0.955306	1.5624	5.6	0.98	258	19.7534	6.21744	1.34431
2015-12-12 08:30:00	11.56	248.922	92.4588	0.5002	0.955306	1.4112	5.5	0.48	231	42.7997	7.22568	3.0247
2015-12-12 08:45:00	11.52	247.101	92.4647	0.488	0.93664	1.512	6	0.79	268	69.1392	12.4349	4.87313
2015-12-12 09:00:00	11.71	247.282	91.6674	0.4758	0.917974	1.386	6.5	0.67	354	108.646	18.3163	7.72979
2015-12-12 09:15:00	11.3	247.579	92.6366	0.5246	0.992638	1.5561	6.9	0.93	285	207.411	25.3739	11.0906
2015-12-12 09:30:00	11.32	247.779	92.6547	0.549	1.02997	1.4364	7.2	1.07	312	273.255	32.2635	15.2916
2015-12-12 09:45:00	11.25	248.307	92.2603	0.5368	1.0113	1.4364	7.5	1.25	264	332.515	38.3122	19.3242
2015-12-12 10:00:00	11.57	247.589	91.7612	0.5124	0.973972	1.3671	7.7	1.18	289	279.839	42.0057	22.515
2015-12-12 10:15:00	11.48	247.652	92.3185	0.5368	1.0113	1.4049	7.8	0.98	294	391.775	49.5674	27.2201
2015-12-12 10:30:00	11.43	247.443	92.1767	0.5246	0.992638	1.5372	8.1	1.12	298	483.891	57.7888	33.0942
2015-12-12 10:45:00	11.29	248.77	92.4481	0.61	1.1233	1.3041	8.4	1	323	589.213	67.1933	39.4761
2015-12-12 11:00:00	11.36	249.04	92.5243	0.5246	0.992638	1.3293	8.6	1.11	325	602.29	72.0645	43.8435
2015-12-12 11:15:00	11.41	250.488	93.2525	0.4636	0.899308	1.3482	9.1	0.9	302	575.951	73.7443	46.1952
2015-12-12 11:30:00	11.39	254.267	94.5314	0.4636	0.899308	1.2726	9.5	1.01	319	668.102	78.7743	49.5489
2015-12-12 11:45:00	11.35	251.573	93.6914	0.488	0.93664	1.3104	10	0.87	322	707.596	83.9701	53.4049
2015-12-12 12:00:00	11.3	253.786	94.1792	0.4026	0.805978	1.2033	10.4	0.81	311	575.95	80.9411	53.5689
2015-12-12 12:15:00	11.28	255.951	95.0204	0.5124	0.973972	1.2348	10.7	0.47	334	427.849	70.1847	47.6853
2015-12-12 12:30:00	11.36	254.015	94.3997	0.5978	1.10463	1.2789	10.8	1	324	549.562	73.7099	48.6922
2015-12-12 12:45:00	11.16	254.848	94.6779	0.671	1.21663	1.2852	10.9	0.42	41	592.228	81.7666	54.0633
2015-12-12 13:00:00	11.22	258.25	95.9661	0.549	1.02997	1.2537	11	0.66	20	773.167	92.3439	60.1075
2015-12-12 13:15:00	11.08	260.238	96.4582	0.61	1.1233	1.2033	10.9	1.1	358	825.806	92.6776	58.763
2015-12-12 13:30:00	10.79	262.809	97.0405	0.488	0.93664	1.2159	10.9	1.31	353	789.615	87.8016	55.4006
2015-12-12 13:45:00	10.93	266.304	98.5606	0.5124	0.973972	1.1718	11	1.15	345	700.783	78.3957	49.8577
2015-12-12 14:00:00	10.9	271.575	100.74	0.4636	0.899308	1.197	10.9	1.03	308	391.517	64.9656	41.6317
2015-12-12 14:15:00	10.94	270.063	100.188	0.4636	0.899308	1.1781	11.2	1.02	311	463.899	64.6299	39.6173
2015-12-12 14:30:00	10.97	267.983	99.5911	0.4514	0.880642	1.1529	11.2	0.46	352	667.821	69.4981	39.953
2015-12-12 14:45:00	10.96	268.69	99.8765	0.4758	0.917974	1.2537	11.4	0.49	46	486.88	60.4303	34.5796
2015-12-12 15:00:00	10.83	269.841	100.035	0.4758	0.917974	1.1718	11.3	1.51	25	305.945	47.1706	27.5302
2015-12-12 15:15:00	10.78	265.616	98.0437	0.5124	0.973972	1.3167	11.1	0.88	5	312.507	42.6373	22.8294
2015-12-12 15:30:00	10.85	268.433	99.6071	0.4636	0.899308	1.3041	11.2	0.5	3	259.875	37.2669	19.1371
2015-12-12 15:45:00	11.03	270.162	100.511	0.488	0.93664	1.134	11.1	0.42	117	194.087	31.3912	15.4438
2015-12-12 16:00:00	11.09	270.227	100.728	0.4758	0.917974	1.1781	11.5	0.45	203	180.938	25.3479	11.5828
2015-12-12 16:15:00	11.02	271.149	100.937	0.5246	0.992638	1.1781	11.2	0.78	131	121.728	19.137	8.22557
2015-12-12 16:30:00	11.02	269.486	100.336	0.5856	1.08597	1.1592	11.1	0.8	93	85.5412	13.7653	5.37183
2015-12-12 16:45:00	10.94	268.591	99.9417	0.549	1.02997	1.1907	11	0.6	120	46.0608	8.05775	3.18952
2015-12-12 17:00:00	10.8	269.172	99.8286	0.6222	1.14197	1.1844	10.8	0.86	122	19.7404	3.86133	1.67884
2015-12-12 17:15:00	10.63	264.41	97.6184	0.6832	1.2353	1.2348	10.6	0.26	197	6.58012	1.34316	0.503686
2015-12-12 17:30:00	10.78	266.231	98.4554	0.732	1.30996	1.197	10.2	0.44	178	0	0.335795	0.335795
2015-12-12 17:45:00	10.98	265.517	98.6073	0.7076	1.27263	1.0773	10.1	0.32	141	0	0.671596	0.335798
2015-12-12 18:00:00	10.93	261.799	97.1848	0.8296	1.45929	1.1403	9.8	0.74	159	0	0.671636	0.335818
2015-12-12 18:15:00	10.89	261.313	96.9659	0.8052	1.42196	1.1907	9.7	0.11	238	0	0.335848	0.167924
2015-12-12 18:30:00	10.94	258.124	95.794	0.8296	1.45929	1.1214	9	0.44	217	0	0.503791	0.335861
2015-12-12 18:45:00	10.86	260.538	96.8487	0.7808	1.38462	1.071	8.7	0.61	191	0	0.335902	0.167951
2015-12-12 19:00:00	10.83	261.72	97.1675	0.7198	1.29129	1.0836	8.7	0.25	229	0	0.335908	0.335908
2015-12-12 19:15:00	10.89	260.472	96.628	0.8052	1.42196	1.1151	8.9	0.45	207	0	0.503911	0.16797
2015-12-12 19:30:00	10.9	258.852	96.0225	0.8296	1.45929	1.0962	9.3	0.24	333	0	0.33596	0.33596
2015-12-12 19:45:00	10.95	262.598	97.6624	0.61	1.1233	1.0584	9.3	0.1	224	0	0.503947	0.167982
2015-12-12 20:00:00	10.82	263.744	97.7168	0.854	1.49662	1.071	9.3	0.57	5	0	0.503947	0.167983
2015-12-12 20:15:00	10.89	259.569	95.9093	0.7198	1.29129	1.071	9.2	1.04	350	0	0.503947	0.167983
2015-12-12 20:30:00	11.11	256.674	95.4021	0.7076	1.27263	1.26	9.2	0.23	333	0	0.335965	0.335965
2015-12-12 20:45:00	10.79	256.746	95.4248	0.7442	1.32863	1.3797	9.3	0.17	245	0	0.503947	0.335965
2015-12-12 21:00:00	10.87	262.5	96.9826	0.671	1.21663	1.1214	9.5	0.67	285	0	0.335965	0.335965
2015-12-12 21:15:00	11.04	256.691	95.2317	0.61	1.1233	1.1844	9.4	0.91	338	0	0.167983	0.167983
2015-12-12 21:30:00	11	255.463	94.4181	0.671	1.21663	1.1403	9.6	0.42	21	0	0.335965	0.335965
2015-12-12 21:45:00	10.81	252.601	93.3197	0.732	1.30996	1.134	9.9	0.65	307	0	0.335965	0.167983
2015-12-12 22:00:00	10.87	257.449	95.3015	0.6588	1.19796	1.1844	9.7	0.51	201	0	0.335965	0.167983
2015-12-12 22:15:00	10.55	265.624	97.4635	0.793	1.40329	1.0899	10.1	2.48	97	0	0.503947	0.335965
2015-12-12 22:30:00	10.54	265.605	97.169	0.6588	1.19796	1.0773	10	4.87	70	0	0.503947	0.335965
2015-12-12 22:45:00	10.75	258.93	95.285	0.5368	1.0113	1.1025	10	4.17	75	0	0.335965	0.167983
2015-12-12 23:00:00	10.94	271.597	100.359	0.7808	1.38462	1.1718	10.2	3.56	77	0	0.335965	0.335965
2015-12-12 23:15:00	11.04	282.761	104.977	0.6344	1.16063	1.0962	10.6	3.92	76	0	0.67193	0.335965
2015-12-12 23:30:00	10.99	276.903	102.707	0.7198	1.29129	1.1907	10.6	3.49	73	0	0.335965	0.167983
2015-12-12 23:45:00	11	266.658	99.0624	0.5368	1.0113	1.0269	10.2	2.84	86	0	0.167983	0.167983
2015-12-13	10.98	265.607	98.3364	0.7076	1.27263	1.1529	10.2	3.45	67	0	0.335965	0.335965
2015-12-13 00:15:00	10.98	270.643	100.258	0.6954	1.25396	1.1655	10.2	5.1	65	0	0	0.335964
2015-12-13 00:30:00	11.02	264.299	97.8096	0.732	1.30996	1.1655	10.2	5.17	64	0	0.503947	0.335965
2015-12-13 00:45:00	10.95	261.631	96.8321	0.5734	1.0673	1.1214	10.3	4.8	82	0	0.503947	0.335965
2015-12-13 01:00:00	10.95	262.374	96.9217	0.549	1.02997	1.1151	10.3	5.05	71	0	0	0.335964
2015-12-13 01:15:00	10.91	259.727	95.8934	0.6344	1.16063	1.1214	10.2	7.95	89	0	0	0.335965
2015-12-13 01:30:00	10.89	258.038	95.2539	0.7564	1.34729	1.1403	10.2	6.33	86	0	0.503947	0.335965
2015-12-13 01:45:00	10.85	257.956	95.0923	0.7076	1.27263	1.1529	10.2	5.3	88	0	0.335965	0.335965
2015-12-13 02:00:00	10.83	257.648	94.9271	0.7198	1.29129	1.1151	10.4	5.71	82	0	0.167982	0.335963
2015-12-13 02:15:00	10.91	258.012	95.1896	0.7076	1.27263	1.1277	10.4	5.13	95	0	0.167982	0.335965
2015-12-13 02:30:00	10.87	257.673	95.1122	0.6588	1.19796	1.197	10.2	5.65	97	0	0.503946	0.335964
2015-12-13 02:45:00	10.85	257.746	95.0735	0.6588	1.19796	1.1844	10.3	4.2	81	0	0.167983	0.335965
2015-12-13 03:00:00	10.88	257.219	95.0209	0.671	1.21663	1.134	10.1	5.28	92	0	0	0.335965
2015-12-13 03:15:00	10.86	256.117	94.5686	0.7442	1.32863	1.1592	10	4.33	85	0	0.335965	0.167983
2015-12-13 03:30:00	10.83	257.031	94.8878	0.7808	1.38462	1.1277	10.1	1.81	79	0	0.335965	0.167983
2015-12-13 03:45:00	10.83	256.525	94.6735	0.7442	1.32863	1.134	10.2	3.79	70	0	0.167983	0.335965
2015-12-13 04:00:00	10.82	256.66	94.7158	0.732	1.30996	1.1529	10	0.9	4	0	0.167983	0.335965
2015-12-13 04:15:00	10.84	256.232	94.5894	0.7198	1.29129	1.1529	9.6	1.71	6	0	0	0.335965
2015-12-13 04:30:00	10.86	255.946	94.5773	0.7686	1.36596	1.1466	9.8	1.66	359	0	0.335965	0.335965
2015-12-13 04:45:00	10.79	257.944	95.2005	0.7808	1.38462	1.134	9.8	2.13	1	0	0.167983	0.335965
2015-12-13 05:00:00	10.79	257.227	94.9497	0.732	1.30996	1.1214	9.7	1.54	16	0	0.167983	0.335965
2015-12-13 05:15:00	10.8	257.264	94.9873	0.7442	1.32863	1.134	9.7	1.19	19	0	0.167983	0.335965
2015-12-13 05:30:00	10.81	256.703	94.8002	0.6954	1.25396	1.1529	9.5	1.87	55	0	0.167983	0.167983
2015-12-13 05:45:00	10.79	256.485	94.7017	0.6588	1.19796	1.1025	9.6	1.49	76	0	0.167983	0.335965
2015-12-13 06:00:00	10.73	254.837	93.9289	0.671	1.21663	1.0962	9.6	3.02	49	0	0.167983	0.335965
2015-12-13 06:15:00	10.75	258.691	95.6147	0.854	1.49662	1.134	9.5	0.47	31	0	0	0.335965
2015-12-13 06:30:00	10.73	256.303	94.496	0.6954	1.25396	1.0836	9.4	2.39	94	0	0.167983	0.167983
2015-12-13 06:45:00	10.81	257.581	95.0473	0.7442	1.32863	1.0773	9.4	0.55	13	0	0	0.167983
2015-12-13 07:00:00	10.81	256.351	94.816	0.671	1.21663	1.1088	9.4	0.95	84	0	0	0.335965
2015-12-13 07:15:00	10.78	256.512	94.7493	0.7198	1.29129	1.0899	9.3	1.83	80	0	0	0.335965
2015-12-13 07:30:00	10.8	255.373	94.398	0.7076	1.27263	1.134	9.4	1.78	70	0	0.167983	0.167983
2015-12-13 07:45:00	10.9	256.016	94.4147	0.732	1.30996	1.134	9.5	2.63	81	0	0.503947	0.167983
2015-12-13 08:00:00	11.2	251.831	93.1919	0.6832	1.2353	1.3923	9.3	0.69	90	6.58232	0.503947	0.335965
2015-12-13 08:15:00	11.4	250.752	92.9288	0.6344	1.16063	1.3923	9.3	1.12	56	13.1652	3.19167	1.34386
2015-12-13 08:30:00	11.35	249.915	93.0561	0.6466	1.1793	1.4805	9.3	2.48	84	36.2054	6.04737	2.51974
2015-12-13 08:45:00	11.33	248.068	92.1444	0.6832	1.2353	1.5687	9.4	1.57	128	82.2842	12.2627	4.87149
2015-12-13 09:00:00	11.57	250.684	93.0203	0.671	1.21663	1.4742	9.4	0.84	89	128.374	18.982	8.06316
2015-12-13 09:15:00	11.6	250.606	93.2776	0.7442	1.32863	1.7199	9.8	1.87	96	207.352	26.3732	11.7588
2015-12-13 09:30:00	11.5	248.72	92.3264	0.6954	1.25396	1.6191	9.9	1.65	85	181.018	31.0768	14.9504
2015-12-13 09:45:00	11.52	250.111	93.3419	0.793	1.40329	1.7262	10.4	0.87	85	371.9	39.3079	19.318
2015-12-13 10:00:00	11.51	250.137	93.1441	0.793	1.40329	1.512	10.2	1.45	90	207.342	37.7961	20.1579
2015-12-13 10:15:00	11.58	250.05	93.2607	0.8052	1.42196	1.5498	10.5	3.31	54	273.165	34.6044	18.4781
2015-12-13 10:30:00	11.7	250.892	93.4161	0.7686	1.36596	1.575	10.8	0.32	156	283.038	42.8342	24.5247
2015-12-13 10:45:00	11.69	251.942	93.7425	0.8052	1.42196	1.6569	10.9	1.53	86	273.165	42.3257	24.8579
2015-12-13 11:00:00	11.66	252.02	93.6153	0.854	1.49662	1.5435	11.1	2.38	105	332.406	47.1953	28.3844
2015-12-13 11:15:00	11.7	251.648	93.6056	0.8174	1.44062	1.3608	11.2	1.87	101	240.254	35.9423	22.002
2015-12-13 11:30:00	11.58	251.888	93.8736	0.8174	1.44062	1.3419	11.3	2.44	88	338.988	52.4	33.4218
2015-12-13 11:45:00	11.52	253.029	94.2028	0.8906	1.55262	1.3167	11.5	2.25	92	358.735	59.9527	38.9609
2015-12-13 12:00:00	11.6	255.026	94.9976	0.9272	1.60862	1.7577	11.6	2.69	83	332.406	47.1882	29.8915
2015-12-13 12:15:00	11.55	257.167	95.7358	0.7686	1.36596	1.2978	11.7	2.73	89	431.14	61.2932	39.6307
2015-12-13 12:30:00	11.5	255.03	94.9622	0.793	1.40329	1.2978	11.9	3.04	74	444.304	64.4836	41.9815
2015-12-13 12:45:00	11.42	255.826	95.2376	0.7442	1.32863	1.2852	12	3.36	91	378.482	59.9496	38.9589
2015-12-13 13:00:00	11.43	255.891	95.1706	0.9028	1.57128	1.3923	12.1	4.03	105	470.617	74.3894	47.354
2015-12-13 13:15:00	11.4	256.615	95.4995	0.7686	1.36596	1.3482	12.3	3.54	98	799.734	87.9839	52.8911
2015-12-13 13:30:00	11.36	256.508	95.4919	0.671	1.21663	1.3293	12.4	3.32	92	789.873	90.4982	54.2318
2015-12-13 13:45:00	11.3	259.128	96.3528	0.7686	1.36596	1.2474	12.6	4.06	107	496.928	78.9145	47.3487
2015-12-13 14:00:00	11.2	258.739	96.1541	0.5856	1.08597	1.26	12.7	3.4	92	766.776	83.2788	46.3406
2015-12-13 14:15:00	11.23	260.775	96.8427	0.6466	1.1793	1.2285	12.7	3.72	93	628.51	76.7295	41.6388
2015-12-13 14:30:00	11.21	267.956	99.5476	0.9272	1.60862	1.1529	12.7	4.07	82	411.265	70.3493	38.1128
2015-12-13 14:45:00	11.07	269.519	100.084	0.732	1.30996	1.0836	12.7	3.53	96	378.358	63.1296	33.2438
2015-12-13 15:00:00	11.11	267.53	99.4835	0.8052	1.42196	1.1592	12.9	3.77	96	483.639	55.5742	28.2069
2015-12-13 15:15:00	11.11	269.887	100.259	0.854	1.49662	1.1844	12.9	3.14	101	384.937	42.4782	19.4762
2015-12-13 15:30:00	11.12	271.438	100.933	0.6832	1.2353	1.1655	12.8	1.88	146	174.373	38.2805	17.7971
2015-12-13 15:45:00	11.1	270.776	100.566	0.7808	1.38462	1.1466	12.8	1.3	182	164.503	34.4187	14.6069
2015-12-13 16:00:00	11.11	269.884	100.214	0.8052	1.42196	1.2033	12.6	0.9	125	148.053	29.55	11.417
2015-12-13 16:15:00	11.11	269.821	100.293	0.7076	1.27263	1.0962	12.5	1.75	111	154.633	24.3452	8.3949
2015-12-13 16:30:00	11.13	271.162	100.783	0.6466	1.1793	1.1403	12.4	0.7	105	95.4118	17.7972	5.37273
2015-12-13 16:45:00	11.09	270.404	100.503	0.671	1.21663	1.1592	12	1.32	69	52.641	10.7455	3.35796
2015-12-13 17:00:00	11.06	270.583	100.505	0.793	1.40329	1.0962	11.5	0.34	203	26.3205	6.38012	1.67898
2015-12-13 17:15:00	11.09	270.934	100.564	0.8418	1.47795	1.2537	11.2	0.14	2	6.58024	3.86165	0.503694
2015-12-13 17:30:00	11.02	271.615	100.919	0.8418	1.47795	1.1277	10.8	0.09	167	0	3.35796	0.335796
2015-12-13 17:45:00	10.88	267.422	99.1904	1.0248	1.75794	1.1403	10.6	0.31	196	0	2.85431	0.335801
2015-12-13 18:00:00	10.88	265.186	98.2245	1.0126	1.73928	1.1529	10.4	0.38	260	0	2.85427	0.335796
2015-12-13 18:15:00	10.89	264.749	98.1142	1.0004	1.72061	1.1214	9.9	0.16	221	0	3.52616	0.167912
2015-12-13 18:30:00	10.88	265.419	98.3894	1.0126	1.73928	1.1655	9.7	0.53	216	0	3.3585	0.33585
2015-12-13 18:45:00	10.86	266.518	98.767	0.976	1.68328	1.2789	9.6	0.27	173	0	3.35867	0.167933
2015-12-13 19:00:00	10.86	267.141	99.0166	1.0858	1.85127	1.134	9.4	0.23	162	0	2.51918	0.33589
2015-12-13 19:15:00	10.84	262.912	97.8	0.8296	1.45929	1.0773	9.8	0.49	147	0	2.68725	0.335907
2015-12-13 19:30:00	10.79	263.649	97.926	0.6832	1.2353	1.0458	9.7	0.47	205	0	2.35152	0.335932
2015-12-13 19:45:00	10.9	266.105	98.7105	0.7686	1.36596	1.0647	9.5	0.37	210	0	2.68765	0.167978
2015-12-13 20:00:00	10.96	266.584	98.7728	0.8174	1.44062	1.0458	9.9	0.27	160	0	2.18377	0.167982
2015-12-13 20:15:00	10.97	264.824	98.476	0.732	1.30996	1.0647	10.1	0.43	198	0	1.51184	0.335965
2015-12-13 20:30:00	10.99	270.161	100.315	0.8662	1.51529	1.1466	10.3	0.59	211	0	1.34386	0.335965
2015-12-13 20:45:00	11.05	265.871	98.6751	0.793	1.40329	1.1025	10.7	0.32	220	0	1.34386	0.167983
2015-12-13 21:00:00	11.02	263.558	97.8517	0.7686	1.36596	1.1151	10.7	0.86	342	0	1.51184	0.335965
2015-12-13 21:15:00	11.12	263.734	97.9053	0.7808	1.38462	1.0773	10.7	0.65	335	0	1.51184	0.167983
2015-12-13 21:30:00	11.16	264.727	98.3221	0.8784	1.53395	1.0836	10.7	0.58	326	0	1.34386	0.335965
2015-12-13 21:45:00	11.18	265.827	98.7389	0.8662	1.51529	1.0773	10.9	0.71	332	0	1.84781	0.335965
2015-12-13 22:00:00	11.22	265.868	98.9027	0.8174	1.44062	1.1088	10.7	0.23	295	0	1.67982	0.167983
2015-12-13 22:15:00	11.23	267.725	99.5134	0.8418	1.47795	1.1088	10.8	0.52	271	0	2.01579	0.167983
2015-12-13 22:30:00	11.29	273.054	101.359	0.7198	1.29129	1.1214	10.8	0.72	292	0	2.01578	0.167982
2015-12-13 22:45:00	11.26	276.699	102.987	0.732	1.30996	1.1466	10.8	0.83	287	0	2.01573	0.167978
2015-12-13 23:00:00	11.25	279.521	104.086	0.8174	1.44062	1.1277	10.5	0.33	223	0	2.1837	0.335953
2015-12-13 23:15:00	11.32	273.286	101.711	0.7198	1.29129	1.0647	10.6	0.56	246	0	2.35166	0.167976
2015-12-13 23:30:00	11.21	269.656	100.49	0.7442	1.32863	1.0899	10.9	0.52	289	0	2.51961	0.335948
2015-12-13 23:45:00	11.04	267.824	99.4764	0.854	1.49662	1.1025	10.6	0.91	214	0	2.35166	0.335951
2015-12-14	10.99	265.21	98.3769	0.793	1.40329	1.0584	11	1.6	99	0	1.67973	0.167973
2015-12-14 00:15:00	10.98	265.701	98.5876	0.8784	1.53395	1.0773	11.3	1.64	70	0	2.35165	0.167975
2015-12-14 00:30:00	10.97	265.087	98.3741	1.037	1.77661	1.1466	11.3	1.35	101	0	2.3516	0.335943
2015-12-14 00:45:00	11.11	268.501	99.6294	0.854	1.49662	1.0899	11.3	1.43	95	0	2.85558	0.335951
2015-12-14 01:00:00	11.12	268.416	99.62	0.9638	1.66461	1.1025	11.3	0.97	109	0	2.18358	0.335936
2015-12-14 01:15:00	11.22	272.604	100.886	0.9028	1.57128	1.0773	11.3	0.66	79	0	2.51938	0.335917
2015-12-14 01:30:00	11.05	274.515	101.774	0.8906	1.55262	1.0773	11.3	0.62	301	0	1.67956	0.335913
2015-12-14 01:45:00	11.02	273.964	101.354	1.0248	1.75794	1.1403	11.2	0.21	184	0	2.35138	0.167956
2015-12-14 02:00:00	11.02	279.578	103.416	0.8296	1.45929	1.0899	11	0.59	358	0	2.01547	0.335911
2015-12-14 02:15:00	11.03	263.158	97.2872	0.976	1.68328	1.1403	10.9	0.5	219	0	2.51936	0.335915
2015-12-14 02:30:00	11.04	261.525	96.6914	0.8418	1.47795	1.1025	11.1	0.11	50	0	2.68728	0.335909
2015-12-14 02:45:00	11.16	280.429	104.147	0.8906	1.55262	1.1151	11.3	0.25	147	0	2.35136	0.335909
2015-12-14 03:00:00	11.1	274.533	101.848	0.9516	1.64595	1.1844	11.3	1.73	133	0	3.02319	0.33591
2015-12-14 03:15:00	11.12	277.703	103.098	0.9272	1.60862	1.1214	11.3	1.67	102	0	2.85522	0.167954
2015-12-14 03:30:00	11.07	275.863	102.266	0.5978	1.10463	1.0836	11.1	1.39	116	0	2.35136	0.167954
2015-12-14 03:45:00	11.18	284.381	105.796	0.7076	1.27263	1.0962	11	1.91	100	0	2.68727	0.335909
2015-12-14 04:00:00	11.17	287.78	107.024	0.6832	1.2353	1.0836	10.9	1.56	86	0	2.01545	0.335909
2015-12-14 04:15:00	11.16	285.092	105.976	0.7076	1.27263	1.071	10.9	1.17	103	0	1.67954	0.167954
2015-12-14 04:30:00	11.23	285.396	106.205	0.7198	1.29129	1.0773	10.9	1.65	69	0	2.01546	0.33591
2015-12-14 04:45:00	11.18	281.065	104.605	0.732	1.30996	1.0647	10.9	0.6	139	0	1.8475	0.335909
2015-12-14 05:00:00	11.17	282.167	104.931	0.793	1.40329	1.071	11	0.6	286	0	2.01545	0.167954
2015-12-14 05:15:00	11.17	274.504	102.098	0.6832	1.2353	1.0773	10.9	1.43	54	0	2.01545	0.335909
2015-12-14 05:30:00	11.16	286.14	106.422	0.8662	1.51529	1.0899	10.9	1.72	101	0	1.8475	0.167955
2015-12-14 05:45:00	11.08	275.342	102.191	0.976	1.68328	1.1214	10.9	0.08	60	0	1.67954	0.167954
2015-12-14 06:00:00	11.1	276.906	102.804	1.0248	1.75794	1.1529	10.9	0.88	58	0	1.00773	0.167954
2015-12-14 06:15:00	11.1	277.284	102.944	0.9272	1.60862	1.2348	10.8	1.2	76	0	1.00773	0.335909
2015-12-14 06:30:00	11.11	279.351	103.761	1.1224	1.90727	1.1592	10.8	0.8	90	0	0.335909	0.335909
2015-12-14 06:45:00	11.13	273.773	101.65	0.854	1.49662	1.134	10.8	1.24	103	0	1.00773	0.335909
2015-12-14 07:00:00	11.13	272.83	101.269	0.7564	1.34729	1.0836	10.7	1.37	120	0	0.671817	0.335909
2015-12-14 07:15:00	11.04	272.94	101.502	0.8784	1.53395	1.1466	10.7	1.92	104	0	0.503863	0.167954
2015-12-14 07:30:00	11.05	278.347	103.612	0.7808	1.38462	1.0647	10.6	0.11	148	0	0.335909	0.335909
2015-12-14 07:45:00	10.88	268.238	99.6191	0.8784	1.53395	1.0647	10.5	0.44	59	0	0.671838	0.335919
2015-12-14 08:00:00	11.14	265.849	98.4683	0.7564	1.34729	1.0584	10.6	0.99	119	0	1.00774	0.335913
2015-12-14 08:15:00	11.2	285.883	106.686	0.6588	1.19796	1.1151	10.6	0.49	124	13.1646	2.0155	0.839793
2015-12-14 08:30:00	11.23	281.962	105.12	0.6344	1.16063	1.0962	10.5	0.15	144	36.2026	7.0543	2.85531
2015-12-14 08:45:00	11.12	262.053	97.0102	0.7076	1.27263	1.0395	10.6	1.41	70	42.7848	8.90184	3.6951
2015-12-14 09:00:00	11.32	269.408	100.349	0.6466	1.1793	1.1592	10.6	0.55	188	88.8608	16.629	7.2227
2015-12-14 09:15:00	11.48	258.912	96.5218	0.6832	1.2353	1.2978	10.7	1.42	73	131.646	18.1409	7.89466
2015-12-14 09:30:00	11.55	255.047	95.2629	0.7076	1.27263	1.4364	10.8	0.94	78	108.608	18.4763	8.90222
2015-12-14 09:45:00	11.63	253.636	94.6883	0.732	1.30996	1.4238	11	0.56	93	148.101	26.0344	13.2691
2015-12-14 10:00:00	11.76	250.74	93.7464	0.732	1.30996	1.386	11.1	0.68	116	148.101	27.8817	14.7807
2015-12-14 10:15:00	11.74	250.393	93.8161	0.8052	1.42196	1.512	11.2	0.69	92	213.924	39.6378	21.8344
2015-12-14 10:30:00	11.89	250.903	94.1786	0.8418	1.47795	1.512	11.5	1.19	104	273.165	49.0429	27.8805
2015-12-14 10:45:00	11.72	257.789	96.3042	0.793	1.40329	2.142	11.6	1.76	102	167.848	52.0659	31.7434
2015-12-14 11:00:00	11.65	258.839	96.9988	0.8418	1.47795	1.323	11.9	1.22	111	437.722	67.6828	40.6433
2015-12-14 11:15:00	11.69	259.384	96.7993	0.8296	1.45929	1.3419	12.2	1.28	82	602.279	77.2502	47.0218
2015-12-14 11:30:00	11.66	257.251	96.504	0.7564	1.34729	1.2978	12.3	0.38	72	513.418	76.4068	47.8592
2015-12-14 11:45:00	11.74	256.766	96.336	0.7686	1.36596	1.4112	12.3	0.29	26	595.677	80.6046	51.2175
2015-12-14 12:00:00	11.57	261.666	97.7678	0.8174	1.44062	1.2663	12.3	0.5	352	697.678	84.2888	53.3941
2015-12-14 12:15:00	11.54	260.35	97.3903	0.7808	1.38462	1.3293	12.8	1.94	90	832.479	93.6883	59.1009
2015-12-14 12:30:00	11.54	268.108	100.062	0.793	1.40329	1.1655	13.6	4.18	100	802.784	95.3662	60.6112
2015-12-14 12:45:00	11.52	263.331	98.4858	0.8296	1.45929	1.1592	13.7	1.82	161	411.258	77.5602	52.0425
2015-12-14 13:00:00	11.52	263.768	98.5718	0.915	1.58995	1.2222	13.6	2.41	106	352.037	58.7548	38.2745
2015-12-14 13:15:00	11.49	262.956	98.3151	0.915	1.58995	1.26	13.7	2.76	113	549.44	75.2057	47.1714
2015-12-14 13:30:00	11.42	266.773	99.4758	0.6832	1.2353	1.1529	13.7	2.22	109	740.259	84.7742	53.0469
2015-12-14 13:45:00	11.5	264.07	98.6206	1.0858	1.85127	1.2852	13.7	1.92	125	342.166	64.1263	41.1281
2015-12-14 14:00:00	11.49	264.07	98.777	1.2444	2.09393	1.2915	13.8	3.2	100	358.609	61.7745	39.2805
2015-12-14 14:15:00	11.49	264.057	98.7478	0.7442	1.32863	1.3104	13.7	2.92	104	292.802	42.9746	26.1876
2015-12-14 14:30:00	11.51	259.541	97.2098	0.8296	1.45929	1.26	13.8	2.51	109	233.593	41.9674	25.5162
2015-12-14 14:45:00	11.38	264.547	98.915	0.8296	1.45929	1.197	13.8	2.41	89	194.113	33.5739	20.1444
2015-12-14 15:00:00	11.08	265.38	98.7787	0.976	1.68328	1.3356	13.5	2.99	92	233.594	36.9313	20.8158
2015-12-14 15:15:00	11.41	263.182	98.3335	1.0492	1.79528	1.1655	13.5	3.22	99	243.464	35.7562	19.4729
2015-12-14 15:30:00	11.38	262.597	97.9593	1.0492	1.79528	1.2096	13.6	2.76	88	187.533	25.6842	12.926
2015-12-14 15:45:00	11.39	262.905	98.0765	1.0126	1.73928	1.1655	13.6	3.1	93	174.373	23.5038	11.584
2015-12-14 16:00:00	11.39	263.926	98.4736	0.9516	1.64595	1.2096	13.4	2.72	95	138.183	18.9716	8.89819
2015-12-14 16:15:00	11.42	263.085	98.2007	1.0004	1.72061	1.1403	13.5	2.82	88	82.2515	11.0812	5.03691
2015-12-14 16:30:00	11.44	262.111	97.9894	0.5002	0.955306	1.0836	13.5	3.36	82	59.2211	8.0591	3.69375
2015-12-14 16:45:00	11.45	263.777	98.6824	0.8296	1.45929	1.134	13.7	2.86	91	39.4807	5.37273	2.51847
2015-12-14 17:00:00	11.41	264.568	98.9977	0.915	1.58995	1.1592	13.5	2.03	103	16.4508	2.51847	1.00739
2015-12-14 17:15:00	11.4	265.124	99.2637	1.0492	1.79528	1.1718	14	1.75	131	3.29014	0.671592	0.335796
2015-12-14 17:30:00	11.37	266.529	99.6963	1.0858	1.85127	1.1277	14.1	1.22	125	0	0.335796	0.335796
2015-12-14 17:45:00	11.36	265.221	99.179	1.1834	2.0006	1.197	14.2	1.86	166	0	0.335796	0.335796
2015-12-14 18:00:00	11.31	268.119	100.154	1.159	1.96327	1.2159	14.1	1.2	127	0	0.503696	0.167899
2015-12-14 18:15:00	11.31	267.049	99.6885	1.2078	2.03793	1.2222	14	1.54	105	0	0.1679	0.1679
2015-12-14 18:30:00	11.37	263.295	98.3977	1.22	2.0566	1.1466	13.9	0.87	100	0	0.1679	0.1679
2015-12-14 18:45:00	11.29	264.763	98.9079	1.2444	2.09393	1.5498	14	1.58	109	0	0	0.335809
2015-12-14 19:00:00	11.29	261.771	97.8509	1.1712	1.98194	1.3923	14	1.63	71	0	0.167903	0.167903
2015-12-14 19:15:00	11.21	268.814	100.27	1.098	1.86994	1.4112	12.9	1.76	76	0	0.1679	0.1679
2015-12-14 19:30:00	11.14	263.769	98.2995	1.281	2.14993	1.6506	12.7	1.46	120	0	0.167899	0.167899
2015-12-14 19:45:00	11.11	264.624	98.5696	1.3542	2.26193	1.1403	12.9	2.21	89	0	0.167898	0.335796
2015-12-14 20:00:00	11.07	262.989	97.8779	1.3664	2.28059	1.2474	12.8	1.83	80	0	0.167898	0.167898
2015-12-14 20:15:00	11.21	263.15	97.8646	1.2566	2.1126	1.1151	12.8	1.58	128	0	0	0.335796
2015-12-14 20:30:00	11.2	261.923	97.5358	1.159	1.96327	1.2348	13.1	2.01	92	0	0	0.335797
2015-12-14 20:45:00	11.13	262.409	97.7693	1.0248	1.75794	1.2159	13	2.63	97	0	0	0.335805
2015-12-14 21:00:00	11.15	263.661	98.0903	1.0126	1.73928	1.1529	12.6	2.35	94	0	0	0.167907
2015-12-14 21:15:00	11.12	263.561	98.2051	1.0614	1.81394	1.1781	12.6	1.73	124	0	0	0.335824
2015-12-14 21:30:00	11.12	264.492	98.4923	1.1956	2.01927	1.2852	12.9	0.61	99	0	0.167909	0.335817
2015-12-14 21:45:00	11.16	260.641	97.3002	1.1468	1.9446	1.4238	12.6	1.03	85	0	0	0.167922
2015-12-14 22:00:00	11.19	260.918	97.3871	1.0614	1.81394	1.3041	12.6	1.11	281	0	0	0.167922
2015-12-14 22:15:00	11.23	263.852	98.574	1.0614	1.81394	1.575	13.2	1.99	102	0	0.167923	0.167923
2015-12-14 22:30:00	11.22	262.822	98.2087	1.0126	1.73928	1.3104	13	1.26	101	0	0	0.335852
2015-12-14 22:45:00	11.29	262.912	98.2762	0.8906	1.55262	1.1718	12.8	1.32	126	0	0	0.335852
2015-12-14 23:00:00	11.34	263.225	98.3993	1.0126	1.73928	1.3482	12.5	4.27	96	0	0	0.33585
2015-12-14 23:15:00	11.33	261.023	97.6647	0.793	1.40329	1.134	12.3	4.5	81	0	0	0.335852
2015-12-14 23:30:00	11.42	264.01	98.5979	0.8906	1.55262	1.0962	12.2	3.66	93	0	0.167926	0.167926
2015-12-14 23:45:00	11.43	261.198	97.6447	0.9516	1.64595	1.1151	12.3	3.03	98	0	0	0.335846
2015-12-15	11.43	260.508	97.3731	0.8906	1.55262	1.071	12.2	1.22	144	0	0.167925	0.33585
2015-12-15 00:15:00	11.42	264.06	98.6988	0.8174	1.44062	1.134	12.3	1.9	216	0	0	0.335852
2015-12-15 00:30:00	11.44	271.641	101.512	0.8174	1.44062	1.1214	12.5	1.27	160	0	0.167926	0.335852
2015-12-15 00:45:00	11.41	265.81	99.3934	0.9272	1.60862	1.0773	12.3	0.78	46	0	0	0.335852
2015-12-15 01:00:00	11.41	262.01	97.868	1.0248	1.75794	1.1088	12	0.7	137	0	0	0.167926
2015-12-15 01:15:00	11.34	261.962	97.8631	1.098	1.86994	1.1151	11.9	2.78	94	0	0.335852	0.335852
2015-12-15 01:30:00	11.31	261.133	97.4722	1.1956	2.01927	1.1214	11.9	1.41	118	0	0	0.335852
2015-12-15 01:45:00	11.29	263.174	98.2493	1.2078	2.03793	1.1529	12	1.25	256	0	0	0.335852
2015-12-15 02:00:00	11.3	263.423	98.4129	1.1102	1.88861	1.1592	11.9	0.91	53	0	0	0.167926
2015-12-15 02:15:00	11.28	262.521	97.9633	1.1834	2.0006	1.134	11.9	1.23	99	0	0.167926	0.167926
2015-12-15 02:30:00	11.26	262.778	98.0728	1.1346	1.92594	1.1907	11.8	1.83	77	0	0	0.167926
2015-12-15 02:45:00	11.27	262.998	98.1514	1.1956	2.01927	1.1529	11.8	0.84	79	0	0	0.335852
2015-12-15 03:00:00	11.26	263.596	98.4181	1.0736	1.83261	1.1529	11.8	2.81	43	0	0.167926	0.335852
2015-12-15 03:15:00	11.24	262.864	98.1572	0.9394	1.62728	1.1592	11.6	1.65	47	0	0	0.167928
2015-12-15 03:30:00	11.25	262.309	97.8825	1.0004	1.72061	1.1466	11.6	1.72	79	0	0	0.335857
2015-12-15 03:45:00	11.3	261.744	97.729	0.9882	1.70195	1.1592	11.6	0.72	298	0	0	0.335853
2015-12-15 04:00:00	11.35	265.281	99.1772	1.037	1.77661	1.134	11.5	1.78	70	0	0	0.335857
2015-12-15 04:15:00	11.32	265.46	99.2485	1.1346	1.92594	1.1151	11.6	1.53	75	0	0.335867	0.167934
2015-12-15 04:30:00	11.29	264.637	98.9308	0.9638	1.66461	1.1781	11.4	2.87	78	0	0.167931	0.335861
2015-12-15 04:45:00	11.29	267.876	100.132	1.0492	1.79528	1.1592	11.4	0.31	176	0	0.167932	0.335865
2015-12-15 05:00:00	11.18	263.551	98.2729	0.915	1.58995	1.1025	11.4	1.6	115	0	0.335863	0.335863
2015-12-15 05:15:00	11.19	262.404	97.8611	0.976	1.68328	1.1466	11.3	0.74	43	0	0	0.335872
2015-12-15 05:30:00	11.32	260.541	97.191	1.0004	1.72061	1.1466	11.5	1.46	76	0	0	0.335868
2015-12-15 05:45:00	11.41	277.399	103.876	0.854	1.49662	1.0773	11.5	0.28	331	0	0.335879	0.335879
2015-12-15 06:00:00	11.48	281.386	105.598	0.8906	1.55262	1.0521	11.4	0.83	344	0	0.335886	0.335886
2015-12-15 06:15:00	11.48	282.606	106.043	1.0248	1.75794	1.071	11.3	0.94	312	0	0	0.167946
2015-12-15 06:30:00	11.19	266.228	99.2585	0.9272	1.60862	1.0647	11.2	2.26	349	0	0.167948	0.167948
2015-12-15 06:45:00	11.19	264.775	98.7311	0.9394	1.62728	1.0584	11.2	1.28	45	0	0.167941	0.335883
2015-12-15 07:00:00	11.2	263.53	98.2466	0.8052	1.42196	1.0269	11.3	1.76	5	0	0	0.335894
2015-12-15 07:15:00	11.23	265.648	99.1437	1.0248	1.75794	1.0836	11.3	1.11	57	0	0	0.335896
2015-12-15 07:30:00	11.25	265.489	99.051	0.854	1.49662	1.0647	11.4	2	29	0	0	0.335901
2015-12-15 07:45:00	11.15	265.689	99.0909	0.9638	1.66461	1.071	11.5	0.79	65	0	0.335896	0.335896
2015-12-15 08:00:00	11.29	263.26	98.0706	0.854	1.49662	1.0521	11.4	0.63	10	0	0.503841	0.335894
2015-12-15 08:15:00	11.3	258.233	96.3821	1.0248	1.75794	1.0773	11.5	0.16	24	6.58228	0.83974	0.671792
2015-12-15 08:30:00	11.25	263.14	98.0905	0.8052	1.42196	1.0899	11.6	0.31	129	13.1646	3.19103	1.34359
2015-12-15 08:45:00	11.15	261.558	97.4282	0.8418	1.47795	1.0899	11.8	0.57	49	26.3291	4.03076	1.84743
2015-12-15 09:00:00	11.2	261.831	97.4303	0.7808	1.38462	1.0647	11.6	2.37	36	13.1646	1.84742	1.00768
2015-12-15 09:15:00	11.28	266.353	99.393	0.7686	1.36596	1.1466	11.9	0.43	119	42.7848	8.56537	4.03076
2015-12-15 09:30:00	11.38	270.645	101.265	0.7076	1.27263	1.0899	12	1.88	115	88.8608	14.1074	7.22166
2015-12-15 09:45:00	11.42	275.16	102.961	0.61	1.1233	1.0584	12	2.01	320	62.5317	9.57258	5.0382
2015-12-15 10:00:00	11.48	257.943	96.4896	0.7564	1.34729	1.1529	11.9	3.26	55	128.355	18.4727	10.076
2015-12-15 10:15:00	11.63	251.861	94.4134	0.671	1.21663	1.2474	12.2	1.12	137	296.203	31.9073	17.1292
2015-12-15 10:30:00	11.78	250.568	94.2081	0.6588	1.19796	1.2411	12.3	1.42	45	174.43	28.5481	16.793
2015-12-15 10:45:00	11.79	251.194	94.418	0.6588	1.19796	1.3734	12.2	0.98	327	161.266	28.5475	17.4644
2015-12-15 11:00:00	11.8	251.131	94.4921	0.671	1.21663	1.3293	12.2	2.04	69	72.4051	13.602	8.06045
2015-12-15 11:15:00	11.77	253.726	95.1025	0.671	1.21663	1.1907	12.2	1.67	103	36.2026	5.54156	3.69437
2015-12-15 11:30:00	11.74	250.944	94.3124	0.6344	1.16063	1.2348	12.3	1.36	39	144.81	23.8455	15.2813
2015-12-15 11:45:00	11.82	248.439	93.5331	0.7076	1.27263	1.3986	12.2	1.19	60	55.9494	8.56423	5.37364
2015-12-15 12:00:00	11.73	251.856	94.6294	1.1712	1.98194	1.2348	12.2	1.63	30	345.568	47.3552	30.8984
2015-12-15 12:15:00	11.67	250.498	94.2442	0.8906	1.55262	1.1781	12.4	0.83	66	441.009	55.9194	36.2721
2015-12-15 12:30:00	11.93	256.396	96.2665	1.3908	2.31792	1.1529	12.5	1.01	353	306.076	39.1264	25.1886
2015-12-15 12:45:00	11.72	256.426	96.149	1.403	2.33659	1.0899	12.5	0.7	2	306.076	38.1185	24.8526
2015-12-15 13:00:00	11.73	255.06	95.8764	1.1224	1.90727	1.2789	12.5	2.16	45	437.722	68.6769	47.016
2015-12-15 13:15:00	11.64	257.67	96.5629	1.2688	2.13126	1.1151	12.5	1.93	31	325.82	54.0658	36.6036
2015-12-15 13:30:00	11.73	259.039	97.1854	1.2322	2.07527	1.0773	12.6	2.71	37	398.224	60.2761	40.296
2015-12-15 13:45:00	11.59	260.466	97.5094	1.0858	1.85127	1.0836	12.7	2.97	16	286.323	49.1942	32.908
2015-12-15 14:00:00	11.74	258.736	96.9552	1.3176	2.20593	1.1466	12.8	2.8	10	358.73	48.8586	31.2292
2015-12-15 14:15:00	11.8	258.024	96.8505	1.2078	2.03793	1.1214	12.8	2.13	16	233.671	34.2513	21.491
2015-12-15 14:30:00	11.87	258.356	97.0995	1.1834	2.0006	1.134	12.8	3.45	19	213.919	31.7327	19.4762
2015-12-15 14:45:00	11.82	260.816	98.0064	1.2322	2.07527	1.2789	12.8	2.96	3	181.009	30.3903	18.805
2015-12-15 15:00:00	11.81	262.656	98.6348	1.2322	2.07527	1.1592	12.7	3.33	15	128.348	21.6595	12.7606
2015-12-15 15:15:00	11.73	262.222	98.3235	0.9882	1.70195	1.071	12.6	3.93	24	154.674	24.1779	13.4322
2015-12-15 15:30:00	11.78	262.398	98.4254	0.8784	1.53395	1.0584	12.7	1.18	4	128.35	19.9801	10.7456
2015-12-15 15:45:00	11.75	261.882	97.9494	0.8418	1.47795	1.0395	13	2.54	63	128.353	21.6589	11.4171
2015-12-15 16:00:00	11.8	261.246	98.0561	0.9638	1.66461	1.1025	12.8	1.3	345	88.8608	15.7824	7.72331
2015-12-15 16:15:00	11.8	260.32	97.8263	1.2444	2.09393	1.1277	12.6	1.33	7	49.3661	8.39493	4.02956
2015-12-15 16:30:00	11.78	260.539	97.9863	1.4396	2.39259	1.1088	12.5	1.88	19	36.2025	7.38751	3.69376
2015-12-15 16:45:00	11.81	263.466	98.9697	1.2322	2.07527	1.1844	12.5	2.16	22	32.9107	5.37274	2.51847
2015-12-15 17:00:00	11.78	260.807	98.0268	1.3298	2.22459	1.134	12.5	1.6	22	13.164	2.51855	1.34323
2015-12-15 17:15:00	11.81	259.938	97.6948	1.159	1.96327	1.1214	12.4	2.28	3	0	0.335821	0.335821
2015-12-15 17:30:00	11.78	259.496	97.5359	1.037	1.77661	1.1214	12.4	2.14	16	0	0.335818	0.335818
2015-12-15 17:45:00	11.79	261.101	98.0774	1.2444	2.09393	1.0962	12.4	3.32	28	0	0	0.335839
2015-12-15 18:00:00	11.81	261.435	98.2461	1.2322	2.07527	1.0836	12.4	2.22	17	0	0	0.335844
2015-12-15 18:15:00	11.81	257.845	97.0514	1.281	2.14993	1.1151	12.4	3.24	21	0	0	0.335851
2015-12-15 18:30:00	11.84	258.014	97.0657	1.1834	2.0006	1.1088	12.3	2.95	21	0	0	0.335852
2015-12-15 18:45:00	11.85	257.296	96.8544	1.2566	2.1126	1.1088	12.4	2.72	14	0	0.167926	0.335852
2015-12-15 19:00:00	11.87	254.081	95.6832	1.22	2.0566	1.1088	12.5	1.55	44	0	0	0.335852
2015-12-15 19:15:00	11.85	252.75	95.1985	1.1346	1.92594	1.134	12.5	0.99	15	0	0	0.335852
2015-12-15 19:30:00	11.83	253.04	95.2803	1.098	1.86994	1.1088	12.4	1	20	0	0.167926	0.335852
2015-12-15 19:45:00	11.82	253.517	95.4457	1.1712	1.98194	1.1529	12.5	1.86	330	0	0	0.335852
2015-12-15 20:00:00	11.82	254.108	95.6684	1.098	1.86994	1.1088	12.5	3.32	15	0	0	0.335852
2015-12-15 20:15:00	11.83	254.053	95.6476	1.0858	1.85127	1.1781	12.5	2.17	31	0	0.167926	0.335852
2015-12-15 20:30:00	11.84	253.924	95.6069	1.159	1.96327	1.1907	12.4	1.21	21	0	0.167926	0.335852
2015-12-15 20:45:00	11.84	253.813	95.5653	1.0736	1.83261	1.1655	12.4	1.31	19	0	0	0.335852
2015-12-15 21:00:00	11.84	253.593	95.4822	1.3054	2.18726	1.1214	12.5	2.53	23	0	0	0.335852
2015-12-15 21:15:00	11.84	253.593	95.4822	1.1712	1.98194	1.1088	12.4	3.08	23	0	0	0.335852
2015-12-15 21:30:00	11.84	253.332	95.3842	1.1468	1.9446	1.1529	12.4	1.87	71	0	0	0.335852
2015-12-15 21:45:00	11.81	253.94	95.4323	1.0858	1.85127	1.1844	12.5	0.38	239	0	0.167926	0.335852
2015-12-15 22:00:00	11.8	253.012	95.1629	1.0004	1.72061	1.0836	12.8	1.22	305	0	0	0.335852
2015-12-15 22:15:00	11.84	253.068	95.2528	1.098	1.86994	1.1403	12.4	1.13	343	0	0.167926	0.335852
2015-12-15 22:30:00	11.82	252.305	94.97	1.0736	1.83261	1.1151	12.3	1.83	57	0	0	0.335852
2015-12-15 22:45:00	11.72	250.964	94.4108	0.9516	1.64595	1.0836	12.3	0.56	226	0	0.167926	0.335852
2015-12-15 23:00:00	11.77	250.988	94.2685	0.976	1.68328	1.0647	12.3	1.83	290	0	0.167926	0.335852
2015-12-15 23:15:00	11.69	250.802	94.3183	0.8784	1.53395	1.071	12.5	1.08	28	0	0.167926	0.335852
2015-12-15 23:30:00	11.63	249.403	93.5745	0.7808	1.38462	1.0395	12.4	1.35	320	0	0.167926	0.335852
2015-12-15 23:45:00	11.58	250.551	93.6638	0.793	1.40329	1.0773	12.4	0.68	344	0	0.167926	0.335852
2015-12-16	11.56	248.861	92.6691	0.7686	1.36596	1.2096	12.4	0.89	318	0	0.167926	0.335852
2015-12-16 00:15:00	11.52	251.758	93.9755	0.8662	1.51529	1.3356	12.4	0.67	231	0	0.167926	0.335852
2015-12-16 00:30:00	11.55	250.382	93.4169	0.854	1.49662	1.26	12.3	0.78	223	0	0	0.335852
2015-12-16 00:45:00	11.65	250.601	94.0246	1.2566	2.1126	1.2789	12.4	1.14	157	0	0	0.335852
2015-12-16 01:00:00	11.63	254.129	95.4098	1.0858	1.85127	1.3293	12.4	0.33	350	0	0	0.335852
2015-12-16 01:15:00	11.6	254.756	95.5596	1.0492	1.79528	1.2663	11.8	0.43	221	0	0.50378	0.335853
2015-12-16 01:30:00	11.54	250.01	93.5662	0.915	1.58995	1.2222	11.7	0.43	275	0	0.335852	0.335852
2015-12-16 01:45:00	11.56	250.648	94.06	1.0248	1.75794	1.2663	11.4	0.82	248	0	0	0.335855
2015-12-16 02:00:00	11.48	248.637	93.2681	0.9638	1.66461	1.197	11.8	1.3	271	0	0.167929	0.335859
2015-12-16 02:15:00	11.37	246.656	91.8506	0.7808	1.38462	1.1592	11.4	1.52	268	0	0.335876	0.335876
2015-12-16 02:30:00	10.81	250.157	92.8289	0.8296	1.45929	1.0836	11.4	1.24	258	0	0.335883	0.167942
2015-12-16 02:45:00	10.72	252.959	93.7539	0.793	1.40329	1.0269	11.3	0.95	243	0	0.167952	0.335905
2015-12-16 03:00:00	10.64	252.428	93.4757	0.9272	1.60862	1.0269	11.4	1.48	259	0	0	0.167954
2015-12-16 03:15:00	10.72	253.375	93.8888	1.0492	1.79528	1.1214	10.9	0.61	221	0	0.167954	0.335909
2015-12-16 03:30:00	10.73	251.864	93.5565	0.793	1.40329	1.1025	11	0.13	22	0	0.335906	0.335906
2015-12-16 03:45:00	10.7	254.274	94.1218	0.7442	1.32863	1.0206	11	0.95	328	0	0	0.335908
2015-12-16 04:00:00	10.66	253.133	93.7173	0.793	1.40329	1.0143	10.5	0.35	239	0	0	0.335921
2015-12-16 04:15:00	10.64	256.041	94.7605	0.9272	1.60862	1.0395	10.7	0.26	44	0	0	0.335923
2015-12-16 04:30:00	10.64	256.234	94.8455	0.915	1.58995	1.1025	10.7	0.28	277	0	0.167965	0.167965
2015-12-16 04:45:00	10.64	257.31	95.2498	1.037	1.77661	1.0395	10.4	0.12	117	0	0	0.335947
2015-12-16 05:00:00	10.68	253.549	93.9044	0.7686	1.36596	1.0332	10.9	0.84	3	0	0	0.16798
2015-12-16 05:15:00	10.66	254.526	94.2646	0.8784	1.53395	1.0206	10.4	1.01	306	0	0	0.335958
2015-12-16 05:30:00	10.65	253.465	93.8601	0.9394	1.62728	1.0143	10.2	1.41	297	0	0.167981	0.167981
2015-12-16 05:45:00	10.68	256.314	94.909	0.8784	1.53395	1.0962	9.9	0.72	335	0	0	0.167982
2015-12-16 06:00:00	10.73	253.011	93.9479	0.915	1.58995	1.071	9.8	0.59	257	0	0.167983	0.167983
2015-12-16 06:15:00	10.7	254.396	94.2381	0.9516	1.64595	1.0206	9.9	0.85	261	0	0.167983	0.167983
2015-12-16 06:30:00	10.74	251.393	93.1482	0.7686	1.36596	1.0395	9.4	1.55	303	0	0	0.335965
2015-12-16 06:45:00	10.79	251.898	93.3372	0.8418	1.47795	1.0584	9.3	0.6	249	0	0	0.167983
2015-12-16 07:00:00	10.83	252.287	93.5806	0.7442	1.32863	1.0332	9.4	0.68	211	0	0.335965	0.167983
2015-12-16 07:15:00	10.78	250.797	93.032	0.7076	1.27263	1.0395	9.4	1	271	0	0	0.335965
2015-12-16 07:30:00	10.81	250.517	92.9162	0.6954	1.25396	1.0332	9.3	0.9	245	0	0	0.335965
2015-12-16 07:45:00	10.75	251.183	93.1615	0.7564	1.34729	1.0332	9.1	1.88	280	0	0	0.335965
2015-12-16 08:00:00	10.75	252.946	93.7304	0.9882	1.70195	1.0269	9.1	1.62	257	3.29119	0.335965	0.335965
2015-12-16 08:15:00	10.84	251.369	93.1866	0.8174	1.44062	1.0332	9.4	0.81	267	9.87377	2.35175	1.17588
2015-12-16 08:30:00	10.8	249.142	92.4136	0.7808	1.38462	1.0269	9.6	0.72	313	29.6212	5.03947	2.35175
2015-12-16 08:45:00	10.71	253.728	94.2639	0.7442	1.32863	1.0647	9.6	0.47	335	59.2408	9.575	4.03158
2015-12-16 09:00:00	10.56	252.231	93.2366	0.5612	1.04864	0.9765	9.7	0.58	310	92.152	14.6145	6.55132
2015-12-16 09:15:00	10.59	252.492	93.2541	0.5978	1.10463	1.008	9.8	0.37	214	134.94	21.3338	10.079
2015-12-16 09:30:00	10.66	254.968	94.2888	0.6954	1.25396	0.9954	10	0.15	265	197.47	27.8851	13.9426
2015-12-16 09:45:00	10.67	256.838	95.1049	0.793	1.40329	0.9954	9.9	0.78	309	240.262	33.5965	17.6382
2015-12-16 10:00:00	10.68	254.098	94.2	0.8052	1.42196	1.0521	9.8	1.32	329	302.786	40.1478	22.0057
2015-12-16 10:15:00	10.67	256.869	95.3255	0.9028	1.57128	1.008	9.9	1.88	288	325.823	44.6833	25.8693
2015-12-16 10:30:00	10.8	257.438	95.4758	0.8174	1.44062	1.1403	10	1.46	348	365.317	50.8987	30.2369
2015-12-16 10:45:00	11.06	255.22	94.3039	0.732	1.30996	1.0143	10	0.44	317	431.14	58.7916	35.6109
2015-12-16 11:00:00	11.22	253.993	94.5344	0.7198	1.29129	1.1277	10.2	0.53	335	411.393	60.972	38.4644
2015-12-16 11:15:00	11.46	252.605	94.2354	0.671	1.21663	1.2474	10.6	0.34	21	503.545	67.5183	43.6686
2015-12-16 11:30:00	11.54	252.597	94.5034	0.6954	1.25396	1.3293	10.8	0.84	318	473.925	67.3459	44.3374
2015-12-16 11:45:00	11.44	251.221	94.5071	0.671	1.21663	1.2474	11.6	1.59	296	602.279	77.0792	51.0503
2015-12-16 12:00:00	11.61	252.629	94.6768	0.6954	1.25396	1.2411	12.1	1.65	285	622.006	80.4367	53.7364
2015-12-16 12:15:00	11.45	254.593	95.3946	0.6832	1.2353	1.3671	13.1	3.54	287	589.107	79.2552	54.404
2015-12-16 12:30:00	11.7	254.905	95.8781	0.6588	1.19796	1.2537	13.7	2.17	272	720.75	86.3002	58.429
2015-12-16 12:45:00	11.75	258.309	96.7091	0.6832	1.2353	1.2033	14.6	2.24	285	720.678	88.4857	60.4456
2015-12-16 13:00:00	11.66	260.417	97.8814	0.6466	1.1793	1.1655	15.3	2.21	273	720.561	88.3147	60.1077
2015-12-16 13:15:00	11.48	256.954	96.1076	0.671	1.21663	1.0899	15.4	3.06	279	766.588	90.1612	60.4433
2015-12-16 13:30:00	11.5	259.068	96.8138	0.6588	1.19796	1.0899	15.3	1.68	282	766.585	87.1335	57.4175
2015-12-16 13:45:00	11.44	261.762	97.8176	0.7564	1.34729	1.1277	15.1	0.73	337	556.02	78.5641	52.3761
2015-12-16 14:00:00	11.45	259.917	97.1475	0.8296	1.45929	1.0836	13.4	1.3	349	694.188	79.9061	51.3682
2015-12-16 14:15:00	11.47	267.608	100.182	0.8784	1.53395	1.197	13.4	1.59	103	727	77.7235	48.3464
2015-12-16 14:30:00	11.53	261.408	97.7659	0.7686	1.36596	1.0962	12.9	1.79	46	621.729	70.5022	42.9728
2015-12-16 14:45:00	11.61	263.818	98.9566	0.8296	1.45929	1.1277	13.7	0.49	146	552.563	62.9415	37.2614
2015-12-16 15:00:00	11.55	259.828	97.7164	0.9516	1.64595	1.1151	14.4	0.59	13	411.123	50.3473	31.2153
2015-12-16 15:15:00	11.46	262.28	98.2852	0.793	1.40329	1.1025	14.5	0.61	97	476.902	48.4976	26.8499
2015-12-16 15:30:00	11.41	269.578	100.968	0.6466	1.1793	1.0773	16.1	0.67	124	345.343	36.9166	20.1363
2015-12-16 15:45:00	11.35	273.843	102.313	0.976	1.68328	1.0836	16.3	0.87	144	259.829	28.3562	15.1009
2015-12-16 16:00:00	11.26	271.191	101.415	0.8052	1.42196	1.3797	16.1	1.17	168	207.206	23.6583	11.9131
2015-12-16 16:15:00	11.17	283.897	106.216	0.7564	1.34729	1.0899	16.1	0.62	174	148.004	16.7795	8.05414
2015-12-16 16:30:00	11.11	283.112	105.607	0.6832	1.2353	2.9547	15	1.04	303	69.0686	11.4107	5.03415
2015-12-16 16:45:00	11.09	272.828	101.742	0.8784	1.53395	4.2399	13.5	0.7	317	42.7567	6.8803	3.18843
2015-12-16 17:00:00	11.12	272.169	101.733	0.9028	1.57128	2.0223	13.1	0.17	234	13.1559	3.35632	1.51035
2015-12-16 17:15:00	10.95	263.325	98.0799	0.9394	1.62728	3.4839	13.1	0.34	246	6.57796	1.17486	0.503513
2015-12-16 17:30:00	11.13	267.105	99.4108	1.0126	1.73928	2.5641	13.2	0.97	304	0	0.167841	0.335682
2015-12-16 17:45:00	11.11	262.134	97.8042	1.0736	1.83261	1.7073	12.5	0.64	284	0	0.167864	0.335728
2015-12-16 18:00:00	11.15	265.911	99.2544	1.3786	2.29926	1.6695	12.2	1.41	342	0	0	0.335732
2015-12-16 18:15:00	11.19	264.608	98.8281	1.2444	2.09393	1.7199	12	1.15	295	0	0	0.335738
2015-12-16 18:30:00	11.26	262.429	98.039	1.3176	2.20593	1.6947	12.1	0.83	331	0	0	0.335753
2015-12-16 18:45:00	11.28	262.849	98.2258	1.3786	2.29926	1.2537	12.6	1.42	294	0	0	0.33579
2015-12-16 19:00:00	11.29	268.501	100.355	1.0492	1.79528	1.1088	12.6	1.26	307	0	0	0.335795
2015-12-16 19:15:00	11.33	258.369	96.6286	1.403	2.33659	1.1655	12.3	0.5	301	0	0.167898	0.335796
2015-12-16 19:30:00	11.33	258.553	96.7464	1.3054	2.18726	1.1655	12.8	1.2	312	0	0.1679	0.3358
2015-12-16 19:45:00	11.35	257.505	96.3589	1.1956	2.01927	1.197	12.3	2	335	0	0	0.335796
2015-12-16 20:00:00	11.33	257.991	96.4949	1.1834	2.0006	1.1907	11.9	1.5	327	0	0.167898	0.335796
2015-12-16 20:15:00	11.32	257.073	96.2206	1.2322	2.07527	1.3356	11.9	0.67	220	0	0	0.33582
2015-12-16 20:30:00	11.29	259.077	96.8955	1.1956	2.01927	1.2285	12.5	0.91	214	0	0.335847	0.335847
2015-12-16 20:45:00	11.26	259.515	96.9497	1.2322	2.07527	1.1403	12.8	0.7	90	0	0	0.335852
2015-12-16 21:00:00	11.23	258.314	96.4644	1.0736	1.83261	1.134	12.4	1.02	165	0	0	0.335852
2015-12-16 21:15:00	11.25	257.932	96.2935	1.0614	1.81394	1.1277	12.5	0.63	102	0	0.167926	0.335852
2015-12-16 21:30:00	11.25	256.04	95.5994	0.732	1.30996	1.2411	12.2	0.38	267	0	0.335852	0.335852
2015-12-16 21:45:00	11.23	256.798	95.8606	1.0614	1.81394	1.0962	12	0.33	14	0	0.335852	0.335852
2015-12-16 22:00:00	11.2	258.155	96.3819	0.9272	1.60862	1.1403	11.7	0.71	270	0	0	0.335852
2015-12-16 22:15:00	11.2	257.996	96.2885	0.976	1.68328	1.1907	11.6	0.48	263	0	0	0.335852
2015-12-16 22:30:00	11.15	257.716	96.1849	0.976	1.68328	1.1529	11.4	1.03	250	0	0	0.335855
2015-12-16 22:45:00	11.13	257.37	95.9678	0.9394	1.62728	1.2537	11.8	1.01	249	0	0.335872	0.335872
2015-12-16 23:00:00	11.11	257.353	95.9736	0.8174	1.44062	1.1277	12	0.9	225	0	0	0.33589
2015-12-16 23:15:00	11.07	259.691	96.7616	0.9638	1.66461	1.134	12.5	0.85	206	0	0.167947	0.335894
2015-12-16 23:30:00	11.09	255.609	95.3259	0.6588	1.19796	1.0836	12.6	0.36	217	0	0	0.335893
2015-12-16 23:45:00	11.02	262.91	97.8782	0.793	1.40329	1.2474	12.7	0.51	211	0	0.16795	0.3359
2015-12-17	11.01	265.371	98.8546	0.7808	1.38462	1.1025	12.7	0.44	230	0	0.167949	0.335897
2015-12-17 00:15:00	11.16	265.753	99.2482	0.6344	1.16063	1.0899	12.8	1.5	270	0	0.3359	0.3359
2015-12-17 00:30:00	11.03	265.268	98.8662	0.6344	1.16063	1.0521	12.6	1.12	244	0	0.167947	0.335894
2015-12-17 00:45:00	11.13	272.379	101.565	0.7198	1.29129	1.1214	12.2	0.6	211	0	0.335895	0.167948
2015-12-17 01:00:00	11.13	278.67	104.247	0.6344	1.16063	1.0962	12.7	0.6	231	0	0	0.335887
2015-12-17 01:15:00	11.23	270.658	101.175	0.488	0.93664	1.0899	12.6	3.16	108	0	0	0.335879
2015-12-17 01:30:00	11.16	276.536	103.368	0.6588	1.19796	1.0899	12.9	2.06	119	0	0	0.335887
2015-12-17 01:45:00	11.2	268.015	99.9347	0.854	1.49662	1.1718	12.7	1.09	96	0	0	0.335877
2015-12-17 02:00:00	11.12	259.353	96.7561	0.8418	1.47795	1.1088	12.5	0.54	122	0	0.167937	0.335874
2015-12-17 02:15:00	11.07	268.35	100.132	0.8296	1.45929	1.0962	12.3	0.11	130	0	0.335862	0.335862
2015-12-17 02:30:00	11.08	258.968	96.6189	0.9272	1.60862	1.1214	12.1	1	133	0	0.335858	0.335858
2015-12-17 02:45:00	11.06	262.609	97.9082	0.976	1.68328	1.1655	12	1.24	40	0	0.167937	0.335875
2015-12-17 03:00:00	11.05	267.499	99.7213	1.0492	1.79528	1.1592	11.5	0.83	154	0	0	0.335877
2015-12-17 03:15:00	11.06	267.95	99.9182	0.9028	1.57128	1.1655	12.1	1.03	143	0	0	0.335874
2015-12-17 03:30:00	11.08	264.544	98.6151	0.9272	1.60862	1.1151	12.5	0.68	164	0	0.167939	0.335878
2015-12-17 03:45:00	11.11	262.73	97.9345	0.9638	1.66461	1.1151	12.5	0.86	126	0	0.167943	0.335887
2015-12-17 04:00:00	11.12	264.355	98.5529	0.9516	1.64595	1.1088	12.4	1.77	75	0	0	0.335883
2015-12-17 04:15:00	11.04	265.515	99.0048	1.0614	1.81394	1.1151	12.1	1.2	106	0	0	0.335872
2015-12-17 04:30:00	11.15	264.169	98.5229	1.1224	1.90727	1.2222	12.1	2.69	87	0	0.167946	0.335892
2015-12-17 04:45:00	11.13	262.77	98.0479	1.159	1.96327	1.1151	11.8	3.17	89	0	0	0.335874
2015-12-17 05:00:00	11.18	266.705	99.5964	1.2566	2.1126	1.5876	11.6	3.09	92	0	0	0.335883
2015-12-17 05:15:00	11.2	262.245	97.9735	1.0004	1.72061	1.197	11.5	3.47	91	0	0.335874	0.335874
2015-12-17 05:30:00	11.23	260.131	97.2381	0.9882	1.70195	1.0962	11.5	1.69	102	0	0	0.335879
2015-12-17 05:45:00	11.25	257.001	96.0961	0.976	1.68328	1.1025	11.6	0.37	143	0	0.335882	0.335882
2015-12-17 06:00:00	11.23	256.714	95.9689	1.0004	1.72061	1.1025	11.4	0.89	299	0	0	0.335881
2015-12-17 06:15:00	11.21	256.448	95.7473	0.8906	1.55262	1.134	11.4	1.66	279	0	0.335884	0.335884
2015-12-17 06:30:00	11.2	257.3	96.0209	0.8906	1.55262	1.1277	11.3	1.65	280	0	0	0.335884
2015-12-17 06:45:00	11.22	257.905	96.2286	1.0004	1.72061	1.2852	11.3	1.08	282	0	0	0.335892
2015-12-17 07:00:00	11.2	256.584	95.6888	0.8662	1.51529	1.0836	11.2	0.62	300	0	0	0.335894
2015-12-17 07:15:00	11.23	256.054	95.6035	0.9882	1.70195	1.1277	11.2	0.27	246	0	0	0.335897
2015-12-17 07:30:00	11.28	253.605	94.877	1.037	1.77661	1.2474	11.3	0.56	268	0	0	0.335905
2015-12-17 07:45:00	11.34	254.577	95.4567	0.9516	1.64595	1.1403	11.4	0.45	267	0	0.503862	0.335908
2015-12-17 08:00:00	11.43	255.468	95.9626	0.915	1.58995	1.1403	11.5	1.33	85	0	0	0.335904
2015-12-17 08:15:00	11.39	251.163	94.2609	0.915	1.58995	1.0962	11.4	1.91	94	6.58228	1.17568	0.839771
2015-12-17 08:30:00	11.44	255.813	96.1875	0.8784	1.53395	1.0962	11.5	2.42	95	13.1646	3.19111	1.67953
2015-12-17 08:45:00	11.3	255.252	95.839	0.732	1.30996	1.0962	11.7	2.77	88	26.3291	4.53473	2.5193
2015-12-17 09:00:00	11.27	252.289	94.3958	0.6588	1.19796	1.0584	11.8	2.27	93	42.7848	6.88598	3.69492
2015-12-17 09:15:00	11.51	252.95	94.7567	0.7198	1.29129	1.1277	11.9	3.48	89	32.9114	5.71031	3.359
2015-12-17 09:30:00	11.44	253.617	95.2619	0.7198	1.29129	1.0962	11.9	3.58	104	42.7848	7.55775	4.0308
2015-12-17 09:45:00	11.47	259.431	97.5582	0.61	1.1233	1.0773	11.9	2.67	89	82.2785	12.9316	7.38948
2015-12-17 10:00:00	11.38	260.068	97.6089	0.61	1.1233	1.0836	12	3.32	94	62.5317	9.90818	5.7098
2015-12-17 10:15:00	11.24	263.897	99.1232	0.5612	1.04864	1.0269	12.1	1.62	99	62.5317	10.4117	6.04551
2015-12-17 10:30:00	11.3	263.135	98.7546	0.5002	0.955306	1.0395	12.1	2.83	90	75.6963	11.7553	7.38903
2015-12-17 10:45:00	11.3	264.279	98.5656	0.6466	1.1793	1.0395	12.1	1.31	126	82.2785	13.4346	8.73252
2015-12-17 11:00:00	11.36	265.698	99.3051	0.5124	0.973972	1.0332	12.1	1.64	79	102.025	16.1212	10.7475
2015-12-17 11:15:00	11.42	258.06	96.3709	0.8296	1.45929	1.0962	12.2	0.67	89	174.43	28.0437	19.3115
2015-12-17 11:30:00	11.6	252.94	94.7093	0.7442	1.32863	1.1844	12.3	1.28	82	141.519	21.6625	14.9454
2015-12-17 11:45:00	11.69	253.095	95.1401	0.793	1.40329	1.3293	12.4	2.39	80	200.76	31.5701	22.1663
2015-12-17 12:00:00	11.67	252.795	95.1382	0.8906	1.55262	1.2789	12.4	3.09	84	227.089	33.4173	23.3417
2015-12-17 12:15:00	11.69	253.293	95.2483	0.854	1.49662	1.2978	12.3	3.04	70	207.342	31.738	22.838
2015-12-17 12:30:00	11.7	254.292	95.5022	0.9272	1.60862	1.26	12.6	3.28	94	174.43	25.8606	18.4719
2015-12-17 12:45:00	11.78	253.481	95.4535	0.793	1.40329	1.3356	12.6	3.58	75	200.76	30.5616	21.8297
2015-12-17 13:00:00	11.9	251.849	94.8616	0.9028	1.57128	1.2915	12.6	2.22	78	240.253	33.584	23.5088
2015-12-17 13:15:00	11.87	251.467	94.7425	0.9272	1.60862	1.2474	12.6	2.21	75	194.175	28.0419	19.814
2015-12-17 13:30:00	11.92	250.652	94.4309	1.0248	1.75794	1.3041	12.6	2.31	110	259.996	35.5983	24.5158
2015-12-17 13:45:00	11.98	254.009	95.7663	0.976	1.68328	1.2411	12.7	3.7	84	543.033	61.6215	40.2974
2015-12-17 14:00:00	11.96	252.336	95.1546	1.0858	1.85127	1.3734	12.8	3.56	70	434.43	72.1969	49.3625
2015-12-17 14:15:00	11.98	252.105	95.0636	1.1224	1.90727	1.1403	13	4.4	70	674.684	78.5772	51.0416
2015-12-17 14:30:00	11.97	252.782	95.4423	1.0614	1.81394	1.2348	13	4.35	78	348.861	64.6417	42.6467
2015-12-17 14:45:00	11.88	252.827	95.502	1.1834	2.0006	1.1592	13	3.81	75	306.041	57.5908	37.2745
2015-12-17 15:00:00	11.94	254.635	96.0947	1.2322	2.07527	1.1718	13.2	2.72	99	266.532	49.6979	31.2291
2015-12-17 15:15:00	11.88	261.197	98.2946	1.0004	1.72061	1.1718	13.2	2.32	94	227.043	34.0833	20.1478
2015-12-17 15:30:00	11.81	255.473	96.2239	1.1712	1.98194	1.2474	13.2	2.32	77	141.481	21.3232	12.4245
2015-12-17 15:45:00	11.8	255.827	96.3685	1.1468	1.9446	1.2159	13.1	2.9	86	108.581	17.7972	9.73809
2015-12-17 16:00:00	11.82	254.884	96.0413	1.159	1.96327	1.26	13.1	1.78	104	72.3852	12.5923	6.38012
2015-12-17 16:15:00	11.84	254.942	96.0303	1.2444	2.09393	1.2159	13.1	1.96	108	32.9028	8.7307	4.36535
2015-12-17 16:30:00	11.81	254.537	95.9098	1.3054	2.18726	1.1592	13	1.33	87	26.3232	5.54066	3.02218
2015-12-17 16:45:00	11.68	257.256	96.8156	1.1712	1.98194	1.134	13	1.1	92	13.1623	3.19006	1.67898
2015-12-17 17:00:00	11.66	256.176	96.3615	1.0858	1.85127	1.1277	13	2.34	67	6.58139	1.5111	1.0074
2015-12-17 17:15:00	11.68	255.812	96.0839	0.9272	1.60862	1.1088	12.9	0.83	67	0	0.671627	0.335813
2015-12-17 17:30:00	11.68	255.879	96.2923	0.9638	1.66461	1.1466	12.9	0.46	51	0	0	0.335803
2015-12-17 17:45:00	11.5	256.995	96.4562	0.9394	1.62728	1.1025	12.8	1.64	55	0	0.167901	0.335801
2015-12-17 18:00:00	11.56	262.235	98.258	1.0126	1.73928	1.1466	12.6	0.85	131	0	0	0.335796
2015-12-17 18:15:00	11.52	262.991	98.6805	1.1102	1.88861	1.1151	12.8	0.86	75	0	0	0.335796
2015-12-17 18:30:00	11.44	263.374	98.8864	0.976	1.68328	1.0773	12.8	0.59	72	0	0	0.335796
2015-12-17 18:45:00	11.48	263.056	98.8513	0.854	1.49662	1.071	12.5	0.54	322	0	0	0.335801
2015-12-17 19:00:00	11.38	262.24	98.3915	1.0858	1.85127	1.1025	12.5	0.89	18	0	0.335808	0.335808
2015-12-17 19:15:00	11.63	253.755	95.3823	1.098	1.86994	1.2411	12.5	1.28	18	0	0.16791	0.335821
2015-12-17 19:30:00	11.63	253.641	95.2702	1.0614	1.81394	1.0773	12.4	1.43	355	0	0	0.335829
2015-12-17 19:45:00	11.66	254.024	95.4514	1.0004	1.72061	1.1025	12.4	1.66	12	0	0	0.335843
2015-12-17 20:00:00	11.55	254.639	95.7607	0.793	1.40329	1.0458	12.4	0.94	8	0	0.167923	0.335846
2015-12-17 20:15:00	11.54	263.456	99.1171	0.854	1.49662	1.1088	12.4	0.81	11	0	0	0.335852
2015-12-17 20:30:00	11.41	264.941	99.6541	0.854	1.49662	1.071	12.4	0.75	10	0	0	0.33585
2015-12-17 20:45:00	11.46	264.546	99.3048	1.1224	1.90727	1.1025	12.4	0.25	212	0	0	0.335851
2015-12-17 21:00:00	11.35	262.45	98.3143	1.22	2.0566	1.1214	12.3	1.53	19	0	0	0.335852
2015-12-17 21:15:00	11.36	261.64	98.0859	1.159	1.96327	1.1088	12.3	0.32	320	0	0	0.335852
2015-12-17 21:30:00	11.42	261.044	97.8566	1.1712	1.98194	1.0962	12.3	0.69	124	0	0.167926	0.335852
2015-12-17 21:45:00	11.49	259.209	97.2789	1.1102	1.88861	1.1025	12.6	0.8	106	0	0	0.335852
2015-12-17 22:00:00	11.46	259.202	97.3254	1.1102	1.88861	1.0836	12.7	1.32	139	0	0	0.335852
2015-12-17 22:15:00	11.54	258.108	96.887	1.0736	1.83261	1.0584	12.8	1.37	110	0	0	0.335852
2015-12-17 22:30:00	11.46	258.053	96.8654	0.915	1.58995	1.071	12.8	1.37	71	0	0.167926	0.335852
2015-12-17 22:45:00	11.46	257.114	96.5052	0.793	1.40329	1.0206	12.6	0.72	346	0	0	0.335852
2015-12-17 23:00:00	11.45	259.346	97.4218	1.0736	1.83261	1.1151	12.4	0.12	77	0	0	0.335852
2015-12-17 23:15:00	11.45	255.39	95.9046	1.0004	1.72061	1.0836	12.3	0.48	270	0	0	0.335852
2015-12-17 23:30:00	11.58	259.079	97.1812	1.1102	1.88861	1.1592	12.3	0.71	258	0	0	0.335852
2015-12-17 23:45:00	11.16	256.739	96.0135	0.9394	1.62728	1.1025	12.2	0.79	249	0	0.167926	0.335852
2015-12-18	11.11	261.657	97.7554	0.9516	1.64595	1.0395	12.3	0.56	296	0	0	0.335852
2015-12-18 00:15:00	11.35	260.25	97.4392	0.7442	1.32863	1.0521	12.2	0.49	235	0	0	0.335852
2015-12-18 00:30:00	11.23	254.944	95.3518	0.915	1.58995	1.1151	12.3	0.33	282	0	0	0.335852
2015-12-18 00:45:00	11.26	259.219	97.1464	1.0736	1.83261	1.0773	12.2	0.48	246	0	0	0.335852
2015-12-18 01:00:00	11.19	256.054	95.7791	0.976	1.68328	1.0647	12.5	0.91	127	0	0	0.335852
2015-12-18 01:15:00	11.28	258.82	96.72	0.9882	1.70195	1.071	12.6	0.22	52	0	0	0.335852
2015-12-18 01:30:00	11.3	255.914	95.8411	0.9516	1.64595	1.0521	12.6	0.74	125	0	0.167926	0.167926
2015-12-18 01:45:00	11.25	253.05	94.7138	0.854	1.49662	1.0647	12.6	1.02	108	0	0.167926	0.335852
2015-12-18 02:00:00	11.27	251.726	94.167	0.9272	1.60862	1.0269	12.6	0.26	129	0	0	0.335852
2015-12-18 02:15:00	11.34	250.444	93.7885	0.8296	1.45929	1.0395	12.7	0.68	126	0	0.167926	0.335852
2015-12-18 02:30:00	11.26	248.205	92.939	0.732	1.30996	1.0395	12.7	0.52	151	0	0	0.335852
2015-12-18 02:45:00	11.25	253.146	94.6787	0.732	1.30996	1.0458	12.6	0.6	315	0	0	0.335852
2015-12-18 03:00:00	11.34	252.687	94.7661	0.7564	1.34729	0.9891	12.4	0.11	115	0	0	0.335852
2015-12-18 03:15:00	11.4	251.895	94.198	0.671	1.21663	1.0017	12.6	0.95	128	0	0	0.335852
2015-12-18 03:30:00	11.32	244.576	91.6861	0.6832	1.2353	1.008	12.6	0.71	114	0	0.167926	0.335852
2015-12-18 03:45:00	11.2	249.795	93.4495	0.9394	1.62728	1.0458	12.6	0.68	61	0	0	0.335852
2015-12-18 04:00:00	11.21	253.883	94.9987	0.9394	1.62728	1.0269	12.6	0.72	125	0	0	0.335852
2015-12-18 04:15:00	11.19	255.124	95.4355	1.0248	1.75794	1.134	12.6	0.53	46	0	0.335852	0.335852
2015-12-18 04:30:00	11.12	258.621	96.5809	1.1224	1.90727	1.0521	12.4	0.28	329	0	0	0.335852
2015-12-18 04:45:00	11.16	259.232	96.8029	1.1712	1.98194	1.0458	12.3	0.44	33	0	0.167926	0.335852
2015-12-18 05:00:00	11.35	255.095	95.5947	1.1224	1.90727	1.0584	12.2	0.8	46	0	0.167926	0.335852
2015-12-18 05:15:00	11.32	258.914	96.9777	1.1712	1.98194	1.071	12.1	0.5	349	0	0.167926	0.335852
2015-12-18 05:30:00	11.23	257.134	96.1771	1.2078	2.03793	1.071	12.1	0.77	81	0	0	0.167926
2015-12-18 05:45:00	11.27	255.694	95.6919	1.1346	1.92594	1.0647	12.1	0.73	276	0	0	0.335852
2015-12-18 06:00:00	11.27	256.032	95.8167	1.098	1.86994	1.1151	12.2	1.08	36	0	0	0.335852
2015-12-18 06:15:00	11.2	254.632	95.2394	0.9638	1.66461	1.0521	12.1	0.81	36	0	0.167926	0.335852
2015-12-18 06:30:00	11.15	258.843	96.692	0.9394	1.62728	1.0458	12.1	0.4	311	0	0	0.335852
2015-12-18 06:45:00	11.22	257.843	96.3123	0.9272	1.60862	1.0647	12.1	0.39	17	0	0	0.335852
2015-12-18 07:00:00	11.38	254.185	95.0397	0.854	1.49662	1.0395	12.1	0.24	245	0	0.167926	0.335852
2015-12-18 07:15:00	11.34	251.261	94.0762	0.915	1.58995	1.0962	12.2	0.82	2	0	0.167926	0.335852
2015-12-18 07:30:00	11.29	253.682	94.9569	0.915	1.58995	1.0584	12.2	0.29	227	0	0	0.335852
2015-12-18 07:45:00	11.23	257.278	96.1194	1.0858	1.85127	1.0899	12.2	0.38	331	0	0.167926	0.335852
2015-12-18 08:00:00	11.28	259.076	96.686	1.159	1.96327	1.0962	12.2	0.97	283	0	0.167926	0.335852
2015-12-18 08:15:00	11.13	255.725	95.4777	1.0736	1.83261	1.0395	12.2	0.6	347	6.58228	1.17548	0.671704
2015-12-18 08:30:00	11.26	260.815	97.5317	0.793	1.40329	0.9891	12.2	0.36	342	19.7468	3.02267	1.51134
2015-12-18 08:45:00	11.09	258.975	96.5967	0.9028	1.57128	1.008	12.2	0.32	246	32.9114	4.36608	2.35096
2015-12-18 09:00:00	11.03	257.321	95.9105	0.671	1.21663	0.9891	12.2	1.04	323	26.3291	6.21326	3.52645
2015-12-18 09:15:00	10.96	256.222	95.386	0.671	1.21663	1.0458	12.2	0.13	242	39.4937	11.251	5.70949
2015-12-18 09:30:00	11.1	260.576	97.1473	0.9516	1.64595	1.0017	12.2	1.22	33	62.5317	15.1134	8.06045
2015-12-18 09:45:00	11.09	260.498	97.0595	0.9028	1.57128	1.0395	12.3	0.66	86	85.5697	17.1285	9.73971
2015-12-18 10:00:00	11.13	260.841	97.4178	0.9516	1.64595	1.0395	12.4	0.28	271	161.266	24.3493	13.7699
2015-12-18 10:15:00	10.95	264.096	98.5918	0.9882	1.70195	1.0647	12.4	0.65	319	194.177	28.0437	16.7926
2015-12-18 10:30:00	10.78	259.498	96.4177	0.549	1.02997	1.0269	12.4	0.45	316	233.671	32.2418	19.4794
2015-12-18 10:45:00	10.81	260.297	96.6959	0.4758	0.917974	0.9828	12.6	1.06	22	286.329	40.1343	25.5248
2015-12-18 11:00:00	10.83	258.606	95.9932	0.671	1.21663	0.9828	12.7	0.18	290	352.147	49.034	31.9057
2015-12-18 11:15:00	10.89	253.634	94.3062	0.6466	1.1793	1.0332	12.9	0.21	37	378.471	55.4128	36.9419
2015-12-18 11:30:00	10.81	257.914	95.8802	0.732	1.30996	1.008	13.1	0.56	31	388.332	57.9287	39.6266
2015-12-18 11:45:00	11.06	266.456	99.3533	0.793	1.40329	1.0206	13.1	0.13	55	398.2	59.94	41.8069
2015-12-18 12:00:00	11.57	260.184	97.5449	0.9028	1.57128	1.071	13.4	0.26	351	437.705	65.4814	46.1728
2015-12-18 12:15:00	11.7	256.281	96.3749	0.793	1.40329	1.2033	13.4	0.88	312	467.275	67.9988	48.0189
2015-12-18 12:30:00	11.76	262.815	98.7555	0.8662	1.51529	1.2348	13.6	0.78	332	437.594	70.0135	50.7052
2015-12-18 12:45:00	11.78	256.877	96.7865	0.8784	1.53395	1.2852	13.7	1.07	320	378.358	57.9248	40.9671
2015-12-18 13:00:00	11.82	258.733	97.5629	0.976	1.68328	1.4049	13.6	0.85	309	345.457	56.4137	40.2955
2015-12-18 13:15:00	11.9	259.311	97.6254	0.9028	1.57128	1.1907	13.9	0.77	311	312.556	55.4047	39.9585
2015-12-18 13:30:00	11.83	259.381	97.9061	0.9028	1.57128	1.134	14	0.1	294	371.777	60.4381	42.4746
2015-12-18 13:45:00	11.9			0.9028	1.57128	1.1403	13.9	1.19	301	582.346	75.8778	50.3613
2015-12-18 14:00:00	12.08	258.15	97.4765	0.9272	1.60862	1.2474	14.6	0.67	333	694.207	73.8628	49.018
2015-12-18 14:15:00	12.22	256.413	97.2645	1.0614	1.81394	1.2411	14.9	0.86	348	549.426	69.666	46.3321
2015-12-18 14:30:00	12.25	263.547	99.7516	1.0614	1.81394	1.1907	14.5	0.73	72	539.512	61.103	38.9447
2015-12-18 14:45:00	12.2	257.035	97.2427	1.098	1.86994	1.1781	14.1	0.53	33	430.936	52.8747	33.2355
2015-12-18 15:00:00	12.13	262.978	99.6333	1.0492	1.79528	1.1592	14.3	0.72	100	457.187	49.3458	30.2117
2015-12-18 15:15:00	12.12	264.961	100.301	0.915	1.58995	1.2096	14.8	0.2	189	325.612	41.117	24.1668
2015-12-18 15:30:00	12.13	262.324	99.2368	1.0614	1.81394	1.2222	14.7	1.1	168	272.987	34.2344	19.4666
2015-12-18 15:45:00	11.99	263.551	99.6996	1.0004	1.72061	1.1277	14.4	1.05	149	207.207	28.1937	15.2716
2015-12-18 16:00:00	11.99	262.975	99.4367	0.915	1.58995	1.1088	14.4	0.69	162	187.473	23.8328	12.0842
2015-12-18 16:15:00	12.01	260.061	98.3271	0.8906	1.55262	1.1088	14.4	0.91	142	141.432	18.1268	8.72773
2015-12-18 16:30:00	11.96	264.076	99.7838	0.9028	1.57128	1.1214	14.1	1.18	155	118.431	12.9253	5.70726
2015-12-18 16:45:00	11.91	262.469	99.1073	0.915	1.58995	1.1844	14	0.91	150	65.7941	7.21836	3.52524
2015-12-18 17:00:00	11.96	262.741	99.1794	0.976	1.68328	1.1403	13.9	0.59	155	36.1867	3.86095	1.67867
2015-12-18 17:15:00	11.91	257.495	97.3519	0.9638	1.66461	1.0836	13.8	0.95	128	13.1602	1.00722	0.671478
2015-12-18 17:30:00	11.86	256.907	97.0437	1.0248	1.75794	1.1403	13.6	0.63	148	3.29008	0.335739	0.335739
2015-12-18 17:45:00	11.7	259.715	98.0377	0.6954	1.25396	1.0521	13.6	0.69	156	3.29008	0	0.335755
2015-12-18 18:00:00	11.47	259.737	97.7618	0.793	1.40329	1.1277	13.4	0.36	186	0	0	0.335787
2015-12-18 18:15:00	11.36	263.318	98.5723	0.9516	1.64595	1.512	13.2	0.23	171	0	0	0.335795
2015-12-18 18:30:00	11.28	266.579	99.6911	0.976	1.68328	1.2978	12.4	0.07	76	0	0.335796	0.167898
2015-12-18 18:45:00	11.38	266.214	99.7635	0.7808	1.38462	1.1655	12.3	0.37	235	0	0	0.335796
2015-12-18 19:00:00	11.19	269.745	100.93	1.0004	1.72061	1.2474	12.3	0.73	65	0	0	0.335808
2015-12-18 19:15:00	11.29	276.652	103.663	0.8418	1.47795	1.3293	12	0.45	104	0	0.335797	0.335797
2015-12-18 19:30:00	11.32	269.944	101.21	0.9394	1.62728	1.2978	11.8	0.58	105	0	0	0.167901
2015-12-18 19:45:00	11.36	269.39	101.132	0.8662	1.51529	1.2915	11.4	0.14	245	3.29115	0	0.335826
2015-12-18 20:00:00	11.63	259.531	98.039	1.2932	2.1686	1.2033	11.4	0.8	286	0	0	0.335849
2015-12-18 20:15:00	11.64	260.323	98.1752	1.1956	2.01927	1.1403	11.2	0.27	230	0	0	0.335852
2015-12-18 20:30:00	11.48	270.712	101.733	0.8296	1.45929	1.071	11.1	0.18	247	3.29116	0	0.335853
2015-12-18 20:45:00	11.53	266.426	100.093	0.8052	1.42196	1.0773	10.7	0.52	250	3.29116	0	0.335855
2015-12-18 21:00:00	11.57	262.251	98.8954	1.281	2.14993	1.0962	10.7	0.56	254	0	0	0.167942
2015-12-18 21:15:00	11.58	259.15	97.5508	1.22	2.0566	1.1592	10.6	0.23	308	0	0	0.335906
2015-12-18 21:30:00	11.57	250.289	94.2434	1.1224	1.90727	1.1088	10.5	0.19	249	0	0.167954	0.167954
2015-12-18 21:45:00	11.55	251.466	94.5585	1.3298	2.22459	1.2222	10.4	1.07	247	0	0	0.335917
2015-12-18 22:00:00	11.53	255.844	96.1508	1.2322	2.07527	1.0647	10.4	0.44	256	0	0	0.167966
2015-12-18 22:15:00	11.51	259.419	97.5008	1.2078	2.03793	1.0584	10.7	0.63	322	0	0	0.335955
2015-12-18 22:30:00	11.46	259.789	97.5243	1.2078	2.03793	1.1088	10.3	0.3	224	0	0	0.167978
2015-12-18 22:45:00	11.54	260.243	97.6937	1.1102	1.88861	1.0458	10.1	0.43	221	0	0.167981	0.335962
2015-12-18 23:00:00	11.57	258.725	97.1881	0.9394	1.62728	1.1151	10.5	1.1	272	0	0	0.167982
2015-12-18 23:15:00	11.33	261.182	97.9706	1.037	1.77661	1.0458	10.1	0.86	344	0	0	0.335965
2015-12-18 23:30:00	11.29	261.176	97.7897	1.1712	1.98194	1.0395	10.1	0.76	297	0	0	0.167983
2015-12-18 23:45:00	11.25	262.038	98.0513	1.1224	1.90727	1.0521	10.1	1.15	295	0	0.167983	0.167983
2015-12-19	11.25	261.371	97.7593	1.0614	1.81394	1.0395	10.2	0.86	280	0	0	0.335965
2015-12-19 00:15:00	11.23	260.477	97.433	1.0248	1.75794	1.1151	10.1	0.35	327	0	0	0.167983
2015-12-19 00:30:00	11.22	260.372	97.3653	1.2078	2.03793	1.0521	10.1	0.82	315	0	0.167983	0.167983
2015-12-19 00:45:00	11.22	260.747	97.5117	1.2078	2.03793	1.1151	10.2	0.63	304	0	0	0.167981
2015-12-19 01:00:00	11.23	260.762	97.5722	0.8296	1.45929	1.0584	9.9	0.49	218	0	0	0.335965
2015-12-19 01:15:00	11.2	259.718	97.0988	0.9516	1.64595	1.1088	10.1	0.09	321	0	0.167983	0.335965
2015-12-19 01:30:00	11.16	259.484	97.1167	1.1346	1.92594	1.0899	10.3	0.15	135	0	0	0.335963
2015-12-19 01:45:00	11.02	259.335	96.9153	0.9028	1.57128	1.0584	10.9	0.82	178	0	0	0.335965
2015-12-19 02:00:00	11.17	257.88	96.2061	1.22	2.0566	1.0332	10.8	0.48	69	0	0	0.335965
2015-12-19 02:15:00	11.37	256.88	96.1195	0.9516	1.64595	1.0206	10.7	0.89	353	0	0	0.335965
2015-12-19 02:30:00	11.28	257.088	96.3024	1.0858	1.85127	1.1214	10.1	1.39	6	0	0	0.335965
2015-12-19 02:45:00	11.3	258.477	96.8429	1.0248	1.75794	1.0206	10.2	0.11	280	0	0	0.335965
2015-12-19 03:00:00	11.42	258.383	96.96	0.9638	1.66461	1.0332	10.3	0.51	252	0	0	0.335964
2015-12-19 03:15:00	11.32	256.12	96.123	1.0248	1.75794	1.071	10.4	0.58	315	0	0	0.335957
2015-12-19 03:30:00	11.28	255.865	95.842	1.0248	1.75794	1.1277	10.4	2.28	9	0	0	0.335952
2015-12-19 03:45:00	11.31	256.572	96.066	0.9394	1.62728	1.0584	10.2	1.69	357	0	0.167976	0.335952
2015-12-19 04:00:00	11.52	260.533	97.6072	0.9028	1.57128	1.0143	10.4	1.6	13	0	0	0.335957
2015-12-19 04:15:00	11.49	252.066	94.619	0.8418	1.47795	1.0143	10.5	0.93	255	0	0	0.335949
2015-12-19 04:30:00	11.44	256.435	96.3126	0.8784	1.53395	1.0458	10.7	0.98	277	0	0	0.335946
2015-12-19 04:45:00	11.49	262.504	98.6376	1.1102	1.88861	1.0584	10.9	0.11	146	0	0	0.335941
2015-12-19 05:00:00	11.44	251.283	94.5278	0.6222	1.14197	1.0206	11	0.38	208	0	0.335941	0.335941
2015-12-19 05:15:00	11.47	251.705	94.5131	0.5978	1.10463	1.1529	11	0.58	312	0	0.335926	0.335926
2015-12-19 05:30:00	11.42	255.7	96.0202	0.7686	1.36596	1.0395	11	0.73	12	0	0.335937	0.335937
2015-12-19 05:45:00	11.41	253.385	95.2038	0.5978	1.10463	1.0143	11.1	0.7	58	0	0	0.335921
2015-12-19 06:00:00	11.46	247.382	92.813	0.7686	1.36596	1.0584	11.1	1.31	12	0	0.335924	0.335924
2015-12-19 06:15:00	11.36	252.284	94.1406	1.1102	1.88861	1.0458	11	1.96	26	0	0	0.33591
2015-12-19 06:30:00	11.37	245.795	91.7502	0.854	1.49662	1.0458	11	1.33	355	0	0.503865	0.33591
2015-12-19 06:45:00	11.39	249.795	93.4975	0.8906	1.55262	1.0269	11.2	1.51	5	0	0	0.335909
2015-12-19 07:00:00	11.44	249.44	93.2758	1.22	2.0566	1.0584	11.1	0.89	213	0	0.335909	0.335909
2015-12-19 07:15:00	11.46	253.536	94.972	1.3542	2.26193	1.0899	11.4	0.35	203	0	0	0.335909
2015-12-19 07:30:00	11.45	257.442	96.3788	1.098	1.86994	1.0584	11.5	0.43	278	0	0	0.335909
2015-12-19 07:45:00	11.45	256.203	95.8947	1.1224	1.90727	1.0584	11.7	0.18	178	3.29116	0.167954	0.335909
2015-12-19 08:00:00	11.44	255.475	95.5324	1.159	1.96327	1.1025	11.8	1.29	85	3.29116	0.503863	0.335909
2015-12-19 08:15:00	11.45	256.308	95.8561	1.1834	2.0006	1.0773	11.8	1.15	240	3.29116	0.335909	0.335909
2015-12-19 08:30:00	11.48	256.196	95.9024	1.0492	1.79528	1.0962	11.7	0.73	66	9.87349	2.01545	1.00773
2015-12-19 08:45:00	11.46	251.676	94.2379	0.915	1.58995	1.0584	11.9	0.56	36	16.4558	3.35909	1.67954
2015-12-19 09:00:00	11.48	254.639	95.5879	0.8906	1.55262	1.0584	11.6	0.11	14	36.2028	5.37454	3.02318
2015-12-19 09:15:00	11.46	255.626	95.6926	0.8906	1.55262	1.0647	12	1.41	120	46.0763	7.89386	4.0309
2015-12-19 09:30:00	11.48	237.54	89.3857	0.7076	1.27263	1.0962	12.1	0.64	122	59.2409	10.245	5.71031
2015-12-19 09:45:00	11.56	232.029	87.4836	0.5856	1.08597	1.0521	12	1.37	97	85.5703	14.108	8.06171
2015-12-19 10:00:00	11.67			0.5734	1.0673	1.0773	12	0.61	352	111.9	18.4746	11.0847
2015-12-19 10:15:00	11.63	231.47	87.3037	0.5246	0.992638	1.0269	11.9	0.49	308	131.647	22.1693	14.1077
2015-12-19 10:30:00	11.73	234.9	88.7766	0.6344	1.16063	1.0458	11.7	1.41	306	144.811	24.1832	15.7862
2015-12-19 10:45:00	11.51	247.756	92.9757	0.6832	1.2353	1.008	11.8	0.46	310	157.976	26.5339	17.8012
2015-12-19 11:00:00	11.42	253.675	94.9942	0.7076	1.27263	1.0017	11.8	0.33	322	157.976	25.6931	17.8005
2015-12-19 11:15:00	11.29	251.235	94.4644	0.793	1.40329	1.0332	12	0.37	206	148.102	24.3494	17.1285
2015-12-19 11:30:00	11.73	260.068	96.8566	0.6222	1.14197	0.9765	12.5	1.44	105	161.267	26.3644	19.1436
2015-12-19 11:45:00	11.73	235.379	88.932	0.6588	1.19796	1.0206	12.4	2.06	97	164.558	26.8682	19.4794
2015-12-19 12:00:00	11.73	235.231	88.8911	0.8052	1.42196	1.071	12.1	2.86	102	190.887	30.0588	22.1663
2015-12-19 12:15:00	11.35	241.895	91.2604	0.7686	1.36596	1.0521	12.1	1.73	78	210.628	34.089	25.1889
2015-12-19 12:30:00	11.38	256.145	95.9835	0.7198	1.29129	0.9954	12.2	2.31	65	236.963	38.623	28.8833
2015-12-19 12:45:00	11.5	256.447	96.1628	0.8296	1.45929	1.0521	12.3	1.8	81	190.884	31.2343	23.3417
2015-12-19 13:00:00	11.62	253.771	95.3215	0.9272	1.60862	1.0584	12.4	2.93	91	177.723	29.2189	21.8302
2015-12-19 13:15:00	11.72	254.806	95.7349	1.0004	1.72061	1.0521	12.4	2.7	88	144.807	24.5172	17.9681
2015-12-19 13:30:00	11.76	255.164	96.0321	1.1224	1.90727	1.1151	12.6	3.29	77	138.228	22.3338	16.4565
2015-12-19 13:45:00	11.82	255.345	96.266	1.1712	1.98194	1.1529	12.6	4.52	79	164.554	26.8674	19.4788
2015-12-19 14:00:00	11.91	256.728	96.5913	1.2078	2.03793	1.2348	12.7	4.87	107	144.811	23.341	16.6242
2015-12-19 14:15:00	11.99	255.44	96.3197	1.1956	2.01927	1.2096	12.7	4.51	83	141.519	23.1732	16.2884
2015-12-19 14:30:00	11.95	253.179	95.4685	1.037	1.77661	1.197	12.7	4.67	89	164.556	26.5315	18.3034
2015-12-19 14:45:00	12.02	256.669	96.7446	1.3664	2.28059	1.26	12.8	3.9	73	118.482	18.9746	12.5937
2015-12-19 15:00:00	11.98	257.288	97.0064	1.22	2.0566	1.1592	12.8	3.48	79	98.7328	16.792	10.7469
2015-12-19 15:15:00	12.02	257.073	96.7128	1.281	2.14993	1.1403	12.7	4.81	78	92.152	15.4485	9.73926
2015-12-19 15:30:00	11.91	257.666	97.0363	1.281	2.14993	1.1592	12.8	3.53	81	46.0763	7.89235	4.86975
2015-12-19 15:45:00	11.89	256.93	96.7899	1.281	2.14993	1.1781	12.8	3.08	70	36.2028	5.54144	3.69429
2015-12-19 16:00:00	11.89	256.315	96.5402	1.464	2.42992	1.1088	12.7	4.65	72	29.6205	5.03765	3.02259
2015-12-19 16:15:00	11.98	256.227	96.438	1.586	2.61658	1.1781	12.6	4.32	88	23.0382	3.86224	2.35093
2015-12-19 16:30:00	11.91	255.498	96.2585	1.5006	2.48592	1.1403	12.6	4.56	77	13.1646	2.35095	1.3434
2015-12-19 16:45:00	11.87	255.333	96.2309	1.5372	2.54192	1.1466	12.6	3.26	69	9.87349	1.3434	1.00755
2015-12-19 17:00:00	11.9	255.215	96.104	1.5494	2.56058	1.1403	12.6	3.06	74	3.29116	0.671704	0.335852
2015-12-19 17:15:00	11.89	254.946	96.0208	1.4274	2.37392	1.1025	12.6	4.17	69	0	0.335852	0.335852
2015-12-19 17:30:00	11.87	254.685	95.9403	1.3542	2.26193	1.1277	12.5	4.03	77	0	0	0.335852
2015-12-19 17:45:00	11.86	254.493	95.8399	1.708	2.80324	1.1781	12.4	4.59	73	0	0	0.335852
2015-12-19 18:00:00	11.8	253.679	95.4194	1.464	2.42992	1.0773	12.4	3.34	98	0	0.167926	0.335852
2015-12-19 18:15:00	11.79	251.01	94.3161	1.3298	2.22459	1.0836	12.3	3.08	87	0	0.167926	0.335852
2015-12-19 18:30:00	11.68	249.688	93.8694	1.2322	2.07527	1.0521	12.3	4.61	72	0	0	0.335852
2015-12-19 18:45:00	11.67	249.396	93.7481	1.22	2.0566	1.0584	12.2	4.07	73	0	0	0.335852
2015-12-19 19:00:00	11.67	248.471	93.3927	1.1346	1.92594	1.0395	12.2	3.85	77	0	0	0.335852
2015-12-19 19:15:00	11.74	249.487	93.7012	1.1834	2.0006	1.0521	12.3	3.41	76	0	0	0.335852
2015-12-19 19:30:00	11.7	249.039	93.5858	1.0248	1.75794	1.0269	12.3	3.87	73	0	0.167926	0.335852
2015-12-19 19:45:00	11.69	248.2	93.2394	0.854	1.49662	1.0395	12.3	4.86	73	0	0.167926	0.335852
2015-12-19 20:00:00	11.69	249.936	93.9349	1.1834	2.0006	1.0458	12.2	3.5	76	0	0	0.335858
2015-12-19 20:15:00	11.72	249.535	93.7367	1.22	2.0566	1.0332	12	4.53	78	3.29116	0	0.335853
2015-12-19 20:30:00	11.75	249.769	93.8359	1.1346	1.92594	1.071	12	2.47	68	0	0	0.335852
2015-12-19 20:45:00	11.78	251.474	94.5075	1.3054	2.18726	1.071	12.2	2.49	69	0	0	0.335852
2015-12-19 21:00:00	11.77	251.33	94.4887	1.464	2.42992	1.1088	12.3	1.93	66	0	0	0.335856
2015-12-19 21:15:00	11.75	252.278	94.7979	1.464	2.42992	1.1466	12.4	4.22	94	0	0	0.335855
2015-12-19 21:30:00	11.76	251.761	94.5602	1.342	2.24326	1.0962	12.4	3.26	78	0	0	0.335853
2015-12-19 21:45:00	11.67	251.822	94.7201	1.6592	2.72858	1.0899	12.4	4.16	72	0	0	0.335852
2015-12-19 22:00:00	11.62	253.427	95.0348	1.22	2.0566	1.0836	12.2	4.43	81	0	0.167927	0.335854
2015-12-19 22:15:00	11.55	253.253	94.9006	1.1102	1.88861	1.1151	12	3.87	80	0	0.335853	0.335853
2015-12-19 22:30:00	11.55	252.421	94.599	1.1224	1.90727	1.1151	11.9	4.41	81	3.29116	0	0.335852
2015-12-19 22:45:00	11.5	252.584	94.6329	1.1102	1.88861	1.1529	11.8	2.56	73	0	0	0.335852
2015-12-19 23:00:00	11.53	253.364	94.907	1.2444	2.09393	1.1025	11.9	1.62	130	0	0	0.335857
2015-12-19 23:15:00	11.52	255.621	95.7647	1.3542	2.26193	1.1151	11.8	2.02	80	0	0	0.335854
2015-12-19 23:30:00	11.52	254.15	95.2194	1.1346	1.92594	1.0458	11.9	4.16	100	3.29116	0	0.335852
2015-12-19 23:45:00	11.44	256.612	96.0973	1.4152	2.35526	1.1466	11.8	4.98	87	0	0.335853	0.335853
2015-12-20	11.34	255.835	95.8257	1.3542	2.26193	1.1277	11.8	4.53	88	0	0	0.335858
2015-12-20 00:15:00	11.46	256.16	95.6966	1.1224	1.90727	1.0773	11.8	3.74	93	0	0.167928	0.335857
2015-12-20 00:30:00	11.51	251.748	94.1201	0.9394	1.62728	1.0332	11.8	5.02	95	0	0.167931	0.335861
2015-12-20 00:45:00	11.54	256.331	95.7236	1.0858	1.85127	1.0899	11.8	3.6	91	0	0	0.335856
2015-12-20 01:00:00	11.51	254.237	95.053	1.0126	1.73928	1.0521	11.7	3.38	79	0	0.335874	0.335874
2015-12-20 01:15:00	11.44	254.506	95.2498	1.1224	1.90727	1.0836	11.7	3.02	89	0	0.33587	0.33587
2015-12-20 01:30:00	11.53	252.207	94.3762	0.976	1.68328	1.0395	11.8	2.28	74	0	0	0.167935
2015-12-20 01:45:00	11.55	246.63	92.4287	0.9028	1.57128	1.1025	11.8	2.07	71	0	0	0.167934
2015-12-20 02:00:00	11.5	246.4	92.4166	1.0126	1.73928	1.1025	11.8	2.65	101	0	0.167937	0.335874
2015-12-20 02:15:00	11.48	249.406	93.4511	1.0614	1.81394	1.1592	11.9	0.71	127	0	0.167936	0.335872
2015-12-20 02:30:00	11.33	251.71	94.199	0.915	1.58995	1.0395	11.9	4.04	89	0	0	0.335878
2015-12-20 02:45:00	11.37	253.458	94.9354	1.1956	2.01927	1.1403	11.9	3.91	77	0	0.16794	0.16794
2015-12-20 03:00:00	11.45	252.285	94.493	1.2078	2.03793	1.134	12	3.64	93	0	0.16794	0.335879
2015-12-20 03:15:00	11.46	252.725	94.675	1.159	1.96327	1.134	12	1.92	54	0	0.167934	0.335867
2015-12-20 03:30:00	11.49	252.755	94.641	1.1956	2.01927	1.0836	12	2.17	72	0	0	0.335872
2015-12-20 03:45:00	11.55	244.598	91.6234	0.915	1.58995	1.071	12.1	1.23	89	0	0.167939	0.335877
2015-12-20 04:00:00	11.6	239.034	89.6169	0.7198	1.29129	1.0269	12.1	1.52	70	0	0.167933	0.335867
2015-12-20 04:15:00	11.6	243.441	91.2994	1.1468	1.9446	1.0836	12.2	2.67	91	0	0	0.335869
2015-12-20 04:30:00	11.63	248.081	93.0216	1.22	2.0566	1.071	12.2	2.37	97	0	0	0.335861
2015-12-20 04:45:00	11.64	244.426	91.6686	0.9882	1.70195	1.1151	12.3	2.97	56	0	0	0.335855
2015-12-20 05:00:00	11.62	247.01	92.6317	1.1712	1.98194	1.0899	12.3	1.53	74	0	0.167931	0.335863
2015-12-20 05:15:00	11.64	246.253	92.3304	1.0126	1.73928	1.0521	12.1	1.13	254	0	0.167927	0.167927
2015-12-20 05:30:00	11.64	241.487	90.5811	1.0248	1.75794	1.0647	12	1.3	340	0	0	0.335869
2015-12-20 05:45:00	11.64	247.609	92.8598	1.1224	1.90727	1.1529	12	0.99	348	0	0	0.335859
2015-12-20 06:00:00	11.64	243.302	91.2373	0.9028	1.57128	1.0647	12	0.4	7	0	0.167927	0.335853
2015-12-20 06:15:00	11.67	241.36	90.5862	0.8052	1.42196	1.0521	12.3	2.34	76	0	0	0.335855
2015-12-20 06:30:00	11.63	241.455	90.5902	1.0736	1.83261	1.071	12.5	3.39	95	0	0	0.335852
2015-12-20 06:45:00	11.62	245.017	91.6196	0.9394	1.62728	1.0899	12.6	3.92	80	0	0	0.335859
2015-12-20 07:00:00	11.54	238.764	89.4459	0.8174	1.44062	1.0899	12.6	5.27	77	0	0	0.335853
2015-12-20 07:15:00	11.39	237.917	89.0925	0.854	1.49662	1.0584	12.6	4.49	101	0	0	0.335852
2015-12-20 07:30:00	11.32	245.574	91.7637	0.8662	1.51529	1.0584	12.5	4.5	82	0	0	0.335854
2015-12-20 07:45:00	11.3	241.223	90.2791	0.7442	1.32863	1.0584	12.5	3.79	86	0	0	0.335852
2015-12-20 08:00:00	11.3	241.691	90.5049	0.6954	1.25396	1.0332	12.5	4.68	86	0	0	0.335854
2015-12-20 08:15:00	11.29	244.553	91.525	0.7076	1.27263	1.0647	12.5	3.75	96	0	0.503779	0.335852
2015-12-20 08:30:00	11.3	245.289	91.7947	0.7808	1.38462	1.071	12.5	1.81	122	6.58233	1.51134	1.00756
2015-12-20 08:45:00	11.42	243.421	91.1537	0.6954	1.25396	1.0899	12.5	0.68	148	9.87349	2.18304	1.34341
2015-12-20 09:00:00	11.6	232.173	86.929	0.5734	1.0673	1.071	12.5	0.95	200	19.747	3.35852	2.01511
2015-12-20 09:15:00	11.67	234.218	87.7031	0.7686	1.36596	1.0521	12.6	0.21	94	49.3674	8.90009	4.70193
2015-12-20 09:30:00	11.7	243.573	91.3879	0.9516	1.64595	1.0395	12.6	0.84	61	26.3293	5.03779	3.02267
2015-12-20 09:45:00	11.7	244.906	91.9206	1.0126	1.73928	1.0521	12.6	0.98	256	36.2028	6.54914	4.03024
2015-12-20 10:00:00	11.7	245.845	92.2728	1.0614	1.81394	1.071	12.7	0.26	165	69.1144	12.9303	8.06046
2015-12-20 10:15:00	11.71	246.247	92.4237	0.976	1.68328	1.0584	12.8	1.58	47	59.2409	11.419	7.22082
2015-12-20 10:30:00	11.71	246.18	92.418	1.0858	1.85127	1.0899	12.7	1.61	111	42.7851	7.89253	5.20571
2015-12-20 10:45:00	11.72	247.47	92.9215	1.0858	1.85127	1.1025	12.8	1.33	94	75.6968	13.7699	9.23594
2015-12-20 11:00:00	11.64	247.818	93.0955	1.0248	1.75794	1.0836	12.9	1.69	119	69.1144	12.0907	8.39631
2015-12-20 11:15:00	11.36	254.593	95.2704	1.0248	1.75794	1.008	12.9	1.96	73	75.6968	13.4341	9.40386
2015-12-20 11:30:00	11.36	239.207	89.641	0.6588	1.19796	1.0206	12.9	0.54	220	167.849	28.2116	20.487
2015-12-20 11:45:00	11.21	246.434	92.0899	0.7564	1.34729	1.0773	13	1.33	64	62.5321	11.9228	8.39631
2015-12-20 12:00:00	11.23	248.237	92.8059	0.8174	1.44062	1.008	13.3	0.99	111	115.191	19.9832	14.7775
2015-12-20 12:15:00	11.41	248.661	92.952	0.6832	1.2353	1.0332	13.4	0.3	338	108.608	19.6474	14.4416
2015-12-20 12:30:00	11.51	250.742	93.4125	0.6466	1.1793	1.0269	13.3	1.13	291	69.1144	13.0982	9.73966
2015-12-20 12:45:00	11.68	250.361	93.5073	0.5734	1.0673	0.9954	13.2	0.74	288	98.7341	17.9678	13.4339
2015-12-20 13:00:00	11.75	252.788	94.8912	0.8662	1.51529	1.0395	13.5	1.05	251	75.6938	13.937	10.4108
2015-12-20 13:15:00	11.58	256.454	96.2099	0.549	1.02997	1.0017	13.6	0.17	68	88.8611	15.7837	11.9217
2015-12-20 13:30:00	11.58	249.281	93.6436	0.6832	1.2353	1.0269	13.6	0.19	323	115.191	20.316	14.7753
2015-12-20 13:45:00	11.67	253.233	94.9477	1.0004	1.72061	1.0647	13.6	0.42	305	121.773	21.9949	15.9505
2015-12-20 14:00:00	11.75	256.983	96.5729	1.1468	1.9446	1.0647	13.8	0.93	295	115.189	20.6516	14.7752
2015-12-20 14:15:00	11.78	255.061	95.8651	1.4152	2.35526	1.071	13.6	0.29	334	88.8595	15.2789	10.7456
2015-12-20 14:30:00	11.75	251.511	94.3972	1.4152	2.35526	1.197	13.7	0.29	252	82.2789	15.2787	10.7455
2015-12-20 14:45:00	11.74	252.221	94.5826	1.3664	2.28059	1.1025	14	1.36	102	121.772	22.1625	14.775
2015-12-20 15:00:00	11.82	251.798	94.6076	1.4274	2.37392	1.0962	14.2	1.95	109	82.2773	14.775	9.57019
2015-12-20 15:15:00	11.82	251.62	94.5616	1.6226	2.67258	1.1592	14.3	2.33	88	75.6919	14.1035	8.73074
2015-12-20 15:30:00	11.87	250.48	93.9577	1.647	2.70991	1.134	14.4	2.9	95	49.3647	9.23446	5.54067
2015-12-20 15:45:00	11.87	248.531	93.475	1.8056	2.95257	1.1214	14.4	2.7	90	36.1992	7.72344	4.36542
2015-12-20 16:00:00	11.87	250.498	94.0452	1.5738	2.59791	1.1088	14.6	0.3	114	69.106	12.9283	7.05181
2015-12-20 16:15:00	11.86	246.015	92.3478	1.6226	2.67258	1.134	14.7	2.57	95	36.2002	7.38783	4.02973
2015-12-20 16:30:00	11.87	244.632	91.6783	1.6226	2.67258	1.1466	14.8	1.56	95	26.3275	5.03699	2.8543
2015-12-20 16:45:00	11.87	244.163	91.5214	1.8788	3.06456	1.1214	14.8	1.54	95	13.1634	2.85434	1.67903
2015-12-20 17:00:00	11.85	239.963	90.2512	1.708	2.80324	1.1403	15	3.41	159	0	1.34319	0.839492
2015-12-20 17:15:00	11.86	240.704	90.5503	1.8666	3.0459	1.1529	15	2.86	166	0	0.335801	0.335801
2015-12-20 17:30:00	11.87	241.885	91.0131	1.586	2.61658	1.1529	15	2.74	133	0	0	0.335798
2015-12-20 17:45:00	11.85	241.047	90.711	1.3664	2.28059	1.1025	15	3.57	138	0	0	0.335804
2015-12-20 18:00:00	11.83	233.69	87.8226	1.3298	2.22459	1.071	15	2	152	0	0	0.335797
2015-12-20 18:15:00	11.77	228.663	85.7914	1.464	2.42992	1.0836	15	2.33	167	0	0	0.335801
2015-12-20 18:30:00	11.7	228.841	85.9723	1.5494	2.56058	1.0962	15	1.97	148	0	0	0.335798
2015-12-20 18:45:00	11.78	230.207	86.5007	1.5372	2.54192	1.0962	15	2.19	138	0	0	0.335798
2015-12-20 19:00:00	11.54	227.204	85.1763	0.6222	1.14197	1.0899	15	0.74	124	0	0	0.335804
2015-12-20 19:15:00	11.28	238.168	88.9901	0.6832	1.2353	1.0332	15	0.82	154	0	0.167899	0.335799
2015-12-20 19:30:00	11.1	242.353	90.5145	0.7564	1.34729	1.008	15	1.4	166	0	0	0.335796
2015-12-20 19:45:00	11.01	241.638	90.1157	0.6588	1.19796	0.9639	15	3.6	135	0	0.167903	0.335805
2015-12-20 20:00:00	10.98	242.213	90.2354	0.6466	1.1793	0.9702	15	4.36	162	0	0	0.335801
2015-12-20 20:15:00	10.95	242.151	90.2309	0.8052	1.42196	0.9765	14.9	2.12	145	0	0	0.335802
2015-12-20 20:30:00	11.07	241.922	90.2063	0.732	1.30996	0.9639	14.9	4.61	161	0	0	0.3358
2015-12-20 20:45:00	10.97	243.395	90.7624	0.7686	1.36596	0.9513	15	2.44	166	0	0	0.335798
2015-12-20 21:00:00	10.98	243.526	90.7637	0.7564	1.34729	0.9576	15	2.49	134	0	0.1679	0.335801
2015-12-20 21:15:00	10.96	244.26	91.0546	0.8296	1.45929	0.9639	14.9	1.67	134	0	0.167899	0.335798
2015-12-20 21:30:00	10.97	245.72	91.5813	0.9272	1.60862	0.9954	15	0.88	158	0	0	0.335803
2015-12-20 21:45:00	10.97	245.568	91.5485	0.793	1.40329	0.9828	15	1.75	142	0	0.1679	0.335799
2015-12-20 22:00:00	10.98	244.272	91.0599	0.8052	1.42196	1.008	15	2.08	145	0	0	0.335798
2015-12-20 22:15:00	11.06	243.638	90.8628	0.9394	1.62728	1.0206	15	0.44	153	0	0	0.335796
2015-12-20 22:30:00	11.02	245.326	91.5073	0.8296	1.45929	1.008	15	1.68	172	0	0	0.167898
2015-12-20 22:45:00	11.04	245.216	91.4591	0.9028	1.57128	0.9954	14.9	2.02	140	0	0	0.335801
2015-12-20 23:00:00	11.1	244.624	91.2628	0.8418	1.47795	0.9828	14.9	1.52	130	0	0.167901	0.335802
2015-12-20 23:15:00	11.2	241.988	90.4778	0.793	1.40329	0.9639	14.9	1.44	163	0	0	0.335799
2015-12-20 23:30:00	11.28	235.335	88.1856	0.6588	1.19796	1.008	14.9	1.3	146	0	0	0.335796
2015-12-20 23:45:00	11.16	241.321	90.162	0.9882	1.70195	1.0017	15	2.04	109	0	0	0.335797
2015-12-21	11.08	245.39	91.5593	0.8906	1.55262	1.0269	14.9	0.99	186	0	0.167898	0.167898
2015-12-21 00:15:00	11.08	245.102	91.4956	0.8906	1.55262	1.0269	14.9	2.35	141	0	0	0.3358
2015-12-21 00:30:00	11.09	244.435	91.2666	1.0004	1.72061	0.9954	14.9	0.7	138	0	0.167899	0.335798
2015-12-21 00:45:00	11.09	241.906	90.3234	0.8784	1.53395	1.0143	14.9	0.95	161	0	0	0.335811
2015-12-21 01:00:00	11.13	238.778	89.1502	0.7076	1.27263	0.9765	14.9	0.74	146	0	0	0.335798
2015-12-21 01:15:00	11.14	237.914	88.8614	0.7442	1.32863	0.9828	14.9	2.02	156	0	0.167902	0.335803
2015-12-21 01:30:00	11.15	238.952	89.2792	0.7442	1.32863	0.9765	14.9	1.85	137	0	0	0.335798
2015-12-21 01:45:00	11.13	237.359	88.7006	0.8418	1.47795	0.9891	14.8	0.76	166	0	0	0.335804
2015-12-21 02:00:00	11.06	240.927	89.9748	0.915	1.58995	0.9891	14.8	1.54	156	0	0.167901	0.335801
2015-12-21 02:15:00	11.08	242.74	90.5571	0.976	1.68328	1.0269	14.7	2.64	155	0	0	0.335796
2015-12-21 02:30:00	11.05	243.072	90.7642	0.9882	1.70195	1.0143	14.8	1.2	141	0	0	0.335809
2015-12-21 02:45:00	10.98	242.256	90.3699	0.8052	1.42196	0.9765	14.9	1.42	133	0	0	0.335797
2015-12-21 03:00:00	10.98	240.046	89.5146	0.671	1.21663	1.0962	14.9	1.3	153	0	0	0.335807
2015-12-21 03:15:00	10.97	237.823	88.7037	0.5612	1.04864	1.0017	14.8	3	138	0	0	0.167902
2015-12-21 03:30:00	10.97	241.49	90.0229	0.6222	1.14197	0.9576	14.8	1.01	129	0	0	0.335803
2015-12-21 03:45:00	10.99	242.432	90.4308	0.7686	1.36596	0.9513	14.9	1.23	181	0	0	0.335801
2015-12-21 04:00:00	11.06	240.505	89.6487	0.793	1.40329	1.1025	14.9	0.7	156	0	0.1679	0.335801
2015-12-21 04:15:00	11.04	239.959	89.5851	0.732	1.30996	1.0143	14.9	1.11	147	0	0	0.335798
2015-12-21 04:30:00	11.11	238.562	89.1193	0.7198	1.29129	0.9639	14.9	2.51	144	0	0.1679	0.335801
2015-12-21 04:45:00	11.16	239.571	89.2999	0.7442	1.32863	0.9639	15	2.55	151	0	0.1679	0.3358
2015-12-21 05:00:00	11.2	241.179	89.9634	0.8174	1.44062	1.0143	14.9	1.18	172	0	0.167905	0.335809
2015-12-21 05:15:00	11.23	239.345	89.3446	0.793	1.40329	1.0332	14.9	1.16	139	0	0.167904	0.335808
2015-12-21 05:30:00	11.29	234.553	87.577	0.8174	1.44062	1.1088	14.9	0.89	164	0	0	0.167901
2015-12-21 05:45:00	11.31	230.7	86.2342	0.8418	1.47795	1.0269	15	1.26	205	0	0	0.335808
2015-12-21 06:00:00	11.35	226.574	84.8242	0.7686	1.36596	0.9639	15	1.65	152	0	0.167899	0.335797
2015-12-21 06:15:00	11.35	214.864	80.5886	0.7686	1.36596	1.0206	14.8	1.25	172	0	0.167901	0.335802
2015-12-21 06:30:00	11.35	211.334	79.27	0.7564	1.34729	1.0584	14.9	0.6	213	0	0	0.167898
2015-12-21 06:45:00	11.35	212.53	79.6466	0.6954	1.25396	0.9954	14.9	2.41	200	0	0	0.335796
2015-12-21 07:00:00	11.37	208.845	78.2992	0.7442	1.32863	1.0143	15	0.93	183	0	0.335796	0.335796
2015-12-21 07:15:00	11.36	213.723	80.1315	0.6832	1.2353	1.0206	14.9	0.85	163	0	0	0.335798
2015-12-21 07:30:00	11.32	216.694	81.2097	0.7442	1.32863	0.9891	14.9	0.1	141	0	0	0.335798
2015-12-21 07:45:00	11.35	219.35	82.2225	0.732	1.30996	1.0269	15	1.06	119	0	0	0.335798
2015-12-21 08:00:00	11.17	221.079	82.7346	0.7076	1.27263	1.0269	15	1.21	143	0	0.335796	0.503694
2015-12-21 08:15:00	11.15	233.442	87.1488	0.6222	1.14197	0.9954	15	0.92	137	0	1.17529	0.839492
2015-12-21 08:30:00	11.11	232.236	86.792	0.6588	1.19796	0.9576	15	1.51	145	6.58118	3.69387	1.84693
2015-12-21 08:45:00	11.11	239.922	89.6104	0.7198	1.29129	1.0521	14.9	1.23	161	19.7433	6.71596	3.35798
2015-12-21 09:00:00	11.05	243.054	90.7114	0.8418	1.47795	0.9765	14.8	1.56	97	19.7437	6.04441	3.0222
2015-12-21 09:15:00	11.11	244.461	91.227	0.7686	1.36596	0.9765	14.8	0.65	124	59.2327	10.5777	5.20489
2015-12-21 09:30:00	11.14	246.293	91.9871	0.8174	1.44062	1.1907	14.7	0.63	139	88.8471	16.7901	8.56297
2015-12-21 09:45:00	11.13	245.537	91.7794	0.7808	1.38462	0.9954	15	0.56	131	108.587	17.7972	9.5702
2015-12-21 10:00:00	11.28	244.049	91.3695	0.7198	1.29129	0.9702	14.9	0.36	116	161.244	22.6662	12.5923
2015-12-21 10:15:00	11.24	245.294	91.8534	0.854	1.49662	1.0269	15.1	0.84	89	253.371	28.3752	15.6148
2015-12-21 10:30:00	11.29	251.335	94.0771	0.8662	1.51529	0.9828	15.3	0.71	139	470.514	48.6905	28.7106
2015-12-21 10:45:00	11.31	250.312	93.7563	0.793	1.40329	1.0395	14.7	2.64	104	338.903	44.493	27.5353
2015-12-21 11:00:00	11.29	250.823	93.9562	0.6954	1.25396	0.9765	14.1	1.92	74	753.447	58.4285	33.7475
2015-12-21 11:15:00	11.42	243.35	91.331	0.6588	1.19796	0.9639	13.9	2.75	69	174.375	30.5574	20.1478
2015-12-21 11:30:00	11.48	239.364	89.9286	0.6222	1.14197	0.9639	13.4	1.63	353	92.1223	18.8046	13.096
2015-12-21 11:45:00	11.58	237.263	89.2418	0.6466	1.1793	1.0899	13.5	1.13	330	164.504	30.2216	20.6515
2015-12-21 12:00:00	11.61	238.499	89.7828	0.6954	1.25396	0.9765	13.5	0.48	317	302.688	50.8728	35.5942
2015-12-21 12:15:00	11.63	241.02	90.7715	0.7198	1.29129	0.9576	14.1	1.03	115	579.055	71.5235	47.8502
2015-12-21 12:30:00	11.66	244.604	92.1073	0.5978	1.10463	0.9891	14.4	1.15	0	1049.54	95.5335	61.2824
2015-12-21 12:45:00	11.64	244.561	92.1782	0.6466	1.1793	0.9765	14.8	1.28	39	931.093	90.4936	59.7694
2015-12-21 13:00:00	11.66	248.602	93.7399	0.6222	1.14197	0.9513	14.5	2.56	340	1049.54	83.0969	52.3762
2015-12-21 13:15:00	11.66	251.288	94.7772	0.8418	1.47795	0.9513	14.1	1.62	10	473.76	55.9001	37.2667
2015-12-21 13:30:00	11.72	247.87	93.5266	0.8784	1.53395	0.9828	14.3	1.71	37	555.972	71.5123	48.0106
2015-12-21 13:45:00	11.76	238.837	90.1974	0.8174	1.44062	1.0143	14.2	2.52	19	414.51	63.119	42.6389
2015-12-21 14:00:00	11.83	238.813	90.2714	0.793	1.40329	0.9639	14	2.46	17	351.993	61.6043	41.797
2015-12-21 14:15:00	11.89	234.986	88.9659	0.8784	1.53395	0.9954	14.2	2.44	16	631.643	67.9799	42.97
2015-12-21 14:30:00	11.9	236.889	89.6906	0.7442	1.32863	0.9765	14.4	2.17	26	618.445	61.2663	37.5991
2015-12-21 14:45:00	11.9	238.329	90.2003	0.8418	1.47795	1.008	14.7	1.48	15	552.635	58.5786	35.2479
2015-12-21 15:00:00	12.01	242.453	91.6995	0.9394	1.62728	1.0017	15.2	1.06	348	476.966	52.1989	30.883
2015-12-21 15:15:00	12.02	242.208	91.6385	0.8174	1.44062	0.9954	15.4	0.39	327	430.865	45.6529	25.8476
2015-12-21 15:30:00	11.88	244.825	92.6319	1.037	1.77661	1.0836	15.2	2.37	26	351.923	37.7644	20.8124
2015-12-21 15:45:00	11.86	239.905	90.7259	0.8784	1.53395	1.0206	14.9	1.78	42	279.565	30.7113	16.1108
2015-12-21 16:00:00	11.87	239.496	90.6385	0.8662	1.51529	0.9702	14.9	2.93	85	200.629	24.5009	12.4183
2015-12-21 16:15:00	11.97	243.338	92.0803	0.9272	1.60862	1.008	14.5	2.87	90	148.005	18.9629	9.06193
2015-12-21 16:30:00	12.18	242.819	91.8984	0.8784	1.53395	1.0143	14.4	2.81	76	108.537	13.4251	6.04128
2015-12-21 16:45:00	12.26	252.572	96.0873	1.0858	1.85127	1.0143	14.1	1.98	88	52.624	7.88744	3.85981
2015-12-21 17:00:00	12.3	248.657	94.5035	0.976	1.68328	0.9702	14.4	1.78	110	23.023	3.69231	2.01399
2015-12-21 17:15:00	12.3	249.353	94.8526	1.1224	1.90727	1.0269	14.2	2.05	106	3.289	1.17488	0.839203
2015-12-21 17:30:00	12.36	249.317	94.7819	1.098	1.86994	0.9954	14.1	1.89	113	0	0.167855	0.335711
2015-12-21 17:45:00	12.29	250.332	95.1755	1.2566	2.1126	1.0458	13.9	2.75	106	0	0	0.335737
2015-12-21 18:00:00	12.31	248.903	94.6497	1.281	2.14993	0.9891	13.4	1.05	79	0	0	0.335739
2015-12-21 18:15:00	12.35	251.195	95.6422	1.1346	1.92594	0.9891	13.1	0.16	89	0	0	0.335739
2015-12-21 18:30:00	12.4	250.607	95.4831	1.3786	2.29926	0.9954	12.8	0.27	149	0	0	0.335754
2015-12-21 18:45:00	12.4	251.057	95.6674	1.0492	1.79528	0.9954	13	0.3	276	0	0	0.335792
2015-12-21 19:00:00	12.27	250.456	95.4372	1.22	2.0566	0.9954	13	0.34	152	0	0.167898	0.335796
2015-12-21 19:15:00	12.38	247.824	94.415	1.1956	2.01927	1.008	12.8	1.15	334	0	0.335801	0.167901
2015-12-21 19:30:00	12.3	244.1	92.5663	0.9882	1.70195	1.0017	12.5	2.37	23	0	0	0.1679
2015-12-21 19:45:00	12.14	243.654	92.3708	1.1468	1.9446	1.008	12.4	2.54	21	0	0.167899	0.335797
2015-12-21 20:00:00	12.14	245.003	92.919	1.281	2.14993	1.0458	12.3	1.23	16	0	0	0.167908
2015-12-21 20:15:00	12.14	239.21	90.7204	1.342	2.24326	1.0458	12.1	0.41	219	0	0	0.335828
2015-12-21 20:30:00	12.13	241.485	91.5924	1.22	2.0566	1.0206	12.2	0.72	249	0	0	0.335847
2015-12-21 20:45:00	12.13	240.581	91.2619	1.1102	1.88861	1.0458	12.3	0.82	233	0	0.167926	0.167926
2015-12-21 21:00:00	12.09	238.099	90.3605	0.9882	1.70195	0.9954	12.3	1.55	304	0	0	0.335852
2015-12-21 21:15:00	12.09	236.11	89.4452	1.0004	1.72061	0.9954	12.3	0.64	245	0	0.167926	0.335852
2015-12-21 21:30:00	12.13	238.831	90.3541	0.793	1.40329	1.0017	12.4	0.58	283	0	0	0.167926
2015-12-21 21:45:00	12.04	241.626	91.6957	1.0248	1.75794	1.0206	12.4	0.93	282	0	0.167926	0.335852
2015-12-21 22:00:00	11.95	238.234	90.2533	0.8906	1.55262	1.0017	11.8	0.85	17	0	0	0.335852
2015-12-21 22:15:00	11.82	236.324	89.4285	0.854	1.49662	1.0269	11.8	0.85	252	0	0	0.335852
2015-12-21 22:30:00	11.96	233.581	88.2634	0.6832	1.2353	0.9954	11.6	0.99	270	0	0	0.167926
2015-12-21 22:45:00	11.99	235.615	89.2462	0.9394	1.62728	1.0143	11.6	0.58	289	0	0.335852	0.335852
2015-12-21 23:00:00	11.87	241.401	91.0292	0.8174	1.44062	1.008	11.6	0.82	288	0	0	0.335863
2015-12-21 23:15:00	11.84	237.133	89.53	0.7198	1.29129	1.0269	11.4	0.41	218	0	0.335866	0.335866
2015-12-21 23:30:00	11.84	241.514	91.1786	1.22	2.0566	1.0395	11.5	0.69	259	0	0	0.33589
2015-12-21 23:45:00	11.84	246.886	93.129	1.2078	2.03793	1.0332	11.4	1.23	280	0	0	0.16795
2015-12-22	11.8	244.735	92.3546	1.1346	1.92594	1.0521	11.2	0.34	241	0	0.335902	0.167951
2015-12-22 00:15:00	11.79	244.67	92.2532	1.0858	1.85127	1.0269	11.2	0.5	276	0	0.335908	0.335908
2015-12-22 00:30:00	11.87	245.829	92.6898	1.0614	1.81394	1.0962	11.2	0.39	179	0	0.167954	0.335909
2015-12-22 00:45:00	11.89	244.48	92.1883	0.9882	1.70195	1.0395	11.7	0.5	245	0	0	0.335909
2015-12-22 01:00:00	11.8	242.221	91.3751	1.037	1.77661	1.0521	11.3	1.07	304	0	0	0.167954
2015-12-22 01:15:00	11.86	242.148	91.3574	1.0858	1.85127	1.0206	11.3	1.31	301	0	0	0.335909
2015-12-22 01:30:00	11.96	240.716	90.8902	1.1102	1.88861	1.0269	11.1	0.58	250	0	0.167954	0.335909
2015-12-22 01:45:00	11.89	242.302	91.6411	0.9638	1.66461	1.1151	10.6	0.47	224	0	0	0.167955
2015-12-22 02:00:00	11.78	240.758	90.7772	1.0248	1.75794	1.1592	10.5	0.9	253	0	0	0.335909
2015-12-22 02:15:00	11.69	237.344	89.476	0.8052	1.42196	1.0017	10.2	0.81	250	0	0	0.335925
2015-12-22 02:30:00	11.67	239.555	90.2767	0.5734	1.0673	0.9891	10.3	0.2	286	0	0	0.167968
2015-12-22 02:45:00	11.58	236.855	89.371	0.5856	1.08597	1.0647	10.1	0.35	226	0	0	0.335942
2015-12-22 03:00:00	11.41	238.702	89.8835	0.7564	1.34729	1.0899	10.8	0.41	315	0	0	0.335949
2015-12-22 03:15:00	11.35	243.777	91.5303	0.8662	1.51529	1.0773	10.8	0.21	174	0	0	0.335962
2015-12-22 03:30:00	11.35	246.542	92.4147	0.732	1.30996	1.0521	11.8	0.97	147	0	0.335965	0.335965
2015-12-22 03:45:00	11.26	245.12	92.0913	0.6832	1.2353	1.0143	11.8	0.87	123	0	0.167983	0.167983
2015-12-22 04:00:00	11.24	241.687	90.5547	0.5368	1.0113	1.0647	11.7	0.35	72	0	0	0.335953
2015-12-22 04:15:00	11.3	238.067	89.1145	0.5856	1.08597	1.0395	11.8	0.12	19	0	0.16797	0.16797
2015-12-22 04:30:00	11.35	240.922	90.367	0.6222	1.14197	1.134	11.7	0.46	245	0	0	0.167966
2015-12-22 04:45:00	11.28	235.334	88.3921	0.5978	1.10463	1.1025	11.7	0.17	8	0	0	0.335913
2015-12-22 05:00:00	11.29	240.298	90.0124	0.5978	1.10463	0.9891	11.4	0.25	24	0	0.335911	0.167955
2015-12-22 05:15:00	11.32	241.031	90.2732	0.5734	1.0673	0.9828	11.3	0.48	85	0	0.335909	0.335909
2015-12-22 05:30:00	11.51	240.556	90.0543	0.5978	1.10463	1.0962	11.3	0.87	4	0	0.335909	0.335909
2015-12-22 05:45:00	11.55	239.429	89.7924	0.7564	1.34729	1.0899	11.4	0.67	22	0	0	0.503863
2015-12-22 06:00:00	11.61	238.589	89.6819	0.8906	1.55262	1.0143	11.5	0.72	18	0	0.167954	0.335909
[truncated: 18,979 more rows]

## Sheet: Nutrients 2015
Date	PO4	Si(OH)4	NO2	NO3+NO2	NO3
2015-01-08	0.0125	12.155	0.1185	1.18375	1.06525
2015-01-15	0.01	8.51	0.037	0.51375	0.47675
2015-01-22	0.01	8.335	0.073	0.89375	0.82075
2015-01-29	0.01	7.43	0.0645	0.58875	0.52425
2015-02-05	0.01	6.935	0.046	0.75375	0.70775
2015-02-12	0.0512	5.788	0.068	0.798	0.73
2015-02-19	0.0322	6.938	0.037	0.558	0.521
2015-02-26	0.0282	2.858	0.062	1.248	1.186
2015-03-05	0.0282	2.268	0.032	0.658	0.626
2015-03-12	0.0292	1.958	0.053	0.748	0.695
2015-03-19	0.0822	2.048	0.075	6.088	6.013
2015-03-26	0.0312	2.568	0.06	0.978	0.918
2015-04-02	0.0412	1.998	0.022	0.978	0.956
2015-04-09	0.0282	2.928	0.054	1.008	0.954
2015-04-16	0.0342	1.088	0.088	0.978	0.89
2015-04-23	0.0212	0.798	0.111	1.448	1.337
2015-04-30	0.0212	2.618	0.058	1.088	1.03
2015-05-06	0.0252	1.808	0.066	1.008	0.942
2015-05-12	0.0272	0.458	0.023	0.308	0.285

## Sheet: Nutrients 2016
Date	PO4	Si(OH)4	NO2	NO3+NO2	NO3
2016-01-12	0.165667	3.33	0.130667	2.14667	2.016
2016-01-19	0.0466667	3.93	0.211667	1.69667	1.485
2016-01-26	0.0596667	4.63	0.202667	3.08667	2.884
2016-02-02	0.0986667	3.56	0.252667	2.90667	2.654
2016-02-09	0.0356667	2.89	0.105667	0.796667	0.691
2016-02-16	0.0186667	2.61	0.0396667	0.426667	0.387
2016-02-23	0.0256667	1.74	0.0586667	0.696667	0.638
2016-03-02	0.0496667	2.48	0.0876667	1.50667	1.419
2016-03-08	0.0106667	2.13	0.0586667	0.436667	0.378
2016-03-15	0.01	2.07	0.0336667	1.23667	1.203
2016-03-21	0.29	1.57	0.0916667	1.60667	1.515
2016-03-30	0.0146667	1.89	0.0576667	1.28667	1.229
2016-04-05	0.0766667	2.21	0.144667	3.22667	3.082
2016-04-12	0.0696667	2.07	0.150667	1.15667	1.006
2016-04-19	0.0146667	2.74	0.0366667	1.18667	1.15
2016-04-26	0.0156667	3.9	0.0606667	1.83667	1.776
2016-05-03	0.0196667	3.51	0.0166667	0.266667	0.25
2016-05-10	0.0346667	2.02	0.0566667	2.71667	2.66
2016-05-17	0.0316667	2.66	0.0226667	1.61667	1.594
2016-05-24	0.0196667	3.06	0.0146667	0.476667	0.462
2016-06-08	0.0236667	0.38	0.0586667	2.39667	2.338
2016-06-14	0.0156667	5.1	0.0266667	0.346667	0.32
2016-07-06	0.0296667	13.36	0.0256667	0.326667	0.301

## Sheet: phyto < 6 µm 2015
Date	Cyano	Peuk < 1	Peuk 1-3	Nano
2015-01-08	144.323	11509.7	673.505	564.634
2015-01-15	68.0081	19489.2	718.943	467.22
2015-01-22	223.214	44977.7	1294.64	375.889
2015-01-29	306.858	28499.4	594.538	92.4511
2015-02-05	271.474	11791.4	1038.68	103.501
2015-02-12	191.074	6476.4	603.391	280.354
2015-02-19	106.936	10736.4	1657.5	345.846
2015-02-26	361.717	5895.99	750.563	455.857
2015-03-05	42.7794	13004.9	3328.24	774.366
2015-03-12	244.705	38284.1	4967.51	914.704
2015-03-19	721.879	26489.3	758.585	227.999
2015-03-26	928.634	11623.2	898.019	295.556
2015-04-02	311.77	26400.2	890.771	206.697
2015-04-09	5820.42	44948.5	1186.91	343.351
2015-04-16	12521.7	21044.2	1561.61	1658.38
2015-04-23	3931.76	3863.11	2521.32	928.046
2015-04-30	18683.8	46973.3	2952.88	1924.05
2015-05-06	60126.6	21343.6	1486.21	1067.6
2015-05-12	18368.3	13127.7	2902.68	292.626

## Sheet: phyto < 6 µm 2016
Date	Cyano	Peuk < 1	Peuk 1-3	Nano
2016-01-12	2060.89	26975.1	272.688	125.856
2016-01-19	7787.33	32297.8	1054.04	398.544
2016-01-26	2320.74	20886.7	423.221	153.476
2016-02-02	2013.69	3361.4	734.159	314.64
2016-02-09	624.035	10650.6	1137.95	398.544
2016-02-16	136.344	19271.7	1017.34	178.296
2016-02-23	1225.88	52938.6	2311.96	1069.95
2016-03-02	2333.47	19958.2	1177.49	629.069
2016-03-08	930.162	33432.1	1940.97	1908.71
2016-03-15	591.432	46164	1236.63	2682.95
2016-03-21	2646.91	21281.6	520.878	722.851
2016-03-30	366.741	30476.7	1126.8	1047.07
2016-04-05	5479.85	27075	1599.84	770.687
2016-04-12	10433.5	51402.2	3975.68	2296.12
2016-04-19	12214.3	63499.7	2314.18	1598.13
2016-04-26	15111.3	78695	2074.92	1283.73
2016-05-03	23238.8	75642.4	4820.79	650.106
2016-05-10	27605.4	45498.5	4938.34	1423.44
2016-05-17	11837.4	38860.6	11931.4	1058.39
2016-05-24	24013.9	48498.3	7808.09	5153.27
2016-05-31	7016.49	16033.4	5915.99	4364.39
2016-06-08	4943.23	7467.56	4478.05	6748.04
2016-06-14	613.853	6077.76	4856.13	2216.86

## Sheet: phyto 6-200 µm 2015
Date	Pseudo-nitzschia sp	Chaetoceros spp	other diatoms	Plagioselmis prolonga	Chlorophytes	Prymnesiophyceae	Dinophyceae	Euglenophyceae	Crysophyceae
2015-01-08	0	15.2744	4.49248	98.8345	145.556	37.7368	26.9549	1.79699	0
2015-01-15	0	11.6804	33.2443	214.74	130.282	0	17.0714	0	0
2015-01-22	0	89.8495	8.98495	79.9661	43.1278	19.7669	5.39097	0	35.9398
2015-01-29	0	0	23.3609	32.3458	32.3458	5.39097	4.49248	0	11.6804
2015-02-05	0	0	18.8684	106.921	48.5188	9.88345	3.59398	0.898495	20.6654
2015-02-12	0	0	35.0413	73.6766	28.7519	15.2744	2.69549	0.898495	35.9398
2015-02-19	0	4.49248	14.3759	186.887	43.1278	12.5789	6.28947	0.898495	65.5902
2015-02-26	0	0.898495	54.8082	132.079	26.0564	14.3759	0	0	44.0263
2015-03-05	0	0	69.1842	141.064	28.7519	9.88345	9.88345	1.79699	61.0977
2015-03-12	0	0.898495	16.1729	217.436	51.2142	26.9549	13.4774	0.898495	18.8684
2015-03-19	0	0	23.3609	81.7631	102.428	29.6504	25.1579	0.898495	34.1428
2015-03-26	3.59398	5.39097	20.6654	93.4435	58.4022	8.08646	16.1729	2.69549	17.0714
2015-04-02	0	0	50.3157	38.6353	57.5037	8.08646	6.28947	11.6804	4.49248
2015-04-09	2.69549	1.79699	9.88345	101.53	71.8796	1.79699	8.08646	1.79699	12.5789
2015-04-16	80.8646	442.958	122.195	62.8947	59.3007	7.18796	4.49248	0	0
2015-04-23	134.774	235.406	37.7368	104.225	69.1842	8.98495	32.3458	0	0
2015-04-30	309.082	61.9962	21.5639	104.225	60.1992	7.18796	35.9398	0	8.08646
2015-05-06	907.48	335.139	26.0564	104.225	53.0112	8.98495	35.0413	0	0
2015-05-12	978.462	237.203	56.6052	53.9097	44.9248	13.4774	35.0413	0	10.7819

## Sheet: phyto 6-200 µm 2016
Date	Pseudo-nitzschia sp	Chaetoceros spp	other diatoms	Plagioselmis prolonga	Chlorophytes	Prymnesiophyceae	Dinophyceae	Euglenophyceae	Crysophyceae
2016-01-12	0	0	10.7819	113.21	55.7067	18.8684	13.4774	6.28947	6.28947
2016-01-19	0	0	6.28947	35.9398	40.4323	3.59398	3.59398	0	0
2016-01-26	0	0	3.59398	73.6766	35.9398	8.08646	8.08646	0.898495	0.898495
2016-02-02	0.898495	0	17.0714	79.9661	50.3157	16.1729	9.88345	0.898495	0.898495
2016-02-09	0	0	17.9699	150.049	44.9248	7.18796	7.18796	3.59398	3.59398
2016-02-16	0	0	28.7519	101.53	34.1428	8.98495	4.49248	0	0
2016-02-23	5.39097	0	23.3609	148.252	68.2857	3.59398	15.2744	0.898495	0.898495
2016-03-02	0	0	6.28947	25.1579	26.0564	0.898495	3.59398	0	0
2016-03-08	4.49248	15.2744	29.6504	213.842	88.9511	4.49248	8.98495	1.79699	1.79699
2016-03-15	0	0	10.7819	124.891	58.4022	10.7819	8.08646	0	0
2016-03-21	3.59398	0	7.18796	61.9962	66.4887	5.39097	7.18796	0	0
2016-03-30	0	0	24.2594	163.526	85.3571	8.08646	17.9699	0	0
2016-04-05	7.18796	6.28947	19.7669	92.545	56.6052	5.39097	8.98495	6.28947	6.28947
2016-04-12	0	0	8.98495	213.842	113.21	4.49248	9.88345	4.49248	4.49248
2016-04-19	10.7819	23.3609	79.9661	222.827	188.684	11.6804	7.18796	0.898495	0.898495
2016-04-26	0	28.7519	91.6465	216.537	146.455	2.69549	11.6804	0	0
2016-05-03	0	1.79699	46.7218	73.6766	95.2405	2.69549	3.59398	0	0
2016-05-10	23.3609	169.816	14.3759	66.4887	37.7368	3.59398	11.6804	0	0
2016-05-17	17.9699	33.2443	19.7669	135.673	55.7067	4.49248	29.6504	0	0
2016-05-24	547.184	31.4473	51.2142	35.0413	34.1428	5.39097	34.1428	0	0
2016-05-31	82.6616	10.7819	8.98495	56.6052	91.6465	19.7669	44.0263	0	0
2016-06-08	94.342	620.86	45.8233	25.1579	69.1842	12.5789	51.2142	1.79699	1.79699
2016-06-14	13.4774	300.996	15.2744	15.2744	30.5488	9.88345	43.1278	0	0

## Sheet: HPLC 2015
Date	Chl a
2015-01-08	1.30955
2015-01-15	1.39564
2015-01-22	1.66955
2015-01-29	0.958951
2015-02-05	1.17292
2015-02-12	0.656595
2015-02-19
2015-02-26	1.02067
2015-03-05	1.0008
2015-03-12
2015-03-19	0.736264
2015-03-26
2015-04-02	0.789208
2015-04-09	0.611411
2015-04-16	1.0738
2015-04-23	1.30082
2015-04-30	1.52849
2015-05-06	1.89122
2015-05-12	1.07389

## Sheet: HPLC 2016
Date	Chl a
2016-01-12	0.95911
2016-01-19	0.711138
2016-01-26	0.75031
2016-02-02	0.758921
2016-02-09	1.38793
2016-02-16	0.81746
2016-02-23	1.12689
2016-03-02	0.617161
2016-03-08	1.26331
2016-03-15	0.88097
2016-03-21	0.938711
2016-03-30	1.161
2016-04-05	1.08867
2016-04-12	1.62388
2016-04-19	1.15482
2016-04-26	1.03485
2016-05-03	1.15135
2016-05-10	2.23785
2016-05-17	0.88513
2016-05-24	1.3334
2016-05-31	1.60255
2016-06-08	1.09267
2016-06-14	1.16517
